# Supplementary material for: Dynamic Physiological Phenotyping of Drought-Stressed Pepper Plants Treated With “Productivity-Enhancing” and “Survivability-Enhancing” Biostimulants
Source: Front Plant Sci. 2019 Jul 17;10:905. doi: 10.3389/fpls.2019.00905 (PMC6654182; doi:10.3389/fpls.2019.00905)
Supplement: Supplementary file 5 [file Table_4.xlsx]

## Sheet: גיליון3
	Shoot - Dry Weight (gr)	Roots - Dry Weight (gr)	Total Plant dry weight			Total fresh fruit - Weight (gr)	Total dry fruit weight (gr)
control-14	47.5	14.5	78.321		control-14	302	16.321
control-2	45	14.3	66.9997		control-2	122.7	7.6997
control-20	52.2	15.2	76.7035		control-20	179	9.30348
control-23	34.6	13.9	61.7679		control-23	182.5	13.2679
control-24	44	14	66.675		control-24	154.4	8.675
control-5	36.6	10.8	47.6811		control-5	3.8	0.281086
control-6	41.4	13.1	57.1761		control-6	47.2	2.67607
control-7	37.2	14.4	55.6381		control-7	76.7	4.03808
control-9	36.5	12.4	60.2214		control-9	211.4	11.3214
sea WEED-1	51.7	15	79.8942		sea WEED-1	195.9	13.1942
sea WEED-14	43	13.4	68.275		sea WEED-14	199.6	11.875
sea WEED-15	39.1	15.1	55.3792		sea WEED-15	19.6	1.17921
sea WEED-16	42	12.9	62.6746		sea WEED-16	147.1	7.77458
sea WEED-17	53.4	14.1	68.7107		sea WEED-17	12.7	1.21067
sea WEED-19	52.6	15.6	72.4388		sea WEED-19	69	4.23883
sea WEED-2	58.4	20.4	83.9877		sea WEED-2	74.8	5.18774
sea WEED-22	57.8	16.5	79.1725		sea WEED-22	88.8	4.87254
sea WEED-23	50.2	13.8	72.7352		sea WEED-23	125	8.73524
sea WEED-6	56.9	15.9	79.8264		sea WEED-6	130.1	7.02639
sea WEED-9	35.3	12.3	48.2552		sea WEED-9	8.6	0.655178
XFactor-12	33.1	11.3	46.609		XFactor-12	35.9	2.20896
XFactor-19	39.4	14.5	60.6856		XFactor-19	128	6.7856
XFactor-20	54.6	16.5	75.8314		XFactor-20	77.7	4.73143
XFactor-22	31.5	12	47.0508		XFactor-22	51.9	3.55082
XFactor-23	57.9	17.3	78.8813		XFactor-23	58.7	3.68127
XFactor-24	45.3	14.7	60.4808		XFactor-24	6.6	0.480828
XFactor-6	66.1	17.6	92.9846		XFactor-6	146.2	9.28457
XFactor-7	42.5	14.8	61.9034		XFactor-7	66.9	4.60342
control-10	23.1	10.6	34.6989		control-10	11.5	0.998941
control-12	20.8	10.3	38.7526		control-12	102.5	7.6526
control-16	22	10	37.3871		control-16	86.5	5.3871
control-18	19.7	9.3	33.6962		control-18	75.8	4.6962
control-19	18.5	8.9	33.0802		control-19	96.7	5.68016
control-21	16.7	8.8	28.8874		control-21	49	3.38739
control-22	15.1	9.4	28.0516		control-22	67.1	3.55156
control-3	24	10.2	38.6409		control-3	62.6	4.4409
control-4	9	5.7	17.6849		control-4	33.6	2.98485
sea WEED-11	17.8	9	31.2686		sea WEED-11	73.6	4.46857
sea WEED-12	19.7	9.5	33.4039		sea WEED-12	59.1	4.20387
sea WEED-13	18.7	9.5	30.5349		sea WEED-13	26.3	2.33491
sea WEED-18	15.3	7.4	27.0528		sea WEED-18	58.8	4.35279
sea WEED-20	19.8	9.7	34.3458		sea WEED-20	82.5	4.84578
sea WEED-21	14.1	6.6	21.05		sea WEED-21	2.8	0.35
sea WEED-3	24.3	12.2	41.9917		sea WEED-3	89.4	5.49171
sea WEED-4	24	10	40.0662		sea WEED-4	104.6	6.06622
sea WEED-5	21.4	10.3	35.3194		sea WEED-5	63.1	3.61937
sea WEED-8	17.9	10.6	30.6524		sea WEED-8	24.8	2.1524
XFactor-1	15.1	7.2	24.8797		XFactor-1	28	2.57974
XFactor-13	20.5	9.1	32.358		XFactor-13	40	2.75797
XFactor-14	12.7	6.9	24.5978		XFactor-14	49	4.99783
XFactor-15	20.2	10.4	34.6322		XFactor-15	54.8	4.03219
XFactor-17	21.5	9.1	36.2741		XFactor-17	98.9	5.67414
XFactor-21	19.5	10	33.275		XFactor-21	61.8	3.775
XFactor-3	15	9.2	26.4215		XFactor-3	29.6	2.22147
XFactor-4	26.8	12.1	43.4243		XFactor-4	72.2	4.52434
XFactor-5	16.1	8.8	27.3869		XFactor-5	30.2	2.48688
XFactor-8	24.7	11.3	41.8359		XFactor-8	97.8	5.83592
XFactor-9	22.6	10.2	36.604		XFactor-9	63.8	3.80397

## Sheet: Tests for heteroscedasticity_H
787.88	1.15836
477.84	5.02494
817.07	-1.88903
251.63	10.8744
755.51	-8.90189
276.33	-4.42236
469.92	-4.41071
295.71	2.58528
620.28	-8.73098
741.4	5.00849
616.59	-0.496662
368.7	-1.24914
334.85	7.70443
600.64	0.720345
658.42	1.61805
917.57	0.472063
817.71	0.548668
598.23	4.86297
735.27	5.24099
260.18	-3.05713
233.49	-3.39589
619.37	-8.22224
706.64	2.64851
384.96	-10.3741
875.97	-2.59656
419.21	1.37816
1018.1	4.54426
407.86	3.35675

## Sheet: Tests for heteroscedasticity_H1
255.37	6.26738
368.06	4.12492
392.16	1.43431
249.52	5.58629
378.67	-2.13089
228.44	1.93654
286.39	-2.08559
394.57	2.5556
165.76	-5.81962
336.01	-1.59688
361.98	-0.88951
329.61	-1.97864
266.98	-2.01713
432.59	-3.83
265.07	-7.91491
529.17	-1.49439
346.03	6.64983
306.83	4.05835
339.36	-2.39724
244.72	-2.96625
359.31	-1.7886
228.6	-2.36182
248.62	6.57176
473.03	-4.12518
331.02	0.683918
306.31	-4.81096
340.51	10.3115
298.18	-3.39853
454.41	2.46039
422.82	-1.03461
