# Supplementary material for: Dynamic Physiological Phenotyping of Drought-Stressed Pepper Plants Treated With “Productivity-Enhancing” and “Survivability-Enhancing” Biostimulants
Source: Front Plant Sci. 2019 Jul 17;10:905. doi: 10.3389/fpls.2019.00905 (PMC6654182; doi:10.3389/fpls.2019.00905)
Supplement: Supplementary file 9 [file Table_8.xlsx]

## Sheet: Transpiration Rate_E__GraphView
Timestamp	control-10 - Transpiration Rate (g/min)	control-10 - E (g<sub>water</sub>/g<sub>plant</sub>/min)	control-12 - Transpiration Rate (g/min)	control-12 - E (g<sub>water</sub>/g<sub>plant</sub>/min)	control-14 - Transpiration Rate (g/min)	control-14 - E (g<sub>water</sub>/g<sub>plant</sub>/min)	control-16 - Transpiration Rate (g/min)	control-16 - E (g<sub>water</sub>/g<sub>plant</sub>/min)	control-17 - Transpiration Rate (g/min)	control-17 - E (g<sub>water</sub>/g<sub>plant</sub>/min)	control-18 - Transpiration Rate (g/min)	control-18 - E (g<sub>water</sub>/g<sub>plant</sub>/min)	control-19 - Transpiration Rate (g/min)	control-19 - E (g<sub>water</sub>/g<sub>plant</sub>/min)	control-2 - Transpiration Rate (g/min)	control-2 - E (g<sub>water</sub>/g<sub>plant</sub>/min)	control-20 - Transpiration Rate (g/min)	control-20 - E (g<sub>water</sub>/g<sub>plant</sub>/min)	control-21 - Transpiration Rate (g/min)	control-21 - E (g<sub>water</sub>/g<sub>plant</sub>/min)	control-22 - Transpiration Rate (g/min)	control-22 - E (g<sub>water</sub>/g<sub>plant</sub>/min)	control-23 - Transpiration Rate (g/min)	control-23 - E (g<sub>water</sub>/g<sub>plant</sub>/min)	control-24 - Transpiration Rate (g/min)	control-24 - E (g<sub>water</sub>/g<sub>plant</sub>/min)	control-3 - Transpiration Rate (g/min)	control-3 - E (g<sub>water</sub>/g<sub>plant</sub>/min)	control-4 - Transpiration Rate (g/min)	control-4 - E (g<sub>water</sub>/g<sub>plant</sub>/min)	control-5 - Transpiration Rate (g/min)	control-5 - E (g<sub>water</sub>/g<sub>plant</sub>/min)	control-6 - Transpiration Rate (g/min)	control-6 - E (g<sub>water</sub>/g<sub>plant</sub>/min)	control-7 - Transpiration Rate (g/min)	control-7 - E (g<sub>water</sub>/g<sub>plant</sub>/min)	control-9 - Transpiration Rate (g/min)	control-9 - E (g<sub>water</sub>/g<sub>plant</sub>/min)	sea WEED-1 - Transpiration Rate (g/min)	sea WEED-1 - E (g<sub>water</sub>/g<sub>plant</sub>/min)	sea WEED-11 - Transpiration Rate (g/min)	sea WEED-11 - E (g<sub>water</sub>/g<sub>plant</sub>/min)	sea WEED-12 - Transpiration Rate (g/min)	sea WEED-12 - E (g<sub>water</sub>/g<sub>plant</sub>/min)	sea WEED-13 - Transpiration Rate (g/min)	sea WEED-13 - E (g<sub>water</sub>/g<sub>plant</sub>/min)	sea WEED-14 - Transpiration Rate (g/min)	sea WEED-14 - E (g<sub>water</sub>/g<sub>plant</sub>/min)	sea WEED-15 - Transpiration Rate (g/min)
2018-06-19T00:00:00	0.267545	-0.00669727	0.306123	-0.000839438	0.145427	-0.0123787	0.220498	-0.00073384	0.287704	-0.00683493	0.115989	0.000262468	0.0744582	0.00148655	0.204921	0.00100103	0.223409	0.00120236	-0.0296153	0.000302204	0.265035	0.00159273	0.210742	0.00465523	0.118971	-0.0078432	0.28205	0.00111555	0.212089	-0.00151282	0.130361	0.000349084	0.188935	0.00346565	0.392205	0.0027367	0.278288	-0.00641571	1.26165	0.00617637	0.990243	0.00868714	0.800281	-0.0123066	1.20446	-0.00808995	0.971433	0.0130954	0.912013
2018-06-19T00:03:00	0.242752	-0.00607664	0.274149	-0.000751761	0.134664	-0.0114625	0.200508	-0.000667314	0.251202	-0.00596778	0.103506	0.000234221	0.0776308	0.00154989	0.184791	0.000902691	0.20327	0.00109398	-0.021464	0.000219025	0.246822	0.00148328	0.191839	0.00423767	0.109287	-0.0072048	0.256352	0.00101392	0.198389	-0.0014151	0.120724	0.000323276	0.1742	0.00319537	0.346414	0.00241718	0.25375	-0.00585001	1.02727	0.00502899	0.801617	0.00703238	0.641603	-0.00986645	0.975605	-0.00655282	0.784129	0.0105705	0.734379
2018-06-19T00:06:00	0.219558	-0.00549605	0.244327	-0.000669985	0.124485	-0.0105961	0.18183	-0.000605151	0.217583	-0.00516907	0.0919391	0.000208047	0.0803866	0.00160491	0.166075	0.000811264	0.184456	0.000992722	-0.0135189	0.000137951	0.229628	0.00137995	0.174324	0.00385076	0.100233	-0.00660789	0.232269	0.000918662	0.185361	-0.00132217	0.111535	0.000298671	0.160381	0.00294188	0.304033	0.00212146	0.23081	-0.00532113	0.811534	0.00397284	0.628116	0.0055103	0.495839	-0.00762492	0.764976	-0.00513809	0.611958	0.00824951	0.571155
2018-06-19T00:09:00	0.197913	-0.00495422	0.21659	-0.000593926	0.114874	-0.00977806	0.164422	-0.000547214	0.186745	-0.00443646	0.0812571	0.000183875	0.0827394	0.00165189	0.148726	0.000726517	0.166925	0.000898371	-0.00578544	5.90365e-05	0.213422	0.00128256	0.158148	0.00349345	0.0917859	-0.00605104	0.209751	0.000829599	0.172989	-0.00123392	0.102786	0.000275242	0.147448	0.00270465	0.264948	0.00184874	0.209415	-0.00482789	0.613815	0.00300491	0.469236	0.00411649	0.362556	-0.00557532	0.571972	-0.00384175	0.454415	0.00612574	0.42186
2018-06-19T00:12:00	0.177768	-0.00444993	0.19087	-0.000523396	0.105816	-0.00900701	0.148242	-0.000493365	0.158589	-0.00376758	0.0714291	0.000161635	0.0847031	0.00169109	0.132697	0.000648217	0.150634	0.000810696	0.00173078	-1.76614e-05	0.198173	0.00119093	0.143265	0.00316468	0.0839246	-0.00553277	0.188749	0.000746533	0.161256	-0.00115023	0.0944664	0.000252964	0.135374	0.00248317	0.229043	0.0015982	0.189514	-0.0043691	0.433499	0.00212218	0.324476	0.00284655	0.241321	-0.00371099	0.395994	-0.00265976	0.310994	0.00419236	0.286011
2018-06-19T00:15:00	0.159071	-0.00398191	0.167098	-0.000458211	0.0972932	-0.00828156	0.133248	-0.000443464	0.133018	-0.00316008	0.0624244	0.000141259	0.0862915	0.00172281	0.117941	0.000576134	0.135542	0.000729471	0.00902432	-9.20871e-05	0.183852	0.00110486	0.129625	0.00286338	0.0766266	-0.00505165	0.169214	0.000669268	0.150146	-0.00107099	0.0865662	0.000231809	0.124129	0.00227691	0.196203	0.00136905	0.171057	-0.00394358	0.26997	0.00132163	0.193333	0.00169606	0.1317	-0.00202526	0.236443	-0.00158811	0.181191	0.00244254	0.163125
2018-06-19T00:18:00	0.141774	-0.00354892	0.145208	-0.000398183	0.0892899	-0.00760032	0.1194	-0.000397375	0.109931	-0.00261161	0.0542121	0.000122675	0.0875184	0.0017473	0.10441	0.000510037	0.121606	0.000654469	0.0160897	-0.000164185	0.170426	0.00102418	0.117181	0.0025885	0.06987	-0.00460622	0.151096	0.000597611	0.139643	-0.000996065	0.0790759	0.000211751	0.113685	0.00208534	0.166312	0.00116048	0.15399	-0.00355013	0.122612	0.000600245	0.075305	0.000660631	0.0332598	-0.000511464	0.0927199	-0.000622769	0.0645	0.000869492	0.0527218
2018-06-19T00:21:00	0.125826	-0.00314972	0.12513	-0.000343127	0.0817895	-0.00696189	0.106655	-0.000354958	0.0892293	-0.00211981	0.0467613	0.000105815	0.0883976	0.00176485	0.0920576	0.000449696	0.108784	0.000585462	0.0229215	-0.000233898	0.157866	0.000948696	0.105885	0.00233897	0.0636328	-0.00419503	0.134348	0.000531367	0.129729	-0.000925351	0.0719854	0.000192764	0.104014	0.00190795	0.139256	0.000971688	0.138264	-0.00318756	-0.00919111	-4.49948e-05	-0.0301108	-0.000264154	-0.0544332	0.000837064	-0.0357748	0.000240288	-0.0395836	-0.000533608	-0.0456828
2018-06-19T00:24:00	0.111178	-0.00278305	0.106798	-0.000292857	0.0747759	-0.0063649	0.0949714	-0.000316075	0.070814	-0.00168232	0.0400412	9.06082e-05	0.088943	0.00177574	0.0808359	0.000394878	0.0970338	0.000522225	0.0295141	-0.000301172	0.146141	0.000878234	0.0956886	0.00211374	0.057893	-0.00381663	0.118918	0.000470342	0.120389	-0.000858727	0.0652851	0.000174822	0.0950873	0.0017442	0.114917	0.000801863	0.123825	-0.0028547	-0.126056	-0.000617106	-0.123416	-0.0010827	-0.131812	0.00202699	-0.14964	0.00100508	-0.131565	-0.00177356	-0.132571
2018-06-19T00:27:00	0.0977802	-0.00244766	0.090143	-0.000247187	0.0682327	-0.00580794	0.0843087	-0.000280589	0.0545857	-0.00129678	0.034021	7.69852e-05	0.0891684	0.00178024	0.0706976	0.000345353	0.0863136	0.00046453	0.0358622	-0.000365949	0.13522	0.000812605	0.0865438	0.00191173	0.0526285	-0.00346956	0.104759	0.000414341	0.111606	-0.000796076	0.0589649	0.000157897	0.0868756	0.00159357	0.0931823	0.000650201	0.110624	-0.00255034	-0.2286	-0.00111911	-0.205114	-0.00179941	-0.199311	0.00306497	-0.249475	0.00167564	-0.211949	-0.00285718	-0.208424
2018-06-19T00:30:00	0.0855819	-0.00214231	0.0750975	-0.00020593	0.0621434	-0.00528962	0.0746249	-0.00024836	0.0404454	-0.000960855	0.0286698	6.48761e-05	0.0890876	0.00177863	0.0615956	0.000300891	0.076581	0.00041215	0.0419602	-0.000428175	0.125073	0.000751627	0.0784028	0.0017319	0.0478173	-0.00315238	0.0918216	0.000363169	0.103363	-0.000737279	0.0530152	0.000141965	0.0793506	0.00145554	0.073935	0.000515899	0.0986073	-0.00227331	-0.317439	-0.00155401	-0.275706	-0.0024187	-0.257363	0.00395768	-0.335879	0.00225599	-0.281241	-0.00379128	-0.273726
2018-06-19T00:33:00	0.0745335	-0.00186574	0.0615937	-0.0001689	0.0564919	-0.00480857	0.0658784	-0.00021925	0.028294	-0.000672175	0.0239568	5.42112e-05	0.0887145	0.00177118	0.0534826	0.000261259	0.0677939	0.000364859	0.0478026	-0.000487793	0.115669	0.000695115	0.0712173	0.00157317	0.0434374	-0.00286364	0.0800556	0.000316633	0.0956433	-0.000682218	0.047426	0.000126998	0.0724838	0.00132958	0.05706	0.000398149	0.0877245	-0.00202242	-0.393188	-0.00192484	-0.335695	-0.00294497	-0.306402	0.00471179	-0.40945	0.00275014	-0.339947	-0.00458265	-0.328958
2018-06-19T00:36:00	0.0645853	-0.00161672	0.0495636	-0.000135911	0.0512617	-0.00436338	0.0580277	-0.000193122	0.0180321	-0.000428386	0.0198511	4.49205e-05	0.0880629	0.00175817	0.0463113	0.000226228	0.0599101	0.000322429	0.053384	-0.000544748	0.106978	0.000642885	0.0649394	0.00143449	0.0394669	-0.00260187	0.0694124	0.000274537	0.0884316	-0.000630777	0.0421876	0.000112971	0.0662466	0.00121517	0.0424419	0.000296148	0.0779238	-0.00179647	-0.456465	-0.00223461	-0.385583	-0.00338262	-0.34686	0.00533395	-0.470789	0.00316213	-0.38857	-0.00523812	-0.374602
2018-06-19T00:39:00	0.0556873	-0.00139398	0.0389394	-0.000106778	0.0464366	-0.00395266	0.0510312	-0.000169837	0.00956082	-0.000227135	0.0163219	3.69345e-05	0.0871465	0.00173988	0.0400344	0.000195565	0.0528875	0.000284634	0.0586989	-0.000598983	0.0989688	0.000594754	0.0595211	0.00131481	0.0358836	-0.00236564	0.0598428	0.000236688	0.0817107	-0.000582838	0.0372899	9.98556e-05	0.0606105	0.00111178	0.0299652	0.000209089	0.0691537	-0.00159428	-0.507886	-0.00248634	-0.425872	-0.00373606	-0.379172	0.00583083	-0.520493	0.00349598	-0.427616	-0.00576448	-0.411142
2018-06-19T00:42:00	0.0477896	-0.00119628	0.0296533	-8.1314e-05	0.0420001	-0.00357503	0.0448474	-0.000149257	0.00278088	-6.6065e-05	0.0133384	3.01831e-05	0.0859793	0.00171657	0.0346046	0.000169041	0.0466839	0.000251248	0.0637418	-0.000650442	0.091611	0.000550538	0.0549144	0.00121304	0.0326656	-0.0021535	0.0512976	0.000202891	0.0754642	-0.000538282	0.0327234	8.76272e-05	0.0555467	0.0010189	0.0195147	0.000136168	0.0613627	-0.00141467	-0.548068	-0.00268305	-0.457065	-0.00400971	-0.40377	0.00620911	-0.559163	0.00375571	-0.457591	-0.00616856	-0.43906
2018-06-19T00:45:00	0.0408423	-0.00102238	0.0216373	-5.93329e-05	0.037936	-0.0032291	0.0394348	-0.000131243	-0.00240683	5.71787e-05	0.0108697	2.45968e-05	0.084575	0.00168854	0.0299747	0.000146424	0.0412572	0.000222042	0.0685072	-0.00069907	0.0848742	0.000510052	0.0510711	0.00112815	0.0297909	-0.00196398	0.0437277	0.00017295	0.0696757	-0.000496993	0.0284779	7.62587e-05	0.0510269	0.000935991	0.0109747	7.65788e-05	0.0544993	-0.00125644	-0.577626	-0.00282775	-0.479663	-0.00420796	-0.421089	0.00647543	-0.587397	0.00394535	-0.478999	-0.00645715	-0.458837
2018-06-19T00:48:00	0.0347957	-0.000871015	0.0148236	-4.06486e-05	0.0342279	-0.00291347	0.0347518	-0.000115658	-0.00610147	0.000144952	0.00888501	2.01057e-05	0.0829475	0.00165604	0.0260973	0.000127484	0.0365652	0.00019679	0.0729897	-0.000744811	0.0787275	0.000473114	0.0479434	0.00105906	0.0272374	-0.00179564	0.037084	0.000146673	0.0643286	-0.000458852	0.0245439	6.5724e-05	0.0470223	0.000862534	0.00423005	2.95162e-05	0.0485119	-0.0011184	-0.597177	-0.00292347	-0.49417	-0.00433523	-0.431562	0.00663648	-0.605795	0.00406892	-0.492345	-0.00663706	-0.470957
2018-06-19T00:51:00	0.0295997	-0.000740947	0.00914432	-2.50752e-05	0.0308595	-0.00262675	0.0307568	-0.000102362	-0.00840219	0.000199609	0.00735345	1.66399e-05	0.0811107	0.00161937	0.0229252	0.000111988	0.0325658	0.000175265	0.0771838	-0.000787608	0.0731405	0.000439539	0.045483	0.00100471	0.0249831	-0.00164703	0.0313171	0.000123864	0.0594064	-0.000423742	0.0209113	5.59966e-05	0.0435044	0.000798005	-0.000834813	-5.8251e-06	0.043349	-0.000999376	-0.607338	-0.00297321	-0.501088	-0.00439592	-0.435621	0.00669891	-0.614955	0.00413045	-0.498135	-0.00671511	-0.475901
2018-06-19T00:54:00	0.0252045	-0.000630926	0.00453165	-1.24265e-05	0.0278145	-0.00236756	0.0274084	-9.1218e-05	-0.00940811	0.000223507	0.00624419	1.41298e-05	0.0790782	0.00157879	0.0204111	9.97068e-05	0.0292168	0.000157242	0.0810839	-0.000827406	0.0680825	0.000409143	0.0436422	0.000964044	0.0230061	-0.00151669	0.0263781	0.00010433	0.0548926	-0.000391546	0.0175704	4.70502e-05	0.0404446	0.000741879	-0.00433527	-3.02503e-05	0.0389591	-0.000898171	-0.608725	-0.00298	-0.500918	-0.00439443	-0.433702	0.00666939	-0.615477	0.00413395	-0.496874	-0.00669811	-0.474153
2018-06-19T00:57:00	0.0215602	-0.000539701	0.000917682	-2.5164e-06	0.0250765	-0.0021345	0.0246649	-8.20875e-05	-0.0092184	0.000219	0.0055264	1.25055e-05	0.0768641	0.00153459	0.0185077	9.04087e-05	0.026476	0.000142491	0.0846847	-0.00086415	0.063523	0.000381742	0.0423727	0.000936001	0.0212843	-0.00140318	0.0222176	8.78742e-05	0.0507708	-0.000362145	0.0145112	3.88584e-05	0.0378143	0.000693632	-0.00638672	-4.45649e-05	0.0352906	-0.000813598	-0.601954	-0.00294685	-0.494164	-0.00433517	-0.426236	0.00655458	-0.607959	0.00408346	-0.489066	-0.00659285	-0.466194
2018-06-19T01:00:00	0.018617	-0.000466026	-0.00176543	4.8411e-06	0.0226291	-0.00192618	0.0224849	-7.48321e-05	-0.0079322	0.000188444	0.00516922	1.16973e-05	0.074482	0.00148703	0.0171677	8.38629e-05	0.0243014	0.000130788	0.0879805	-0.000897782	0.0594314	0.000357154	0.0416265	0.000919519	0.0197957	-0.00130504	0.0187866	7.43039e-05	0.0470245	-0.000335423	0.0117241	3.13949e-05	0.035585	0.000652739	-0.0071046	-4.9574e-05	0.0322921	-0.00074447	-0.587642	-0.00287679	-0.481327	-0.00422256	-0.413658	0.00636116	-0.593002	0.003983	-0.475216	-0.00640616	-0.452507
2018-06-19T01:03:00	0.0163249	-0.000408649	-0.00358557	9.8322e-06	0.0204561	-0.00174122	0.0208267	-6.93136e-05	-0.00564864	0.000134194	0.00514183	1.16353e-05	0.0719459	0.0014364	0.0163438	7.98383e-05	0.0226507	0.000121904	0.0909661	-0.000928247	0.0557771	0.000335193	0.0413557	0.000913538	0.0185182	-0.00122082	0.0160358	6.34242e-05	0.0436371	-0.000311261	0.00919901	2.46333e-05	0.033728	0.000618676	-0.00660431	-4.60831e-05	0.0299121	-0.000689599	-0.566405	-0.00277282	-0.462909	-0.00406098	-0.396401	0.00609578	-0.571203	0.00383658	-0.455831	-0.00614483	-0.433574
2018-06-19T01:06:00	0.0146341	-0.000366324	-0.00461058	1.26429e-05	0.0185412	-0.00157822	0.0196489	-6.53938e-05	-0.00246689	5.86055e-05	0.00541339	1.22498e-05	0.0692695	0.00138296	0.0159888	7.81041e-05	0.0214819	0.000115613	0.0936358	-0.00095549	0.0525294	0.000315676	0.0415123	0.000916995	0.01743	-0.00114908	0.0139162	5.50407e-05	0.0405922	-0.000289542	0.00692624	1.85472e-05	0.0322148	0.00059092	-0.00500126	-3.48975e-05	0.0280989	-0.000647797	-0.53886	-0.00263797	-0.439414	-0.00385487	-0.374898	0.00576511	-0.543163	0.00364824	-0.431414	-0.00581568	-0.409877
2018-06-19T01:09:00	0.0134946	-0.000337801	-0.00490833	1.34594e-05	0.0168679	-0.00143579	0.0189099	-6.29343e-05	0.00151392	-3.59659e-05	0.00595304	1.3471e-05	0.0664666	0.001327	0.0160553	7.84291e-05	0.0207527	0.000111688	0.0959842	-0.000979454	0.0496578	0.000298419	0.0420481	0.00092883	0.0165089	-0.00108835	0.0123785	4.89588e-05	0.0378733	-0.000270148	0.0048959	1.31103e-05	0.0310168	0.000568945	-0.00241088	-1.68225e-05	0.026801	-0.000617877	-0.505622	-0.00247526	-0.411343	-0.00360861	-0.349582	0.00537582	-0.509479	0.003422	-0.402472	-0.00542552	-0.3819
2018-06-19T01:12:00	0.0128567	-0.000321832	-0.0045467	1.24678e-05	0.0154199	-0.00131254	0.0185682	-6.17969e-05	0.00619464	-0.000147165	0.00672996	1.52291e-05	0.0635512	0.0012688	0.0164961	8.05825e-05	0.0204209	0.000109903	0.0980058	-0.00100008	0.0471317	0.000283238	0.0429151	0.000947983	0.0157329	-0.0010372	0.0113735	4.49842e-05	0.0354638	-0.000252961	0.00309815	8.2963e-06	0.0301055	0.000552228	0.00105143	7.3366e-06	0.0259671	-0.00059865	-0.467309	-0.0022877	-0.379199	-0.00332662	-0.320889	0.00493457	-0.470752	0.00316189	-0.369508	-0.00498115	-0.350124
2018-06-19T01:15:00	0.0126703	-0.000317167	-0.00359354	9.8541e-06	0.014181	-0.00120708	0.0185821	-6.18434e-05	0.0114761	-0.000272636	0.0077133	1.74542e-05	0.060537	0.00120862	0.017264	8.43333e-05	0.0204446	0.00011003	0.0996951	-0.00101732	0.0449205	0.00026995	0.0440654	0.000973392	0.01508	-0.000994159	0.0108522	4.29223e-05	0.0333474	-0.000237865	0.00152314	4.0787e-06	0.0294521	0.000540243	0.00527026	3.67745e-05	0.0255454	-0.000588929	-0.424537	-0.00207831	-0.343484	-0.00301329	-0.289249	0.00444803	-0.427581	0.00287192	-0.333028	-0.00448939	-0.315032
2018-06-19T01:18:00	0.0128857	-0.000322559	-0.00211671	5.8044e-06	0.0131347	-0.00111802	0.0189103	-6.29354e-05	0.0172592	-0.000410024	0.00887223	2.00767e-05	0.0574379	0.00114674	0.0183115	8.94504e-05	0.0207814	0.000111843	0.101047	-0.00103111	0.0429936	0.000258371	0.0454508	0.001004	0.0145283	-0.000957786	0.0107653	4.25787e-05	0.0315074	-0.000224741	0.000161032	4.312e-07	0.0290282	0.000532467	0.0101302	7.06857e-05	0.0254845	-0.000587525	-0.377921	-0.0018501	-0.3047	-0.00267305	-0.255098	0.00392286	-0.380564	0.00255612	-0.293538	-0.00395704	-0.277105
2018-06-19T01:21:00	0.013453	-0.000336759	-0.000184085	5.048e-07	0.0122647	-0.00104397	0.019511	-6.49348e-05	0.0234448	-0.000556974	0.0101759	2.30268e-05	0.0542676	0.00108345	0.0195914	9.57029e-05	0.0213893	0.000115115	0.102055	-0.0010414	0.0413204	0.000248316	0.0470234	0.00103873	0.0140557	-0.000926628	0.0110637	4.37589e-05	0.0299275	-0.000213471	-0.000998016	-2.6725e-06	0.0288052	0.000528376	0.0155158	0.000108265	0.0257329	-0.000593252	-0.328079	-0.0016061	-0.263349	-0.0023103	-0.218869	0.00336572	-0.330301	0.00221852	-0.251542	-0.00339091	-0.236828
2018-06-19T01:24:00	0.0143222	-0.000358517	0.00213648	-5.8586e-06	0.0115548	-0.000983542	0.0203429	-6.77032e-05	0.0299337	-0.00071113	0.0115935	2.62346e-05	0.0510401	0.00101901	0.0210565	0.00010286	0.022226	0.000119618	0.102715	-0.00104813	0.0398704	0.000239601	0.0487351	0.00107655	0.0136401	-0.000899233	0.0116983	4.62685e-05	0.0285911	-0.000203938	-0.00196385	-5.2588e-06	0.0287544	0.000527445	0.0213117	0.000148707	0.0262391	-0.000604921	-0.275628	-0.00134933	-0.219935	-0.00192943	-0.180994	0.0027833	-0.277391	0.00186314	-0.207545	-0.00279782	-0.194681
2018-06-19T01:27:00	0.0154435	-0.000386585	0.00477711	-1.30996e-05	0.0109886	-0.000935342	0.0213642	-7.11024e-05	0.0366268	-0.000870136	0.0130941	2.96303e-05	0.0477691	0.000953707	0.0226595	0.00011069	0.0232495	0.000125126	0.10302	-0.00105125	0.0386128	0.000232044	0.050538	0.00111637	0.0132597	-0.00087415	0.0126197	4.9913e-05	0.0274817	-0.000196025	-0.00274631	-7.3541e-06	0.0288474	0.00052915	0.0274024	0.000191207	0.0269514	-0.000621343	-0.221182	-0.00108279	-0.174959	-0.00153487	-0.141908	0.00218224	-0.222432	0.00149401	-0.162053	-0.00218456	-0.151147
2018-06-19T01:30:00	0.0167669	-0.000419714	0.00766995	-2.10322e-05	0.0105496	-0.000897981	0.0225336	-7.49942e-05	0.0434249	-0.00103164	0.014647	3.31442e-05	0.0444684	0.00088781	0.024353	0.000118963	0.0244176	0.000131413	0.102966	-0.0010507	0.0375173	0.00022546	0.0523839	0.00115715	0.0128923	-0.000849929	0.0137789	5.44979e-05	0.0265828	-0.000189613	-0.00335524	-8.9847e-06	0.0290554	0.000532967	0.0336726	0.000234958	0.0278185	-0.000641333	-0.165359	-0.000809512	-0.128923	-0.00113101	-0.102044	0.00156921	-0.166025	0.00111514	-0.11557	-0.00155794	-0.106709
2018-06-19T01:33:00	-0.00464628	0.000116307	-0.0119296	3.27128e-05	-0.0132314	0.00112625	0.00220855	-7.3503e-06	0.0321847	-0.000764607	0.0024661	5.5805e-06	0.0134657	0.000268842	0.000982909	4.8014e-06	0.000754066	4.0583e-06	0.0765355	-0.000780993	0.00829742	4.98635e-05	0.032844	0.000725515	-0.00685936	0.000452207	-0.0106559	-4.21459e-05	0.00170273	-1.21455e-05	-0.0248137	-6.64467e-05	0.00457945	8.40014e-05	0.0090489	6.31408e-05	0.00425048	-9.79914e-05	-0.127096	-0.000622197	-0.0972497	-0.000853146	-0.0750856	0.00115465	-0.125186	0.00084083	-0.0839582	-0.0011318	-0.0759732
2018-06-19T01:36:00	0.0494556	-0.00123799	0.0406532	-0.000111478	0.0424797	-0.00361585	0.0502498	-0.000167237	0.0754619	-0.00179274	0.0326538	7.38915e-05	0.067635	0.00135033	0.0517355	0.000252725	0.0571593	0.000307625	0.119315	-0.00121753	0.0735776	0.000442165	0.0838063	0.00185126	0.0316081	-0.00208378	0.0482954	0.000191016	0.0610178	-0.000435236	0.0175816	4.70804e-05	0.0553979	0.00101617	0.0750725	0.000523836	0.0601369	-0.00138641	-0.088378	-0.000432652	-0.0648391	-0.000568817	-0.0476816	0.000733239	-0.0840965	0.000564849	-0.0530946	-0.000715742	-0.0444865
2018-06-19T01:39:00	0.0513562	-0.00128556	0.043601	-0.000119561	0.0432727	-0.00368335	0.0514761	-0.000171318	0.0791888	-0.00188127	0.0340657	7.70863e-05	0.0694014	0.0013856	0.0523014	0.000255489	0.0563602	0.000303325	0.122927	-0.00125439	0.0764468	0.000459408	0.0855022	0.00188872	0.0294959	-0.00194453	0.0483257	0.000191136	0.0621688	-0.000443446	0.0168441	4.51055e-05	0.0574574	0.00105395	0.082664	0.000576807	0.06115	-0.00140976	-0.0491653	-0.000240687	-0.03264	-0.000286342	-0.0198736	0.000305613	-0.0433121	0.000290913	-0.0204518	-0.000275701	-0.0144063
2018-06-19T01:42:00	0.0496663	-0.00124326	0.0422327	-0.000115809	0.0383711	-0.00326613	0.0498327	-0.000165849	0.0802716	-0.001907	0.0334528	7.56996e-05	0.0655999	0.0013097	0.0493097	0.000240875	0.0537028	0.000289023	0.121729	-0.00124216	0.0737714	0.00044333	0.0838283	0.00185175	0.0257425	-0.00169709	0.0462001	0.000182729	0.0589933	-0.000420796	0.0149042	3.99108e-05	0.0563378	0.00103341	0.0853053	0.000595238	0.0570087	-0.00131429	-0.00975702	-4.77652e-05	-0.000628946	-5.5176e-06	0.00754251	-0.000115987	-0.00187702	1.26073e-05	0.0127644	0.000172071	0.0154207
2018-06-19T01:45:00	0.0454301	-0.00113722	0.0382414	-0.000104864	0.0340568	-0.0028989	0.0470276	-0.000156513	0.079145	-0.00188024	0.0319742	7.23537e-05	0.0592674	0.00118327	0.0458615	0.00022403	0.0499249	0.00026869	0.117805	-0.00120212	0.0690003	0.000414658	0.0796613	0.0017597	0.0213172	-0.00140535	0.0428288	0.000169395	0.0542081	-0.000386663	0.012481	3.34218e-05	0.0533978	0.000979481	0.0845368	0.000589875	0.0504472	-0.00116302	0.0289139	0.000141547	0.0301969	0.00026491	0.0349006	-0.000536695	0.0387758	-0.000260445	0.0438474	0.000591085	0.0455368
2018-06-19T01:48:00	0.0388168	-0.000971672	0.0340217	-9.3293e-05	0.0283603	-0.00241401	0.0426343	-0.000141892	0.0777992	-0.00184826	0.0286211	6.4766e-05	0.0501017	0.00100028	0.0421768	0.000206031	0.0445976	0.000240019	0.112353	-0.00114648	0.0598658	0.000359764	0.0745317	0.00164639	0.0155895	-0.00102775	0.0374917	0.000148286	0.047798	-0.00034094	0.00881929	2.36164e-05	0.0479334	0.000879248	0.080356	0.000560703	0.04116	-0.000948912	0.0664451	0.00032528	0.0605494	0.000531185	0.0600861	-0.000923994	0.0788032	-0.000529295	0.0745085	0.00100441	0.0748592
2018-06-19T01:51:00	0.0310387	-0.000776969	0.0277267	-7.60311e-05	0.0223602	-0.00190329	0.0358676	-0.000119371	0.0740818	-0.00175995	0.0251638	5.69426e-05	0.0390306	0.000779244	0.0362666	0.00017716	0.0373396	0.000200958	0.103085	-0.00105191	0.046873	0.000281684	0.0664995	0.00146896	0.00890515	-0.000587077	0.029993	0.000118627	0.0391437	-0.000279209	0.00382516	1.02431e-05	0.0398813	0.000731546	0.0728223	0.000508135	0.0342904	-0.000790539	0.103157	0.000505004	0.090062	0.000790091	0.0839604	-0.00129113	0.117331	-0.000788076	0.104818	0.001413	0.102574
2018-06-19T01:54:00	0.0213427	-0.000534255	0.0194207	-5.32548e-05	0.0130969	-0.0011148	0.0282726	-9.40943e-05	0.0693473	-0.00164747	0.020457	4.62916e-05	0.0253303	0.000505719	0.0288853	0.000141103	0.027532	0.000148174	0.0920863	-0.000939678	0.0305416	0.00018354	0.0561835	0.00124108	0.000549085	-3.61987e-05	0.0199323	7.88357e-05	0.0282826	-0.000201738	-0.00125728	-3.3668e-06	0.0311824	0.000571981	0.0612007	0.000427042	0.0240398	-0.00055422	0.136843	0.000669911	0.118714	0.00104145	0.106664	-0.00164026	0.153554	-0.00103137	0.132019	0.00177968	0.127652
2018-06-19T01:57:00	0.00942894	-0.000236028	0.0134363	-3.68445e-05	0.00159908	-0.000136113	0.0181322	-6.03459e-05	0.0639046	-0.00151817	0.0146202	3.30837e-05	0.0092945	0.000185564	0.0195011	9.52618e-05	0.0159607	8.58987e-05	0.0778318	-0.000794221	0.0112942	6.78729e-05	0.0433662	0.000957948	-0.00994306	0.000655502	0.0075784	2.99738e-05	0.0160259	-0.000114312	-0.00689374	-1.84602e-05	0.0192349	0.000352827	0.0448873	0.000313211	0.0110035	-0.000253678	0.167655	0.000820751	0.143953	0.00126286	0.127037	-0.00195356	0.187486	-0.00125928	0.156421	0.00210863	0.150981
2018-06-19T02:00:00	-0.00414563	0.000103775	0.00477935	-1.31058e-05	-0.0130141	0.00110776	0.00687334	-2.28752e-05	0.0555965	-0.0013208	0.00641744	1.45219e-05	-0.00966018	-0.000192865	0.00761227	3.71854e-05	0.00181483	9.7672e-06	0.0603732	-0.000616068	-0.0108266	-6.50625e-05	0.0290547	0.00064181	-0.0208233	0.00137279	-0.00690911	-2.73267e-05	0.00143353	-1.02253e-05	-0.0139607	-3.73843e-05	0.00534254	9.79987e-05	0.0243716	0.000170059	-0.00821338	0.000189353	0.196327	0.000961115	0.166669	0.00146214	0.146279	-0.00224945	0.218751	-0.00146928	0.178499	0.00240626	0.170953
2018-06-19T02:03:00	-0.0198606	0.000497156	-0.00609577	1.67156e-05	-0.0301527	0.00256658	-0.00677117	2.25352e-05	0.047526	-0.00112907	-0.0021419	-4.8468e-06	-0.0324925	-0.000648712	-0.00619565	-3.02653e-05	-0.0126547	-6.81062e-05	0.0391518	-0.000399517	-0.0348937	-0.000209694	0.0119121	0.000263134	-0.0327375	0.00215824	-0.0241437	-9.54922e-05	-0.0158041	0.00011273	-0.0210534	-5.63771e-05	-0.0105432	-0.000193396	-0.00138835	-9.6875e-06	-0.0245551	0.000566098	0.221277	0.00108325	0.18689	0.00163953	0.161814	-0.00248834	0.245899	-0.00165162	0.197815	0.00266664	0.188082
2018-06-19T02:06:00	0.000657254	-1.64525e-05	0.0155342	-4.25974e-05	-0.00784343	0.00066763	0.00861328	-2.86659e-05	0.0591515	-0.00140525	0.00835585	1.89082e-05	-0.00639823	-0.00012774	0.00990786	4.83993e-05	0.00907631	4.88477e-05	0.0466219	-0.000475745	-0.00666755	-4.00687e-05	0.0294909	0.000651445	-0.0182373	0.0012023	0.000999251	3.9522e-06	0.0122942	-8.7694e-05	-0.00759066	-2.03264e-05	0.00815912	0.000149664	0.0300338	0.000209568	0.000231518	-5.3375e-06	0.242263	0.00118599	0.203509	0.00178533	0.174148	-0.00267802	0.270016	-0.00181361	0.212383	0.00286303	0.201472
2018-06-19T02:09:00	-0.00301267	7.5414e-05	0.0125543	-3.4426e-05	-0.0109525	0.000932269	0.00382771	-1.2739e-05	0.0535954	-0.00127326	0.00587724	1.32995e-05	-0.0128452	-0.000256454	0.00438435	2.14173e-05	0.00345655	1.86028e-05	0.0393866	-0.000401914	-0.012246	-7.35924e-05	0.0234538	0.000518088	-0.023957	0.00157937	-0.00342285	-1.35379e-05	0.00697771	-4.97716e-05	-0.0102508	-2.74497e-05	0.00489835	8.98509e-05	0.0243501	0.000169909	-0.00423759	9.76942e-05	0.258029	0.00126318	0.21578	0.00189299	0.182867	-0.0028121	0.289444	-0.0019441	0.223824	0.00301726	0.212531
2018-06-19T02:12:00	-0.00951222	0.000238113	0.00681021	-1.86747e-05	-0.0174872	0.00148851	-0.00176572	5.8765e-06	0.046846	-0.00111291	0.00227989	5.1591e-06	-0.0221076	-0.000441377	-0.00161913	-7.9093e-06	-0.00309163	-1.66388e-05	0.0292762	-0.000298743	-0.022125	-0.00013296	0.0153997	0.000340174	-0.0306104	0.00201801	-0.0108833	-4.30453e-05	-0.00110314	7.8687e-06	-0.0136728	-3.66132e-05	-0.00126589	-2.32204e-05	0.0124546	8.69051e-05	-0.0116376	0.000268295	0.269148	0.00131761	0.223709	0.00196254	0.187462	-0.00288275	0.302989	-0.00203508	0.231794	0.0031247	0.21926
2018-06-19T02:15:00	-0.0171807	0.000430072	-0.00104214	2.8577e-06	-0.024255	0.00206457	-0.00831568	2.76755e-05	0.039339	-0.000934569	-0.00240724	-5.4473e-06	-0.0340068	-0.000678945	-0.00949076	-4.63618e-05	-0.00991613	-5.33675e-05	0.0171495	-0.000174999	-0.0344333	-0.000206928	0.00558948	0.00012347	-0.0369459	0.00243568	-0.0192716	-7.62224e-05	-0.00998176	7.11993e-05	-0.0169044	-4.5267e-05	-0.00843843	-0.000154787	-0.0052438	-3.65898e-05	-0.0204237	0.000470853	0.273638	0.00133959	0.227796	0.00199839	0.187132	-0.00287768	0.31059	-0.00208613	0.234239	0.00315766	0.221621
2018-06-19T02:18:00	-0.0253684	0.00063503	-0.0113847	3.12186e-05	-0.0324701	0.00276384	-0.0161723	5.38232e-05	0.0302616	-0.000718921	-0.0072922	-1.65013e-05	-0.0457497	-0.00091339	-0.0173772	-8.48863e-05	-0.0186097	-0.000100155	0.00399145	-4.07301e-05	-0.048599	-0.000292057	-0.00537736	-0.000118785	-0.0439435	0.002897	-0.0279904	-0.000110707	-0.019891	0.000141881	-0.0202998	-5.43591e-05	-0.0181339	-0.000332632	-0.0280471	-0.000195705	-0.0290344	0.000669366	0.271724	0.00133022	0.225153	0.00197521	0.183148	-0.00281641	0.31114	-0.00208983	0.232843	0.00313884	0.219887
2018-06-19T02:21:00	0.0014282	-3.57511e-05	0.0108198	-2.96698e-05	-0.00363346	0.000309279	0.00496564	-1.65262e-05	0.0441216	-0.00104819	0.00635672	1.43845e-05	-0.0101263	-0.000202172	0.00337704	1.64966e-05	0.00877306	4.72156e-05	0.0198174	-0.000202224	-0.00894499	-5.3755e-05	0.0185046	0.000408762	-0.0230794	0.00152152	0.00226674	8.9653e-06	0.0164486	-0.000117327	-0.00190574	-5.1032e-06	0.00659015	0.000120884	0.000851266	5.9399e-06	-0.000503281	1.16027e-05	0.262639	0.00128574	0.216971	0.00190343	0.173426	-0.00266692	0.304352	-0.00204423	0.224161	0.0030218	0.210988
2018-06-19T02:24:00	0.00500537	-0.000125296	0.0108398	-2.97245e-05	0.000384451	-3.27243e-05	0.00684804	-2.2791e-05	0.0410846	-0.000976041	0.0061349	1.38825e-05	-0.00345121	-6.89032e-05	0.00405749	1.98206e-05	0.0112341	6.04604e-05	0.0197448	-0.000201482	-0.00280452	-1.68538e-05	0.0175241	0.000387103	-0.0217964	0.00143694	0.00405731	1.60473e-05	0.020081	-0.000143237	0.000641104	1.7168e-06	0.0105265	0.00019309	0.00303693	2.11909e-05	0.00106696	-2.4598e-05	0.246088	0.00120472	0.202333	0.00177501	0.159476	-0.00245239	0.289114	-0.00194188	0.209381	0.00282256	0.197346
2018-06-19T02:27:00	0.00677676	-0.000169638	0.00768702	-2.1079e-05	0.00259482	-0.00022087	0.00734021	-2.4429e-05	0.0358933	-0.000852712	0.00494792	1.11965e-05	-0.00038089	-7.6045e-06	0.00419755	2.05048e-05	0.0130646	7.03121e-05	0.0177768	-0.0001814	3.39491e-05	2.04e-07	0.0167573	0.000370165	-0.0214013	0.00141089	0.00476394	1.88421e-05	0.0227071	-0.000161968	0.00251409	6.7323e-06	0.0120667	0.000221341	0.00335009	2.3376e-05	0.00197971	-4.56407e-05	0.22149	0.0010843	0.180616	0.0015845	0.138854	-0.00213527	0.266119	-0.00178743	0.186546	0.00251474	0.174947
2018-06-19T02:30:00	0.00828014	-0.000207271	0.00512794	-1.40616e-05	0.00595376	-0.000506782	0.00843087	-2.80589e-05	0.0317172	-0.000753499	0.0051576	1.1671e-05	0.00143049	2.85597e-05	0.00415056	2.02752e-05	0.0145168	7.81281e-05	0.0158935	-0.000162182	0.00197517	1.18698e-05	0.0146459	0.000323523	-0.0201129	0.00132595	0.00514588	2.03528e-05	0.0253397	-0.000180747	0.00517528	1.38585e-05	0.0149549	0.00027432	0.00402168	2.80622e-05	0.00542181	-0.000124996	0.187018	0.000915539	0.151413	0.00132831	0.112309	-0.00172707	0.233777	-0.0015702	0.156762	0.00211323	0.146717
2018-06-19T02:33:00	0.00855319	-0.000214106	0.00169524	-4.6486e-06	0.00875486	-0.000745211	0.00875113	-2.91247e-05	0.0265353	-0.000630395	0.0047187	1.06778e-05	0.00336693	6.72206e-05	0.00306467	1.49707e-05	0.0156506	8.423e-05	0.0139972	-0.000142832	0.00335834	2.0182e-05	0.012234	0.000270245	-0.0182108	0.00120055	0.00628537	2.48597e-05	0.02774	-0.000197868	0.00601089	1.60961e-05	0.0174465	0.000320022	0.00470457	3.28272e-05	0.00565031	-0.000130263	0.142193	0.000696104	0.11438	0.00100343	0.0791872	-0.00121773	0.192104	-0.0012903	0.119467	0.00161047	0.110486
2018-06-19T02:36:00	0.0093569	-0.000234225	-0.00187833	5.1507e-06	0.0113172	-0.000963312	0.00901138	-2.99909e-05	0.0268424	-0.000637689	0.00515512	1.16654e-05	0.00527962	0.000105407	0.000339038	1.6562e-06	0.015483	8.33276e-05	0.0144016	-0.000146959	0.00290145	1.74363e-05	0.0227169	0.00050181	-0.0162693	0.00107256	0.00699436	2.76638e-05	0.0244674	-0.000174525	0.00886067	2.37273e-05	0.0200885	0.000368485	0.0062166	4.33778e-05	0.00766353	-0.000176676	0.0868887	0.000425361	0.0684836	0.000600789	0.037976	-0.000583987	0.138958	-0.000933336	0.0740167	0.000997783	0.0737697
2018-06-19T02:39:00	0.00939861	-0.000235268	-0.00629355	1.72579e-05	0.0120825	-0.00102845	0.0096147	-3.19988e-05	0.0219756	-0.00052207	0.00392635	8.8848e-06	0.0079144	0.000158011	-0.00010903	-5.326e-07	0.0148104	7.97077e-05	0.0127545	-0.000130151	0.00268578	1.61403e-05	0.0225091	0.000497221	-0.0120385	0.000793642	0.0075171	2.97314e-05	0.024483	-0.000174636	0.010125	2.71128e-05	0.0227526	0.000417354	0.00716036	4.99631e-05	0.0102515	-0.000236339	0.17889	0.000875751	0.16045	0.00140759	0.11679	-0.00179598	0.223667	-0.0015023	0.164586	0.00221871	0.146306
2018-06-19T02:42:00	0.00966798	-0.000242011	-0.0099802	2.73673e-05	0.012426	-0.0010577	0.00980338	-3.26267e-05	0.0175747	-0.00041752	0.0048969	1.10811e-05	0.0097059	0.000193778	-9.6113e-05	-4.695e-07	0.0154945	8.33898e-05	0.0117889	-0.000120298	0.00277874	1.66989e-05	0.0211437	0.000467058	-0.00986256	0.000650194	0.00823051	3.2553e-05	0.0246137	-0.000175568	0.0113828	3.04811e-05	0.0243829	0.000447257	0.00719989	5.02389e-05	0.0129318	-0.000298132	0.167461	0.000819799	0.151997	0.00133343	0.108823	-0.00167347	0.212909	-0.00143004	0.153928	0.00207502	0.136874
2018-06-19T02:45:00	0.0101564	-0.000254238	-0.0127782	3.50398e-05	0.0131896	-0.0011227	0.010044	-3.34277e-05	0.0147805	-0.000351137	0.00455337	1.03037e-05	0.011098	0.000221572	0.000850768	4.1559e-06	0.0165219	8.89188e-05	0.0109257	-0.00011149	0.00250272	1.50401e-05	0.0205248	0.000453388	-0.00729669	0.000481038	0.00887736	3.51114e-05	0.0251005	-0.00017904	0.0135184	3.61997e-05	0.0260975	0.000478709	0.0075929	5.29812e-05	0.0116896	-0.000269495	0.147182	0.000720524	0.135291	0.00118687	0.0930262	-0.00143054	0.192867	-0.00129543	0.135943	0.00183258	0.120282
2018-06-19T02:48:00	0.00954076	-0.000238827	-0.0162864	4.46598e-05	0.0142153	-0.00121	0.0105847	-3.52271e-05	0.0102159	-0.000242698	0.00428613	9.699e-06	0.012062	0.000240818	0.00182397	8.91e-06	0.0171629	9.23689e-05	0.0100072	-0.000102117	0.00337329	2.02718e-05	0.020416	0.000450985	-0.00586915	0.000386927	0.0110313	4.36305e-05	0.0253591	-0.000180885	0.0143704	3.84813e-05	0.0259443	0.000475898	0.00891374	6.21977e-05	0.0129892	-0.000299456	0.122491	0.000599652	0.113241	0.000993436	0.073993	-0.00113785	0.167389	-0.0011243	0.112279	0.00151357	0.100082
2018-06-19T02:51:00	0.00901579	-0.000225686	-0.0187791	5.14952e-05	0.0154476	-0.00131489	0.0105675	-3.51697e-05	0.00677602	-0.000160977	0.00573165	1.297e-05	0.0124126	0.000247818	0.00336542	1.64398e-05	0.0177285	9.5413e-05	0.00910804	-9.29414e-05	0.00315645	1.89687e-05	0.0198681	0.000438881	-0.00360915	0.000237935	0.013416	5.30624e-05	0.0255917	-0.000182544	0.0148864	3.9863e-05	0.0256663	0.000470799	0.00999201	6.97216e-05	0.0156728	-0.000361325	0.0915403	0.000448133	0.0857278	0.000752068	0.050682	-0.000779379	0.137478	-0.000923392	0.0841184	0.00113396	0.0773049
2018-06-19T02:54:00	0.0088469	-0.000221458	-0.0209443	5.74327e-05	0.0142385	-0.00121197	0.0104828	-3.48879e-05	0.00369417	-8.77618e-05	0.00599464	1.35651e-05	0.0125608	0.000250776	0.00492704	2.40683e-05	0.0172942	9.30755e-05	0.00835968	-8.53049e-05	0.00258462	1.55323e-05	0.0189799	0.000419262	-0.00132326	8.72368e-05	0.0153388	6.06674e-05	0.025426	-0.000181362	0.0153118	4.10023e-05	0.0250726	0.000459909	0.00996857	6.9558e-05	0.0178532	-0.000411591	0.0567692	0.000277912	0.0533409	0.000467946	0.0247191	-0.000380125	0.100152	-0.000672686	0.0520229	0.000701295	0.0496708
2018-06-19T02:57:00	0.00846211	-0.000211826	-0.0229262	6.28674e-05	0.0140849	-0.0011989	0.0100874	-3.35721e-05	0.000714123	-1.69653e-05	0.0066975	1.51556e-05	0.0136409	0.000272339	0.00621382	3.03541e-05	0.0169974	9.14783e-05	0.00797495	-8.1379e-05	0.00269667	1.62057e-05	0.0184335	0.000407192	0.000745738	-4.91632e-05	0.0150013	5.93326e-05	0.0248735	-0.000177421	0.0155777	4.17142e-05	0.0247454	0.000453908	0.0102819	7.17443e-05	0.0177368	-0.000408908	0.0164259	8.04127e-05	0.0161279	0.000141486	-0.0056116	8.62942e-05	0.0579535	-0.000389255	0.0145028	0.000195505	0.0180654
2018-06-19T03:00:00	0.00848068	-0.000212291	-0.0257749	7.0679e-05	0.0141279	-0.00120257	0.00964334	-3.20941e-05	-0.00204695	4.86291e-05	0.00620799	1.40479e-05	0.0136064	0.000271652	0.00756292	3.69444e-05	0.0164765	8.86747e-05	0.00750931	-7.66274e-05	0.00243441	1.46296e-05	0.017662	0.000390148	0.00257026	-0.000169446	0.0156916	6.20628e-05	0.0250417	-0.000178621	0.0159168	4.26223e-05	0.0241357	0.000442723	0.0107844	7.52505e-05	0.0208694	-0.000481127	-0.0291599	-0.000142751	-0.0273947	-0.000240326	-0.0404594	0.000622177	0.00870712	-5.84828e-05	-0.0280571	-0.000378224	-0.01827
2018-06-19T03:03:00	0.00914508	-0.000228922	-0.0275674	7.55942e-05	0.013391	-0.00113984	0.00955863	-3.18122e-05	-0.00237598	5.64458e-05	0.00652457	1.47643e-05	0.0145341	0.000290173	0.00715652	3.49591e-05	0.0161867	8.71149e-05	0.00630777	-6.43665e-05	0.0021759	1.30761e-05	0.0168241	0.000371639	0.00516088	-0.000340234	0.0145951	5.77261e-05	0.0250289	-0.00017853	0.0156998	4.20411e-05	0.0237322	0.000435322	0.0112597	7.8567e-05	0.0270856	-0.000624437	-0.0809596	-0.000396335	-0.0765439	-0.0006715	-0.0797693	0.00122668	-0.0478943	0.000321691	-0.0752747	-0.00101474	-0.0600094
2018-06-19T03:06:00	0.0075014	-0.000187777	-0.0291967	8.0062e-05	0.0132099	-0.00112442	0.00993932	-3.30791e-05	-0.00751031	0.000178421	0.00832501	1.88385e-05	0.0142044	0.000283591	0.00726986	3.55128e-05	0.0172037	9.25883e-05	0.00520356	-5.30988e-05	0.00400863	2.40899e-05	0.0162008	0.000357872	0.00900051	-0.000593363	0.0151534	5.99343e-05	0.021576	-0.000153901	0.0164908	4.41594e-05	0.0250187	0.00045892	0.0115165	8.03591e-05	0.0256202	-0.000590654	0.00719607	3.52281e-05	0.00512207	4.49346e-05	-0.00921754	0.000141746	0.0252849	-0.00016983	0.0069498	9.36869e-05	0.00468865
2018-06-19T03:09:00	0.00749144	-0.000187528	-0.0318955	8.74627e-05	0.0125208	-0.00106577	0.00998636	-3.32357e-05	-0.00873662	0.000207554	0.00989344	2.23876e-05	0.0148613	0.000296705	0.00817184	3.99189e-05	0.0171229	9.21538e-05	0.00386244	-3.94136e-05	0.00372427	2.2381e-05	0.0158365	0.000349824	0.0114227	-0.000753048	0.0161745	6.3973e-05	0.019697	-0.000140497	0.0153279	4.10453e-05	0.0261417	0.000479521	0.0115973	8.09226e-05	0.0274909	-0.000633782	-0.0113327	-5.54788e-05	-0.0127883	-0.000112188	-0.0218284	0.000335673	0.00478581	-3.21447e-05	-0.0093214	-0.000125657	-0.00987347
2018-06-19T03:12:00	0.00641818	-0.000160661	-0.0338806	9.2906e-05	0.0138119	-0.00117567	0.0108975	-3.62681e-05	-0.00893855	0.000212352	0.0114377	2.5882e-05	0.0144838	0.000289169	0.00775993	3.79067e-05	0.0172504	9.28398e-05	0.00295942	-3.01989e-05	0.0034797	2.09113e-05	0.014449	0.000319175	0.0131047	-0.000863933	0.0172788	6.83404e-05	0.0181719	-0.000129619	0.0147502	3.94984e-05	0.0245258	0.00044988	0.0130196	9.08472e-05	0.0228998	-0.000527936	-0.0388354	-0.000190118	-0.0363003	-0.000318453	-0.041391	0.000636503	-0.0234307	0.000157376	-0.0333867	-0.000450069	-0.029702
2018-06-19T03:15:00	0.00509715	-0.000127593	-0.0360264	9.87901e-05	0.0144191	-0.00122735	0.0115898	-3.85723e-05	-0.00771981	0.000183398	0.0121072	2.73971e-05	0.0137885	0.000275286	0.00860193	4.20199e-05	0.0177724	9.5649e-05	0.00194658	-1.98635e-05	0.00379723	2.28195e-05	0.0122076	0.000269663	0.0141867	-0.000935264	0.0168662	6.67084e-05	0.0169313	-0.00012077	0.0136098	3.64444e-05	0.0241077	0.00044221	0.013216	9.22175e-05	0.0203948	-0.000470185	-0.0690321	-0.000337945	-0.0637261	-0.000559053	-0.0626747	0.0009638	-0.0548934	0.000368701	-0.0616046	-0.000830461	-0.0530358
2018-06-19T03:18:00	0.00455205	-0.000113948	-0.0377355	0.000103477	0.0148053	-0.00126022	0.0115772	-3.85301e-05	-0.00558986	0.000132797	0.0124068	2.80751e-05	0.0132087	0.000263711	0.0091342	4.46199e-05	0.0177236	9.53864e-05	0.00203385	-2.07541e-05	0.00377275	2.26724e-05	0.0110166	0.000243354	0.0165367	-0.00109019	0.0169078	6.6873e-05	0.0158019	-0.000112714	0.0126507	3.38761e-05	0.0240455	0.000441068	0.0135608	9.46234e-05	0.0207731	-0.000478908	-0.103212	-0.000505272	-0.094587	-0.000829787	-0.0867244	0.00133363	-0.090569	0.000608322	-0.0926773	-0.00124934	-0.0781036
2018-06-19T03:21:00	0.00459126	-0.00011493	-0.0367026	0.000100644	0.0126518	-0.00107691	0.0113247	-3.76898e-05	-0.00220332	5.23439e-05	0.0119476	2.70358e-05	0.0139553	0.000278617	0.00993774	4.85452e-05	0.0168804	9.08486e-05	0.00280115	-2.85839e-05	0.0046829	2.81419e-05	0.0100498	0.000221997	0.0217824	-0.00143602	0.0159746	6.31821e-05	0.0135547	-9.66846e-05	0.0114326	3.06144e-05	0.0216348	0.000396849	0.0141895	9.90108e-05	0.0204509	-0.000471479	0.00568567	2.7834e-05	0.00837162	7.3442e-05	-0.0113651	0.00017477	0.00429024	-2.88161e-05	0.00706474	9.52363e-05	0.00653325
2018-06-19T03:24:00	0.00345077	-8.63805e-05	-0.0377098	0.000103406	0.00993126	-0.000845345	0.0107106	-3.56459e-05	2.8779e-05	-6.837e-07	0.0117554	2.66009e-05	0.012984	0.000259224	0.0106049	5.18041e-05	0.0167735	9.02731e-05	0.00306505	-3.12768e-05	0.00453114	2.723e-05	0.00766676	0.000169357	0.0237749	-0.00156737	0.0141896	5.61222e-05	0.0113661	-8.1074e-05	0.010385	2.78092e-05	0.0204478	0.000375076	0.012746	8.89384e-05	0.0195953	-0.000451755	0.00979627	4.79574e-05	0.0126824	0.000111259	-0.00663041	0.000101961	0.00642741	-4.31708e-05	0.0103607	0.000139668	0.0122142
2018-06-19T03:27:00	0.00235684	-5.89972e-05	-0.0384697	0.00010549	0.00823959	-0.000701351	0.0108128	-3.59862e-05	0.00249549	-5.9285e-05	0.0117921	2.6684e-05	0.0117188	0.000233966	0.0109599	5.35384e-05	0.0164123	8.8329e-05	0.00357066	-3.64361e-05	0.00408602	2.4555e-05	0.00575632	0.000127156	0.0256391	-0.00169027	0.014618	5.78167e-05	0.0106756	-7.61487e-05	0.00804247	2.15363e-05	0.0199403	0.000365767	0.0111521	7.78166e-05	0.0191653	-0.000441842	0.00964746	4.72289e-05	0.0125953	0.000110495	-0.00719776	0.000110686	0.00350043	-2.35113e-05	0.00983802	0.000132621	0.0124208
2018-06-19T03:30:00	0.00254872	-6.38004e-05	-0.03845	0.000105436	0.00745713	-0.000634748	0.0109065	-3.62982e-05	0.00313447	-7.44652e-05	0.0111242	2.51727e-05	0.0106736	0.000213097	0.0120393	5.88114e-05	0.015114	8.1342e-05	0.00425196	-4.33884e-05	0.00397789	2.39052e-05	0.00317161	7.006e-05	0.027199	-0.00179311	0.0146751	5.80425e-05	0.00894546	-6.38075e-05	0.00599113	1.60431e-05	0.0194842	0.000357401	0.0102726	7.16795e-05	0.0189924	-0.000437856	0.00956782	4.6839e-05	0.0123859	0.000108658	-0.0079489	0.000122237	0.00115852	-7.7814e-06	0.00904735	0.000121963	0.0134185
2018-06-19T03:33:00	0.00166754	-4.17423e-05	-0.0381928	0.000104731	0.00678835	-0.000577822	0.0109505	-3.64446e-05	0.00265965	-6.31849e-05	0.011973	2.70934e-05	0.00995464	0.000198744	0.0111388	5.44123e-05	0.014928	8.0341e-05	0.00527341	-5.38115e-05	0.00346639	2.08313e-05	9.03907e-05	1.9967e-06	0.0277223	-0.0018276	0.0154791	6.12225e-05	0.00739679	-5.27608e-05	0.00337077	9.0263e-06	0.0199648	0.000366216	0.0090626	6.32364e-05	0.0147384	-0.000339781	0.00979227	4.79378e-05	0.0115449	0.00010128	-0.0079069	0.000121591	-0.00205077	1.37744e-05	0.00849844	0.000114563	0.0127761
2018-06-19T03:36:00	0.00100455	-2.51463e-05	-0.0376082	0.000103128	0.00740431	-0.000630252	0.0112935	-3.7586e-05	0.00436816	-0.000103774	0.0131768	2.98175e-05	0.00952436	0.000190153	0.00906	4.42575e-05	0.0132693	7.14137e-05	0.00369637	-3.77189e-05	0.00211465	1.2708e-05	0.0101468	0.000224139	0.0281891	-0.00185838	0.0161702	6.39559e-05	0.00366713	-2.61574e-05	0.0051792	1.3869e-05	0.0198509	0.000364127	0.00941985	6.57292e-05	0.0149199	-0.000343966	0.00882535	4.32043e-05	0.01118	9.80793e-05	-0.00865999	0.000133172	-0.00390549	2.62319e-05	0.00910627	0.000122757	0.0108689
2018-06-19T03:39:00	0.00214164	-5.36101e-05	-0.0366194	0.000100416	0.00330243	-0.000281101	0.0112134	-3.73193e-05	0.00466941	-0.000110931	0.0131555	2.97692e-05	0.0099542	0.000198735	0.0082546	4.03232e-05	0.0123493	6.64623e-05	0.00353087	-3.60302e-05	0.00274703	1.65083e-05	0.0105097	0.000232156	0.0284796	-0.00187753	0.0157063	6.2121e-05	0.00165494	-1.18046e-05	0.0040112	1.07413e-05	0.0188252	0.000345313	0.0110739	7.72707e-05	0.013639	-0.000314436	0.00791034	3.87248e-05	0.0109337	9.5919e-05	-0.00827128	0.000127194	0.00280603	-1.88472e-05	0.00935116	0.000126058	0.0114277
2018-06-19T03:42:00	0.00177318	-4.43867e-05	-0.0346696	9.50696e-05	0.00304263	-0.000258988	0.0113353	-3.7725e-05	0.00525837	-0.000124922	0.0120497	2.72669e-05	0.010193	0.000203502	0.00818811	3.99984e-05	0.011691	6.29196e-05	0.00337416	-3.44311e-05	0.00326391	1.96145e-05	0.00986741	0.000217969	0.0285307	-0.0018809	0.0147121	5.81887e-05	0.000464394	-3.3125e-06	0.00367211	9.8332e-06	0.0171636	0.000314833	0.0122088	8.51899e-05	0.0135661	-0.000312756	0.00753392	3.68821e-05	0.0112806	9.89615e-05	-0.00821503	0.000126329	0.00251651	-1.69026e-05	0.00901528	0.000121531	0.011013
2018-06-19T03:45:00	0.00123519	-3.09196e-05	-0.0330178	9.05403e-05	0.00239546	-0.0002039	0.0116586	-3.8801e-05	0.004768	-0.000113273	0.0119828	2.71156e-05	0.0102499	0.000204638	0.00832239	4.06543e-05	0.0112478	6.05344e-05	0.00277464	-2.83133e-05	0.00442016	2.6563e-05	0.0099768	0.000220385	0.0277932	-0.00183228	0.0149433	5.91033e-05	-0.000747663	5.333e-06	0.00339316	9.0863e-06	0.0157134	0.000288233	0.012825	8.94893e-05	0.0130971	-0.000301943	0.00767771	3.7586e-05	0.0110679	9.70962e-05	-0.00705279	0.000108457	0.00227516	-1.52815e-05	0.0075835	0.000102229	0.0104113
2018-06-19T03:48:00	0.00101519	-2.54125e-05	-0.0305778	8.38492e-05	0.00191649	-0.000163131	0.0118754	-3.95227e-05	0.00547569	-0.000130085	0.0124797	2.824e-05	0.0102337	0.000204314	0.00899959	4.39624e-05	0.0121384	6.53275e-05	0.00291129	-2.97078e-05	0.00579174	3.48055e-05	0.00993398	0.000219439	0.0274768	-0.00181142	0.0133743	5.28973e-05	-0.00144647	1.03176e-05	0.00348707	9.3377e-06	0.0161211	0.000295711	0.0134817	9.40719e-05	0.013694	-0.000315704	0.00858849	4.20447e-05	0.0109421	9.59926e-05	-0.00610099	9.382e-05	0.00165032	-1.10846e-05	0.00781029	0.000105287	0.00952244
2018-06-19T03:51:00	0.000518737	-1.29852e-05	-0.0279422	7.66221e-05	0.0022415	-0.000190795	0.0121235	-4.03485e-05	0.00486372	-0.000115547	0.0125513	2.8402e-05	0.0100537	0.000200722	0.00861529	4.20851e-05	0.0121865	6.55865e-05	0.00277483	-2.83153e-05	0.00814029	4.89192e-05	0.00911685	0.000201389	0.026496	-0.00174676	0.0131321	5.19396e-05	-0.00174761	1.24656e-05	0.00365777	9.7948e-06	0.0165545	0.000303661	0.0137156	9.5704e-05	0.0144504	-0.000333142	0.00830435	4.06537e-05	0.0106084	9.30645e-05	-0.00560671	8.6219e-05	0.00127222	-8.5451e-06	0.00797953	0.000107568	0.0105003
2018-06-19T03:54:00	-0.000176861	4.4272e-06	-0.0257631	7.06467e-05	0.00227294	-0.000193472	0.0119258	-3.96902e-05	0.00379672	-9.01981e-05	0.0126371	2.85961e-05	0.00947044	0.000189077	0.0089613	4.37754e-05	0.0113508	6.10886e-05	0.00224652	-2.29242e-05	0.00923238	5.54821e-05	0.00895645	0.000197846	0.0245854	-0.00162081	0.0146736	5.80363e-05	-0.00240936	1.71858e-05	0.00315105	8.4379e-06	0.0174451	0.000319998	0.0151558	0.000105753	0.0148043	-0.0003413	0.00777825	3.80782e-05	0.0114083	0.000100083	-0.00506106	7.78281e-05	0.00192965	-1.29608e-05	0.00766057	0.000103268	0.0101643
2018-06-19T03:57:00	-0.000184169	4.6102e-06	-0.0223822	6.13755e-05	0.00209968	-0.000178724	0.0118375	-3.93966e-05	0.00285569	-6.78422e-05	0.01206	2.72902e-05	0.00794289	0.000158579	0.00717797	3.50639e-05	0.0107356	5.77779e-05	0.0015267	-1.5579e-05	0.0103789	6.2372e-05	0.00850066	0.000187777	0.0222595	-0.00146747	0.0150954	5.97046e-05	-0.00285542	2.03676e-05	0.00200531	5.3699e-06	0.0188442	0.000345661	0.0165101	0.000115203	0.0127366	-0.000293632	0.00740366	3.62444e-05	0.0116986	0.000102628	-0.00405348	6.23337e-05	0.001864	-1.25199e-05	0.0069021	9.30438e-05	0.0104201
2018-06-19T04:00:00	-0.000770895	1.92973e-05	-0.0188514	5.16935e-05	0.00185998	-0.000158321	0.0115146	-3.83218e-05	0.00288985	-6.86537e-05	0.0126264	2.8572e-05	0.00809416	0.0001616	0.00729023	3.56123e-05	0.0102048	5.49212e-05	0.00177896	-1.81531e-05	0.011088	6.66333e-05	0.00759802	0.000167838	0.0197012	-0.00129881	0.0149767	5.92352e-05	-0.00276709	1.97375e-05	0.00179757	4.8136e-06	0.0183319	0.000336264	0.017504	0.000122138	0.00956284	-0.000220464	0.0077589	3.79835e-05	0.0117457	0.000103042	-0.0035848	5.51264e-05	0.0020117	-1.35119e-05	0.00731871	9.86599e-05	0.00972139
2018-06-19T04:03:00	-0.00115251	2.88499e-05	-0.014862	4.07539e-05	0.00129147	-0.000109929	0.0114179	-3.80001e-05	0.00282532	-6.71207e-05	0.0123296	2.79004e-05	0.00899537	0.000179592	0.00701601	3.42727e-05	0.0100099	5.38721e-05	0.00115697	-1.18061e-05	0.01134	6.81481e-05	0.00738565	0.000163147	0.0177559	-0.00117057	0.0141149	5.58269e-05	-0.0019314	1.37766e-05	0.00123482	3.3066e-06	0.018615	0.000341457	0.0179457	0.000125221	0.00775292	-0.000178738	0.0076143	3.72756e-05	0.0117705	0.00010326	-0.0025966	3.99301e-05	0.00187404	-1.25873e-05	0.00695435	9.37481e-05	0.00881225
2018-06-19T04:06:00	-0.000480376	1.20249e-05	-0.0113552	3.11379e-05	0.00223757	-0.000190462	0.0107656	-3.58292e-05	0.00324219	-7.70241e-05	0.0117994	2.67005e-05	0.00958909	0.000191446	0.0058022	2.83434e-05	0.0115517	6.217e-05	0.00202044	-2.06172e-05	0.0119234	7.16537e-05	0.00720479	0.000159152	0.0145376	-0.000958401	0.013039	5.15714e-05	-0.00168922	1.20491e-05	0.00111231	2.9786e-06	0.0129503	0.000237549	0.0176637	0.000123252	0.00896072	-0.000206582	0.00853564	4.1786e-05	0.0118466	0.000103928	-0.00614767	9.45378e-05	0.00214066	-1.43781e-05	0.00467496	6.30208e-05	0.00806367
2018-06-19T04:09:00	-0.00153259	3.83643e-05	-0.00829257	2.27396e-05	0.00380489	-0.00032387	0.0110729	-3.68519e-05	0.00226987	-5.3925e-05	0.0110967	2.51105e-05	0.00916345	0.000182948	0.00391295	1.91145e-05	0.0111545	6.00322e-05	0.00130779	-1.33452e-05	0.0123327	7.41135e-05	0.00705734	0.000155895	0.0109938	-0.000724774	0.011962	4.73118e-05	0.000280033	-1.9975e-06	0.000786187	2.1053e-06	0.0114982	0.000210913	0.0184083	0.000128449	0.0112219	-0.000258713	0.0081098	3.97013e-05	0.0119349	0.000104701	-0.00644219	9.90669e-05	0.00183098	-1.22981e-05	0.00462435	6.23386e-05	0.00724554
2018-06-19T04:12:00	-0.00154461	3.8665e-05	-0.0050137	1.37484e-05	0.00549037	-0.000467338	0.0111917	-3.72474e-05	0.000729647	-1.73341e-05	0.010363	2.34502e-05	0.00823025	0.000164317	0.00427444	2.08804e-05	0.0107714	5.79704e-05	0.000508112	-5.1849e-06	0.0127587	7.66733e-05	0.0068467	0.000151242	0.00808394	-0.000532938	0.0113883	4.50426e-05	0.000208935	-1.4903e-06	0.000823362	2.2048e-06	0.0113728	0.000208612	0.018353	0.000128062	0.00761579	-0.000175576	0.00819547	4.01207e-05	0.0121094	0.000106233	-0.00653584	0.000100507	0.00184143	-1.23683e-05	0.00462349	6.2327e-05	0.00809991
2018-06-19T04:15:00	-0.001636	4.09528e-05	-0.00181892	4.9878e-06	0.00659533	-0.000561392	0.0113593	-3.78049e-05	-9.19747e-05	2.185e-06	0.0109044	2.46753e-05	0.00791782	0.000158079	0.00385349	1.8824e-05	0.0101725	5.47474e-05	0.000595997	-6.0817e-06	0.013358	8.02751e-05	0.00656667	0.000145056	0.00578526	-0.000381396	0.00993016	3.92754e-05	0.000521548	-3.7202e-06	0.000506523	1.3564e-06	0.0108994	0.00019993	0.0170228	0.000118781	0.00853643	-0.000196801	0.00799227	3.91259e-05	0.0121521	0.000106607	-0.00658462	0.000101257	0.00189316	-1.27157e-05	0.0037997	5.12219e-05	0.00755553
2018-06-19T04:18:00	-0.0025106	6.28459e-05	0.00160229	-4.3937e-06	0.00787337	-0.000670178	0.0113207	-3.76767e-05	-0.000553824	1.31571e-05	0.0110323	2.49647e-05	0.0067692	0.000135147	0.0051075	2.49498e-05	0.00952779	5.12775e-05	0.000514543	-5.2506e-06	0.0139186	8.36441e-05	0.00626725	0.000138442	0.00335014	-0.00022086	0.00972774	3.84748e-05	-3.56366e-05	2.542e-07	0.00017915	4.797e-07	0.00966249	0.00017724	0.0167996	0.000117223	0.00797802	-0.000183927	0.00763138	3.73592e-05	0.0121571	0.000106651	-0.00603077	9.27401e-05	0.00195809	-1.31519e-05	0.00364092	4.90814e-05	0.0071559
2018-06-19T04:21:00	-0.00207375	5.19106e-05	0.00416879	-1.14315e-05	0.00823643	-0.000701082	0.0111455	-3.70934e-05	-0.00121994	2.8982e-05	0.00805947	1.82376e-05	0.00769286	0.000153588	0.005157	2.51916e-05	0.0106574	5.73569e-05	0.000217555	-2.22e-06	0.00865549	5.20152e-05	0.00598861	0.000132287	0.000552658	-3.64342e-05	0.00920098	3.63914e-05	-0.000413615	2.9503e-06	0.000943254	2.5259e-06	0.0166673	0.00030573	0.0170127	0.00011871	0.00610796	-0.000140814	0.0066105	3.23615e-05	0.0135179	0.000118589	-0.00689625	0.000106049	0.00269973	-1.81332e-05	0.00367683	4.95655e-05	0.0080126
2018-06-19T04:24:00	-0.00247435	6.19387e-05	0.00799204	-2.19155e-05	0.00854253	-0.000727137	0.0108822	-3.62172e-05	-0.00295256	7.01435e-05	0.00762959	1.72648e-05	0.00704178	0.000140589	0.00583831	2.85197e-05	0.0100132	5.38898e-05	0.000260118	-2.6543e-06	0.00899921	5.40808e-05	0.0055354	0.000122276	-0.000962594	6.34595e-05	0.00729482	2.88522e-05	-0.000422358	3.0127e-06	0.00132915	3.5592e-06	0.0171778	0.000315094	0.0182001	0.000126996	0.00557754	-0.000128586	0.00571506	2.79779e-05	0.0134819	0.000118273	-0.00699008	0.000107492	0.00272787	-1.83222e-05	0.00389087	5.24509e-05	0.00850446
2018-06-19T04:27:00	-0.00227571	5.69661e-05	0.0105082	-2.88152e-05	0.00891788	-0.000759086	0.010181	-3.38834e-05	-0.00405994	9.64514e-05	0.00727584	1.64643e-05	0.0064557	0.000128888	0.00560143	2.73626e-05	0.00844361	4.54426e-05	-0.000195348	1.9934e-06	0.00951806	5.71989e-05	0.00518773	0.000114596	-0.00250264	0.000164988	0.00625451	2.47376e-05	-0.000677899	4.8354e-06	0.00124006	3.3207e-06	0.0176455	0.000323673	0.0176638	0.000123253	0.00207525	-4.78433e-05	0.00575942	2.81951e-05	0.013293	0.000116616	-0.00690351	0.000106161	0.00310546	-2.08583e-05	0.00325694	4.39052e-05	0.00813465
2018-06-19T04:30:00	-0.00215563	5.39604e-05	0.0131037	-3.59325e-05	0.00944899	-0.000804294	0.0100433	-3.34253e-05	-0.00622137	0.0001478	0.00582336	1.31775e-05	0.0064213	0.000128201	0.0055278	2.70029e-05	0.008225	4.42661e-05	-0.000385181	3.9305e-06	0.00905551	5.44192e-05	0.00508743	0.00011238	-0.00341286	0.000224994	0.00728092	2.87972e-05	-0.00139697	9.9645e-06	0.0015772	4.2234e-06	0.0157276	0.000288493	0.0175996	0.000122805	0.00234707	-5.41097e-05	0.00597209	2.92362e-05	0.0140572	0.00012332	-0.00725363	0.000111545	0.00305253	-2.05028e-05	0.00300957	4.05706e-05	0.00708677
2018-06-19T04:33:00	-0.00236054	5.90896e-05	0.0162999	-4.46971e-05	0.0105552	-0.000898455	0.0100568	-3.34702e-05	-0.00835637	0.000198521	0.0057745	1.3067e-05	0.00534034	0.00010662	0.00621371	3.03536e-05	0.008765	4.71723e-05	-0.0012342	1.25942e-05	0.00782789	4.70418e-05	0.00555282	0.00012266	-0.00469729	0.000309672	0.00700582	2.77092e-05	-0.000958888	6.8397e-06	0.00171389	4.5895e-06	0.0153093	0.00028082	0.01797	0.00012539	0.00655031	-0.000151012	0.00586813	2.87273e-05	0.0141466	0.000124104	-0.00748623	0.000115122	0.00282277	-1.89596e-05	0.00346807	4.67513e-05	0.00805108
2018-06-19T04:36:00	-0.0029445	7.37076e-05	0.0185737	-5.0932e-05	0.0120277	-0.00102379	0.0100713	-3.35184e-05	-0.00876368	0.000208197	0.00577397	1.30658e-05	0.00529859	0.000105786	0.0073847	3.60738e-05	0.00926068	4.984e-05	-0.00121491	1.23974e-05	0.00681477	4.09534e-05	0.00572897	0.000126552	-0.00617842	0.000407316	0.00589147	2.33017e-05	-0.00144028	1.02735e-05	0.00269643	7.2205e-06	0.0133649	0.000245154	0.0193088	0.000134732	0.00498218	-0.00011486	0.00589978	2.88822e-05	0.0141287	0.000123947	-0.00795582	0.000122343	0.00309722	-2.0803e-05	0.00305794	4.12226e-05	0.0091099
2018-06-19T04:39:00	-0.00276812	6.92924e-05	0.0204032	-5.59489e-05	0.0128718	-0.00109565	0.00956251	-3.18251e-05	-0.0102337	0.000243119	0.00504888	1.1425e-05	0.00469139	9.36635e-05	0.00778858	3.80467e-05	0.00931848	5.0151e-05	-0.0013476	1.37513e-05	0.00523929	3.14856e-05	0.00661269	0.000146073	-0.00813719	0.000536448	0.00643218	2.54403e-05	-0.00128265	9.1491e-06	0.00301742	8.0801e-06	0.0122161	0.000224082	0.0192178	0.000134096	0.00309164	-7.12753e-05	0.00559559	2.73931e-05	0.0135911	0.000119231	-0.00889714	0.000136819	0.00404196	-2.71485e-05	0.0019108	2.57586e-05	0.010288
2018-06-19T04:42:00	-0.00291479	7.29637e-05	0.0219735	-6.02549e-05	0.0131431	-0.00111874	0.00909103	-3.02559e-05	-0.0111633	0.000265204	0.00560575	1.26851e-05	0.00478196	9.54717e-05	0.00805818	3.93637e-05	0.00937077	5.04324e-05	-0.000407008	4.1532e-06	0.00447053	2.68657e-05	0.00703845	0.000155478	-0.00871918	0.000574816	0.00588712	2.32845e-05	-0.00127667	9.1064e-06	0.0036324	9.7269e-06	0.0130017	0.000238492	0.0193699	0.000135158	0.00546471	-0.000125985	0.00498397	2.43989e-05	0.013168	0.00011552	-0.00981311	0.000150904	0.00346976	-2.33052e-05	0.00314761	4.24314e-05	0.0103031
2018-06-19T04:45:00	-0.00229067	5.73406e-05	0.0225031	-6.17071e-05	0.0112783	-0.000960007	0.00872156	-2.90263e-05	-0.0117425	0.000278966	0.00582219	1.31749e-05	0.00504404	0.000100704	0.00683507	3.33888e-05	0.00949757	5.11148e-05	-0.00031027	3.1661e-06	0.00344881	2.07257e-05	0.00710666	0.000156984	-0.00935831	0.000616951	0.00657836	2.60185e-05	-0.0012491	8.9097e-06	0.00297789	7.9742e-06	0.0133331	0.000244571	0.0190115	0.000132657	0.00597166	-0.000137672	0.00513184	2.51228e-05	0.0132892	0.000116583	-0.0097831	0.000150443	0.00274512	-1.84381e-05	0.00459666	6.19653e-05	0.00990991
2018-06-19T04:48:00	-0.00197654	4.94772e-05	0.0211006	-5.78612e-05	0.0113629	-0.00096721	0.00794124	-2.64293e-05	-0.013408	0.000318532	0.00658469	1.49003e-05	0.00461296	9.20975e-05	0.0058987	2.88148e-05	0.00952708	5.12737e-05	0.000277976	-2.8366e-06	0.00395575	2.37721e-05	0.0066705	0.000147349	-0.00870297	0.000573748	0.00692906	2.74056e-05	-0.000967599	6.9018e-06	0.00350147	9.3763e-06	0.0137518	0.000252252	0.0197206	0.000137605	0.00351634	-8.10665e-05	0.00546808	2.67689e-05	0.0128312	0.000112565	-0.00940201	0.000144582	0.00271159	-1.82129e-05	0.00583295	7.86311e-05	0.0094014
2018-06-19T04:51:00	-0.00231641	5.7985e-05	0.019349	-5.30581e-05	0.0101609	-0.00086489	0.00790616	-2.63126e-05	-0.014395	0.000341979	0.00595367	1.34724e-05	0.00481298	9.60909e-05	0.00597789	2.92016e-05	0.0101871	5.48256e-05	0.00100671	-1.02728e-05	0.00388922	2.33723e-05	0.00747194	0.000165053	-0.0081098	0.000534643	0.00685688	2.71201e-05	-0.000650767	4.6419e-06	0.00387515	1.03769e-05	0.0144068	0.000264266	0.0194797	0.000135924	0.00235841	-5.43713e-05	0.0055556	2.71973e-05	0.0122597	0.000107552	-0.00997925	0.000153459	0.00261135	-1.75396e-05	0.00663844	8.94896e-05	0.00981741
2018-06-19T04:54:00	-0.00268317	6.71658e-05	0.0174504	-4.78517e-05	0.0108779	-0.000925919	0.00759906	-2.52905e-05	-0.0153203	0.000363962	0.00731936	1.65628e-05	0.00458843	9.16079e-05	0.00585931	2.86223e-05	0.0107496	5.78533e-05	0.00136158	-1.3894e-05	0.00323951	1.94679e-05	0.00778962	0.000172071	-0.00694908	0.000458121	0.00710534	2.81028e-05	0.000508559	-3.6275e-06	0.00339681	9.096e-06	0.0138297	0.00025368	0.0190558	0.000132966	0.000389577	-8.9814e-06	0.00609889	2.98569e-05	0.0120196	0.000105445	-0.0097731	0.000150289	0.00248394	-1.66838e-05	0.00865821	0.000116717	0.0102145
2018-06-19T04:57:00	-0.00244858	6.12935e-05	0.0132333	-3.62879e-05	0.0107553	-0.000915486	0.00754822	-2.51213e-05	-0.0150627	0.000357842	0.00727253	1.64568e-05	0.00340293	6.79393e-05	0.00667988	3.26308e-05	0.0109399	5.88774e-05	0.00243811	-2.48793e-05	0.00267862	1.60972e-05	0.00801391	0.000177025	-0.00502183	0.000331067	0.00826911	3.27057e-05	0.000374762	-2.6732e-06	0.00334835	8.9663e-06	0.0146243	0.000268256	0.0184581	0.000128795	0.00055241	-1.27354e-05	0.00561872	2.75063e-05	0.0121276	0.000106392	-0.00979906	0.000150688	0.00208703	-1.40179e-05	0.00985877	0.000132901	0.00964627
2018-06-19T05:00:00	-0.00226634	5.67316e-05	0.0136815	-3.7517e-05	0.0109896	-0.000935428	0.00756328	-2.51714e-05	-0.0145733	0.000346215	0.00767846	1.73754e-05	0.00288053	5.75096e-05	0.00722601	3.52986e-05	0.0109547	5.89567e-05	0.00348983	-3.56114e-05	0.00171788	1.03236e-05	0.00770265	0.00017015	-0.00513754	0.000338695	0.00793263	3.13749e-05	0.000808308	-5.7656e-06	0.00282886	7.5752e-06	0.0125569	0.000230333	0.0179276	0.000125094	0.00148199	-3.4166e-05	0.00520428	2.54774e-05	0.0116101	0.000101853	-0.0102406	0.000157478	0.00177403	-1.19156e-05	0.0101478	0.000136797	0.00972612
2018-06-19T05:03:00	-0.00135958	3.40334e-05	0.0148232	-4.06476e-05	0.0111435	-0.000948528	0.00762062	-2.53623e-05	-0.014959	0.000355378	0.00788484	1.78424e-05	0.00289375	5.77735e-05	0.00763926	3.73173e-05	0.0101796	5.47852e-05	0.00526794	-5.37558e-05	0.00109512	6.5811e-06	0.00780973	0.000172515	-0.00529169	0.000348858	0.00852123	3.37029e-05	0.000998653	-7.1233e-06	0.00203573	5.4513e-06	0.0129858	0.000238199	0.0176796	0.000123363	0.000428035	-9.868e-06	0.0054796	2.68252e-05	0.0106284	9.324e-05	-0.00982519	0.00015109	0.00177951	-1.19524e-05	0.0104644	0.000141065	0.00954406
2018-06-19T05:06:00	-0.00021006	5.2583e-06	0.0155429	-4.26213e-05	0.00999196	-0.000850511	0.00798369	-2.65706e-05	-0.0146219	0.000347369	0.00699748	1.58344e-05	0.00290123	5.79229e-05	0.00907093	4.43109e-05	0.010231	5.50621e-05	0.00612947	-6.25471e-05	0.000783643	4.7093e-06	0.00787542	0.000173966	-0.00451298	0.00029752	0.00628825	2.48711e-05	0.00115457	-8.2355e-06	0.00337395	9.0348e-06	0.013191	0.000241963	0.0173046	0.000120747	0.00041656	-9.6035e-06	0.0059136	2.89499e-05	0.0102314	8.97573e-05	-0.00923489	0.000142012	0.000958862	-6.4404e-06	0.0105534	0.000142265	0.0104632
2018-06-19T05:09:00	0.000399581	-1.00024e-05	0.0162829	-4.46503e-05	0.00905224	-0.000770523	0.007745	-2.57762e-05	-0.0138344	0.000328662	0.00667036	1.50942e-05	0.002279	4.55001e-05	0.00971153	4.74402e-05	0.0107461	5.78341e-05	0.00644383	-6.5755e-05	0.00186813	1.12266e-05	0.00785132	0.000173433	-0.00334874	0.000220767	0.00678001	2.6816e-05	0.00246511	-1.75835e-05	0.00303845	8.1364e-06	0.0131465	0.000241148	0.0173814	0.000121283	0.00124032	-2.85946e-05	0.00646134	3.16313e-05	0.00985207	8.64297e-05	-0.00897918	0.00013808	0.000489884	-3.2904e-06	0.00994324	0.00013404	0.00952696
2018-06-19T05:12:00	0.000656724	-1.64393e-05	0.0161587	-4.43096e-05	0.00829218	-0.000705827	0.00753242	-2.50687e-05	-0.0123568	0.000293559	0.0064833	1.46709e-05	0.00184217	3.67788e-05	0.0101229	4.94497e-05	0.0102318	5.50666e-05	0.00712555	-7.27115e-05	0.00139437	8.3795e-06	0.00784342	0.000173259	-0.00316715	0.000208796	0.00744462	2.94447e-05	0.00287211	-2.04866e-05	0.00202617	5.4257e-06	0.0136376	0.000250156	0.0174951	0.000122076	1.81623e-05	-4.187e-07	0.00635688	3.11199e-05	0.00922793	8.09543e-05	-0.00862333	0.000132608	0.000704031	-4.7287e-06	0.00971759	0.000130998	0.00842437
2018-06-19T05:15:00	0.00139176	-3.48389e-05	0.0160923	-4.41278e-05	0.00708325	-0.000602924	0.00811231	-2.69987e-05	-0.0116761	0.000277386	0.0053191	1.20365e-05	0.00146479	2.92445e-05	0.0109957	5.37133e-05	0.0106772	5.74633e-05	0.00737488	-7.52557e-05	0.000818096	4.9164e-06	0.00794216	0.00017544	-0.00264428	0.000174326	0.00782785	3.09604e-05	0.00334847	-2.38844e-05	0.000706631	1.8922e-06	0.0145998	0.000267806	0.0173758	0.000121243	-0.00169686	3.91197e-05	0.00730216	3.57475e-05	0.00873855	7.6661e-05	-0.00801639	0.000123275	0.000532562	-3.577e-06	0.00973919	0.000131289	0.00793032
2018-06-19T05:18:00	0.00197601	-4.94641e-05	0.0159486	-4.37336e-05	0.00717036	-0.000610338	0.00863865	-2.87504e-05	-0.0109466	0.000260057	0.00535256	1.21122e-05	0.000672758	1.34316e-05	0.0133431	6.518e-05	0.0108872	5.85938e-05	0.00696302	-7.10529e-05	0.00132055	7.9359e-06	0.00765593	0.000169117	-0.00182212	0.000120124	0.00848939	3.35769e-05	0.00427729	-3.05096e-05	-0.000215838	-5.78e-07	0.0152456	0.000279652	0.0167466	0.000116853	-0.000998253	2.30139e-05	0.00768513	3.76223e-05	0.00865176	7.58997e-05	-0.00779179	0.000119821	0.000651803	-4.3779e-06	0.00926811	0.000124939	0.007428
2018-06-19T05:21:00	0.00301176	-7.53911e-05	0.0140823	-3.86158e-05	0.00769443	-0.000654947	0.00907177	-3.01918e-05	-0.00955435	0.000226981	0.00680588	1.54009e-05	0.000584063	1.16608e-05	0.0145097	7.08787e-05	0.0108273	5.82714e-05	0.00664669	-6.7825e-05	0.00138663	8.333e-06	0.00765049	0.000168997	-0.001509	9.94815e-05	0.00882683	3.49116e-05	0.00434531	-3.09948e-05	-0.000804625	-2.1546e-06	0.0142033	0.000260533	0.0159971	0.000111624	-0.000390386	9e-06	0.00827397	4.0505e-05	0.00796602	6.98838e-05	-0.00796938	0.000122552	0.00086736	-5.8258e-06	0.0109742	0.000147937	0.00820978
2018-06-19T05:24:00	0.00353364	-8.84551e-05	0.013371	-3.66656e-05	0.00821009	-0.00069884	0.00892307	-2.96969e-05	-0.00842951	0.000200258	0.00669283	1.5145e-05	0.000432342	8.6317e-06	0.0148347	7.24665e-05	0.0109919	5.91573e-05	0.00744843	-7.60062e-05	0.00345266	2.07488e-05	0.00742999	0.000164126	-0.000253998	1.6745e-05	0.00833569	3.2969e-05	0.0046598	-3.32381e-05	-0.00197718	-5.2945e-06	0.0129691	0.000237894	0.0150308	0.000104881	0.00027411	-6.3194e-06	0.00894475	4.37888e-05	0.00725606	6.36556e-05	-0.00835665	0.000128507	0.00146216	-9.8209e-06	0.0120284	0.000162148	0.00909804
2018-06-19T05:27:00	0.00447966	-0.000112136	0.0133755	-3.66777e-05	0.00859871	-0.000731919	0.00906313	-3.01631e-05	-0.00728645	0.000173103	0.00684608	1.54918e-05	0.000460228	9.1884e-06	0.0158702	7.75248e-05	0.011027	5.9346e-05	0.00758216	-7.73708e-05	0.00482111	2.89725e-05	0.00689251	0.000152254	0.00105679	-6.96695e-05	0.00771158	3.05006e-05	0.0050835	-3.62603e-05	-0.00244741	-6.5537e-06	0.0130793	0.000239915	0.0140945	9.83479e-05	0.000474261	-1.09337e-05	0.00906475	4.43762e-05	0.00669655	5.87471e-05	-0.00808243	0.00012429	0.00128163	-8.6083e-06	0.0119371	0.000160919	0.0101188
2018-06-19T05:30:00	0.00553458	-0.000138543	0.013572	-3.72165e-05	0.00863835	-0.000735293	0.00896103	-2.98233e-05	-0.00654926	0.00015559	0.00522036	1.1813e-05	0.000228705	4.5661e-06	0.0165966	8.10735e-05	0.011108	5.9782e-05	0.00655363	-6.68754e-05	0.00621519	3.73503e-05	0.00678851	0.000149956	0.00131657	-8.67958e-05	0.00832421	3.29236e-05	0.00583688	-4.16341e-05	-0.0027347	-7.323e-06	0.0120413	0.000220875	0.0132654	9.25625e-05	-0.00226677	5.22585e-05	0.0101836	4.98537e-05	0.00553536	4.85603e-05	-0.00770285	0.000118453	0.00130926	-8.7938e-06	0.0106546	0.00014363	0.00944772
2018-06-19T05:33:00	0.00650877	-0.000162929	0.0129293	-3.54542e-05	0.00923047	-0.000785694	0.00943162	-3.13895e-05	-0.00491385	0.000116738	0.0048615	1.1001e-05	-0.000202351	-4.0399e-06	0.0175009	8.54909e-05	0.0118343	6.36909e-05	0.00660957	-6.74461e-05	0.00822219	4.94114e-05	0.00754083	0.000166575	0.00348047	-0.000229452	0.00905651	3.582e-05	0.00697081	-4.97224e-05	-0.00215077	-5.7594e-06	0.0134295	0.000246338	0.0115789	8.07948e-05	-0.000224064	5.1656e-06	0.0116398	5.69824e-05	0.004735	4.15389e-05	-0.00640861	9.85504e-05	0.00253236	-1.7009e-05	0.01094	0.000147477	0.00918206
2018-06-19T05:36:00	0.00730953	-0.000182974	0.0127423	-3.49413e-05	0.0109227	-0.000929739	0.0102999	-3.4279e-05	-0.00306674	7.2856e-05	0.00543782	1.23051e-05	-0.00145334	-2.90158e-05	0.0169523	8.28108e-05	0.0131841	7.09555e-05	0.00604414	-6.16764e-05	0.00964572	5.79661e-05	0.00791617	0.000174866	0.00490543	-0.000323393	0.00991541	3.92171e-05	0.00704787	-5.02721e-05	-0.00143725	-3.8487e-06	0.0145925	0.000267672	0.0100613	7.02048e-05	-0.00163383	3.76666e-05	0.01246	6.09977e-05	0.00507392	4.45122e-05	-0.00600394	9.23275e-05	0.00420136	-2.82191e-05	0.0125242	0.000168832	0.00879184
2018-06-19T05:39:00	0.00820812	-0.000205468	0.0132577	-3.63548e-05	0.0132622	-0.00112888	0.0108927	-3.62522e-05	0.000777389	-1.84683e-05	0.00632119	1.43041e-05	-0.0019594	-3.91193e-05	0.0159081	7.77102e-05	0.0126814	6.82501e-05	0.00686558	-7.00586e-05	0.0106433	6.39613e-05	0.00824196	0.000182063	0.00652839	-0.000430388	0.0124151	4.91038e-05	0.00711209	-5.07301e-05	-0.00115523	-3.0935e-06	0.0180886	0.000331801	0.00979347	6.83363e-05	-0.00251503	5.79819e-05	0.0132456	6.48437e-05	0.005088	4.46357e-05	-0.00542451	8.34172e-05	0.00630712	-4.23628e-05	0.0130684	0.000176169	0.00888212
2018-06-19T05:42:00	0.00963667	-0.000241228	0.0130525	-3.5792e-05	0.0147004	-0.00125129	0.0117036	-3.89507e-05	0.00138747	-3.29619e-05	0.00700565	1.58529e-05	-0.00152403	-3.04272e-05	0.0154932	7.56831e-05	0.0130549	7.02601e-05	0.00666408	-6.80024e-05	0.0125528	7.5436e-05	0.00855185	0.000188908	0.0077439	-0.000510521	0.0142212	5.62474e-05	0.00717985	-5.12135e-05	-6.02894e-05	-1.614e-07	0.0216032	0.00039627	0.00991856	6.9209e-05	-0.00061409	1.41574e-05	0.0136464	6.68056e-05	0.00464611	4.07591e-05	-0.0034643	5.32734e-05	0.00764375	-5.13406e-05	0.0141917	0.000191312	0.00938676
2018-06-19T05:45:00	0.0113011	-0.000282891	0.0141488	-3.87982e-05	0.0154957	-0.00131899	0.01307	-4.34984e-05	0.00345148	-8.19963e-05	0.00870507	1.96985e-05	0.000329588	6.5802e-06	0.0149146	7.28567e-05	0.0128529	6.91728e-05	0.00650436	-6.63726e-05	0.0152729	9.17825e-05	0.0087429	0.000193128	0.00992309	-0.000654185	0.0142211	5.62468e-05	0.00805174	-5.74326e-05	0.0023277	6.2331e-06	0.0250467	0.000459434	0.0104756	7.3096e-05	0.000691835	-1.59497e-05	0.0145022	7.09952e-05	0.00456333	4.00329e-05	-0.00215855	3.31937e-05	0.00905897	-6.08461e-05	0.0142938	0.000192687	0.00898673
2018-06-19T05:48:00	0.0139309	-0.000348723	0.0144661	-3.96684e-05	0.0181331	-0.00154348	0.0150734	-5.0166e-05	0.00651161	-0.000154695	0.0107725	2.43768e-05	0.00250929	5.00979e-05	0.0141685	6.92124e-05	0.0133912	7.20698e-05	0.00751926	-7.67289e-05	0.0175653	0.000105559	0.00963808	0.000212903	0.0133558	-0.000880489	0.0154575	6.1137e-05	0.00851617	-6.07454e-05	0.00559957	1.49946e-05	0.0295855	0.000542689	0.0114496	7.98921e-05	-0.000437909	1.00957e-05	0.0162525	7.95636e-05	0.00538923	4.72784e-05	-0.00109263	1.68023e-05	0.0104644	-7.02861e-05	0.0160783	0.000216743	0.00945157
2018-06-19T05:51:00	0.016196	-0.000405422	0.0142521	-3.90814e-05	0.0199613	-0.0016991	0.0174369	-5.80318e-05	0.00924501	-0.000219632	0.012567	2.84376e-05	0.00487321	9.72935e-05	0.013654	6.66991e-05	0.01463	7.87369e-05	0.0075616	-7.7161e-05	0.0220394	0.000132446	0.0103225	0.000228022	0.0159932	-0.00105436	0.0186953	7.3943e-05	0.00915761	-6.53207e-05	0.00967235	2.59008e-05	0.0317099	0.000581658	0.0129495	9.03583e-05	0.00324423	-7.47931e-05	0.0190296	9.31591e-05	0.00542668	4.76069e-05	0.000972267	-1.49514e-05	0.0116211	-7.80553e-05	0.0172807	0.000232953	0.00913968
2018-06-19T05:54:00	0.01773	-0.000443822	0.0147385	-4.04152e-05	0.0214854	-0.00182883	0.0197074	-6.55883e-05	0.0111525	-0.000264949	0.0161516	3.65491e-05	0.00662487	0.000132265	0.0138388	6.76016e-05	0.0156991	8.44909e-05	0.00722078	-7.36832e-05	0.0256352	0.000154055	0.0109524	0.000241936	0.018068	-0.00119115	0.0223391	8.83547e-05	0.00975656	-6.9593e-05	0.0155096	4.15318e-05	0.0342598	0.000628431	0.0144656	0.000100937	0.00851493	-0.000196305	0.0212352	0.000103957	0.00639224	5.60775e-05	0.00280476	-4.31311e-05	0.0137896	-9.26202e-05	0.0174277	0.000234934	0.00920061
2018-06-19T05:57:00	0.019773	-0.000494962	0.0153706	-4.21487e-05	0.024841	-0.00211445	0.0228286	-7.5976e-05	0.0136816	-0.000325032	0.0195204	4.41722e-05	0.00829256	0.000165561	0.0137926	6.73761e-05	0.0169206	9.10648e-05	0.00729273	-7.44174e-05	0.0284465	0.00017095	0.0118926	0.000262703	0.0202219	-0.00133314	0.0272361	0.000107723	0.0100857	-7.19407e-05	0.0204332	5.47163e-05	0.0383169	0.000702852	0.0162604	0.000113461	0.010889	-0.000251038	0.0235093	0.000115089	0.00734529	6.44383e-05	0.0054876	-8.43873e-05	0.015736	-0.000105694	0.0190955	0.000257417	0.0098476
2018-06-19T06:00:00	0.0219601	-0.00054971	0.0173508	-4.75787e-05	0.028536	-0.00242898	0.0257309	-8.56353e-05	0.0169844	-0.000403495	0.0227891	5.1569e-05	0.0113342	0.000226286	0.0132621	6.47844e-05	0.0188106	0.000101236	0.00803486	-8.19903e-05	0.0324799	0.000195189	0.0134129	0.000296288	0.0225212	-0.00148472	0.0308978	0.000122206	0.00980256	-6.99211e-05	0.026062	6.97894e-05	0.0425462	0.000780429	0.0183008	0.000127698	0.0144954	-0.000334179	0.0258558	0.000126576	0.00905311	7.94206e-05	0.00812818	-0.000124994	0.0184389	-0.000123848	0.0203698	0.000274596	0.0111064
2018-06-19T06:03:00	0.0244281	-0.000611491	0.0194307	-5.32822e-05	0.0314473	-0.00267679	0.0281167	-9.35753e-05	0.0212961	-0.000505929	0.0263933	5.97248e-05	0.013177	0.000263079	0.0130875	6.39318e-05	0.0206517	0.000111145	0.00889111	-9.07277e-05	0.036299	0.00021814	0.0148393	0.000327796	0.0249942	-0.00164776	0.0353842	0.00013995	0.00905983	-6.46232e-05	0.0323019	8.64985e-05	0.0461976	0.000847407	0.0210523	0.000146897	0.0172296	-0.000397214	0.0287081	0.00014054	0.011279	9.89479e-05	0.010373	-0.000159515	0.0208601	-0.000140111	0.0221	0.00029792	0.0120217
2018-06-19T06:06:00	0.0278008	-0.000695918	0.0217772	-5.97167e-05	0.0347499	-0.0029579	0.0303929	-0.000101151	0.0273537	-0.000649838	0.0292916	6.62833e-05	0.0165749	0.000330917	0.0128984	6.30077e-05	0.0227169	0.00012226	0.00965697	-9.85428e-05	0.0396525	0.000238292	0.0160203	0.000353885	0.0287348	-0.00189436	0.0382569	0.000151312	0.0091814	-6.54904e-05	0.0379863	0.00010172	0.0497334	0.000912265	0.0223607	0.000156027	0.0245516	-0.000566018	0.0311481	0.000152485	0.0135489	0.000118861	0.0130259	-0.00020031	0.0226007	-0.000151801	0.0226155	0.000304868	0.0128662
2018-06-19T06:09:00	0.0299538	-0.000749811	0.0237783	-6.52039e-05	0.0380661	-0.00324017	0.0331814	-0.000110431	0.0311355	-0.000739682	0.0325148	7.35769e-05	0.0195916	0.000391146	0.011793	5.76078e-05	0.0251541	0.000135377	0.0099623	-0.000101659	0.0448428	0.000269483	0.0170376	0.000376356	0.0333116	-0.00219609	0.0421215	0.000166597	0.00992335	-7.07826e-05	0.0445276	0.000119237	0.0525302	0.000963566	0.0248925	0.000173693	0.0304623	-0.000702284	0.0342916	0.000167874	0.015976	0.000140154	0.0166778	-0.000256469	0.0237738	-0.000159681	0.0244762	0.000329951	0.0132945
2018-06-19T06:12:00	0.0329109	-0.000823834	0.0252206	-6.91588e-05	0.0395763	-0.00336872	0.0363262	-0.000120898	0.0387929	-0.000921597	0.0361908	8.18952e-05	0.0235936	0.000471046	0.0117082	5.71936e-05	0.027639	0.00014875	0.00954912	-9.74423e-05	0.0494319	0.000297062	0.0182723	0.000403631	0.0382272	-0.00252015	0.0471014	0.000186294	0.0103838	-7.40672e-05	0.0514962	0.000137897	0.0563448	0.00103354	0.0267095	0.000186372	0.0396815	-0.000914826	0.0375256	0.000183706	0.0184899	0.000162207	0.020353	-0.000312984	0.0253704	-0.000170405	0.0261081	0.000351951	0.0132278
2018-06-19T06:15:00	0.0356263	-0.000891807	0.0271858	-7.45477e-05	0.0440998	-0.00375376	0.0398766	-0.000132714	0.0434325	-0.00103182	0.0407177	9.2139e-05	0.0267357	0.000533777	0.0116565	5.69411e-05	0.0298469	0.000160632	0.00920364	-9.39169e-05	0.0540401	0.000324754	0.019507	0.000430904	0.0427813	-0.00282038	0.0539483	0.000213374	0.0107839	-7.6921e-05	0.0578752	0.000154979	0.0578914	0.00106191	0.0300662	0.000209794	0.045163	-0.0010412	0.0412908	0.000202138	0.0220821	0.00019372	0.0243684	-0.000374733	0.02767	-0.00018585	0.0271404	0.000365867	0.0136769
2018-06-19T06:18:00	0.0378933	-0.000948555	0.0287201	-7.87551e-05	0.0487522	-0.00414977	0.0434622	-0.000144647	0.0457461	-0.00108678	0.04405	9.96796e-05	0.0293384	0.000585739	0.0117596	5.74448e-05	0.0328838	0.000176977	0.00901025	-9.19435e-05	0.0585563	0.000351895	0.020958	0.000462956	0.0461241	-0.00304076	0.0599111	0.000236958	0.0109146	-7.78532e-05	0.0635552	0.000170189	0.0604474	0.00110879	0.0338	0.000235848	0.0520884	-0.00120086	0.044317	0.000216953	0.0256562	0.000225075	0.0284085	-0.000436861	0.0300656	-0.000201941	0.0288134	0.000388419	0.0146631
2018-06-19T06:21:00	0.0406851	-0.00101844	0.0299588	-8.21518e-05	0.0536024	-0.00456262	0.0465762	-0.000155011	0.0488316	-0.00116008	0.0484299	0.000109591	0.033094	0.00066072	0.0126729	6.19062e-05	0.0357962	0.000192651	0.00903631	-9.22095e-05	0.0628466	0.000377677	0.0227492	0.000502523	0.0494622	-0.00326082	0.0654802	0.000258985	0.0114353	-8.15672e-05	0.069085	0.000184997	0.0617427	0.00113255	0.0376829	0.000262941	0.057328	-0.00132165	0.0473545	0.000231823	0.0302914	0.000265739	0.031686	-0.000487262	0.0316965	-0.000212895	0.0306265	0.00041286	0.015135
2018-06-19T06:24:00	0.043358	-0.00108535	0.0319701	-8.76672e-05	0.0588114	-0.00500601	0.0492671	-0.000163966	0.0555462	-0.0013196	0.0508852	0.000115147	0.0377984	0.000754644	0.0143106	6.99061e-05	0.0390652	0.000210245	0.00925068	-9.43969e-05	0.067921	0.000408172	0.0241074	0.000532526	0.0522787	-0.0034465	0.0705346	0.000278976	0.0115432	-8.23371e-05	0.0735243	0.000196885	0.0643685	0.00118072	0.04183	0.000291879	0.0588233	-0.00135612	0.0502574	0.000246034	0.0346925	0.000304348	0.0351313	-0.000540243	0.0348888	-0.000234336	0.0310554	0.000418643	0.0168104
2018-06-19T06:27:00	0.0460329	-0.00115231	0.0345821	-9.48297e-05	0.0626204	-0.00533023	0.0521572	-0.000173585	0.056308	-0.0013377	0.0543999	0.0001231	0.0414422	0.000827391	0.0160823	7.85612e-05	0.0427123	0.000229873	0.00997263	-0.000101764	0.0729025	0.000438108	0.0254477	0.000562132	0.0542885	-0.003579	0.0740157	0.000292744	0.0121896	-8.69477e-05	0.0788745	0.000211212	0.0679781	0.00124693	0.0447367	0.000312161	0.0643553	-0.00148366	0.0536154	0.000262473	0.0388214	0.000340571	0.0393505	-0.000605126	0.0370153	-0.00024862	0.0322388	0.000434595	0.0180625
2018-06-19T06:30:00	0.0485149	-0.00121444	0.0377134	-0.000103416	0.0668901	-0.00569366	0.054501	-0.000181385	0.0582092	-0.00138287	0.0567975	0.000128526	0.0453273	0.000904957	0.0174211	8.5101e-05	0.0458547	0.000246785	0.0109131	-0.000111361	0.0778862	0.000468058	0.026699	0.000589774	0.0547333	-0.00360832	0.0780911	0.000308863	0.0138083	-9.84935e-05	0.0835246	0.000223664	0.0715798	0.001313	0.047495	0.000331407	0.0687047	-0.00158393	0.0557554	0.000272949	0.0424407	0.000372322	0.0416157	-0.000639958	0.0384199	-0.000258054	0.0344018	0.000463753	0.0189923
2018-06-19T06:33:00	0.051602	-0.00129172	0.0397566	-0.000109019	0.0705005	-0.00600098	0.0560136	-0.000186419	0.0615934	-0.00146326	0.0587341	0.000132908	0.0486241	0.000970778	0.018831	9.19884e-05	0.048204	0.000259428	0.0111313	-0.000113588	0.0824501	0.000495485	0.0281672	0.000622206	0.0542073	-0.00357365	0.0833614	0.000329708	0.0144272	-0.000102909	0.0877069	0.000234863	0.0738244	0.00135417	0.0496789	0.000346646	0.0723339	-0.0016676	0.0577413	0.000282671	0.0462519	0.000405756	0.0435561	-0.000669798	0.0405019	-0.000272038	0.0355542	0.000479289	0.0200446
2018-06-19T06:36:00	0.0537034	-0.00134432	0.0432986	-0.000118732	0.0740817	-0.0063058	0.058712	-0.0001954	0.0632321	-0.00150219	0.0621284	0.000140589	0.0527915	0.00105398	0.0200383	9.78857e-05	0.0518811	0.000279218	0.0123715	-0.000126243	0.0867812	0.000521513	0.029585	0.000653525	0.0526642	-0.00347191	0.0882836	0.000349176	0.0151533	-0.000108088	0.0922132	0.00024693	0.0771419	0.00141502	0.052467	0.000366101	0.0763981	-0.0017613	0.0613068	0.000300126	0.0505617	0.000443565	0.0468661	-0.000720699	0.0419366	-0.000281674	0.0373498	0.000503494	0.020919
2018-06-19T06:39:00	0.0557102	-0.00139455	0.0459226	-0.000125927	0.0785122	-0.00668292	0.0610338	-0.000203127	0.0623231	-0.0014806	0.0651937	0.000147525	0.0562891	0.00112381	0.021559	0.000105314	0.0542836	0.000292149	0.0118042	-0.000120454	0.0895694	0.000538269	0.0318786	0.000704189	0.0495484	-0.0032665	0.0929725	0.000367721	0.0161744	-0.000115371	0.0968721	0.000259406	0.0801281	0.0014698	0.055036	0.000384027	0.0810833	-0.00186931	0.0633476	0.000310117	0.0545142	0.000478239	0.0491752	-0.000756207	0.0441384	-0.000296463	0.0399257	0.000538218	0.0215569
2018-06-19T06:42:00	0.0572672	-0.00143353	0.0485269	-0.000133069	0.0820495	-0.00698402	0.0625044	-0.000208021	0.0637032	-0.00151339	0.0679169	0.000153687	0.0595034	0.00118798	0.0224988	0.000109905	0.0562042	0.000302485	0.0124582	-0.000127128	0.0921758	0.000553931	0.0331328	0.000731894	0.0454939	-0.00299921	0.0964149	0.000381337	0.0158178	-0.000112827	0.100266	0.000268495	0.083079	0.00152393	0.0574919	0.000401163	0.0830369	-0.00191435	0.0644829	0.000315674	0.0581345	0.000509999	0.0497939	-0.000765721	0.0455617	-0.000306023	0.0412979	0.000556716	0.022328
2018-06-19T06:45:00	0.0591277	-0.0014801	0.0524887	-0.000143932	0.0848535	-0.0072227	0.0643737	-0.000214243	0.0644677	-0.00153155	0.0703223	0.000159131	0.0635845	0.00126946	0.0240225	0.000117348	0.0584947	0.000314812	0.0137415	-0.000140223	0.094988	0.000570831	0.0346679	0.000765806	0.0422392	-0.00278464	0.101017	0.000399539	0.0167233	-0.000119286	0.102982	0.000275766	0.0841969	0.00154443	0.0609532	0.000425315	0.0865539	-0.00199543	0.0664076	0.000325096	0.0622703	0.000546281	0.0515865	-0.000793288	0.0474272	-0.000318553	0.0422159	0.000569092	0.0238282
2018-06-19T06:48:00	0.0607339	-0.00152031	0.0562859	-0.000154345	0.0872824	-0.00742944	0.0657553	-0.000218841	0.0629559	-0.00149563	0.0729906	0.000165168	0.0670213	0.00133808	0.0266348	0.000130109	0.0604743	0.000325466	0.0139423	-0.000142271	0.0974895	0.000585864	0.03767	0.000832121	0.0375722	-0.00247697	0.104379	0.000412836	0.0169021	-0.000120562	0.105143	0.000281553	0.0846475	0.0015527	0.0636352	0.00044403	0.0860207	-0.00198314	0.0681539	0.000333646	0.065235	0.000572289	0.0527841	-0.000811705	0.0485624	-0.000326178	0.0435309	0.000586819	0.0247804
2018-06-19T06:51:00	0.0637502	-0.00159581	0.059088	-0.000162029	0.0900869	-0.00766816	0.0676929	-0.000225289	0.0674355	-0.00160206	0.0741486	0.000167789	0.0700098	0.00139774	0.0306712	0.000149827	0.062814	0.000338058	0.0150045	-0.000153111	0.0999025	0.000600365	0.0400713	0.000885164	0.0325266	-0.00214434	0.105986	0.000419191	0.0173073	-0.000123452	0.107413	0.000287631	0.0865525	0.00158764	0.0658387	0.000459405	0.0884278	-0.00203863	0.0693048	0.00033928	0.0679712	0.000596293	0.0539771	-0.00083005	0.049554	-0.000332838	0.0456718	0.000615679	0.025839
2018-06-19T06:54:00	0.0663474	-0.00166083	0.0621945	-0.000170547	0.0927361	-0.00789366	0.0691216	-0.000230044	0.0673014	-0.00159887	0.0759733	0.000171918	0.0739609	0.00147663	0.0352293	0.000172093	0.0656714	0.000353436	0.0152843	-0.000155966	0.103547	0.000622267	0.0417283	0.000921767	0.0280335	-0.00184812	0.107562	0.000425424	0.0184429	-0.000131552	0.110323	0.000295426	0.0886441	0.00162601	0.0674365	0.000470554	0.0890089	-0.00205203	0.0713685	0.000349383	0.0701352	0.000615278	0.0561733	-0.000863823	0.0505291	-0.000339388	0.0474441	0.00063957	0.0263041
2018-06-19T06:57:00	0.0675837	-0.00169177	0.0654745	-0.000179542	0.0952858	-0.00811069	0.0703867	-0.000234255	0.065213	-0.00154925	0.0782514	0.000177073	0.0771938	0.00154117	0.0388183	0.000189625	0.0684318	0.000368292	0.0155494	-0.000158671	0.106582	0.000640506	0.0440909	0.000973957	0.0223908	-0.00147612	0.110918	0.000438699	0.0195128	-0.000139184	0.112866	0.000302234	0.0904291	0.00165875	0.0699935	0.000488396	0.08974	-0.00206888	0.0730964	0.000357842	0.0729577	0.000640039	0.0574442	-0.000883367	0.0525708	-0.000353101	0.0496536	0.000669355	0.0266594
2018-06-19T07:00:00	0.06913	-0.00173048	0.0678676	-0.000186104	0.0982559	-0.0083635	0.0716404	-0.000238427	0.0698912	-0.00166039	0.0783869	0.00017738	0.0781308	0.00155988	0.0432167	0.000211111	0.0703491	0.000378611	0.015629	-0.000159484	0.10832	0.000650948	0.0459938	0.00101599	0.016023	-0.00105632	0.114507	0.000452893	0.0190684	-0.000136014	0.113629	0.000304277	0.0924933	0.00169661	0.072702	0.000507295	0.0869363	-0.00200425	0.0744396	0.000364417	0.0753407	0.000660944	0.0585185	-0.000899887	0.054622	-0.000366878	0.0518469	0.000698922	0.0273817
2018-06-19T07:03:00	0.0699172	-0.00175019	0.070757	-0.000194027	0.100799	-0.00857999	0.0729	-0.000242619	0.0689642	-0.00163837	0.0802907	0.000181688	0.0806719	0.00161061	0.0475707	0.00023238	0.0726795	0.000391153	0.0165425	-0.000168805	0.110379	0.000663321	0.0483699	0.00106848	0.00991981	-0.000653968	0.117518	0.000464801	0.0200514	-0.000143026	0.115302	0.000308757	0.0940698	0.00172553	0.0745786	0.000520389	0.0841491	-0.00193999	0.0750891	0.000367597	0.0767276	0.000673111	0.0591495	-0.000909591	0.0574339	-0.000385765	0.0539639	0.00072746	0.0281995
2018-06-19T07:06:00	0.0710486	-0.00177851	0.0738735	-0.000202573	0.103691	-0.00882615	0.0737102	-0.000245316	0.0701139	-0.00166568	0.0810559	0.000183419	0.0820292	0.00163771	0.0507584	0.000247952	0.0739514	0.000397998	0.0172238	-0.000175757	0.111084	0.00066756	0.0501404	0.00110759	0.00348003	-0.000229423	0.119314	0.000471907	0.0203391	-0.000145078	0.115254	0.00030863	0.0947632	0.00173825	0.076664	0.000534941	0.0804238	-0.00185411	0.0753551	0.000368899	0.0785449	0.000689054	0.0594898	-0.000914823	0.0589918	-0.000396228	0.0568392	0.000766221	0.0284716
2018-06-19T07:09:00	0.073193	-0.00183219	0.0772724	-0.000211893	0.105462	-0.00897692	0.0739482	-0.000246108	0.0711734	-0.00169085	0.0813569	0.0001841	0.0846605	0.00169024	0.0543642	0.000265566	0.0763764	0.000411049	0.0185631	-0.000189424	0.112714	0.000677354	0.051993	0.00114851	-0.00237854	0.000156807	0.120325	0.000475904	0.0208872	-0.000148987	0.116082	0.000310845	0.0952364	0.00174693	0.0784046	0.000547086	0.0802177	-0.00184936	0.0772988	0.000378414	0.0799726	0.000701579	0.0606858	-0.000933216	0.0609063	-0.000409087	0.0581256	0.000783563	0.029608
2018-06-19T07:12:00	0.0734945	-0.00183973	0.0803215	-0.000220254	0.107511	-0.00915129	0.0747261	-0.000248696	0.0697447	-0.00165691	0.0823493	0.000186346	0.0871589	0.00174012	0.0580562	0.000283601	0.0788193	0.000424197	0.019422	-0.000198188	0.11447	0.000687911	0.0542098	0.00119748	-0.00692172	0.000456318	0.121407	0.000480186	0.0220387	-0.000157201	0.1158	0.00031009	0.0957151	0.00175571	0.0803443	0.000560621	0.0814372	-0.00187747	0.0774409	0.00037911	0.0814062	0.000714156	0.0617856	-0.000950128	0.0627834	-0.000421695	0.0612388	0.00082553	0.0303318
2018-06-19T07:15:00	0.0744285	-0.00186311	0.0828506	-0.00022719	0.108771	-0.00925858	0.0756566	-0.000251793	0.072398	-0.00171995	0.0810185	0.000183335	0.0879174	0.00175527	0.06339	0.000309656	0.0807858	0.00043478	0.0202042	-0.00020617	0.114483	0.000687987	0.056683	0.00125211	-0.0122627	0.000808428	0.122328	0.000483828	0.0232298	-0.000165697	0.113971	0.000305195	0.0964595	0.00176937	0.0818225	0.000570936	0.0782807	-0.0018047	0.0787502	0.000385519	0.0818637	0.000718169	0.0621002	-0.000954965	0.0641933	-0.000431165	0.0631064	0.000850706	0.0319403
2018-06-19T07:18:00	0.0751141	-0.00188028	0.0858215	-0.000235337	0.110005	-0.00936358	0.0761906	-0.000253571	0.0688647	-0.00163601	0.0803811	0.000181892	0.0886418	0.00176973	0.0660902	0.000322846	0.0829151	0.00044624	0.021524	-0.000219638	0.115399	0.000693494	0.0595017	0.00131438	-0.0170762	0.00112576	0.123913	0.000490095	0.0247852	-0.000176791	0.113193	0.000303112	0.098294	0.00180302	0.0830746	0.000579672	0.0761957	-0.00175663	0.0797119	0.000390227	0.0816929	0.000716671	0.0624392	-0.000960179	0.0656206	-0.000440752	0.0642869	0.000866619	0.0327031
2018-06-19T07:21:00	0.0752036	-0.00188252	0.0870061	-0.000238585	0.110311	-0.00938965	0.0758251	-0.000252354	0.0676125	-0.00160626	0.0805708	0.000182322	0.0890945	0.00177877	0.070625	0.000344998	0.0852235	0.000458663	0.0225412	-0.000230018	0.116499	0.000700103	0.0626749	0.00138447	-0.0220182	0.00145156	0.125197	0.000495176	0.0254532	-0.000181556	0.111809	0.000299404	0.100959	0.00185191	0.0838132	0.000584826	0.0759613	-0.00175123	0.0801089	0.000392171	0.08129	0.000713137	0.0632931	-0.00097331	0.0671524	-0.000451041	0.0665739	0.00089745	0.0339525
2018-06-19T07:24:00	0.0766413	-0.00191851	0.0894121	-0.000245182	0.111763	-0.00951321	0.0767668	-0.000255488	0.0689138	-0.00163717	0.0810726	0.000183457	0.0909411	0.00181563	0.0738717	0.000360858	0.0868812	0.000467585	0.0238261	-0.000243129	0.117489	0.000706049	0.0650353	0.00143661	-0.0260454	0.00171706	0.126547	0.000500513	0.0261393	-0.00018645	0.112515	0.000301296	0.103113	0.00189142	0.0852938	0.000595157	0.0709214	-0.00163504	0.08155	0.000399226	0.0817721	0.000717365	0.0646883	-0.000994765	0.0687782	-0.00046196	0.0685787	0.000924476	0.0351047
2018-06-19T07:27:00	0.0786265	-0.0019682	0.0921635	-0.000252727	0.11309	-0.00962617	0.0779689	-0.000259489	0.0682852	-0.00162224	0.0806956	0.000182604	0.0917165	0.00183112	0.0776224	0.00037918	0.0883023	0.000475233	0.0257664	-0.000262929	0.11897	0.00071495	0.0676676	0.00149476	-0.0312059	0.00205727	0.126602	0.000500733	0.0272299	-0.000194229	0.11119	0.000297747	0.105474	0.00193472	0.0869787	0.000606915	0.0685888	-0.00158126	0.0825922	0.000404328	0.0820824	0.000720088	0.0657962	-0.0010118	0.07043	-0.000473055	0.0708304	0.00095483	0.036722
2018-06-19T07:30:00	0.0801596	-0.00200658	0.0938837	-0.000257444	0.114189	-0.00971969	0.0779236	-0.000259338	0.0744722	-0.00176922	0.0801182	0.000181297	0.091427	0.00182534	0.081891	0.000400032	0.0893698	0.000480978	0.0273192	-0.000278774	0.119911	0.00072061	0.070105	0.0015486	-0.0350996	0.00231396	0.127145	0.000502878	0.0283998	-0.000202574	0.108921	0.00029167	0.107467	0.00197128	0.0875528	0.00061092	0.0655241	-0.00151061	0.0837586	0.000410038	0.0815762	0.000715647	0.0673851	-0.00103624	0.0714292	-0.000479766	0.0717517	0.000967249	0.0372843
2018-06-19T07:33:00	0.0822084	-0.00205786	0.0957586	-0.000262585	0.115169	-0.00980316	0.0791749	-0.000263503	0.0743502	-0.00176632	0.0794557	0.000179798	0.0924878	0.00184652	0.0837899	0.000409308	0.0912181	0.000490926	0.0284287	-0.000290096	0.120445	0.000723817	0.0719312	0.00158894	-0.0388576	0.00256171	0.128408	0.000507874	0.0291602	-0.000207998	0.108001	0.000289208	0.108527	0.00199073	0.0891175	0.000621838	0.063069	-0.001454	0.0858533	0.000420293	0.0809646	0.000710282	0.0680212	-0.00104602	0.0727946	-0.000488937	0.0737282	0.000993893	0.0375751
2018-06-19T07:36:00	0.0840654	-0.00210435	0.0975681	-0.000267547	0.116563	-0.00992181	0.080118	-0.000266641	0.0736879	-0.00175059	0.0779508	0.000176393	0.0926775	0.0018503	0.086058	0.000420388	0.0925836	0.000498275	0.029848	-0.000304579	0.121229	0.000728525	0.0744829	0.00164531	-0.0421424	0.00277826	0.129239	0.000511162	0.0307791	-0.000219546	0.107404	0.000287609	0.109078	0.00200082	0.0890904	0.000621649	0.0635937	-0.0014661	0.0873259	0.000427501	0.0801803	0.000703401	0.0700055	-0.00107653	0.0739505	-0.000496701	0.0758488	0.00102248	0.038813
2018-06-19T07:39:00	0.0853014	-0.00213529	0.0996412	-0.000273232	0.118242	-0.0100647	0.0821236	-0.000273316	0.0800123	-0.00190084	0.0773189	0.000174963	0.0932225	0.00186118	0.0900104	0.000439695	0.0942718	0.000507361	0.030831	-0.000314609	0.12107	0.000727573	0.07636	0.00168677	-0.0445863	0.00293938	0.129494	0.000512169	0.0308026	-0.000219713	0.107506	0.000287882	0.108739	0.00199461	0.0905227	0.000631643	0.0613816	-0.0014151	0.0895259	0.000438272	0.0796994	0.000699182	0.0721205	-0.00110906	0.0748633	-0.000502832	0.0758553	0.00102257	0.0410605
2018-06-19T07:42:00	0.0866038	-0.00216789	0.101294	-0.000277763	0.120803	-0.0102827	0.083901	-0.000279232	0.09193	-0.00218397	0.0768829	0.000173977	0.0922041	0.00184085	0.0920047	0.000449437	0.0951608	0.000512145	0.0311003	-0.000317357	0.119641	0.000718986	0.0779806	0.00172257	-0.0471796	0.00311034	0.131224	0.000519011	0.0308232	-0.00021986	0.107249	0.000287193	0.108553	0.00199119	0.0912347	0.000636611	0.0603412	-0.00139112	0.0911168	0.00044606	0.0794516	0.000697009	0.0731197	-0.00112442	0.0765077	-0.000513877	0.0754667	0.00101733	0.042642
2018-06-19T07:45:00	0.0883521	-0.00221165	0.10335	-0.000283401	0.12336	-0.0105004	0.0861048	-0.000286566	0.0976429	-0.00231969	0.0777186	0.000175867	0.0916999	0.00183078	0.0954618	0.000466325	0.096568	0.000519719	0.0326562	-0.000333234	0.118977	0.000714995	0.0796308	0.00175902	-0.0478415	0.00315398	0.132667	0.000524721	0.0311919	-0.00022249	0.10865	0.000290946	0.110588	0.00202853	0.0928026	0.000647552	0.0614847	-0.00141748	0.0929783	0.000455173	0.0792109	0.000694897	0.0750109	-0.0011535	0.0774321	-0.000520086	0.0765048	0.00103132	0.0451593
2018-06-19T07:48:00	0.0899376	-0.00225134	0.105557	-0.000289453	0.124586	-0.0106047	0.0873495	-0.000290709	0.105607	-0.00250888	0.0770768	0.000174415	0.0915981	0.00182875	0.0972706	0.000475161	0.0977624	0.000526146	0.0337866	-0.00034477	0.117678	0.000707187	0.0811316	0.00179218	-0.0486088	0.00320456	0.134058	0.000530223	0.0315205	-0.000224834	0.107907	0.000288955	0.1115	0.00204525	0.0934752	0.000652245	0.0621661	-0.00143319	0.0942089	0.000461197	0.0789854	0.000692919	0.0772715	-0.00118827	0.0778457	-0.000522864	0.0766318	0.00103304	0.0473231
2018-06-19T07:51:00	0.0918269	-0.00229864	0.10784	-0.000295713	0.12688	-0.0108	0.0883404	-0.000294006	0.110484	-0.00262474	0.0776305	0.000175668	0.0918693	0.00183417	0.100155	0.000489248	0.0990351	0.000532996	0.0344033	-0.000351062	0.11613	0.000697887	0.0819875	0.00181108	-0.0478464	0.0031543	0.135185	0.000534678	0.032209	-0.000229745	0.108265	0.000289914	0.11121	0.00203994	0.0940566	0.000656302	0.061461	-0.00141694	0.0961456	0.000470678	0.0792129	0.000694915	0.0800211	-0.00123055	0.0786849	-0.0005285	0.0789001	0.00106361	0.0488305
2018-06-19T07:54:00	0.0930459	-0.00232915	0.108163	-0.0002966	0.128665	-0.0109519	0.0897763	-0.000298785	0.108573	-0.00257934	0.077082	0.000174427	0.0933061	0.00186285	0.102098	0.000498743	0.100734	0.000542142	0.03543	-0.00036154	0.114922	0.000690626	0.0826197	0.00182505	-0.0464955	0.00306524	0.135186	0.000534683	0.033093	-0.00023605	0.109355	0.000292832	0.111912	0.00205281	0.0948772	0.000662028	0.061117	-0.001409	0.0978835	0.000479186	0.0792521	0.000695259	0.081924	-0.00125981	0.0794733	-0.000533796	0.0806148	0.00108673	0.0506327
2018-06-19T07:57:00	0.0932723	-0.00233482	0.108672	-0.000297997	0.129679	-0.0110382	0.090922	-0.000302598	0.110757	-0.00263123	0.0779026	0.000176284	0.0926171	0.0018491	0.103626	0.000506205	0.102396	0.000551085	0.0356432	-0.000363714	0.113512	0.000682153	0.0831701	0.00183721	-0.044432	0.00292921	0.135137	0.000534488	0.0347668	-0.000247989	0.110216	0.000295138	0.1115	0.00204525	0.0950739	0.0006634	0.058735	-0.00135409	0.0992149	0.000485703	0.0789893	0.000692953	0.0844559	-0.00129875	0.07994	-0.00053693	0.0825144	0.00111234	0.0514716
2018-06-19T08:00:00	0.0940618	-0.00235458	0.109271	-0.00029964	0.130405	-0.0111001	0.092483	-0.000307794	0.107554	-0.00255514	0.0788408	0.000178407	0.0917533	0.00183185	0.10356	0.000505884	0.103835	0.000558829	0.0370391	-0.000377959	0.112082	0.00067356	0.0851625	0.00188122	-0.0414877	0.0027351	0.136531	0.000540001	0.0355484	-0.000253565	0.112281	0.000300668	0.111427	0.00204392	0.0953631	0.000665419	0.0577756	-0.00133197	0.100091	0.00048999	0.0791773	0.000694602	0.0866267	-0.00133213	0.0818133	-0.000549513	0.0848825	0.00114426	0.0530144
2018-06-19T08:03:00	0.094797	-0.00237298	0.10927	-0.000299635	0.130863	-0.011139	0.0944204	-0.000314241	0.104908	-0.00249229	0.0784337	0.000177486	0.0898211	0.00179327	0.105328	0.000514521	0.105048	0.000565358	0.0382717	-0.000390537	0.10936	0.000657198	0.0852122	0.00188231	-0.0376281	0.00248065	0.13536	0.000535372	0.0362428	-0.000258518	0.112667	0.000301703	0.10963	0.00201095	0.0953002	0.000664979	0.0574775	-0.0013251	0.100888	0.000493894	0.0788043	0.00069133	0.0882988	-0.00135784	0.0822623	-0.000552529	0.0853287	0.00115027	0.053496
2018-06-19T08:06:00	0.095446	-0.00238923	0.109897	-0.000301354	0.132236	-0.0112558	0.0968442	-0.000322308	0.102572	-0.00243678	0.0799806	0.000180986	0.0886066	0.00176903	0.106115	0.000518366	0.106722	0.000574365	0.0399962	-0.000408134	0.106589	0.000640546	0.084775	0.00187266	-0.0333071	0.00219579	0.134741	0.000532924	0.0366421	-0.000261366	0.113315	0.000303436	0.107838	0.00197808	0.0955813	0.000666941	0.0574539	-0.00132455	0.102541	0.000501985	0.0785039	0.000688695	0.0900627	-0.00138497	0.0829738	-0.000557307	0.0861044	0.00116073	0.0545673
2018-06-19T08:09:00	0.0957823	-0.00239765	0.109806	-0.000301106	0.13171	-0.0112111	0.0976332	-0.000324934	0.0929704	-0.00220868	0.0817026	0.000184883	0.0884191	0.00176528	0.109622	0.000535497	0.106879	0.000575209	0.0406336	-0.000414638	0.1036	0.000622582	0.0847791	0.00187275	-0.0283025	0.00186586	0.132418	0.000523733	0.0368993	-0.000263201	0.11315	0.000302994	0.106874	0.00196041	0.0951393	0.000663857	0.057988	-0.00133687	0.102659	0.000502565	0.0786682	0.000690136	0.091522	-0.00140741	0.0832796	-0.000559361	0.0860405	0.00115987	0.0564064
2018-06-19T08:12:00	0.0965342	-0.00241647	0.109808	-0.000301112	0.132028	-0.0112381	0.0989005	-0.000329152	0.0891779	-0.00211858	0.081189	0.000183721	0.0876517	0.00174996	0.111467	0.000544509	0.107895	0.000580681	0.0420026	-0.000428608	0.102555	0.000616303	0.0847183	0.00187141	-0.0224611	0.00148076	0.129423	0.000511888	0.0378385	-0.0002699	0.112904	0.000302335	0.106973	0.00196221	0.0945352	0.000659641	0.0591083	-0.00136269	0.102932	0.000503901	0.0787641	0.000690977	0.0936934	-0.0014408	0.0837863	-0.000562765	0.0862954	0.00116331	0.0577973
2018-06-19T08:15:00	0.0965944	-0.00241798	0.110782	-0.000303782	0.130898	-0.011142	0.100706	-0.000335159	0.0815042	-0.00193628	0.0815847	0.000184616	0.0880935	0.00175878	0.108936	0.000532147	0.108493	0.000583898	0.0433688	-0.00044255	0.100251	0.000602461	0.0839528	0.0018545	-0.0161795	0.00106664	0.12839	0.000507802	0.038223	-0.000272642	0.11274	0.000301898	0.106634	0.00195601	0.0940595	0.000656322	0.0592747	-0.00136653	0.103499	0.000506677	0.0781405	0.000685507	0.0951801	-0.00146366	0.0840185	-0.000564325	0.0875323	0.00117998	0.0593784
2018-06-19T08:18:00	0.096597	-0.00241804	0.111954	-0.000306996	0.129209	-0.0109982	0.102363	-0.000340676	0.0742622	-0.00176424	0.0801973	0.000181476	0.0877034	0.00175099	0.107477	0.000525016	0.109419	0.000588883	0.0449064	-0.000458239	0.0972427	0.000584381	0.0837915	0.00185093	-0.00988043	0.000651373	0.126032	0.000498475	0.039373	-0.000280845	0.111967	0.000299828	0.106913	0.00196111	0.0948513	0.000661847	0.0578813	-0.00133441	0.103854	0.000508414	0.0780641	0.000684837	0.0966093	-0.00148564	0.0835242	-0.000561004	0.0890071	0.00119986	0.0594449
2018-06-19T08:21:00	0.0964792	-0.00241509	0.112126	-0.000307467	0.128001	-0.0108954	0.104311	-0.000347158	0.0671443	-0.00159514	0.0813113	0.000183997	0.0878634	0.00175419	0.10705	0.000522932	0.110422	0.000594278	0.0464414	-0.000473903	0.0944274	0.000567462	0.0837421	0.00184984	-0.00203168	0.00013394	0.125922	0.000498041	0.0405386	-0.000289159	0.110696	0.000296423	0.106547	0.00195441	0.0955828	0.000666951	0.0576105	-0.00132816	0.104891	0.00051349	0.0774316	0.000679287	0.098919	-0.00152116	0.0834016	-0.000560181	0.0899328	0.00121234	0.0608571
2018-06-19T08:24:00	0.0950093	-0.0023783	0.110776	-0.000303766	0.12596	-0.0107217	0.104939	-0.000349248	0.0591948	-0.00140628	0.0820834	0.000185744	0.0867334	0.00173163	0.106538	0.00052043	0.111654	0.000600909	0.0473876	-0.000483559	0.0917266	0.000551232	0.0836054	0.00184682	0.00490751	-0.00032353	0.124124	0.000490932	0.0405474	-0.000289222	0.110708	0.000296456	0.10488	0.00192383	0.0967547	0.000675129	0.0563364	-0.00129879	0.104884	0.000513455	0.0767072	0.000672933	0.100452	-0.00154474	0.0835327	-0.000561061	0.0908081	0.00122414	0.0611986
2018-06-19T08:27:00	0.0947491	-0.00237179	0.110384	-0.000302691	0.126098	-0.0107334	0.10593	-0.000352547	0.0538115	-0.00127839	0.0821956	0.000185998	0.0864236	0.00172544	0.10802	0.000527671	0.112361	0.000604714	0.0488877	-0.000498866	0.0897648	0.000539443	0.0835799	0.00184626	0.0123337	-0.000813105	0.121788	0.000481691	0.0406903	-0.000290242	0.10987	0.000294212	0.103042	0.00189012	0.0963958	0.000672624	0.0567477	-0.00130827	0.105496	0.000516451	0.0757067	0.000664156	0.101843	-0.00156612	0.0838852	-0.000563429	0.0918531	0.00123823	0.0619347
2018-06-19T08:30:00	0.0945667	-0.00236722	0.109772	-0.000301012	0.125683	-0.0106981	0.106397	-0.000354102	0.0425984	-0.001012	0.0837186	0.000189445	0.0869744	0.00173644	0.10467	0.000511308	0.11295	0.000607887	0.050051	-0.000510737	0.0883246	0.000530788	0.0833289	0.00184071	0.0198519	-0.00130875	0.120108	0.000475047	0.0412402	-0.000294164	0.108654	0.000290955	0.10063	0.00184587	0.0957812	0.000668336	0.0598146	-0.00137898	0.105751	0.0005177	0.0743842	0.000652554	0.103067	-0.00158494	0.0835297	-0.000561042	0.0919194	0.00123912	0.0636601
2018-06-19T08:33:00	0.0937643	-0.00234713	0.109979	-0.00030158	0.124606	-0.0106064	0.106565	-0.000354659	0.0368865	-0.000876306	0.0832114	0.000188297	0.0873722	0.00174438	0.105523	0.000515475	0.113468	0.000610672	0.0504396	-0.000514702	0.087357	0.000524973	0.0825859	0.0018243	0.0269494	-0.00177665	0.116867	0.000462226	0.0427014	-0.000304587	0.106102	0.000284121	0.0975103	0.00178864	0.0942993	0.000657995	0.0605307	-0.00139549	0.105237	0.000515182	0.0733546	0.000643521	0.104818	-0.00161187	0.0826471	-0.000555113	0.089592	0.00120775	0.063882
2018-06-19T08:36:00	0.0929408	-0.00232652	0.109587	-0.000300504	0.122968	-0.010467	0.107118	-0.000356499	0.0286252	-0.000680044	0.0827919	0.000187348	0.0884976	0.00176685	0.102096	0.00049873	0.114574	0.000616625	0.0512231	-0.000522697	0.086879	0.0005221	0.0824263	0.00182078	0.035121	-0.00231537	0.11405	0.000451086	0.0433504	-0.000309216	0.103177	0.000276288	0.0943073	0.00172989	0.0923429	0.000644344	0.0616404	-0.00142107	0.105588	0.000516902	0.0725405	0.000636379	0.106923	-0.00164424	0.0823901	-0.000553387	0.088301	0.00119034	0.0641356
2018-06-19T08:39:00	0.091992	-0.00230277	0.107817	-0.000295652	0.120802	-0.0102826	0.107032	-0.000356215	0.0192853	-0.000458159	0.0814435	0.000184297	0.0883211	0.00176333	0.0981508	0.00047946	0.116092	0.000624794	0.0519254	-0.000529863	0.085316	0.000512707	0.0817813	0.00180653	0.0424771	-0.00280032	0.111116	0.000439481	0.043688	-0.000311624	0.0996569	0.000266863	0.0916728	0.00168156	0.0908056	0.000633617	0.0636657	-0.00146776	0.104411	0.00051114	0.0720426	0.000632011	0.1082	-0.00166389	0.0814767	-0.000547252	0.0872247	0.00117583	0.0636741
2018-06-19T08:42:00	0.0907842	-0.00227254	0.10582	-0.000290176	0.117998	-0.0100439	0.106609	-0.000354806	0.0155781	-0.000370087	0.0812971	0.000183965	0.0877456	0.00175184	0.0960381	0.00046914	0.116105	0.000624863	0.0527923	-0.00053871	0.0834923	0.000501748	0.0808776	0.00178656	0.0494499	-0.00326001	0.10897	0.000430995	0.0442051	-0.000315312	0.0960762	0.000257274	0.0909017	0.00166742	0.0892801	0.000622973	0.0613132	-0.00141353	0.103742	0.000507866	0.0717965	0.000629853	0.108913	-0.00167485	0.0822325	-0.000552329	0.0864328	0.00116516	0.0638092
2018-06-19T08:45:00	0.0896504	-0.00224415	0.104723	-0.000287168	0.117651	-0.0100144	0.105856	-0.000352301	0.00603796	-0.000143443	0.0807504	0.000182728	0.086472	0.00172641	0.0906392	0.000442766	0.117313	0.000631363	0.0533992	-0.000544903	0.0812468	0.000488253	0.0800453	0.00176818	0.0552295	-0.00364103	0.106049	0.000419441	0.0450275	-0.000321178	0.091286	0.000244447	0.0894635	0.00164104	0.0880047	0.000614073	0.0615487	-0.00141896	0.102707	0.0005028	0.0712654	0.000625193	0.109894	-0.00168993	0.0823586	-0.000553175	0.0858168	0.00115685	0.0645854
2018-06-19T08:48:00	0.088486	-0.002215	0.104056	-0.000285338	0.116307	-0.00989999	0.104577	-0.000348043	-0.000399465	9.49e-06	0.0797988	0.000180575	0.0853221	0.00170345	0.0886571	0.000433084	0.117525	0.000632507	0.0546038	-0.000557195	0.079753	0.000479277	0.0790065	0.00174523	0.0601716	-0.00396685	0.102462	0.000405254	0.0466553	-0.00033279	0.0860576	0.000230447	0.0882083	0.00161801	0.0877012	0.000611956	0.0607	-0.00139939	0.10066	0.000492779	0.0710839	0.000623601	0.110575	-0.00170041	0.0816869	-0.000548664	0.0845885	0.0011403	0.0651314
2018-06-19T08:51:00	0.0876445	-0.00219394	0.103664	-0.000284263	0.116205	-0.00989129	0.104072	-0.000346363	-0.00534608	0.000127006	0.0796583	0.000180257	0.0849857	0.00169674	0.0866078	0.000423074	0.117786	0.000633914	0.056319	-0.000574697	0.0783315	0.000470734	0.0789465	0.00174391	0.0650868	-0.00429088	0.0981128	0.000388052	0.0474747	-0.000338634	0.0806067	0.00021585	0.0869065	0.00159414	0.0877006	0.000611952	0.0596743	-0.00137574	0.100046	0.000489773	0.0706488	0.000619784	0.110379	-0.0016974	0.081961	-0.000550505	0.0844454	0.00113837	0.0661766
2018-06-19T08:54:00	0.0866429	-0.00216887	0.10222	-0.000280304	0.11471	-0.0097641	0.102636	-0.000341585	-0.0149206	0.000354466	0.0785596	0.000177771	0.0847811	0.00169265	0.0811326	0.000396328	0.117832	0.000634157	0.0571871	-0.000583556	0.0785666	0.000472147	0.0783303	0.00173029	0.0698552	-0.00460524	0.0952687	0.000376803	0.0484715	-0.000345745	0.0754927	0.000202156	0.0846936	0.00155354	0.0869095	0.000606431	0.0604175	-0.00139288	0.0987658	0.000483505	0.069152	0.000606652	0.11062	-0.0017011	0.0819442	-0.000550392	0.0834343	0.00112474	0.0658132
2018-06-19T08:57:00	0.0848281	-0.00212344	0.100777	-0.000276347	0.112738	-0.00959618	0.100535	-0.000334593	-0.0194619	0.000462353	0.0777884	0.000176025	0.0841107	0.00167927	0.0785643	0.000383781	0.117816	0.000634071	0.0580442	-0.000592302	0.0791558	0.000475687	0.0771611	0.00170447	0.0714365	-0.00470949	0.0922787	0.000364977	0.0492564	-0.000351343	0.0706716	0.000189246	0.0838833	0.00153868	0.0860568	0.000600481	0.0625868	-0.00144289	0.0980549	0.000480025	0.0686354	0.000602121	0.111057	-0.00170782	0.0812616	-0.000545807	0.0818799	0.00110378	0.0657455
2018-06-19T09:00:00	0.0841634	-0.0021068	0.0999697	-0.000274133	0.112114	-0.00954306	0.100734	-0.000335254	-0.0224915	0.000534326	0.0766515	0.000173453	0.0838762	0.00167459	0.0729429	0.000356321	0.118009	0.000635109	0.0590569	-0.000602636	0.0795765	0.000478216	0.0764826	0.00168948	0.0719223	-0.00474151	0.0895051	0.000354007	0.0504842	-0.000360101	0.0664237	0.000177871	0.0843418	0.00154709	0.0861582	0.000601189	0.0611424	-0.00140959	0.0976968	0.000478272	0.0679733	0.000596312	0.111821	-0.00171956	0.082104	-0.000551465	0.0800839	0.00107957	0.0656379
2018-06-19T09:03:00	0.0825944	-0.00206752	0.0989788	-0.000271416	0.110907	-0.00944035	0.100386	-0.000334096	-0.0298869	0.000710017	0.0757917	0.000171507	0.0824719	0.00164655	0.0675141	0.000329802	0.11768	0.000633343	0.0596123	-0.000608303	0.0800196	0.000480879	0.0763935	0.00168751	0.0712559	-0.00469759	0.087044	0.000344273	0.0517088	-0.000368836	0.0620318	0.00016611	0.0850798	0.00156063	0.085776	0.000598522	0.0609307	-0.00140471	0.0966976	0.00047338	0.0663495	0.000582067	0.110958	-0.0017063	0.0818786	-0.000549951	0.0786069	0.00105966	0.0658944
2018-06-19T09:06:00	0.0815468	-0.0020413	0.0987148	-0.000270692	0.109944	-0.0093584	0.0996331	-0.00033159	-0.0313569	0.000744941	0.0758299	0.000171594	0.0812597	0.00162235	0.0638658	0.00031198	0.117396	0.000631812	0.0601821	-0.000614118	0.0798167	0.00047966	0.0767207	0.00169474	0.0699932	-0.00461434	0.0851788	0.000336896	0.052008	-0.00037097	0.0585519	0.000156791	0.0855928	0.00157004	0.0878577	0.000613048	0.0590819	-0.00136209	0.0960019	0.000469974	0.0649133	0.000569467	0.110402	-0.00169774	0.0822262	-0.000552286	0.0787319	0.00106135	0.066385
2018-06-19T09:09:00	0.0816285	-0.00204335	0.0994676	-0.000272756	0.110274	-0.00938644	0.0992786	-0.00033041	-0.029014	0.000689281	0.0753234	0.000170447	0.0802601	0.00160239	0.061	0.000297981	0.117692	0.000633406	0.0617824	-0.000630448	0.0791118	0.000475423	0.076931	0.00169938	0.0684006	-0.00450934	0.0821299	0.000324837	0.0526482	-0.000375537	0.0555611	0.000148783	0.0868034	0.00159224	0.0881636	0.000615182	0.0571735	-0.00131809	0.0954181	0.000467116	0.0636204	0.000558125	0.110023	-0.00169191	0.0825252	-0.000554295	0.0784705	0.00105782	0.0666651
2018-06-19T09:12:00	0.0814453	-0.00203876	0.0997828	-0.00027362	0.110119	-0.00937328	0.0983511	-0.000327323	-0.0316665	0.000752295	0.0747415	0.000169131	0.0792286	0.0015818	0.0539105	0.000263349	0.117792	0.000633942	0.0632113	-0.000645028	0.0800913	0.00048131	0.0767003	0.00169429	0.0676157	-0.0044576	0.0788999	0.000312062	0.0531003	-0.000378761	0.0529648	0.00014183	0.0873983	0.00160316	0.088295	0.000616099	0.0552137	-0.00127291	0.0945687	0.000462958	0.0634935	0.000557013	0.109703	-0.00168699	0.0826325	-0.000555015	0.0786811	0.00106066	0.0672813
2018-06-19T09:15:00	0.0820602	-0.00205415	0.100629	-0.00027594	0.109713	-0.00933871	0.0988741	-0.000329064	-0.0233211	0.000554036	0.0737271	0.000166835	0.0788871	0.00157498	0.0478175	0.000233586	0.118356	0.000636981	0.0640571	-0.00065366	0.0815476	0.000490061	0.0766445	0.00169306	0.0673379	-0.00443929	0.0771158	0.000305006	0.054853	-0.000391263	0.0512629	0.000137273	0.0883666	0.00162092	0.0885098	0.000617598	0.0528608	-0.00121866	0.0939333	0.000459848	0.0629902	0.000552597	0.109778	-0.00168815	0.0826071	-0.000554845	0.0782809	0.00105527	0.0666631
2018-06-19T09:18:00	0.0828618	-0.00207422	0.102064	-0.000279876	0.110032	-0.00936592	0.100035	-0.000332927	-0.014933	0.00035476	0.0743564	0.000168259	0.0778551	0.00155437	0.0414647	0.000202553	0.118077	0.000635477	0.0650677	-0.000663972	0.0820322	0.000492973	0.0767407	0.00169518	0.0676443	-0.00445949	0.076493	0.000302542	0.0560941	-0.000400116	0.0506946	0.000135751	0.0889554	0.00163172	0.0891109	0.000621792	0.0511638	-0.00117954	0.0944913	0.00046258	0.0629979	0.000552665	0.110372	-0.00169728	0.083452	-0.00056052	0.0787995	0.00106226	0.0668186
2018-06-19T09:21:00	0.0832168	-0.00208311	0.103718	-0.000284412	0.110857	-0.00943609	0.100718	-0.0003352	-0.0106506	0.000253025	0.0745656	0.000168733	0.077301	0.00154331	0.0299347	0.000146229	0.118689	0.000638771	0.0662904	-0.000676449	0.0828535	0.000497909	0.0778909	0.00172059	0.0683413	-0.00450543	0.0770762	0.000304849	0.0569638	-0.000406319	0.0502074	0.000134446	0.0883378	0.00162039	0.0906404	0.000632465	0.0528016	-0.0012173	0.0950107	0.000465122	0.0624323	0.000547703	0.111148	-0.00170922	0.083647	-0.000561829	0.0791574	0.00106708	0.0673551
2018-06-19T09:24:00	0.0828323	-0.00207348	0.103622	-0.000284149	0.111395	-0.00948188	0.10028	-0.000333744	-0.00471866	0.0001121	0.0760675	0.000172131	0.0772061	0.00154142	0.0222276	0.00010858	0.118959	0.000640226	0.0668826	-0.000682492	0.0833058	0.000500627	0.0789172	0.00174326	0.0690307	-0.00455089	0.0765502	0.000302769	0.0572461	-0.000408333	0.0503446	0.000134814	0.0869204	0.00159439	0.0931044	0.000649658	0.0529282	-0.00122022	0.0951961	0.00046603	0.0629565	0.000552301	0.112262	-0.00172635	0.0837776	-0.000562707	0.0796992	0.00107439	0.067249
2018-06-19T09:27:00	0.0835144	-0.00209055	0.104079	-0.000285402	0.11167	-0.00950531	0.100927	-0.000335895	0.00732676	-0.000174061	0.0780354	0.000176584	0.0770101	0.0015375	0.0147625	7.2114e-05	0.119709	0.000644258	0.0675005	-0.000688797	0.0838087	0.000503649	0.0799104	0.0017652	0.0693856	-0.00457428	0.0778183	0.000307784	0.0574821	-0.000410017	0.0508982	0.000136296	0.0862304	0.00158173	0.0949355	0.000662435	0.0498638	-0.00114957	0.0956674	0.000468337	0.0630792	0.000553378	0.113221	-0.00174109	0.0847036	-0.000568926	0.0787375	0.00106142	0.0674514
2018-06-19T09:30:00	0.0843	-0.00211022	0.105174	-0.000288403	0.11413	-0.00971466	0.101833	-0.00033891	0.017555	-0.000417051	0.0788522	0.000178433	0.0763242	0.00152381	0.0102764	5.01995e-05	0.119599	0.000643671	0.0691167	-0.000705289	0.0851059	0.000511445	0.0813046	0.001796	0.0692464	-0.00456511	0.0794839	0.000314372	0.0587557	-0.000419101	0.0515946	0.000138161	0.0876713	0.00160816	0.097167	0.000678005	0.0504108	-0.00116218	0.0968069	0.000473916	0.063714	0.000558947	0.115359	-0.00177397	0.0856439	-0.000575242	0.0792374	0.00106816	0.0680438
2018-06-19T09:33:00	0.0854616	-0.0021393	0.105971	-0.00029059	0.116191	-0.00989017	0.102457	-0.000340989	0.0269253	-0.000639659	0.0790723	0.000178931	0.0761615	0.00152056	0.00525869	2.56884e-05	0.121152	0.000652024	0.0707664	-0.000722123	0.0883568	0.000530981	0.0826846	0.00182648	0.0699384	-0.00461073	0.0806643	0.00031904	0.0597937	-0.000426505	0.0520832	0.000139469	0.0886215	0.00162559	0.0988329	0.00068963	0.0516271	-0.00119022	0.0976063	0.000477829	0.0644582	0.000565476	0.116786	-0.00179591	0.0861253	-0.000578476	0.0808096	0.00108935	0.06813
2018-06-19T09:36:00	0.0874253	-0.00218845	0.106237	-0.000291319	0.118669	-0.0101011	0.10238	-0.00034073	0.0404315	-0.000960525	0.079919	0.000180847	0.0748908	0.00149519	0.00151625	7.4068e-06	0.122015	0.000656673	0.0724478	-0.000739281	0.091279	0.000548542	0.0840342	0.00185629	0.0708202	-0.00466886	0.0818717	0.000323816	0.0613439	-0.000437562	0.0527911	0.000141365	0.0904383	0.00165892	0.0998284	0.000696576	0.0513411	-0.00118363	0.0979705	0.000479612	0.0656597	0.000576015	0.118265	-0.00181865	0.0872663	-0.000586139	0.0813887	0.00109716	0.0680143
2018-06-19T09:39:00	0.0892213	-0.00223341	0.107586	-0.000295019	0.12112	-0.0103097	0.103817	-0.000345513	0.0528174	-0.00125478	0.0817268	0.000184938	0.0753198	0.00150376	-0.000826274	-4.0363e-06	0.123104	0.000662531	0.0750161	-0.000765488	0.0948899	0.000570242	0.0852347	0.00188281	0.0724017	-0.00477312	0.0831033	0.000328687	0.0624548	-0.000445487	0.0541708	0.000145059	0.091782	0.00168357	0.101582	0.00070881	0.0544028	-0.00125421	0.10019	0.000490479	0.066899	0.000586887	0.121323	-0.00186568	0.0882865	-0.000592991	0.0832457	0.00112219	0.069128
2018-06-19T09:42:00	0.0915919	-0.00229275	0.107756	-0.000295485	0.124585	-0.0106046	0.10589	-0.000352413	0.0629788	-0.00149618	0.0828882	0.000187566	0.0751602	0.00150057	-0.00141678	-6.9209e-06	0.12452	0.00067015	0.0760318	-0.000775853	0.0977343	0.000587336	0.0871716	0.0019256	0.0730506	-0.0048159	0.0847515	0.000335206	0.0647045	-0.000461533	0.0570473	0.000152762	0.0943211	0.00173014	0.102731	0.000716831	0.0583251	-0.00134464	0.102966	0.000504069	0.067653	0.000593502	0.123989	-0.00190669	0.0897913	-0.000603099	0.0847145	0.00114199	0.0697308
2018-06-19T09:45:00	0.0935551	-0.0023419	0.107744	-0.000295451	0.127734	-0.0108727	0.107522	-0.000357845	0.0761048	-0.00180801	0.0841237	0.000190361	0.0752075	0.00150151	-0.00172131	-8.4085e-06	0.124887	0.000672129	0.0773624	-0.000789431	0.0994919	0.000597898	0.0880872	0.00194582	0.0727564	-0.00479651	0.0852924	0.000337345	0.0654024	-0.000466511	0.0602441	0.000161323	0.0953138	0.00174835	0.103257	0.000720499	0.060033	-0.00138401	0.105055	0.000514294	0.0685782	0.000601619	0.126372	-0.00194332	0.0906157	-0.000608636	0.0854512	0.00115193	0.070458
2018-06-19T09:48:00	0.0954928	-0.0023904	0.109309	-0.000299743	0.131685	-0.011209	0.109488	-0.000364386	0.0886298	-0.00210556	0.0856499	0.000193815	0.0752795	0.00150295	-0.00145981	-7.1311e-06	0.125922	0.0006777	0.0798926	-0.00081525	0.102547	0.00061626	0.0892595	0.00197172	0.073813	-0.00486616	0.0888211	0.000351302	0.0663506	-0.000473275	0.0633239	0.00016957	0.0968866	0.0017772	0.105222	0.000734209	0.0612709	-0.00141255	0.107078	0.000524199	0.0699153	0.000613348	0.129188	-0.00198663	0.0930816	-0.000625199	0.0854864	0.0011524	0.0724052
2018-06-19T09:51:00	0.0965689	-0.00241734	0.111417	-0.000305522	0.13468	-0.0114639	0.110704	-0.000368435	0.0986407	-0.00234339	0.0881753	0.00019953	0.0751768	0.0015009	0.000374229	1.8281e-06	0.127206	0.00068461	0.0816429	-0.00083311	0.105777	0.000635668	0.0915787	0.00202295	0.074897	-0.00493763	0.0901746	0.000356655	0.0668187	-0.000476614	0.0674655	0.00018066	0.0987866	0.00181205	0.107061	0.000747044	0.0635013	-0.00146397	0.108519	0.000531252	0.0708892	0.000621893	0.131078	-0.0020157	0.0949598	-0.000637814	0.0877138	0.00118243	0.0742489
2018-06-19T09:54:00	0.0995678	-0.00249241	0.112377	-0.000308156	0.137695	-0.0117205	0.113238	-0.000376867	0.113279	-0.00269114	0.0908222	0.000205519	0.0752272	0.00150191	0.00252253	1.23224e-05	0.127547	0.000686445	0.0833519	-0.00085055	0.108273	0.000650668	0.0938031	0.00207208	0.0746691	-0.0049226	0.090518	0.000358013	0.067526	-0.000481659	0.0706675	0.000189235	0.101482	0.00186149	0.108517	0.000757206	0.0668798	-0.00154186	0.10988	0.000537914	0.071502	0.000627269	0.132718	-0.00204091	0.0968736	-0.000650668	0.0877363	0.00118273	0.0769773
2018-06-19T09:57:00	0.103277	-0.00258525	0.113763	-0.000311957	0.140249	-0.0119379	0.115607	-0.000384751	0.124047	-0.00294697	0.0931063	0.000210688	0.0768304	0.00153392	0.0042405	2.07146e-05	0.128403	0.000691051	0.0854814	-0.00087228	0.112318	0.000674977	0.0957748	0.00211564	0.0759	-0.00500375	0.0912169	0.000360778	0.069465	-0.00049549	0.0744009	0.000199232	0.105394	0.00193325	0.109698	0.000765444	0.0684059	-0.00157704	0.112079	0.000548682	0.0729503	0.000639974	0.135421	-0.00208248	0.0986687	-0.000662725	0.0880849	0.00118743	0.0782433
2018-06-19T10:00:00	0.105952	-0.00265223	0.115527	-0.000316794	0.142386	-0.0121199	0.117168	-0.000389947	0.13145	-0.00312284	0.0951779	0.000215376	0.078241	0.00156208	0.00597588	2.91918e-05	0.130249	0.000700987	0.086892	-0.000886675	0.116707	0.000701353	0.0979226	0.00216308	0.0769725	-0.00507445	0.0913879	0.000361454	0.0711896	-0.000507791	0.0793474	0.000212478	0.108608	0.0019922	0.111371	0.000777119	0.0704534	-0.00162425	0.114122	0.00055868	0.0749765	0.000657749	0.138019	-0.00212243	0.0997311	-0.000669861	0.0889855	0.00119957	0.0798504
2018-06-19T10:03:00	0.10916	-0.00273252	0.11567	-0.000317186	0.14495	-0.0123381	0.120178	-0.000399966	0.147147	-0.00349576	0.0974118	0.000220431	0.0788245	0.00157373	0.0117313	5.73065e-05	0.130468	0.000702163	0.0868833	-0.000886586	0.120197	0.000722323	0.100421	0.00221827	0.0777765	-0.00512746	0.091537	0.000362044	0.0715096	-0.000510074	0.083714	0.000224171	0.11121	0.00203993	0.113056	0.000788872	0.0745924	-0.00171967	0.116118	0.000568453	0.0775481	0.000680309	0.140442	-0.00215969	0.101234	-0.000679955	0.0903004	0.0012173	0.0800566
2018-06-19T10:06:00	0.111363	-0.00278768	0.115571	-0.000316914	0.146625	-0.0124806	0.123288	-0.000410316	0.156817	-0.00372547	0.099747	0.000225715	0.0796883	0.00159097	0.0194212	9.48715e-05	0.13195	0.000710141	0.0875766	-0.00089366	0.123486	0.000742092	0.102246	0.00225858	0.0789088	-0.0052021	0.0925972	0.000366237	0.0726519	-0.000518222	0.088308	0.000236473	0.113848	0.00208832	0.114422	0.000798406	0.0773038	-0.00178218	0.117578	0.000575598	0.0790094	0.000693129	0.14233	-0.00218872	0.103012	-0.000691896	0.0916517	0.00123551	0.0813775
2018-06-19T10:09:00	0.113001	-0.00282868	0.114361	-0.000313597	0.14873	-0.0126598	0.125698	-0.000418337	0.168773	-0.00400951	0.102347	0.000231597	0.0803635	0.00160445	0.0272686	0.000133205	0.132694	0.000714144	0.0886285	-0.000904394	0.12552	0.000754314	0.103463	0.00228548	0.0789291	-0.00520344	0.0931285	0.000368338	0.0726469	-0.000518186	0.0926302	0.000248047	0.114905	0.00210772	0.115748	0.000807662	0.0802316	-0.00184968	0.118466	0.000579949	0.0819333	0.00071878	0.144036	-0.00221496	0.104032	-0.000698751	0.093707	0.00126322	0.0818062
2018-06-19T10:12:00	0.114935	-0.00287707	0.114983	-0.000315303	0.14898	-0.0126811	0.128351	-0.000427167	0.179826	-0.00427209	0.103972	0.000235276	0.0819319	0.00163577	0.0361155	0.000176422	0.134014	0.000721246	0.0889493	-0.000907668	0.12838	0.000771499	0.104521	0.00230883	0.0796296	-0.00524962	0.0925875	0.000366199	0.072903	-0.000520013	0.0984849	0.000263725	0.117149	0.00214888	0.11768	0.000821137	0.0845465	-0.00194915	0.119895	0.000586944	0.0842199	0.000738839	0.145399	-0.00223593	0.105907	-0.000711341	0.0959478	0.00129343	0.0830018
2018-06-19T10:15:00	0.116057	-0.00290517	0.114913	-0.000315111	0.150991	-0.0128523	0.131188	-0.000436607	0.187217	-0.00444769	0.107114	0.000242386	0.0849437	0.0016959	0.0450023	0.000219833	0.134825	0.000725614	0.0898492	-0.000916851	0.131289	0.000788983	0.10538	0.00232783	0.0813876	-0.00536552	0.0923535	0.000365273	0.0737255	-0.000525879	0.102512	0.000274507	0.116828	0.00214298	0.118915	0.000829755	0.0893171	-0.00205914	0.120652	0.00059065	0.0867555	0.000761083	0.146552	-0.00225365	0.108202	-0.000726754	0.0988468	0.0013325	0.0856958
2018-06-19T10:18:00	0.117171	-0.00293306	0.114397	-0.000313695	0.151386	-0.0128859	0.134207	-0.000446656	0.198089	-0.00470596	0.108253	0.000244962	0.0872102	0.00174115	0.0547517	0.000267458	0.135561	0.000729572	0.0913893	-0.000932566	0.132402	0.000795673	0.105976	0.00234097	0.0830176	-0.00547298	0.0906989	0.000358729	0.0751799	-0.000536254	0.105219	0.000281757	0.116482	0.00213665	0.119479	0.000833694	0.091701	-0.00211409	0.120633	0.000590555	0.0894684	0.000784883	0.147261	-0.00226455	0.109733	-0.000737044	0.099011	0.00133472	0.0876824
2018-06-19T10:21:00	0.117319	-0.00293675	0.114449	-0.000313837	0.151421	-0.0128889	0.136354	-0.000453802	0.20167	-0.00479105	0.109199	0.000247104	0.0902776	0.00180239	0.0649857	0.000317451	0.135634	0.000729968	0.0920805	-0.00093962	0.134028	0.000805446	0.10739	0.00237222	0.0853664	-0.00562783	0.0897924	0.000355144	0.0766777	-0.000546937	0.108686	0.000291041	0.117715	0.00215926	0.120467	0.000840585	0.0944346	-0.00217712	0.121004	0.000592371	0.0915072	0.000802769	0.147047	-0.00226127	0.110727	-0.000743718	0.100694	0.00135741	0.0887866
2018-06-19T10:24:00	0.116879	-0.00292575	0.113784	-0.000312016	0.150422	-0.0128038	0.136764	-0.000455166	0.201926	-0.00479712	0.109791	0.000248442	0.0927485	0.00185172	0.0763772	0.000373098	0.13657	0.000735003	0.0917467	-0.000936214	0.134865	0.000810473	0.108796	0.00240328	0.0877073	-0.00578215	0.0881645	0.000348705	0.0783101	-0.000558581	0.110082	0.000294779	0.118429	0.00217236	0.120929	0.000843808	0.098993	-0.0022822	0.120505	0.000589927	0.0928695	0.00081472	0.146902	-0.00225903	0.112023	-0.00075242	0.102096	0.0013763	0.0902713
2018-06-19T10:27:00	0.116754	-0.00292262	0.113252	-0.000310555	0.150709	-0.0128283	0.138342	-0.000460418	0.200896	-0.00477265	0.111583	0.000252499	0.0955472	0.0019076	0.087924	0.000429503	0.137351	0.000739207	0.0923489	-0.000942358	0.13637	0.000819519	0.109887	0.00242737	0.0918749	-0.0060569	0.0868014	0.000343314	0.0794499	-0.000566711	0.112974	0.000302525	0.119303	0.00218839	0.122467	0.00085454	0.0996225	-0.00229672	0.120392	0.000589376	0.0942794	0.000827088	0.147279	-0.00226483	0.113706	-0.000763724	0.102357	0.00137983	0.0915651
2018-06-19T10:30:00	0.116304	-0.00291134	0.113098	-0.000310132	0.15043	-0.0128046	0.139211	-0.000463308	0.193958	-0.00460782	0.113419	0.000256653	0.097747	0.00195152	0.0980059	0.000478752	0.137743	0.00074132	0.0922014	-0.000940853	0.138113	0.000829991	0.11075	0.00244644	0.0943342	-0.00621903	0.0862023	0.000340944	0.0796484	-0.000568128	0.11451	0.000306637	0.120947	0.00221855	0.123441	0.000861338	0.102107	-0.00235399	0.119341	0.000584229	0.0965108	0.000846665	0.14682	-0.00225777	0.116443	-0.000782111	0.103812	0.00139944	0.0937595
2018-06-19T10:33:00	0.115139	-0.00288218	0.112369	-0.000308134	0.148849	-0.01267	0.139286	-0.00046356	0.192005	-0.00456144	0.112807	0.000255268	0.100372	0.00200392	0.110068	0.000537677	0.137686	0.000741009	0.0928917	-0.000947897	0.139118	0.000836031	0.112275	0.00248012	0.097555	-0.00643136	0.0851636	0.000336836	0.0809486	-0.000577401	0.114151	0.000305675	0.121569	0.00222996	0.124412	0.000868112	0.103113	-0.0023772	0.118202	0.000578656	0.0972285	0.000852961	0.146588	-0.00225421	0.117328	-0.000788056	0.104584	0.00140985	0.0954468
2018-06-19T10:36:00	0.115216	-0.00288411	0.112604	-0.000308779	0.147111	-0.012522	0.139229	-0.000463371	0.180814	-0.00429558	0.113202	0.000256163	0.10409	0.00207815	0.119381	0.000583168	0.138671	0.000746312	0.0930717	-0.000949734	0.140127	0.000842094	0.113024	0.00249667	0.100147	-0.00660222	0.0842675	0.000333292	0.0822795	-0.000586895	0.113869	0.000304921	0.122664	0.00225004	0.125571	0.000876203	0.104901	-0.00241842	0.117304	0.000574261	0.0977061	0.00085715	0.145684	-0.0022403	0.118036	-0.000792812	0.105534	0.00142266	0.0967399
2018-06-19T10:39:00	0.11452	-0.0028667	0.11303	-0.000309945	0.145478	-0.0123831	0.137766	-0.000458502	0.165067	-0.00392147	0.110304	0.000249604	0.107787	0.00215196	0.127644	0.000623534	0.138469	0.000745223	0.0940043	-0.00095925	0.141873	0.000852586	0.114116	0.00252079	0.102161	-0.00673504	0.083422	0.000329948	0.0840051	-0.000599203	0.112007	0.000299934	0.121431	0.00222741	0.125208	0.000873671	0.104121	-0.00240044	0.115896	0.000567364	0.0972863	0.000853467	0.144746	-0.00222587	0.119244	-0.000800923	0.106122	0.00143058	0.0977247
2018-06-19T10:42:00	0.114931	-0.00287697	0.112249	-0.000307804	0.143867	-0.0122459	0.137518	-0.000457675	0.153205	-0.00363967	0.108987	0.000246624	0.112129	0.00223864	0.134873	0.000658845	0.138347	0.000744566	0.0941487	-0.000960724	0.143112	0.000860032	0.116122	0.0025651	0.104474	-0.0068875	0.0828387	0.00032764	0.0853517	-0.000608809	0.110352	0.000295503	0.120744	0.00221482	0.125438	0.000875276	0.103567	-0.00238764	0.114602	0.000561031	0.0967741	0.000848974	0.143389	-0.00220501	0.120265	-0.000807778	0.10503	0.00141586	0.0995508
2018-06-19T10:45:00	0.11461	-0.00286895	0.111659	-0.000306188	0.143381	-0.0122045	0.136802	-0.000455292	0.147628	-0.00350717	0.107002	0.000242133	0.114617	0.00228833	0.142321	0.000695231	0.138532	0.000745565	0.0943158	-0.000962429	0.142686	0.000857473	0.116757	0.00257913	0.106149	-0.00699796	0.0820116	0.000324369	0.0863483	-0.000615917	0.108862	0.000291513	0.122108	0.00223983	0.126156	0.000880282	0.101593	-0.00234214	0.113786	0.000557034	0.0962085	0.000844013	0.141968	-0.00218316	0.121934	-0.000818993	0.103761	0.00139876	0.0996127
2018-06-19T10:48:00	0.115238	-0.00288468	0.112057	-0.000307277	0.143403	-0.0122064	0.135789	-0.00045192	0.137372	-0.00326353	0.106311	0.00024057	0.117198	0.00233986	0.149646	0.00073101	0.137943	0.000742391	0.0947616	-0.000966978	0.143271	0.000860991	0.118479	0.00261717	0.108542	-0.0071557	0.082306	0.000325534	0.0877226	-0.00062572	0.10654	0.000285296	0.122966	0.00225557	0.126477	0.000882526	0.101417	-0.0023381	0.114421	0.000560144	0.0952354	0.000835475	0.141761	-0.00217997	0.123183	-0.000827377	0.102976	0.00138816	0.101992
2018-06-19T10:51:00	0.115678	-0.00289567	0.112259	-0.000307833	0.143534	-0.0122175	0.134702	-0.000448302	0.131059	-0.00311354	0.105237	0.000238139	0.120584	0.00240745	0.151575	0.000740435	0.137927	0.000742306	0.0955889	-0.00097542	0.144013	0.000865447	0.119702	0.00264418	0.110646	-0.00729439	0.0832118	0.000329116	0.0885983	-0.000631966	0.10364	0.00027753	0.124243	0.00227901	0.127283	0.000888149	0.0996534	-0.00229743	0.114307	0.000559588	0.0949871	0.000833298	0.141416	-0.00217467	0.125125	-0.000840425	0.100847	0.00135947	0.103622
2018-06-19T10:54:00	0.116692	-0.00292106	0.113613	-0.000311545	0.145949	-0.0124231	0.135134	-0.000449741	0.125448	-0.00298026	0.104108	0.000235583	0.124054	0.00247674	0.149735	0.000731445	0.138006	0.000742732	0.0960163	-0.000979782	0.144485	0.000868283	0.121379	0.00268123	0.112387	-0.00740918	0.0849364	0.000335937	0.0893867	-0.00063759	0.100969	0.000270375	0.12481	0.00228941	0.126884	0.000885361	0.100152	-0.00230893	0.114697	0.000561496	0.0952021	0.000835184	0.141753	-0.00217985	0.127057	-0.000853398	0.101845	0.00137293	0.104564
2018-06-19T10:57:00	0.117749	-0.00294752	0.114441	-0.000313817	0.147403	-0.0125468	0.134468	-0.000447524	0.115445	-0.0027426	0.103763	0.000234803	0.128834	0.00257216	0.147884	0.000722401	0.138268	0.000744142	0.0958682	-0.000978271	0.145595	0.000874956	0.122091	0.00269696	0.114244	-0.00753158	0.0870468	0.000344284	0.0906288	-0.00064645	0.0989068	0.000264854	0.126579	0.00232184	0.126577	0.000883224	0.0994655	-0.0022931	0.114738	0.000561699	0.0953432	0.000836421	0.141663	-0.00217847	0.128742	-0.000864717	0.102319	0.00137931	0.106712
2018-06-19T11:00:00	0.118571	-0.0029681	0.115462	-0.000316615	0.148751	-0.0126617	0.133146	-0.000443125	0.1107	-0.00262989	0.102864	0.000232768	0.133191	0.00265915	0.146913	0.000717659	0.137778	0.000741508	0.0954536	-0.000974039	0.147205	0.000884628	0.123037	0.00271786	0.115759	-0.00763146	0.0893467	0.000353381	0.0915888	-0.000653298	0.0968437	0.00025933	0.128103	0.0023498	0.125617	0.000876525	0.0986445	-0.00227417	0.114876	0.000562374	0.0955507	0.000838242	0.142252	-0.00218752	0.129793	-0.000871778	0.102473	0.00138139	0.107354
2018-06-19T11:03:00	0.119998	-0.00300383	0.117867	-0.000323211	0.149568	-0.0127311	0.132307	-0.000440333	0.100722	-0.00239283	0.103683	0.000234621	0.137578	0.00274673	0.140265	0.000685186	0.137897	0.000742145	0.0955821	-0.000975351	0.148521	0.000892539	0.125471	0.00277161	0.116912	-0.0077075	0.093436	0.000369554	0.0943298	-0.000672849	0.0968613	0.000259377	0.129104	0.00236817	0.125222	0.000873769	0.0986627	-0.00227459	0.115729	0.000566549	0.0958192	0.000840597	0.142866	-0.00219697	0.132439	-0.000889549	0.102864	0.00138666	0.109391
2018-06-19T11:06:00	0.120593	-0.00301871	0.11964	-0.000328073	0.14959	-0.012733	0.131728	-0.000438405	0.0939677	-0.00223237	0.102943	0.000232946	0.140431	0.0028037	0.134589	0.000657459	0.137867	0.000741983	0.0956653	-0.0009762	0.148372	0.000891645	0.126537	0.00279517	0.118453	-0.00780909	0.0960252	0.000379795	0.0960519	-0.000685133	0.0963326	0.000257961	0.131492	0.00241198	0.124335	0.000867575	0.0990887	-0.00228441	0.116182	0.000568765	0.0952772	0.000835842	0.142836	-0.0021965	0.133687	-0.000897934	0.102888	0.00138699	0.111441
2018-06-19T11:09:00	0.121314	-0.00303676	0.120326	-0.000329952	0.15039	-0.0128011	0.131875	-0.000438895	0.0900633	-0.00213962	0.103218	0.000233569	0.142912	0.00285323	0.125881	0.00061492	0.137781	0.000741523	0.0957183	-0.000976741	0.148485	0.000892321	0.127671	0.00282022	0.120878	-0.00796896	0.0985523	0.00038979	0.0976242	-0.000696348	0.0963277	0.000257948	0.13143	0.00241083	0.124307	0.000867383	0.0977013	-0.00225243	0.118512	0.000580174	0.0952339	0.000835463	0.143393	-0.00220508	0.135158	-0.000907812	0.103267	0.00139209	0.113226
2018-06-19T11:12:00	0.122113	-0.00305677	0.121518	-0.000333222	0.151786	-0.01292	0.131242	-0.000436788	0.0802007	-0.00190531	0.106419	0.000240812	0.145949	0.00291387	0.119521	0.000583852	0.137879	0.000742048	0.09503	-0.000969717	0.149133	0.000896216	0.128918	0.00284777	0.122099	-0.00804947	0.102781	0.000406516	0.0989477	-0.000705788	0.095911	0.000256832	0.131947	0.00242032	0.123438	0.000861317	0.0970236	-0.0022368	0.119514	0.000585078	0.0949457	0.000832934	0.14408	-0.00221563	0.136487	-0.00091674	0.101864	0.00137318	0.114501
2018-06-19T11:15:00	0.123336	-0.00308738	0.121493	-0.000333153	0.154322	-0.0131358	0.130266	-0.000433541	0.0773094	-0.00183663	0.106527	0.000241057	0.148403	0.00296285	0.112829	0.000551162	0.138589	0.00074587	0.0948527	-0.000967908	0.150469	0.000904248	0.130061	0.00287302	0.123088	-0.00811462	0.105765	0.000418318	0.100012	-0.000713379	0.0954419	0.000255576	0.13437	0.00246477	0.122985	0.000858159	0.0968737	-0.00223335	0.120106	0.000587975	0.096089	0.000842964	0.144729	-0.00222562	0.138702	-0.000931615	0.100883	0.00135996	0.117148
2018-06-19T11:18:00	0.124939	-0.00312751	0.12265	-0.000336326	0.155371	-0.0132251	0.130164	-0.000433201	0.0702187	-0.00166817	0.107783	0.000243899	0.151443	0.00302356	0.101774	0.00049716	0.138171	0.000743621	0.0952061	-0.000971514	0.151147	0.000908318	0.130042	0.00287259	0.124026	-0.0081765	0.109006	0.000431136	0.10131	-0.000722635	0.0955015	0.000255735	0.136027	0.00249516	0.12168	0.000849048	0.0987465	-0.00227652	0.122087	0.000597676	0.0965484	0.000846994	0.144905	-0.00222832	0.140498	-0.000943676	0.101713	0.00137115	0.119184
2018-06-19T11:21:00	0.126518	-0.00316704	0.124411	-0.000341154	0.154609	-0.0131602	0.130592	-0.000434624	0.0668811	-0.00158888	0.106832	0.000241747	0.15328	0.00306023	0.0916684	0.000447794	0.138425	0.000744986	0.0953494	-0.000972976	0.150819	0.000906346	0.131076	0.00289542	0.124035	-0.0081771	0.110546	0.000437228	0.103268	-0.000736605	0.0946604	0.000253483	0.137609	0.00252418	0.120804	0.000842938	0.0980381	-0.00226019	0.12271	0.000600723	0.098272	0.000862115	0.144865	-0.00222771	0.141344	-0.000949358	0.102852	0.0013865	0.120197
2018-06-19T11:24:00	0.127909	-0.00320185	0.126098	-0.000345781	0.157218	-0.0133823	0.131501	-0.000437649	0.0643225	-0.0015281	0.108192	0.000244824	0.155646	0.00310747	0.0756286	0.000369441	0.138722	0.000746586	0.0958149	-0.000977726	0.149818	0.000900331	0.131637	0.00290782	0.124744	-0.00822381	0.114032	0.000451014	0.104344	-0.000744282	0.0937666	0.00025109	0.138124	0.00253362	0.121717	0.000849306	0.0972077	-0.00224105	0.124437	0.00060918	0.0997136	0.000874762	0.145663	-0.00223998	0.142214	-0.000955207	0.104855	0.00141349	0.123021
2018-06-19T11:27:00	0.129177	-0.00323359	0.127682	-0.000350124	0.158155	-0.0134621	0.132054	-0.00043949	0.0623381	-0.00148096	0.108453	0.000245415	0.156006	0.00311464	0.0629042	0.000307283	0.138801	0.000747011	0.0964126	-0.000983825	0.148067	0.000889811	0.132736	0.00293211	0.125334	-0.00826269	0.116059	0.000459032	0.103957	-0.000741522	0.094117	0.000252028	0.138641	0.0025431	0.123454	0.000861431	0.0967146	-0.00222968	0.125352	0.000613658	0.101357	0.000889179	0.145819	-0.00224238	0.14292	-0.000959945	0.106184	0.00143142	0.124879
2018-06-19T11:30:00	0.131397	-0.00328917	0.129289	-0.00035453	0.160942	-0.0136993	0.13305	-0.000442806	0.0637853	-0.00151534	0.109503	0.000247791	0.15688	0.00313211	0.0576953	0.000281838	0.139208	0.0007492	0.0966753	-0.000986506	0.145406	0.00087382	0.133793	0.00295546	0.125601	-0.00828033	0.118855	0.00047009	0.103243	-0.000736428	0.0949827	0.000254346	0.139641	0.00256145	0.124684	0.000870009	0.0972509	-0.00224204	0.126029	0.000616972	0.102625	0.000900302	0.146575	-0.00225401	0.143791	-0.0009658	0.107947	0.00145519	0.125796
2018-06-19T11:33:00	0.132631	-0.00332005	0.130614	-0.000358165	0.164038	-0.0139629	0.133002	-0.000442644	0.0616876	-0.0014655	0.110679	0.000250452	0.157458	0.00314363	0.0452334	0.000220962	0.13967	0.000751688	0.0972744	-0.00099262	0.143148	0.000860251	0.134079	0.00296176	0.125329	-0.00826236	0.12157	0.000480831	0.103529	-0.000738469	0.0963906	0.000258116	0.138845	0.00254685	0.125909	0.000878563	0.0963874	-0.00222214	0.127337	0.000623377	0.103591	0.00090878	0.146077	-0.00224634	0.143632	-0.000964726	0.109594	0.00147738	0.127216
2018-06-19T11:36:00	0.133948	-0.00335301	0.132689	-0.000363856	0.166219	-0.0141485	0.133764	-0.000445179	0.0655059	-0.00155621	0.111655	0.000252661	0.158145	0.00315736	0.0419765	0.000205052	0.139429	0.000750392	0.0980804	-0.00100084	0.141639	0.000851179	0.135087	0.00298403	0.124827	-0.00822929	0.124147	0.00049102	0.103614	-0.000739074	0.0984702	0.000263685	0.137871	0.00252898	0.125831	0.000878014	0.0952796	-0.0021966	0.128463	0.000628886	0.104885	0.000920132	0.146219	-0.00224853	0.144344	-0.000969513	0.110789	0.00149349	0.128623
2018-06-19T11:39:00	0.134922	-0.00337741	0.135454	-0.000371438	0.16832	-0.0143274	0.134395	-0.000447283	0.0698925	-0.00166042	0.112382	0.000254306	0.159513	0.00318468	0.0366138	0.000178856	0.139914	0.000753003	0.0982615	-0.00100269	0.139954	0.000841058	0.135964	0.0030034	0.123782	-0.0081604	0.127059	0.000502537	0.103011	-0.000734775	0.099737	0.000267077	0.136101	0.00249652	0.126146	0.000880214	0.0945116	-0.00217889	0.130158	0.000637186	0.105751	0.000927726	0.146251	-0.00224902	0.144442	-0.00097017	0.111255	0.00149977	0.129882
2018-06-19T11:42:00	0.136361	-0.00341343	0.137262	-0.000376395	0.169037	-0.0143884	0.135607	-0.000451316	0.0729147	-0.00173222	0.111132	0.000251477	0.160879	0.00321194	0.0321893	0.000157243	0.139822	0.000752507	0.0990031	-0.00101026	0.138113	0.000829989	0.136398	0.00301299	0.123058	-0.00811269	0.129041	0.000510377	0.10252	-0.000731268	0.101322	0.000271323	0.135496	0.00248543	0.125494	0.000875665	0.0941532	-0.00217063	0.131195	0.00064226	0.106778	0.000936733	0.146991	-0.00226041	0.143145	-0.000961459	0.111495	0.00150301	0.130235
2018-06-19T11:45:00	0.137666	-0.00344609	0.137956	-0.000378298	0.167353	-0.014245	0.136937	-0.000455741	0.0795617	-0.00189013	0.111321	0.000251905	0.161952	0.00323337	0.0339258	0.000165726	0.139701	0.000751855	0.0992386	-0.00101266	0.135845	0.000816363	0.1359	0.00300199	0.122191	-0.00805553	0.130159	0.000514801	0.100694	-0.000718244	0.102765	0.000275186	0.13497	0.00247576	0.125528	0.0008759	0.0923558	-0.00212919	0.132716	0.000649708	0.107469	0.0009428	0.14831	-0.00228068	0.143055	-0.000960852	0.112534	0.00151701	0.130564
2018-06-19T11:48:00	0.138336	-0.00346286	0.139782	-0.000383306	0.168387	-0.0143331	0.13812	-0.000459677	0.0827446	-0.00196575	0.111213	0.000251661	0.16198	0.00323393	0.032508	0.0001588	0.14015	0.000754271	0.0992373	-0.00101265	0.132968	0.000799076	0.136484	0.0030149	0.122056	-0.00804664	0.13185	0.000521486	0.0990144	-0.000706264	0.104128	0.000278836	0.134607	0.0024691	0.12524	0.000873892	0.0911325	-0.00210099	0.134184	0.000656895	0.108962	0.000955898	0.148777	-0.00228786	0.143348	-0.00096282	0.114038	0.00153729	0.131395
2018-06-19T11:51:00	0.139764	-0.0034986	0.141729	-0.000388645	0.169458	-0.0144242	0.138318	-0.000460338	0.0899394	-0.00213668	0.112049	0.000253552	0.162261	0.00323954	0.0342475	0.000167297	0.141674	0.000762472	0.100219	-0.00102267	0.129453	0.00077795	0.136663	0.00301885	0.121688	-0.00802233	0.134168	0.000530654	0.097788	-0.000697516	0.105884	0.000283538	0.133823	0.00245473	0.125974	0.000879011	0.0892194	-0.00205688	0.135216	0.000661944	0.110129	0.000966132	0.149369	-0.00229697	0.142729	-0.000958664	0.115494	0.00155692	0.132441
2018-06-19T11:54:00	0.141488	-0.00354177	0.143952	-0.000394741	0.171068	-0.0145613	0.139461	-0.000464143	0.0980722	-0.00232989	0.112918	0.000255519	0.161969	0.00323371	0.0394793	0.000192854	0.142298	0.000765833	0.101539	-0.00103614	0.126375	0.000759449	0.137605	0.00303966	0.12155	-0.00801327	0.134719	0.000532837	0.0967936	-0.000690423	0.10775	0.000288534	0.131408	0.00241044	0.126988	0.000886086	0.0902727	-0.00208117	0.137731	0.00067426	0.11106	0.0009743	0.150844	-0.00231965	0.143244	-0.000962123	0.116932	0.00157631	0.133417
2018-06-19T11:57:00	0.143123	-0.00358268	0.145533	-0.000399075	0.171907	-0.0146327	0.140594	-0.000467912	0.101107	-0.00240197	0.113967	0.000257892	0.162236	0.00323904	0.0419397	0.000204872	0.143319	0.000771328	0.101801	-0.00103881	0.12368	0.000743257	0.1386	0.00306163	0.122737	-0.00809148	0.135852	0.000537315	0.0956885	-0.00068254	0.109725	0.000293823	0.129647	0.00237813	0.126361	0.000881716	0.0889403	-0.00205045	0.138992	0.00068043	0.111464	0.000977849	0.152288	-0.00234185	0.143428	-0.000963359	0.118084	0.00159183	0.13336
2018-06-19T12:00:00	0.144625	-0.00362028	0.147074	-0.000403301	0.173286	-0.01475	0.14069	-0.00046823	0.108188	-0.0025702	0.113281	0.00025634	0.16076	0.00320956	0.0525267	0.000256589	0.144418	0.000777241	0.103385	-0.00105497	0.122378	0.000735432	0.138949	0.00306934	0.121139	-0.00798617	0.13677	0.000540948	0.0952532	-0.000679436	0.111135	0.0002976	0.129216	0.00237022	0.125129	0.000873115	0.0887199	-0.00204537	0.139593	0.000683376	0.112573	0.000987576	0.152973	-0.00235239	0.1433	-0.000962502	0.11935	0.0016089	0.133791
2018-06-19T12:03:00	0.146212	-0.00366003	0.148889	-0.000408278	0.173776	-0.0147917	0.142394	-0.000473902	0.115789	-0.00275077	0.112564	0.000254718	0.160611	0.0032066	0.0578322	0.000282506	0.14579	0.000784624	0.10477	-0.00106911	0.121602	0.000730771	0.139277	0.00307659	0.120346	-0.00793384	0.136506	0.000539903	0.0947844	-0.000676092	0.112711	0.000301819	0.128012	0.00234813	0.12483	0.000871031	0.0888686	-0.00204879	0.141467	0.000692546	0.113634	0.000996882	0.154186	-0.00237104	0.143658	-0.000964904	0.118333	0.00159519	0.132865
2018-06-19T12:06:00	0.146909	-0.00367747	0.150697	-0.000413235	0.173499	-0.0147682	0.144023	-0.000479323	0.117649	-0.00279497	0.112429	0.000254412	0.158163	0.00315772	0.0658589	0.000321717	0.146659	0.0007893	0.105188	-0.00107337	0.120955	0.000726878	0.13931	0.00307731	0.11946	-0.00787546	0.136121	0.000538381	0.094538	-0.000674334	0.113926	0.000305072	0.127794	0.00234415	0.123785	0.000863741	0.0898568	-0.00207158	0.142774	0.000698947	0.113606	0.00099664	0.154349	-0.00237354	0.143092	-0.000961101	0.118182	0.00159315	0.132716
2018-06-19T12:09:00	0.147063	-0.00368133	0.151615	-0.000415752	0.173213	-0.0147438	0.144915	-0.000482294	0.123288	-0.00292892	0.112286	0.000254088	0.156582	0.00312616	0.0761289	0.000371884	0.147208	0.000792256	0.105192	-0.00107341	0.120061	0.000721506	0.140283	0.00309882	0.118991	-0.00784456	0.136913	0.000541512	0.0945149	-0.000674169	0.115393	0.000309001	0.12787	0.00234553	0.124217	0.000866754	0.0924613	-0.00213162	0.144174	0.000705801	0.113237	0.000993399	0.154513	-0.00237607	0.14286	-0.000959543	0.119076	0.0016052	0.133066
2018-06-19T12:12:00	0.146988	-0.00367945	0.153008	-0.000419573	0.173715	-0.0147866	0.146705	-0.00048825	0.131323	-0.00311982	0.11274	0.000255116	0.154971	0.00309399	0.0897905	0.000438621	0.148258	0.000797908	0.106404	-0.00108578	0.119224	0.000716479	0.141679	0.00312966	0.118997	-0.00784493	0.135968	0.000537776	0.0939524	-0.000670157	0.117152	0.000313713	0.12861	0.0023591	0.123893	0.000864494	0.0936674	-0.00215943	0.145644	0.000712994	0.112959	0.000990957	0.154733	-0.00237946	0.142635	-0.000958032	0.120472	0.00162403	0.132728
2018-06-19T12:15:00	0.146746	-0.00367338	0.152884	-0.000419233	0.172286	-0.0146649	0.147417	-0.00049062	0.133981	-0.00318296	0.113643	0.000257159	0.15267	0.00304805	0.100428	0.000490585	0.148648	0.000800005	0.10746	-0.00109656	0.11867	0.00071315	0.141444	0.00312446	0.118537	-0.00781464	0.13524	0.000534898	0.0940961	-0.000671182	0.118891	0.000318368	0.129671	0.00237856	0.12232	0.000853516	0.0961185	-0.00221594	0.146007	0.000714774	0.113019	0.00099149	0.155401	-0.00238973	0.142743	-0.000958755	0.120976	0.00163082	0.133389
2018-06-19T12:18:00	0.147621	-0.00369529	0.15285	-0.000419139	0.171902	-0.0146323	0.148643	-0.0004947	0.140875	-0.00334673	0.113063	0.000255848	0.150461	0.00300396	0.113947	0.000556621	0.149602	0.000805144	0.108527	-0.00110745	0.119534	0.000718343	0.141335	0.00312204	0.119331	-0.00786696	0.135235	0.000534876	0.0951133	-0.000678437	0.119294	0.000319447	0.131075	0.00240433	0.121196	0.000845675	0.0959914	-0.00221301	0.146403	0.000716711	0.11254	0.000987287	0.155711	-0.0023945	0.14299	-0.000960414	0.121759	0.00164137	0.133924
2018-06-19T12:21:00	0.147996	-0.00370466	0.153243	-0.000420218	0.171838	-0.0146268	0.151388	-0.000503836	0.147449	-0.00350293	0.113907	0.000257758	0.148375	0.0029623	0.127689	0.00062375	0.150911	0.000812186	0.109944	-0.00112191	0.120272	0.000722779	0.141008	0.00311483	0.120229	-0.00792618	0.132531	0.000524183	0.0963466	-0.000687234	0.119951	0.000321206	0.132267	0.00242619	0.120247	0.000839052	0.0956823	-0.00220588	0.147324	0.000721218	0.113144	0.000992582	0.155498	-0.00239122	0.143402	-0.000963185	0.123157	0.00166022	0.134572
2018-06-19T12:24:00	0.147762	-0.00369882	0.154215	-0.000422884	0.171776	-0.0146215	0.153504	-0.000510877	0.15007	-0.00356518	0.114186	0.000258389	0.147523	0.0029453	0.134493	0.000656989	0.151476	0.000815229	0.110768	-0.00113031	0.120675	0.000725199	0.140893	0.00311228	0.121475	-0.0080083	0.131338	0.000519462	0.0976147	-0.00069628	0.120711	0.000323241	0.131086	0.00240453	0.119646	0.000834855	0.0983772	-0.00226801	0.148403	0.000726504	0.113162	0.000992741	0.155957	-0.00239827	0.143032	-0.000960701	0.123974	0.00167124	0.134197
2018-06-19T12:27:00	0.147373	-0.00368907	0.154146	-0.000422693	0.170849	-0.0145426	0.153261	-0.000510068	0.151568	-0.00360077	0.114192	0.000258403	0.146788	0.00293062	0.144764	0.000707161	0.151472	0.000815208	0.111172	-0.00113444	0.121066	0.00072755	0.14074	0.00310892	0.122126	-0.0080512	0.128711	0.000509071	0.0979948	-0.000698991	0.121658	0.000325779	0.12978	0.00238057	0.119201	0.000831752	0.0975735	-0.00224948	0.147808	0.000723592	0.113603	0.000996611	0.155058	-0.00238446	0.142428	-0.000956641	0.124557	0.0016791	0.134004
2018-06-19T12:30:00	0.146768	-0.00367395	0.15325	-0.000420237	0.167717	-0.014276	0.155014	-0.000515902	0.153688	-0.00365113	0.116089	0.000262696	0.145901	0.00291291	0.151558	0.000740352	0.152838	0.00082256	0.111617	-0.00113898	0.120076	0.000721596	0.14105	0.00311575	0.122013	-0.00804375	0.125894	0.00049793	0.0982045	-0.000700487	0.122513	0.000328066	0.129136	0.00236875	0.118541	0.000827144	0.0972441	-0.00224188	0.147921	0.000724144	0.113455	0.000995312	0.154466	-0.00237536	0.141755	-0.000952122	0.124668	0.00168058	0.134239
2018-06-19T12:33:00	0.145023	-0.00363024	0.153632	-0.000421284	0.166674	-0.0141872	0.156582	-0.000521121	0.157119	-0.00373265	0.116266	0.000263094	0.144439	0.00288371	0.159086	0.000777124	0.153117	0.000824056	0.112272	-0.00114566	0.118134	0.00070993	0.141142	0.00311779	0.12093	-0.00797234	0.123911	0.000490089	0.0994078	-0.00070907	0.123386	0.000330405	0.1291	0.00236809	0.118359	0.000825881	0.0981622	-0.00226305	0.147795	0.000723524	0.11342	0.000995004	0.15419	-0.0023711	0.141221	-0.000948535	0.124097	0.00167289	0.134896
2018-06-19T12:36:00	0.142989	-0.00357934	0.153487	-0.000420886	0.164764	-0.0140247	0.15674	-0.000521648	0.158188	-0.00375804	0.115261	0.000260822	0.143412	0.00286322	0.162454	0.000793577	0.154861	0.000833444	0.112776	-0.0011508	0.118721	0.000713458	0.141795	0.00313222	0.119966	-0.00790884	0.122329	0.000483832	0.100064	-0.000713751	0.123458	0.000330598	0.128881	0.00236407	0.118573	0.000827372	0.0989879	-0.00228209	0.146776	0.00071854	0.114565	0.00100505	0.152406	-0.00234367	0.139846	-0.000939302	0.124844	0.00168296	0.134533
2018-06-19T12:39:00	0.141035	-0.00353041	0.153287	-0.000420337	0.163046	-0.0138785	0.156969	-0.000522409	0.159495	-0.0037891	0.115752	0.000261932	0.141401	0.00282307	0.165556	0.000808728	0.155636	0.000837618	0.114027	-0.00116356	0.11772	0.000707442	0.141793	0.00313216	0.120582	-0.00794944	0.120987	0.000478524	0.10121	-0.000721928	0.124344	0.00033297	0.129177	0.00236951	0.117509	0.000819946	0.100591	-0.00231905	0.145575	0.000712659	0.115846	0.00101629	0.151436	-0.00232875	0.139919	-0.000939793	0.125095	0.00168634	0.134224
2018-06-19T12:42:00	0.140079	-0.0035065	0.153669	-0.000421386	0.160411	-0.0136541	0.156981	-0.000522449	0.16178	-0.00384337	0.117537	0.000265971	0.141515	0.00282534	0.169784	0.000829382	0.155991	0.000839527	0.114897	-0.00117245	0.116918	0.000702622	0.141445	0.00312449	0.12074	-0.00795983	0.119056	0.000470887	0.102625	-0.000732022	0.123293	0.000330155	0.127821	0.00234464	0.117024	0.000816561	0.103606	-0.00238856	0.143961	0.000704758	0.115838	0.00101622	0.150504	-0.00231443	0.139329	-0.000935828	0.125831	0.00169627	0.134074
2018-06-19T12:45:00	0.139261	-0.00348601	0.153765	-0.000421648	0.158207	-0.0134665	0.157036	-0.000522633	0.162654	-0.00386414	0.117049	0.000264866	0.141714	0.0028293	0.1769	0.000864145	0.156428	0.000841876	0.115399	-0.00117757	0.116712	0.000701383	0.141395	0.00312337	0.1204	-0.00793742	0.118699	0.000469472	0.104532	-0.000745618	0.12329	0.000330148	0.127154	0.0023324	0.116005	0.000809453	0.105233	-0.00242606	0.143246	0.000701259	0.114896	0.00100795	0.150155	-0.00230905	0.13856	-0.000930661	0.126762	0.00170881	0.133109
2018-06-19T12:48:00	0.138164	-0.00345857	0.153229	-0.000420179	0.155939	-0.0132734	0.15742	-0.000523912	0.162362	-0.0038572	0.118072	0.000267183	0.141541	0.00282586	0.182886	0.000893388	0.156762	0.000843676	0.115795	-0.00118161	0.115328	0.000693066	0.141013	0.00311494	0.120249	-0.00792751	0.117391	0.000464299	0.106215	-0.000757627	0.121561	0.000325518	0.125036	0.00229354	0.115126	0.000803321	0.108172	-0.00249382	0.142579	0.000697994	0.114154	0.00100144	0.150446	-0.00231353	0.136654	-0.000917863	0.12673	0.00170838	0.132485
2018-06-19T12:51:00	0.137464	-0.00344104	0.152081	-0.000417031	0.155224	-0.0132126	0.157854	-0.000525357	0.161806	-0.003844	0.11684	0.000264394	0.140945	0.00281396	0.188377	0.000920209	0.157328	0.00084672	0.116616	-0.00118999	0.113986	0.000685003	0.14005	0.00309368	0.120197	-0.00792406	0.117785	0.000465861	0.107729	-0.000768422	0.120314	0.000322179	0.12291	0.00225455	0.11472	0.000800488	0.107476	-0.00247777	0.141837	0.00069436	0.113731	0.000997737	0.150308	-0.00231141	0.13626	-0.000915215	0.127001	0.00171204	0.131483
2018-06-19T12:54:00	0.136268	-0.00341109	0.150947	-0.00041392	0.153878	-0.013098	0.157202	-0.000523186	0.162087	-0.00385068	0.116398	0.000263394	0.140358	0.00280225	0.196163	0.000958241	0.15812	0.000850986	0.117603	-0.00120005	0.112888	0.000678401	0.1393	0.00307709	0.120604	-0.0079509	0.117903	0.000466326	0.1083	-0.000772499	0.119347	0.00031959	0.121572	0.00223001	0.114596	0.000799621	0.109051	-0.00251409	0.140536	0.000687991	0.113251	0.000993524	0.150123	-0.00230856	0.135297	-0.000908747	0.127729	0.00172186	0.131536
2018-06-19T12:57:00	0.135607	-0.00339456	0.149804	-0.000410787	0.154017	-0.0131098	0.157648	-0.00052467	0.159419	-0.00378728	0.117466	0.000265811	0.1401	0.00279709	0.201045	0.000982092	0.15888	0.000855076	0.118835	-0.00121263	0.111562	0.000670431	0.139505	0.00308163	0.12028	-0.00792951	0.118389	0.00046825	0.108888	-0.000776691	0.118151	0.000316387	0.119446	0.00219102	0.114505	0.000798986	0.107297	-0.00247366	0.139805	0.000684412	0.111367	0.000976998	0.149243	-0.00229503	0.134972	-0.000906559	0.126691	0.00170786	0.131862
2018-06-19T13:00:00	0.135255	-0.00338574	0.149915	-0.000411091	0.153587	-0.0130733	0.157957	-0.000525697	0.155878	-0.00370317	0.118257	0.0002676	0.140072	0.00279652	0.203206	0.00099265	0.159372	0.000857721	0.120465	-0.00122926	0.111378	0.000669329	0.138851	0.00306718	0.120392	-0.00793689	0.118283	0.000467827	0.111052	-0.000792128	0.116773	0.000312697	0.118853	0.00218012	0.113956	0.000795153	0.104394	-0.00240672	0.139496	0.000682899	0.110876	0.000972685	0.149213	-0.00229457	0.135198	-0.000908078	0.125851	0.00169654	0.131181
2018-06-19T13:03:00	0.135356	-0.00338826	0.150588	-0.000412936	0.154013	-0.0131095	0.15691	-0.000522212	0.150454	-0.00357431	0.117913	0.000266822	0.140246	0.00280001	0.201566	0.000984635	0.159633	0.000859127	0.12258	-0.00125085	0.112121	0.000673793	0.13853	0.00306009	0.120206	-0.00792461	0.117493	0.000464703	0.112363	-0.000801477	0.115939	0.000310464	0.118869	0.00218042	0.113555	0.000792358	0.101886	-0.00234891	0.139228	0.000681589	0.110249	0.000967186	0.149418	-0.00229773	0.1343	-0.000902047	0.124789	0.00168222	0.13173
2018-06-19T13:06:00	0.136547	-0.00341808	0.14997	-0.000411241	0.154429	-0.0131449	0.156586	-0.000521136	0.145322	-0.00345238	0.119423	0.00027024	0.140539	0.00280585	0.202126	0.000987371	0.158605	0.000853597	0.123423	-0.00125945	0.11192	0.000672583	0.139548	0.00308259	0.12019	-0.00792359	0.116114	0.000459252	0.113712	-0.000811102	0.114002	0.000305276	0.118408	0.00217197	0.112264	0.000783351	0.101288	-0.00233511	0.139138	0.000681145	0.110556	0.000969879	0.150359	-0.00231219	0.133571	-0.000897153	0.124576	0.00167934	0.13062
2018-06-19T13:09:00	0.137122	-0.00343247	0.150066	-0.000411507	0.154874	-0.0131828	0.155016	-0.000515911	0.140153	-0.00332958	0.119469	0.000270344	0.139348	0.00278208	0.20269	0.000990128	0.158548	0.000853288	0.123358	-0.00125878	0.111762	0.000671636	0.139375	0.00307876	0.11988	-0.00790316	0.116108	0.000459227	0.114255	-0.000814976	0.111484	0.000298534	0.117942	0.00216341	0.111606	0.000778755	0.0984569	-0.00226984	0.138737	0.000679183	0.109088	0.000957001	0.151005	-0.00232212	0.133196	-0.000894633	0.124199	0.00167427	0.130501
2018-06-19T13:12:00	0.137303	-0.003437	0.14918	-0.000409075	0.154871	-0.0131825	0.154241	-0.00051333	0.133735	-0.00317713	0.119193	0.000269719	0.138588	0.00276689	0.200367	0.000978778	0.158824	0.000854773	0.124659	-0.00127206	0.11113	0.000667837	0.139294	0.00307697	0.120469	-0.00794198	0.116885	0.000462299	0.114898	-0.000819558	0.109245	0.000292537	0.117254	0.00215079	0.111627	0.000778905	0.0947452	-0.00218428	0.138946	0.000680206	0.109119	0.000957276	0.152357	-0.00234293	0.133149	-0.000894319	0.123046	0.00165872	0.130353
2018-06-19T13:15:00	0.13711	-0.00343218	0.148534	-0.000407304	0.153235	-0.0130433	0.154165	-0.000513077	0.129315	-0.00307211	0.119558	0.000270546	0.137762	0.00275041	0.196896	0.000961823	0.159706	0.000859521	0.124432	-0.00126975	0.110907	0.000666498	0.139677	0.00308543	0.120001	-0.00791116	0.117087	0.000463099	0.116044	-0.000827734	0.108492	0.000290522	0.119972	0.00220066	0.110961	0.000774253	0.0926996	-0.00213712	0.138923	0.000680092	0.108644	0.000953108	0.15319	-0.00235573	0.133406	-0.000896042	0.123097	0.00165941	0.129299
2018-06-19T13:18:00	0.137139	-0.0034329	0.147524	-0.000404534	0.154618	-0.013161	0.154314	-0.000513575	0.124107	-0.00294838	0.119646	0.000270745	0.137327	0.00274172	0.191858	0.000937213	0.159151	0.000856531	0.125128	-0.00127685	0.110655	0.000664981	0.139744	0.0030869	0.119932	-0.00790661	0.117491	0.000464697	0.11802	-0.000841832	0.106755	0.00028587	0.120299	0.00220665	0.110042	0.000767845	0.0906173	-0.00208911	0.138747	0.00067923	0.108058	0.000947963	0.153242	-0.00235652	0.134395	-0.000902689	0.123763	0.00166839	0.13018
2018-06-19T13:21:00	0.137822	-0.00345	0.146206	-0.000400919	0.154725	-0.0131701	0.154578	-0.000514452	0.120734	-0.00286825	0.120108	0.000271789	0.13698	0.0027348	0.186769	0.000912353	0.159211	0.000856853	0.126886	-0.00129479	0.111183	0.000668156	0.139331	0.00307778	0.119077	-0.00785019	0.117927	0.000466419	0.118897	-0.000848082	0.10461	0.000280125	0.120122	0.00220342	0.109644	0.000765065	0.0883764	-0.00203745	0.138568	0.000678354	0.10861	0.000952811	0.154065	-0.00236919	0.134636	-0.000904307	0.122671	0.00165366	0.130875
2018-06-19T13:24:00	0.138256	-0.00346086	0.145116	-0.000397932	0.154419	-0.013144	0.154388	-0.000513821	0.119165	-0.00283097	0.119819	0.000271136	0.138245	0.00276006	0.182746	0.000892701	0.158348	0.000852211	0.127686	-0.00130295	0.112164	0.00067405	0.139367	0.00307859	0.118415	-0.00780658	0.118291	0.00046786	0.119448	-0.000852013	0.102921	0.000275604	0.121885	0.00223575	0.108684	0.000758368	0.0873198	-0.00201309	0.139371	0.000682287	0.108891	0.000955277	0.154513	-0.00237607	0.134019	-0.00090016	0.122936	0.00165724	0.130417
2018-06-19T13:27:00	0.138868	-0.00347617	0.145351	-0.000398577	0.154735	-0.013171	0.154727	-0.000514948	0.117919	-0.00280138	0.119648	0.000270748	0.138615	0.00276743	0.176469	0.000862039	0.15832	0.000852059	0.127908	-0.00130521	0.112405	0.000675499	0.139469	0.00308084	0.117599	-0.00775277	0.117109	0.000463183	0.1207	-0.000860944	0.100744	0.000269774	0.122692	0.00225054	0.108893	0.000759829	0.0885883	-0.00204233	0.140698	0.000688782	0.109075	0.000956887	0.154515	-0.00237611	0.134007	-0.000900079	0.12294	0.00165729	0.12989
2018-06-19T13:30:00	0.13938	-0.00348901	0.144323	-0.000395757	0.154776	-0.0131744	0.155099	-0.000516185	0.115286	-0.00273883	0.119852	0.000271211	0.138317	0.00276149	0.170347	0.000832132	0.158327	0.000852098	0.128262	-0.00130883	0.112954	0.000678801	0.140237	0.0030978	0.117138	-0.00772238	0.115726	0.000457716	0.121337	-0.000865487	0.0989168	0.000264881	0.123102	0.00225808	0.10848	0.000756941	0.0850347	-0.00196041	0.141267	0.000691567	0.108653	0.000953183	0.154762	-0.0023799	0.134006	-0.000900071	0.122283	0.00164844	0.129501
2018-06-19T13:33:00	0.13877	-0.00347373	0.143378	-0.000393167	0.155042	-0.0131971	0.156282	-0.000520125	0.113744	-0.0027022	0.121595	0.000275154	0.137118	0.00273755	0.162997	0.000796227	0.157886	0.000849727	0.127713	-0.00130322	0.113683	0.000683181	0.140245	0.00309798	0.116713	-0.00769438	0.115817	0.000458077	0.120812	-0.000861743	0.0974898	0.00026106	0.124302	0.00228009	0.108281	0.000755557	0.0853497	-0.00196767	0.141052	0.000690517	0.1089	0.000955353	0.155424	-0.00239009	0.13504	-0.000907016	0.123415	0.00166369	0.129837
2018-06-19T13:36:00	0.137757	-0.00344837	0.141671	-0.000388484	0.154116	-0.0131183	0.156787	-0.000521804	0.113566	-0.00269796	0.122821	0.000277928	0.136193	0.00271909	0.157805	0.000770867	0.157884	0.000849713	0.128138	-0.00130756	0.113752	0.000683596	0.140261	0.00309833	0.11658	-0.00768557	0.114368	0.000452342	0.120598	-0.000860219	0.0965098	0.000258436	0.125347	0.00229926	0.108809	0.000759239	0.0843107	-0.00194372	0.141142	0.000690954	0.108788	0.000954371	0.156255	-0.00240286	0.135892	-0.000912739	0.124545	0.00167893	0.13054
2018-06-19T13:39:00	0.137286	-0.00343658	0.140772	-0.000386021	0.150829	-0.0128385	0.157323	-0.000523587	0.113057	-0.00268588	0.123777	0.000280092	0.13695	0.00273419	0.153002	0.000747405	0.15836	0.000852278	0.128956	-0.00131591	0.113787	0.000683804	0.139404	0.00307941	0.116476	-0.00767876	0.113783	0.000450029	0.11986	-0.000854955	0.0962119	0.000257638	0.124967	0.00229228	0.108563	0.000757527	0.0859395	-0.00198127	0.141216	0.000691321	0.109029	0.000956486	0.156511	-0.0024068	0.135637	-0.000911032	0.125849	0.00169651	0.131803
2018-06-19T13:42:00	0.135375	-0.00338875	0.13993	-0.00038371	0.150097	-0.0127762	0.157841	-0.000525311	0.112948	-0.00268329	0.124528	0.000281791	0.136782	0.00273085	0.1469	0.000717599	0.158167	0.000851239	0.129251	-0.00131892	0.114631	0.000688874	0.138323	0.00305552	0.116657	-0.00769067	0.113115	0.000447388	0.119479	-0.000852238	0.0944716	0.000252978	0.123101	0.00225805	0.10772	0.000751639	0.0860128	-0.00198296	0.140577	0.000688192	0.10881	0.000954563	0.1565	-0.00240663	0.135991	-0.000913407	0.125932	0.00169763	0.131603
2018-06-19T13:45:00	0.134314	-0.00336219	0.138755	-0.000380488	0.149584	-0.0127325	0.158734	-0.000528283	0.113144	-0.00268795	0.125767	0.000284595	0.137158	0.00273834	0.139763	0.000682734	0.157575	0.000848052	0.128886	-0.00131519	0.115298	0.000692884	0.138124	0.00305112	0.116376	-0.00767216	0.111446	0.000440786	0.118594	-0.000845922	0.0937909	0.000251155	0.122053	0.00223883	0.106653	0.000744199	0.0866691	-0.00199809	0.138449	0.000677774	0.108979	0.000956043	0.155902	-0.00239744	0.135669	-0.000911247	0.126309	0.00170272	0.132087
2018-06-19T13:48:00	0.133164	-0.0033334	0.13784	-0.00037798	0.149399	-0.0127168	0.158699	-0.000528168	0.114521	-0.00272065	0.124777	0.000282355	0.136822	0.00273165	0.139077	0.000679383	0.157815	0.000849345	0.12851	-0.00131136	0.114557	0.000688433	0.137165	0.00302993	0.115476	-0.00761284	0.109204	0.00043192	0.11759	-0.000838759	0.0926314	0.00024805	0.121484	0.0022284	0.106982	0.000746494	0.086775	-0.00200053	0.136745	0.000669433	0.108724	0.00095381	0.156124	-0.00240085	0.135314	-0.000908861	0.125832	0.00169628	0.131543
2018-06-19T13:51:00	0.132037	-0.0033052	0.136926	-0.000375473	0.14733	-0.0125406	0.157373	-0.000523754	0.114736	-0.00272576	0.124215	0.000281082	0.134866	0.00269259	0.140668	0.000687152	0.156896	0.000844398	0.128342	-0.00130964	0.113755	0.00068361	0.137124	0.00302904	0.114749	-0.0075649	0.106883	0.000422738	0.117188	-0.000835895	0.0909123	0.000243446	0.120479	0.00220997	0.107107	0.000747363	0.0873733	-0.00201432	0.135685	0.000664242	0.107527	0.000943304	0.156171	-0.00240157	0.134134	-0.000900936	0.125519	0.00169206	0.132137
2018-06-19T13:54:00	0.130742	-0.00327276	0.136066	-0.000373116	0.145986	-0.0124263	0.156589	-0.000521145	0.117212	-0.00278459	0.123804	0.000280154	0.133972	0.00267474	0.141301	0.000690248	0.156743	0.000843572	0.127472	-0.00130077	0.112443	0.000675726	0.136671	0.00301902	0.114155	-0.0075257	0.104893	0.00041487	0.117212	-0.000836068	0.0901706	0.00024146	0.119226	0.00218697	0.108051	0.000753952	0.0868134	-0.00200141	0.134871	0.000660256	0.107481	0.000942901	0.155689	-0.00239416	0.133294	-0.000895292	0.124272	0.00167525	0.131915
2018-06-19T13:57:00	0.130053	-0.00325551	0.13378	-0.000366847	0.145633	-0.0123962	0.157482	-0.000524117	0.120893	-0.00287204	0.120479	0.000272628	0.132511	0.00264558	0.139678	0.000682319	0.155858	0.000838808	0.127561	-0.00130167	0.111348	0.000669147	0.136424	0.00301356	0.114044	-0.00751839	0.102906	0.000407011	0.116221	-0.000829001	0.0897468	0.000240326	0.117602	0.00215719	0.108815	0.000759283	0.0862132	-0.00198758	0.134403	0.000657964	0.107503	0.000943096	0.154908	-0.00238214	0.133008	-0.000893374	0.125058	0.00168584	0.130684
2018-06-19T14:00:00	0.129095	-0.00323153	0.132601	-0.000363614	0.144009	-0.0122579	0.157581	-0.000524447	0.125108	-0.00297217	0.118251	0.000267587	0.131001	0.00261543	0.138695	0.000677517	0.155784	0.000838414	0.127596	-0.00130203	0.110033	0.000661244	0.135117	0.00298469	0.113434	-0.00747822	0.100957	0.000399302	0.113857	-0.000812137	0.0898918	0.000240714	0.116144	0.00213045	0.108302	0.000755702	0.0850853	-0.00196157	0.133496	0.000653528	0.107427	0.000942426	0.15402	-0.00236849	0.131414	-0.000882666	0.125247	0.00168839	0.130657
2018-06-19T14:03:00	0.128493	-0.00321646	0.131683	-0.000361096	0.143825	-0.0122423	0.157548	-0.000524336	0.130258	-0.00309452	0.116817	0.000264341	0.130123	0.00259791	0.140784	0.000687721	0.154895	0.00083363	0.127374	-0.00129976	0.110335	0.000663061	0.13432	0.00296708	0.112762	-0.00743389	0.0996779	0.000394242	0.111506	-0.000795364	0.0894176	0.000239444	0.113854	0.00208844	0.10853	0.000757297	0.083027	-0.00191412	0.132226	0.000647307	0.108009	0.000947537	0.153027	-0.00235322	0.130498	-0.000876512	0.124896	0.00168366	0.130545
2018-06-19T14:06:00	0.128441	-0.00321516	0.130957	-0.000359104	0.143032	-0.0121749	0.156532	-0.000520957	0.134933	-0.00320559	0.114822	0.000259827	0.129065	0.00257678	0.143494	0.000700956	0.155074	0.00083459	0.126747	-0.00129337	0.108497	0.000652015	0.133346	0.00294558	0.112359	-0.00740731	0.0983909	0.000389152	0.110745	-0.000789938	0.0892216	0.000238919	0.111511	0.00204545	0.10852	0.000757223	0.084159	-0.00194022	0.131343	0.000642986	0.107551	0.00094352	0.152766	-0.0023492	0.129412	-0.000869218	0.124226	0.00167462	0.128985
2018-06-19T14:09:00	0.126981	-0.00317863	0.131037	-0.000359325	0.139489	-0.0118732	0.155983	-0.000519128	0.141024	-0.00335028	0.112846	0.000255357	0.128068	0.00255686	0.148051	0.00072322	0.154621	0.000832155	0.126242	-0.00128821	0.105832	0.000635997	0.131482	0.00290439	0.112384	-0.00740899	0.096701	0.000382468	0.110149	-0.000785686	0.0889995	0.000238324	0.110228	0.00202193	0.108017	0.000753716	0.0871369	-0.00200887	0.129387	0.000633411	0.107012	0.000938789	0.152004	-0.00233749	0.127515	-0.000856476	0.123265	0.00166167	0.128911
2018-06-19T14:12:00	0.126019	-0.00315454	0.130553	-0.000357997	0.137703	-0.0117212	0.15553	-0.00051762	0.144602	-0.00343529	0.111277	0.000251807	0.126245	0.00252047	0.149566	0.000730618	0.153678	0.00082708	0.125584	-0.0012815	0.103378	0.00062125	0.130559	0.00288402	0.113417	-0.0074771	0.0941352	0.00037232	0.108941	-0.000777069	0.0882669	0.000236363	0.106974	0.00196224	0.108141	0.000754579	0.087491	-0.00201703	0.12862	0.000629653	0.106053	0.00093038	0.150445	-0.00231352	0.125728	-0.000844474	0.122423	0.00165032	0.128379
2018-06-19T14:15:00	0.124895	-0.00312641	0.130808	-0.000358698	0.136284	-0.0116004	0.154204	-0.000513207	0.148004	-0.00351612	0.109835	0.000248542	0.124139	0.00247843	0.153772	0.000751165	0.153465	0.000825931	0.124638	-0.00127185	0.101184	0.000608069	0.129267	0.00285547	0.113313	-0.00747025	0.0915284	0.00036201	0.107325	-0.000765545	0.0882764	0.000236388	0.104124	0.00190996	0.107377	0.000749248	0.0844435	-0.00194678	0.127366	0.000623519	0.1032	0.000905346	0.149471	-0.00229853	0.123652	-0.000830528	0.120519	0.00162465	0.127781
2018-06-19T14:18:00	0.122143	-0.00305751	0.129408	-0.000354857	0.135862	-0.0115645	0.152429	-0.000507299	0.153449	-0.00364547	0.107942	0.000244259	0.121506	0.00242586	0.157614	0.000769932	0.153084	0.000823882	0.123839	-0.00126369	0.0991905	0.000596086	0.128623	0.00284125	0.113617	-0.00749024	0.0898688	0.000355446	0.106068	-0.000756573	0.0888885	0.000238027	0.102668	0.00188325	0.107358	0.000749116	0.0840963	-0.00193877	0.125093	0.000612388	0.102622	0.000900277	0.147991	-0.00227578	0.122135	-0.00082034	0.118297	0.00159471	0.128346
2018-06-19T14:21:00	0.120549	-0.00301762	0.128201	-0.000351548	0.134147	-0.0114185	0.150302	-0.000500222	0.160228	-0.00380652	0.106267	0.000240469	0.118994	0.00237572	0.162515	0.000793873	0.151733	0.000816611	0.123648	-0.00126175	0.0978929	0.000588289	0.126589	0.00279633	0.11336	-0.00747329	0.0885064	0.000350057	0.103983	-0.000741705	0.0907598	0.000243038	0.100949	0.00185171	0.107069	0.000747101	0.0850738	-0.00196131	0.124585	0.000609901	0.100666	0.000883121	0.146867	-0.0022585	0.12152	-0.000816211	0.117192	0.00157981	0.127627
2018-06-19T14:24:00	0.119232	-0.00298466	0.126934	-0.000348073	0.131034	-0.0111536	0.148465	-0.000494106	0.1673	-0.00397451	0.10488	0.00023733	0.116487	0.00232565	0.166467	0.000813179	0.151228	0.00081389	0.123322	-0.00125842	0.0970664	0.000583321	0.126242	0.00278866	0.112955	-0.00744663	0.0873008	0.000345289	0.103002	-0.000734709	0.0918036	0.000245833	0.0993327	0.00182207	0.105539	0.00073642	0.0833249	-0.00192099	0.123365	0.000603929	0.0997457	0.000875043	0.14531	-0.00223455	0.120474	-0.000809186	0.115593	0.00155825	0.12755
2018-06-19T14:27:00	0.117106	-0.00293143	0.1264	-0.000346608	0.13003	-0.0110681	0.146776	-0.000488486	0.170609	-0.00405312	0.103048	0.000233185	0.114548	0.00228694	0.162157	0.000792128	0.150402	0.000809446	0.122988	-0.00125501	0.0962152	0.000578206	0.125177	0.00276513	0.112509	-0.00741724	0.0860735	0.000340435	0.102031	-0.00072778	0.0942804	0.000252466	0.0972258	0.00178342	0.104173	0.000726893	0.0817404	-0.00188446	0.122487	0.000599633	0.098644	0.000865379	0.144555	-0.00222294	0.119014	-0.000799379	0.115104	0.00155165	0.127329
2018-06-19T14:30:00	0.115664	-0.00289534	0.12636	-0.0003465	0.127816	-0.0108796	0.145428	-0.000483999	0.176716	-0.00419821	0.0999723	0.000226225	0.111882	0.00223371	0.161742	0.000790101	0.14888	0.000801254	0.122235	-0.00124732	0.0946114	0.000568569	0.124885	0.00275868	0.111835	-0.0073728	0.0828769	0.000327792	0.100202	-0.000714737	0.0955868	0.000255964	0.095188	0.00174604	0.103224	0.000720272	0.0834921	-0.00192485	0.121392	0.00059427	0.0971485	0.000852259	0.143126	-0.00220097	0.117372	-0.000788346	0.113706	0.00153282	0.127073
2018-06-19T14:33:00	0.114916	-0.0028766	0.125034	-0.000342862	0.126163	-0.0107389	0.143985	-0.000479199	0.182225	-0.00432908	0.0990634	0.000224168	0.109156	0.0021793	0.160953	0.000786245	0.147384	0.000793207	0.121222	-0.00123699	0.0920887	0.000553408	0.125336	0.00276865	0.112193	-0.00739636	0.0804708	0.000318275	0.0981689	-0.000700233	0.097688	0.000261591	0.0934281	0.00171376	0.101892	0.000710974	0.0848803	-0.00195685	0.119934	0.000587135	0.0959879	0.000842077	0.142712	-0.0021946	0.116196	-0.000780448	0.112752	0.00151995	0.126677
2018-06-19T14:36:00	0.113385	-0.00283828	0.123837	-0.000339581	0.125883	-0.0107151	0.142404	-0.000473935	0.189338	-0.00449807	0.097704	0.000221092	0.106588	0.00212803	0.156678	0.000765362	0.145538	0.000783269	0.120462	-0.00122924	0.0905631	0.00054424	0.124409	0.00274815	0.112009	-0.00738426	0.0789808	0.000312382	0.0976444	-0.000696492	0.0997453	0.0002671	0.0909013	0.00166741	0.100899	0.000704047	0.0867242	-0.00199936	0.118564	0.000580425	0.0947576	0.000831284	0.141193	-0.00217124	0.115042	-0.000772702	0.111007	0.00149643	0.125887
2018-06-19T14:39:00	0.112174	-0.00280797	0.122773	-0.000336663	0.125219	-0.0106586	0.140091	-0.000466237	0.193058	-0.00458646	0.096069	0.000217392	0.102903	0.00205445	0.152522	0.000745058	0.142964	0.000769414	0.119991	-0.00122443	0.0891764	0.000535907	0.12396	0.00273825	0.11096	-0.00731507	0.0775054	0.000306546	0.0945446	-0.000674381	0.103332	0.000276705	0.0882167	0.00161817	0.0992864	0.000692794	0.088367	-0.00203723	0.116417	0.000569917	0.093685	0.000821874	0.139045	-0.00213821	0.113883	-0.000764911	0.110351	0.00148758	0.12523
2018-06-19T14:42:00	0.110267	-0.00276023	0.120944	-0.000331647	0.124199	-0.0105718	0.136786	-0.00045524	0.200267	-0.00475771	0.0955071	0.000216121	0.0993392	0.0019833	0.151515	0.000740142	0.14166	0.000762399	0.119098	-0.00121532	0.0878723	0.00052807	0.12418	0.00274311	0.110074	-0.00725672	0.0763526	0.000301987	0.0925078	-0.000659853	0.10599	0.000283822	0.085468	0.00156775	0.0984761	0.00068714	0.0895349	-0.00206416	0.114242	0.000559269	0.092287	0.00080961	0.13729	-0.00211122	0.113404	-0.0007617	0.10805	0.00145657	0.125332
2018-06-19T14:45:00	0.108595	-0.00271839	0.120161	-0.000329502	0.123648	-0.0105249	0.135538	-0.000451084	0.205493	-0.00488187	0.0949254	0.000214804	0.0978794	0.00195416	0.146933	0.00071776	0.14017	0.000754381	0.118487	-0.00120908	0.0872221	0.000524162	0.124522	0.00275065	0.108968	-0.0071838	0.074118	0.000293149	0.0914856	-0.000652562	0.109662	0.000293656	0.0839076	0.00153913	0.0964683	0.00067313	0.0910531	-0.00209916	0.11284	0.000552407	0.0906244	0.000795025	0.135929	-0.00209029	0.112864	-0.000758071	0.107002	0.00144244	0.126028
2018-06-19T14:48:00	0.107639	-0.00269444	0.117477	-0.000322142	0.121278	-0.0103231	0.133152	-0.000443145	0.2096	-0.00497943	0.0939456	0.000212587	0.0957024	0.00191069	0.144202	0.000704419	0.137706	0.000741121	0.117806	-0.00120214	0.0869719	0.000522659	0.12388	0.00273647	0.107234	-0.00706949	0.0705538	0.000279052	0.0898389	-0.000640816	0.112256	0.0003006	0.0833752	0.00152936	0.0951598	0.000664	0.0923283	-0.00212856	0.110261	0.000539781	0.0881367	0.0007732	0.134528	-0.00206874	0.111004	-0.00074558	0.105872	0.00142721	0.126511
2018-06-19T14:51:00	0.106289	-0.00266066	0.115762	-0.000317438	0.118749	-0.0101079	0.131599	-0.000437976	0.214624	-0.00509879	0.092043	0.000208282	0.0927295	0.00185134	0.143193	0.000699491	0.135337	0.000728371	0.116883	-0.00119271	0.0872736	0.000524472	0.124256	0.00274478	0.10584	-0.00697755	0.0692759	0.000273998	0.0896636	-0.000639565	0.1139	0.000305005	0.0840862	0.0015424	0.0936016	0.000653127	0.0937054	-0.0021603	0.108014	0.00052878	0.0868464	0.000761881	0.133108	-0.00204691	0.110382	-0.000741396	0.105292	0.00141939	0.126696
2018-06-19T14:54:00	0.105023	-0.00262897	0.114909	-0.000315098	0.11689	-0.00994964	0.129948	-0.00043248	0.221596	-0.00526443	0.0930354	0.000210527	0.0915771	0.00182833	0.138908	0.000678555	0.134237	0.00072245	0.116508	-0.00118888	0.0864241	0.000519367	0.124055	0.00274035	0.104562	-0.00689334	0.0688115	0.000272161	0.0897039	-0.000639853	0.117015	0.000313346	0.0840077	0.00154096	0.0925679	0.000645914	0.0936009	-0.0021579	0.106624	0.000521975	0.0850662	0.000746264	0.131038	-0.00201507	0.1111	-0.000746219	0.105105	0.00141687	0.126733
2018-06-19T14:57:00	0.102714	-0.00257116	0.113211	-0.000310443	0.114857	-0.00977659	0.127171	-0.00042324	0.223458	-0.00530866	0.0930648	0.000210594	0.0897532	0.00179192	0.133484	0.000652061	0.131629	0.00070841	0.116267	-0.00118642	0.0853257	0.000512766	0.125005	0.00276134	0.103336	-0.0068125	0.0685821	0.000271254	0.088176	-0.000628954	0.120082	0.000321557	0.0836703	0.00153477	0.0927008	0.000646842	0.0943103	-0.00217425	0.105279	0.000515391	0.0828751	0.000727042	0.129585	-0.00199274	0.111319	-0.000747693	0.103987	0.0014018	0.126735
2018-06-19T15:00:00	0.101346	-0.00253691	0.111581	-0.000305972	0.113064	-0.00962393	0.126056	-0.000419529	0.228884	-0.00543756	0.0933742	0.000211294	0.0895074	0.00178701	0.127383	0.000622255	0.129093	0.000694764	0.115919	-0.00118287	0.0845598	0.000508163	0.125757	0.00277793	0.103365	-0.00681437	0.0699831	0.000276795	0.0866851	-0.00061832	0.12268	0.000328515	0.0850806	0.00156064	0.0909838	0.00063486	0.0923017	-0.00212794	0.104134	0.000509787	0.0810668	0.000711178	0.128874	-0.0019818	0.111884	-0.00075149	0.102171	0.00137732	0.126658
2018-06-19T15:03:00	0.100344	-0.00251184	0.109693	-0.000300795	0.112985	-0.00961728	0.124249	-0.000413515	0.234748	-0.00557686	0.0928396	0.000210084	0.0886443	0.00176978	0.127439	0.000622532	0.127167	0.000684397	0.116223	-0.00118597	0.0861085	0.00051747	0.12641	0.00279236	0.101972	-0.00672257	0.07069	0.00027959	0.0863731	-0.000616094	0.125775	0.000336803	0.0867729	0.00159168	0.0893772	0.00062365	0.0910255	-0.00209852	0.101463	0.000496707	0.0797051	0.000699232	0.127322	-0.00195794	0.113261	-0.000760735	0.100824	0.00135917	0.127433
2018-06-19T15:06:00	0.0992181	-0.00248365	0.108229	-0.000296782	0.1123	-0.0095589	0.123509	-0.000411051	0.238095	-0.00565638	0.0938334	0.000212333	0.0895089	0.00178704	0.120527	0.000588765	0.125274	0.000674209	0.116715	-0.001191	0.0877995	0.000527632	0.127625	0.0028192	0.101024	-0.00666007	0.0715596	0.00028303	0.0856092	-0.000610645	0.127922	0.000342551	0.0869783	0.00159545	0.0873752	0.000609681	0.0928572	-0.00214075	0.10068	0.000492878	0.0782074	0.000686093	0.125866	-0.00193555	0.115262	-0.000774174	0.0986959	0.00133047	0.12748
2018-06-19T15:09:00	0.0986227	-0.00246875	0.106829	-0.000292941	0.110792	-0.00943054	0.122233	-0.000406804	0.238082	-0.00565607	0.0936624	0.000211946	0.0890435	0.00177775	0.114698	0.000560291	0.12264	0.000660037	0.116121	-0.00118493	0.0889948	0.000534815	0.128698	0.00284291	0.0992992	-0.00654635	0.0733627	0.000290161	0.0850547	-0.00060669	0.130267	0.000348831	0.0889499	0.00163162	0.0864643	0.000603325	0.0907447	-0.00209205	0.0988582	0.000483957	0.0766257	0.000672218	0.124985	-0.001922	0.116063	-0.000779558	0.0963658	0.00129906	0.12742
2018-06-19T15:12:00	0.0987308	-0.00247146	0.106148	-0.000291076	0.110162	-0.00937692	0.12077	-0.000401937	0.240925	-0.00572362	0.0926395	0.000209632	0.0899315	0.00179548	0.111297	0.000543676	0.119894	0.000645255	0.116202	-0.00118576	0.0906089	0.000544515	0.130345	0.00287929	0.0983271	-0.00648226	0.0751275	0.000297141	0.0850311	-0.000606522	0.132055	0.000353618	0.0912346	0.00167352	0.0854745	0.000596418	0.0899833	-0.00207449	0.0972958	0.000476309	0.0754914	0.000662267	0.123292	-0.00189596	0.117095	-0.000786488	0.0951384	0.00128251	0.127501
2018-06-19T15:15:00	0.0983166	-0.00246109	0.105741	-0.000289959	0.109731	-0.00934029	0.119889	-0.000399002	0.244181	-0.00580096	0.0928869	0.000210191	0.0911972	0.00182075	0.107916	0.000527164	0.118848	0.000639624	0.116283	-0.00118659	0.0922349	0.000554287	0.132914	0.00293604	0.0983235	-0.00648203	0.0769348	0.00030429	0.0846535	-0.000603829	0.13378	0.000358238	0.0939497	0.00172333	0.0850819	0.000593679	0.0881943	-0.00203325	0.0974414	0.000477022	0.0747457	0.000655725	0.122216	-0.00187942	0.118971	-0.000799091	0.0949	0.0012793	0.127536
2018-06-19T15:18:00	0.0974329	-0.00243897	0.103816	-0.000284681	0.107583	-0.00915745	0.118197	-0.000393374	0.244365	-0.00580533	0.0928465	0.0002101	0.0916441	0.00182967	0.103457	0.000505379	0.116701	0.000628071	0.116391	-0.00118769	0.0933572	0.000561031	0.134366	0.00296811	0.0968794	-0.00638683	0.0785902	0.000310837	0.0843852	-0.000601915	0.13533	0.000362388	0.098533	0.0018074	0.0838956	0.000585401	0.0879157	-0.00202683	0.0960255	0.00047009	0.0736548	0.000646154	0.122047	-0.00187681	0.120262	-0.000807758	0.094328	0.00127159	0.127259
2018-06-19T15:21:00	0.0974968	-0.00244057	0.102343	-0.000280641	0.107043	-0.00911142	0.116983	-0.000389332	0.247356	-0.0058764	0.0920399	0.000208275	0.0925466	0.00184769	0.103803	0.000507072	0.115482	0.000621512	0.117099	-0.00119492	0.0948518	0.000570013	0.135984	0.00300385	0.0971389	-0.00640393	0.0831563	0.000328897	0.0859048	-0.000612754	0.137086	0.000367091	0.102971	0.00188881	0.0837671	0.000584504	0.0854306	-0.00196953	0.094736	0.000463778	0.0720114	0.000631738	0.12122	-0.0018641	0.12258	-0.000823327	0.094237	0.00127036	0.128519
2018-06-19T15:24:00	0.0976567	-0.00244457	0.101426	-0.000278127	0.106547	-0.00906922	0.117266	-0.000390273	0.248643	-0.00590696	0.0942159	0.000213199	0.0942127	0.00188095	0.103427	0.000505233	0.115027	0.00061906	0.118076	-0.00120489	0.0975977	0.000586514	0.137391	0.00303494	0.0973461	-0.00641759	0.08616	0.000340777	0.087525	-0.000624311	0.138062	0.000369704	0.106715	0.00195749	0.0841476	0.00058716	0.0823787	-0.00189917	0.0947962	0.000464072	0.0719055	0.000630809	0.120218	-0.0018487	0.124873	-0.000838732	0.0940926	0.00126842	0.129815
2018-06-19T15:27:00	0.0965763	-0.00241752	0.0994846	-0.000272803	0.106727	-0.00908455	0.116759	-0.000388587	0.245539	-0.00583324	0.0936975	0.000212026	0.0955119	0.00190689	0.101817	0.00049737	0.112831	0.000607244	0.118674	-0.00121099	0.0998076	0.000599795	0.138563	0.00306081	0.0984435	-0.00648994	0.0882979	0.000349233	0.0893052	-0.000637009	0.1388	0.00037168	0.109793	0.00201395	0.0849222	0.000592565	0.0826822	-0.00190617	0.0941999	0.000461153	0.072068	0.000632234	0.120292	-0.00184982	0.126804	-0.000851702	0.0938137	0.00126466	0.129519
2018-06-19T15:30:00	0.0968197	-0.00242362	0.0996863	-0.000273356	0.107197	-0.00912457	0.116049	-0.000386225	0.246098	-0.0058465	0.0945791	0.000214021	0.0985682	0.00196791	0.102713	0.000501746	0.110969	0.000597225	0.118916	-0.00121345	0.104179	0.000626063	0.140027	0.00309316	0.0996611	-0.00657021	0.0906505	0.000358537	0.0903304	-0.000644321	0.1398	0.000374359	0.113153	0.00207557	0.0861415	0.000601073	0.080641	-0.00185912	0.0933763	0.000457121	0.0729689	0.000640137	0.119444	-0.00183679	0.128974	-0.000866275	0.0942722	0.00127084	0.128987
2018-06-19T15:33:00	0.097966	-0.00245231	0.0988476	-0.000271056	0.107935	-0.00918737	0.115993	-0.000386036	0.242005	-0.00574928	0.0953445	0.000215753	0.101782	0.00203208	0.100054	0.000488757	0.109694	0.00059036	0.119199	-0.00121634	0.108328	0.000651001	0.141274	0.0031207	0.100507	-0.00662595	0.0924208	0.000365539	0.0911587	-0.00065023	0.140164	0.000375333	0.115898	0.00212592	0.0878301	0.000612855	0.0795647	-0.0018343	0.093913	0.000459749	0.0740511	0.000649632	0.119331	-0.00183504	0.13078	-0.000878403	0.0948522	0.00127866	0.130176
2018-06-19T15:36:00	0.0976054	-0.00244329	0.0977138	-0.000267947	0.107682	-0.00916582	0.116006	-0.000386082	0.23942	-0.00568786	0.0950166	0.00021501	0.103093	0.00205825	0.10024	0.000489664	0.108128	0.000581933	0.119571	-0.00122014	0.109915	0.000660536	0.142139	0.00313981	0.100937	-0.00665434	0.093005	0.00036785	0.0932982	-0.00066549	0.139842	0.000374471	0.118801	0.00217918	0.0887541	0.000619303	0.0801863	-0.00184863	0.0940334	0.000460338	0.0756597	0.000663743	0.119223	-0.00183339	0.1315	-0.000883241	0.0947661	0.0012775	0.130357
2018-06-19T15:39:00	0.0949059	-0.00237571	0.0966322	-0.000264981	0.105471	-0.00897764	0.114324	-0.000380482	0.230867	-0.00548467	0.0920777	0.00020836	0.103016	0.00205672	0.0945286	0.000461766	0.106538	0.000573375	0.118321	-0.00120738	0.112712	0.000677342	0.142401	0.00314561	0.0990431	-0.00652947	0.0937675	0.000370866	0.0915913	-0.000653315	0.136248	0.000364848	0.121894	0.00223591	0.090404	0.000630815	0.0788151	-0.00181702	0.0930045	0.000455301	0.0766182	0.000672151	0.116338	-0.00178903	0.130722	-0.000878018	0.0943965	0.00127251	0.129307
2018-06-19T15:42:00	0.092982	-0.00232755	0.0944633	-0.000259034	0.104722	-0.00891392	0.113203	-0.000376751	0.22676	-0.00538709	0.0907116	0.000205269	0.103552	0.0020674	0.0902619	0.000440923	0.105114	0.000565709	0.118194	-0.00120609	0.114752	0.000689605	0.142228	0.00314177	0.10006	-0.00659649	0.096033	0.000379826	0.0902194	-0.00064353	0.135114	0.00036181	0.125887	0.00230915	0.0911993	0.000636365	0.0757471	-0.00174629	0.0927331	0.000453972	0.0788452	0.000691688	0.115157	-0.00177086	0.131476	-0.000883083	0.0945436	0.0012745	0.129114
2018-06-19T15:45:00	0.0926291	-0.00231872	0.0942698	-0.000258503	0.104468	-0.00889226	0.112613	-0.000374787	0.221891	-0.00527143	0.0917894	0.000207708	0.105723	0.00211075	0.0833517	0.000407168	0.104824	0.00056415	0.118417	-0.00120836	0.116636	0.000700926	0.142398	0.00314554	0.101294	-0.00667785	0.0992728	0.00039264	0.0904172	-0.000644941	0.13247	0.00035473	0.128623	0.00235935	0.0923488	0.000644385	0.0750579	-0.0017304	0.0926884	0.000453753	0.0804986	0.000706193	0.114524	-0.00176112	0.132685	-0.000891201	0.0940279	0.00126754	0.129989
2018-06-19T15:48:00	0.0926573	-0.00231942	0.0943517	-0.000258727	0.105145	-0.00894988	0.111066	-0.00036964	0.217032	-0.00515599	0.0915474	0.00020716	0.10837	0.00216359	0.0821251	0.000401176	0.103457	0.000556796	0.119023	-0.00121455	0.118908	0.000714578	0.142617	0.00315036	0.101498	-0.00669133	0.101843	0.000402806	0.0909161	-0.0006485	0.131478	0.000352074	0.130638	0.00239631	0.0935249	0.000652592	0.0731981	-0.00168752	0.0924537	0.000452605	0.0824384	0.000723211	0.113551	-0.00174617	0.133113	-0.000894078	0.0954831	0.00128716	0.131002
2018-06-19T15:51:00	0.0927007	-0.00232051	0.0951823	-0.000261005	0.107386	-0.00914068	0.110677	-0.000368346	0.214907	-0.00510552	0.0933391	0.000211215	0.111576	0.00222761	0.0794463	0.00038809	0.103332	0.000556119	0.119901	-0.00122351	0.121047	0.000727435	0.143627	0.00317268	0.102389	-0.00675002	0.104458	0.000413149	0.0918989	-0.000655509	0.129556	0.000346927	0.133005	0.00243972	0.0949665	0.000662651	0.0738864	-0.00170339	0.0925993	0.000453317	0.0848399	0.000744278	0.11326	-0.0017417	0.13493	-0.000906282	0.0972227	0.00131061	0.132684
2018-06-19T15:54:00	0.0929279	-0.0023262	0.0955336	-0.000261969	0.108442	-0.00923057	0.110491	-0.000367726	0.206788	-0.00491263	0.0940093	0.000212731	0.114962	0.00229522	0.0729491	0.000356352	0.103498	0.000557013	0.12044	-0.00122901	0.122162	0.000734136	0.144165	0.00318456	0.10332	-0.00681144	0.106285	0.000420373	0.093907	-0.000669833	0.127876	0.00034243	0.134448	0.00246618	0.0965737	0.000673866	0.0726647	-0.00167523	0.0919516	0.000450147	0.0872248	0.0007652	0.113465	-0.00174485	0.136394	-0.000916113	0.0988636	0.00133273	0.133486
2018-06-19T15:57:00	0.0939932	-0.00235286	0.09579	-0.000262672	0.108897	-0.00926923	0.110398	-0.000367418	0.205899	-0.0048915	0.0939885	0.000212684	0.118335	0.00236255	0.0724347	0.000353839	0.10361	0.000557616	0.121548	-0.00124031	0.123039	0.000739407	0.143782	0.0031761	0.104661	-0.00689985	0.108434	0.000428875	0.0956252	-0.000682089	0.125695	0.000336588	0.136057	0.00249571	0.0990474	0.000691126	0.0744478	-0.00171633	0.0917466	0.000449143	0.0898623	0.000788339	0.113626	-0.00174732	0.137048	-0.000920504	0.101219	0.00136448	0.134533
2018-06-19T16:00:00	0.0949932	-0.0023779	0.0959815	-0.000263197	0.111598	-0.00949915	0.111022	-0.000369494	0.201249	-0.00478105	0.0948685	0.000214675	0.121621	0.00242816	0.0690882	0.000337491	0.104708	0.000563528	0.122891	-0.00125402	0.122931	0.000738758	0.145398	0.0032118	0.106201	-0.00700138	0.111563	0.000441251	0.0971412	-0.000692903	0.124135	0.00033241	0.135412	0.00248388	0.102402	0.000714532	0.0750368	-0.00172991	0.0924971	0.000452817	0.0918092	0.000805419	0.113049	-0.00173845	0.13848	-0.000930122	0.103263	0.00139204	0.136924
2018-06-19T16:03:00	0.0953727	-0.0023874	0.0966559	-0.000265046	0.113384	-0.00965118	0.112163	-0.000373291	0.197522	-0.00469249	0.0963069	0.00021793	0.123058	0.00245686	0.0699151	0.000341531	0.105985	0.0005704	0.124402	-0.00126944	0.122663	0.000737147	0.146209	0.00322972	0.107806	-0.00710717	0.113171	0.000447609	0.0997367	-0.000711416	0.122713	0.000328602	0.135359	0.00248291	0.104999	0.000732653	0.0747972	-0.00172439	0.0925954	0.000453298	0.0947255	0.000831002	0.113424	-0.00174422	0.13996	-0.000940064	0.10529	0.00141936	0.137656
2018-06-19T16:06:00	0.09705	-0.00242938	0.0976865	-0.000267872	0.117153	-0.00997206	0.113716	-0.000378459	0.195463	-0.00464357	0.0982127	0.000222243	0.125423	0.00250406	0.0695842	0.000339914	0.107704	0.000579653	0.126475	-0.0012906	0.123089	0.000739705	0.146914	0.0032453	0.109192	-0.00719851	0.115327	0.000456137	0.102502	-0.00073114	0.12313	0.000329718	0.13479	0.00247248	0.108271	0.000755489	0.0758896	-0.00174958	0.0938456	0.000459419	0.0976969	0.00085707	0.113946	-0.00175224	0.141389	-0.000949663	0.107168	0.00144468	0.140196
2018-06-19T16:09:00	0.0979627	-0.00245223	0.0972142	-0.000266577	0.120201	-0.0102314	0.114058	-0.000379599	0.187812	-0.00446181	0.101642	0.000230004	0.128568	0.00256686	0.0716583	0.000350046	0.108221	0.000582433	0.127947	-0.00130561	0.122102	0.000733773	0.148445	0.00327911	0.109488	-0.00721808	0.116486	0.000460723	0.104629	-0.000746312	0.123622	0.000331038	0.133676	0.00245203	0.109841	0.000766444	0.07689	-0.00177264	0.0942593	0.000461443	0.100597	0.000882508	0.113798	-0.00174997	0.141813	-0.000952512	0.110048	0.0014835	0.142278
2018-06-19T16:12:00	0.0997125	-0.00249603	0.0982999	-0.000269554	0.123883	-0.0105449	0.114362	-0.000380608	0.186716	-0.00443579	0.104828	0.000237214	0.130915	0.0026137	0.074801	0.000365398	0.109509	0.000589363	0.129115	-0.00131753	0.12164	0.000730995	0.149144	0.00329455	0.110603	-0.00729154	0.118048	0.000466898	0.10734	-0.000765646	0.123941	0.000331892	0.131634	0.00241458	0.112421	0.000784447	0.0770032	-0.00177525	0.0944559	0.000462406	0.103197	0.000905325	0.113907	-0.00175164	0.142611	-0.000957874	0.113118	0.00152489	0.144253
2018-06-19T16:15:00	0.101867	-0.00254996	0.10028	-0.000274983	0.126151	-0.0107379	0.115884	-0.000385676	0.17993	-0.00427457	0.106942	0.000241995	0.132762	0.00265059	0.0743282	0.000363088	0.111653	0.000600906	0.130864	-0.00133538	0.120024	0.000721285	0.150382	0.00332189	0.112834	-0.00743862	0.119893	0.000474196	0.110875	-0.000790866	0.12338	0.000330388	0.129397	0.00237354	0.115785	0.000807917	0.0778144	-0.00179395	0.0952151	0.000466123	0.10626	0.000932189	0.114478	-0.00176042	0.143159	-0.000961553	0.115631	0.00155876	0.147448
2018-06-19T16:18:00	0.10358	-0.00259285	0.101727	-0.000278951	0.129292	-0.0110053	0.116854	-0.000388903	0.176508	-0.00419328	0.110487	0.000250018	0.13498	0.00269487	0.0749402	0.000366078	0.113035	0.000608342	0.131787	-0.00134479	0.117737	0.000707542	0.150968	0.00333485	0.113831	-0.00750436	0.120771	0.00047767	0.113639	-0.000810577	0.123823	0.000331576	0.127293	0.00233495	0.117927	0.000822864	0.0777155	-0.00179167	0.0952967	0.000466522	0.108467	0.00095155	0.115416	-0.00177484	0.14392	-0.000966662	0.118028	0.00159107	0.149635
2018-06-19T16:21:00	0.105879	-0.0026504	0.103607	-0.000284108	0.133354	-0.0113511	0.118647	-0.000394869	0.172209	-0.00409113	0.113314	0.000256416	0.137122	0.00273763	0.0748124	0.000365454	0.114852	0.000618122	0.133206	-0.00135928	0.114533	0.000688287	0.151693	0.00335086	0.115756	-0.00763126	0.120481	0.000476521	0.117558	-0.000838533	0.124498	0.000333383	0.124317	0.00228037	0.120386	0.000840023	0.0781619	-0.00180196	0.0957509	0.000468746	0.110742	0.000971513	0.115613	-0.00177788	0.145129	-0.000974781	0.120798	0.00162841	0.151499
2018-06-19T16:24:00	0.10781	-0.00269872	0.10385	-0.000284774	0.136813	-0.0116455	0.120014	-0.00039942	0.16803	-0.00399186	0.115748	0.000261923	0.138375	0.00276266	0.078859	0.000385221	0.115969	0.000624133	0.134481	-0.00137228	0.11167	0.000671084	0.152232	0.00336278	0.11718	-0.00772513	0.120363	0.000476054	0.119711	-0.000853892	0.124756	0.000334074	0.121592	0.00223037	0.12248	0.000854631	0.0775583	-0.00178805	0.0963666	0.00047176	0.113199	0.000993063	0.115599	-0.00177767	0.144867	-0.000973024	0.124045	0.0016722	0.153768
2018-06-19T16:27:00	0.110108	-0.00275626	0.10536	-0.000288914	0.140633	-0.0119706	0.121426	-0.000404118	0.167343	-0.00397555	0.117443	0.000265759	0.139744	0.00278998	0.084888	0.000414672	0.116387	0.000626381	0.136222	-0.00139005	0.109548	0.000658327	0.153028	0.00338035	0.118691	-0.00782476	0.120696	0.000477373	0.122041	-0.000870513	0.124888	0.000334426	0.11895	0.00218191	0.123532	0.000861976	0.079707	-0.00183758	0.0977475	0.00047852	0.115675	0.00101479	0.116005	-0.00178391	0.145297	-0.000975909	0.126743	0.00170856	0.155763
2018-06-19T16:30:00	0.111676	-0.00279551	0.107555	-0.000294933	0.144077	-0.0122637	0.122463	-0.000407571	0.163196	-0.00387701	0.118956	0.000269181	0.140899	0.00281304	0.0902077	0.000440659	0.117991	0.000635012	0.13744	-0.00140248	0.107136	0.000643834	0.153863	0.0033988	0.119817	-0.00789898	0.120767	0.000477654	0.124012	-0.000884569	0.125518	0.000336113	0.115449	0.00211768	0.125842	0.00087809	0.0832323	-0.00191886	0.100069	0.000489883	0.11784	0.00103378	0.116348	-0.00178918	0.144911	-0.000973317	0.128902	0.00173766	0.158628
2018-06-19T16:33:00	0.113449	-0.00283988	0.109377	-0.00029993	0.146963	-0.0125094	0.123133	-0.000409801	0.162362	-0.0038572	0.120128	0.000271833	0.140787	0.00281081	0.0965876	0.000471824	0.118457	0.000637524	0.138636	-0.00141469	0.105084	0.000631502	0.154428	0.00341127	0.120446	-0.00794047	0.119647	0.000473224	0.124762	-0.00088992	0.126723	0.00033934	0.112531	0.00206416	0.127113	0.000886961	0.0828023	-0.00190894	0.101118	0.000495018	0.119167	0.00104542	0.11597	-0.00178337	0.144179	-0.000968405	0.129897	0.00175108	0.15953
2018-06-19T16:36:00	0.11542	-0.00288922	0.110778	-0.000303772	0.148737	-0.0126605	0.125533	-0.000417788	0.158882	-0.00377453	0.120531	0.000272746	0.140507	0.00280521	0.101714	0.000496867	0.118213	0.000636207	0.139106	-0.00141948	0.102539	0.000616212	0.154915	0.00342202	0.12194	-0.00803897	0.117693	0.000465496	0.126056	-0.000899149	0.127869	0.000342409	0.109293	0.00200478	0.12848	0.0008965	0.0834644	-0.00192421	0.102415	0.000501369	0.120086	0.00105348	0.116198	-0.00178688	0.143261	-0.000962234	0.13153	0.0017731	0.161177
2018-06-19T16:39:00	0.117892	-0.00295111	0.111202	-0.000304933	0.149915	-0.0127607	0.12603	-0.00041944	0.158217	-0.00375874	0.120654	0.000273025	0.139043	0.00277599	0.109114	0.000533016	0.118274	0.000636536	0.14038	-0.00143248	0.099447	0.000597628	0.155339	0.0034314	0.122611	-0.00808319	0.115333	0.000456162	0.126486	-0.000902217	0.129442	0.000346622	0.105599	0.00193702	0.129939	0.000906678	0.0850684	-0.00196118	0.103567	0.000507012	0.120719	0.00105904	0.116092	-0.00178525	0.141921	-0.000953237	0.132514	0.00178635	0.162421
2018-06-19T16:42:00	0.119826	-0.00299951	0.112079	-0.000307339	0.148307	-0.0126238	0.12704	-0.000422803	0.156691	-0.00372249	0.11961	0.000270661	0.138899	0.00277311	0.116624	0.0005697	0.119691	0.000644163	0.142365	-0.00145274	0.0954062	0.000573345	0.155304	0.00343062	0.124172	-0.00818609	0.113006	0.000446958	0.126228	-0.000900378	0.131104	0.000351071	0.101401	0.00186001	0.130647	0.000911621	0.0854365	-0.00196967	0.105059	0.000514313	0.121137	0.00106271	0.11582	-0.00178105	0.141197	-0.000948373	0.134087	0.00180755	0.164372
2018-06-19T16:45:00	0.120255	-0.00301027	0.112522	-0.000308553	0.147566	-0.0125608	0.127478	-0.00042426	0.152356	-0.00361949	0.120147	0.000271877	0.137373	0.00274264	0.124106	0.000606252	0.119938	0.000645492	0.143643	-0.00146578	0.0924989	0.000555873	0.155166	0.00342758	0.124873	-0.0082323	0.111034	0.000439157	0.126125	-0.000899645	0.131997	0.000353463	0.0977044	0.0017922	0.130566	0.000911057	0.087706	-0.00202199	0.106085	0.000519335	0.120417	0.00105639	0.11537	-0.00177413	0.139934	-0.000939893	0.134295	0.00181036	0.165752
2018-06-19T16:48:00	0.121301	-0.00303643	0.113461	-0.000311128	0.148909	-0.012675	0.129174	-0.000429906	0.151587	-0.00360122	0.121714	0.000275424	0.136012	0.00271548	0.130656	0.000638247	0.120676	0.000649464	0.14493	-0.00147891	0.0901768	0.000541919	0.155133	0.00342685	0.126122	-0.00831466	0.109081	0.000431432	0.125195	-0.00089301	0.132778	0.000355554	0.0946879	0.00173687	0.129637	0.000904576	0.0882434	-0.00203438	0.10667	0.000522201	0.119871	0.0010516	0.115034	-0.00176898	0.13989	-0.000939598	0.135131	0.00182163	0.1683
2018-06-19T16:51:00	0.12234	-0.00306245	0.113945	-0.000312457	0.149658	-0.0127388	0.130119	-0.000433051	0.149591	-0.0035538	0.120704	0.000273138	0.135112	0.00269751	0.138702	0.000677551	0.121425	0.000653497	0.145787	-0.00148766	0.0880027	0.000528853	0.154173	0.00340564	0.12639	-0.00833236	0.107574	0.000425473	0.122222	-0.000871804	0.13268	0.000355293	0.0909537	0.00166837	0.128927	0.00089962	0.0871174	-0.00200842	0.106879	0.000523221	0.118908	0.00104315	0.115014	-0.00176867	0.139985	-0.000940236	0.134922	0.00181882	0.169669
2018-06-19T16:54:00	0.122331	-0.00306221	0.113272	-0.00031061	0.148937	-0.0126775	0.130078	-0.000432915	0.14644	-0.00347896	0.120768	0.000273283	0.132981	0.00265496	0.146199	0.000714173	0.120558	0.000648832	0.146776	-0.00149775	0.0862047	0.000518048	0.153666	0.00339444	0.126288	-0.0083256	0.104286	0.00041247	0.119253	-0.000850627	0.132936	0.000355977	0.0876117	0.00160707	0.128987	0.000900034	0.0891244	-0.00205469	0.107064	0.000524128	0.116981	0.00102624	0.114392	-0.00175909	0.139293	-0.000935582	0.134788	0.00181701	0.170017
2018-06-19T16:57:00	0.122865	-0.00307559	0.114305	-0.000313441	0.149106	-0.0126918	0.130517	-0.000434375	0.143297	-0.00340428	0.120301	0.000272225	0.13106	0.00261662	0.153319	0.000748954	0.120227	0.000647048	0.146352	-0.00149342	0.0844763	0.000507662	0.153663	0.00339439	0.12548	-0.00827233	0.101075	0.000399767	0.117296	-0.000836664	0.132915	0.000355921	0.085197	0.00156278	0.128726	0.000898214	0.0909178	-0.00209604	0.106743	0.000522557	0.114576	0.00100515	0.114518	-0.00176104	0.138528	-0.000930444	0.133057	0.00179368	0.171683
2018-06-19T17:00:00	0.123258	-0.00308543	0.114483	-0.000313931	0.14877	-0.0126633	0.130649	-0.000434815	0.14042	-0.00333594	0.11742	0.000265707	0.128614	0.00256778	0.161446	0.000788655	0.119287	0.000641992	0.146357	-0.00149348	0.0832391	0.000500226	0.153368	0.00338785	0.125808	-0.00829397	0.0973447	0.000385014	0.115627	-0.000824758	0.132613	0.000355114	0.082739	0.00151769	0.127087	0.00088678	0.0919858	-0.00212066	0.107127	0.000524439	0.112295	0.000985134	0.113893	-0.00175142	0.138003	-0.000926921	0.13181	0.00177686	0.171868
2018-06-19T17:03:00	0.122785	-0.00307359	0.114334	-0.000313523	0.146988	-0.0125115	0.129933	-0.000432432	0.137342	-0.00326281	0.113981	0.000257926	0.126131	0.00251821	0.167677	0.000819089	0.118309	0.000636726	0.145801	-0.00148781	0.0812079	0.00048802	0.152902	0.00337757	0.124659	-0.00821822	0.0926567	0.000366472	0.113292	-0.000808108	0.132001	0.000353475	0.0809193	0.00148431	0.124476	0.000868563	0.0902024	-0.00207954	0.107439	0.000525964	0.109793	0.000963181	0.113054	-0.00173852	0.136361	-0.000915891	0.129401	0.00174439	0.171407
2018-06-19T17:06:00	0.122555	-0.00306782	0.113771	-0.000311977	0.145736	-0.012405	0.130502	-0.000434324	0.134776	-0.00320185	0.111922	0.000253265	0.123872	0.00247309	0.171846	0.000839457	0.117771	0.000633828	0.145605	-0.0014858	0.0816603	0.000490738	0.152493	0.00336853	0.123228	-0.00812386	0.0899965	0.000355951	0.111192	-0.000793126	0.13176	0.00035283	0.0794407	0.00145719	0.122286	0.000853282	0.0889394	-0.00205043	0.107813	0.000527796	0.107463	0.000942747	0.112021	-0.00172264	0.135037	-0.000906998	0.127289	0.00171593	0.171786
2018-06-19T17:21:00	0.122182	-0.0030585	0.112437	-0.000308321	0.143564	-0.0122201	0.130149	-0.00043315	0.131192	-0.0031167	0.10958	0.000247966	0.120857	0.00241291	0.175514	0.000857373	0.117288	0.000631234	0.144358	-0.00147307	0.080583	0.000484264	0.151501	0.00334662	0.121893	-0.00803585	0.0861361	0.000340682	0.109321	-0.000779781	0.129968	0.000348029	0.0786434	0.00144256	0.119238	0.000832008	0.0896592	-0.00206702	0.108018	0.000528799	0.104284	0.000914858	0.112345	-0.00172762	0.134017	-0.000900151	0.124966	0.00168461	0.170372
2018-06-19T17:24:00	0.120729	-0.00302212	0.110595	-0.00030327	0.138562	-0.0117943	0.129473	-0.000430902	0.128434	-0.00305119	0.105759	0.00023932	0.117585	0.00234759	0.180987	0.000884108	0.115803	0.000623237	0.143291	-0.00146219	0.0792087	0.000476006	0.150862	0.00333251	0.121278	-0.00799532	0.0845066	0.000334237	0.108545	-0.000774247	0.127542	0.000341533	0.0778163	0.00142739	0.116523	0.000813065	0.0915481	-0.00211057	0.107105	0.000524331	0.101342	0.000889045	0.11184	-0.00171986	0.132167	-0.000887719	0.123051	0.00165879	0.169779
2018-06-19T17:27:00	0.120158	-0.00300784	0.109623	-0.000300603	0.13553	-0.0115363	0.129745	-0.000431806	0.124447	-0.00295647	0.103474	0.000234149	0.115183	0.00229962	0.182883	0.000893371	0.114396	0.000615669	0.14249	-0.00145401	0.0788258	0.000473704	0.149637	0.00330545	0.120494	-0.00794362	0.0826488	0.000326889	0.106842	-0.000762096	0.124475	0.000333321	0.0758582	0.00139147	0.113245	0.000790196	0.0950289	-0.00219082	0.107058	0.000524098	0.0979069	0.000858912	0.110958	-0.0017063	0.130884	-0.000879105	0.120013	0.00161784	0.167331
2018-06-19T17:30:00	0.119589	-0.00299359	0.108386	-0.000297211	0.131674	-0.011208	0.128525	-0.000427744	0.118663	-0.00281906	0.0996419	0.000225477	0.112455	0.00224516	0.184771	0.000902597	0.112639	0.00060621	0.141475	-0.00144365	0.0775382	0.000465967	0.147773	0.00326428	0.118424	-0.00780719	0.078921	0.000312145	0.105697	-0.000753932	0.11971	0.000320561	0.074474	0.00136608	0.108779	0.00075903	0.0943302	-0.00217471	0.106241	0.000520101	0.0928067	0.000814169	0.109811	-0.00168865	0.128742	-0.000864717	0.116619	0.00157208	0.164541
2018-06-19T17:33:00	0.117412	-0.0029391	0.106723	-0.000292652	0.127952	-0.0108912	0.127729	-0.000425097	0.113299	-0.00269162	0.0966114	0.00021862	0.108872	0.00217363	0.183496	0.000896368	0.110944	0.000597086	0.140272	-0.00143138	0.0753297	0.000452695	0.146301	0.00323176	0.116346	-0.00767018	0.0738189	0.000291966	0.105853	-0.000755041	0.115348	0.000308882	0.0725596	0.00133097	0.104978	0.000732506	0.0916818	-0.00211365	0.104201	0.000510115	0.0889283	0.000780145	0.108429	-0.0016674	0.126302	-0.000848331	0.112715	0.00151946	0.161207
2018-06-19T17:36:00	0.115725	-0.00289686	0.105007	-0.000287947	0.123012	-0.0104707	0.1262	-0.000420009	0.109745	-0.00260719	0.093253	0.00021102	0.105058	0.00209748	0.184397	0.000900766	0.109587	0.000589783	0.137983	-0.00140802	0.0732932	0.000440456	0.144029	0.00318155	0.113511	-0.00748329	0.0694167	0.000274554	0.104472	-0.000745192	0.110435	0.000295724	0.071064	0.00130354	0.101192	0.000706088	0.0906338	-0.00208949	0.102595	0.00050225	0.0836938	0.000734224	0.106721	-0.00164113	0.123727	-0.000831032	0.108426	0.00146163	0.157791
2018-06-19T17:39:00	0.113833	-0.00284949	0.102454	-0.000280945	0.118741	-0.0101072	0.124143	-0.000413161	0.104895	-0.00249196	0.0907691	0.000205399	0.10102	0.00201687	0.18248	0.000891401	0.107723	0.000579755	0.136002	-0.0013878	0.0714064	0.000429117	0.142677	0.00315169	0.110975	-0.00731609	0.0660477	0.000261229	0.103552	-0.00073863	0.104885	0.000280864	0.0693424	0.00127196	0.0970799	0.000677397	0.0874981	-0.0020172	0.0999398	0.000489253	0.0792768	0.000695475	0.104524	-0.00160736	0.120586	-0.000809939	0.104353	0.00140672	0.154468
2018-06-19T17:42:00	0.111687	-0.00279577	0.100107	-0.000274509	0.11389	-0.00969425	0.121799	-0.000405359	0.0965426	-0.00229355	0.0866992	0.000196189	0.0972413	0.00194142	0.17684	0.000863851	0.105954	0.000570231	0.133935	-0.00136672	0.0689993	0.000414652	0.140429	0.00310204	0.108146	-0.00712958	0.0630561	0.000249397	0.103172	-0.000735917	0.100228	0.000268391	0.0674523	0.00123728	0.0923431	0.000644346	0.0830163	-0.00191387	0.0983197	0.000481321	0.0745851	0.000654316	0.102785	-0.00158061	0.116917	-0.000785292	0.100529	0.00135519	0.150614
2018-06-19T17:45:00	0.109074	-0.00273038	0.0979712	-0.000268653	0.109331	-0.00930624	0.119531	-0.000397813	0.0897791	-0.00213287	0.0812654	0.000183893	0.0940969	0.00187864	0.174952	0.000854629	0.103801	0.000558643	0.131606	-0.00134295	0.066757	0.000401177	0.138075	0.00305004	0.104921	-0.00691699	0.058866	0.000232825	0.102892	-0.00073392	0.0931729	0.0002495	0.0656376	0.001204	0.0871402	0.000608041	0.0797314	-0.00183814	0.0957699	0.000468839	0.0703941	0.000617549	0.100342	-0.00154304	0.113542	-0.000762625	0.0965572	0.00130164	0.146405
2018-06-19T17:48:00	0.106538	-0.00266688	0.0944204	-0.000258916	0.104604	-0.00890384	0.116876	-0.000388974	0.0831807	-0.00197611	0.0766454	0.000173439	0.0904008	0.00180485	0.168233	0.000821805	0.101074	0.00054397	0.129004	-0.0013164	0.0640735	0.00038505	0.135332	0.00298946	0.102259	-0.00674145	0.0535985	0.000211991	0.102637	-0.000732107	0.0874033	0.00023405	0.0646987	0.00118677	0.0823237	0.000574432	0.0754101	-0.00173852	0.093217	0.000456341	0.0651262	0.000571336	0.0979864	-0.00150682	0.109534	-0.000735707	0.0927893	0.00125085	0.141545
2018-06-19T17:51:00	0.103777	-0.00259778	0.0919099	-0.000252032	0.0990581	-0.00843179	0.115316	-0.000383784	0.0786689	-0.00186892	0.0725447	0.000164159	0.0871391	0.00173973	0.161509	0.000788959	0.097976	0.000527296	0.125849	-0.00128421	0.06253	0.000375775	0.131604	0.00290709	0.099434	-0.00655524	0.0500112	0.000197802	0.102918	-0.000734106	0.0809245	0.000216701	0.0635263	0.00116527	0.0779682	0.000544041	0.0700364	-0.00161463	0.0908569	0.000444787	0.0605769	0.000531426	0.0953512	-0.00146629	0.105815	-0.000710727	0.0883859	0.00119149	0.136901
2018-06-19T17:54:00	0.100951	-0.00252704	0.0885881	-0.000242923	0.0934358	-0.00795322	0.112285	-0.000373696	0.0718779	-0.00170759	0.066732	0.000151006	0.0840086	0.00167723	0.152593	0.000745406	0.0942366	0.000507171	0.123148	-0.00125664	0.0601752	0.000361624	0.127738	0.0028217	0.0956738	-0.00630734	0.0467926	0.000185072	0.10083	-0.000719217	0.0743362	0.000199059	0.061763	0.00113292	0.0731621	0.000510506	0.0659328	-0.00152003	0.0875586	0.000428641	0.0567592	0.000497934	0.0920501	-0.00141553	0.100737	-0.000676617	0.0841284	0.00113409	0.130765
2018-06-19T17:57:00	0.0979248	-0.00245128	0.0855642	-0.000234631	0.0888966	-0.00756684	0.109185	-0.000363379	0.0671074	-0.00159426	0.0628706	0.000142268	0.0791314	0.00157985	0.147776	0.000721874	0.0918288	0.000494212	0.119784	-0.00122232	0.0570452	0.000342813	0.123681	0.00273209	0.0920682	-0.00606965	0.0442578	0.000175047	0.098651	-0.000703672	0.0675975	0.000181014	0.0586674	0.00107614	0.0684201	0.000477417	0.0601826	-0.00138746	0.0845964	0.000414139	0.0534481	0.000468886	0.0900931	-0.00138544	0.0963186	-0.00064694	0.0793001	0.00106901	0.124528
2018-06-19T18:00:00	0.0939873	-0.00235272	0.0833608	-0.000228589	0.0835806	-0.00711435	0.107051	-0.000356278	0.0631783	-0.00150092	0.058747	0.000132937	0.0766871	0.00153105	0.139788	0.000682855	0.0895951	0.000482191	0.116364	-0.00118742	0.0539374	0.000324138	0.119709	0.00264434	0.0881891	-0.00581391	0.0405666	0.000160448	0.0960258	-0.000684946	0.0615004	0.000164687	0.0561046	0.00102913	0.0644856	0.000449963	0.0553674	-0.00127645	0.082506	0.000403906	0.0509047	0.000446574	0.0880243	-0.00135362	0.0916613	-0.000615658	0.0756595	0.00101993	0.119515
2018-06-19T18:03:00	0.090669	-0.00226965	0.079817	-0.000218871	0.079555	-0.00677169	0.102707	-0.000341822	0.0575174	-0.00136643	0.0559379	0.00012658	0.0730631	0.0014587	0.13201	0.000644861	0.0867002	0.000466611	0.113709	-0.00116033	0.0503027	0.000302295	0.115442	0.00255009	0.0848957	-0.00559679	0.0364288	0.000144082	0.0930731	-0.000663885	0.0545025	0.000145948	0.0549938	0.00100876	0.0603539	0.000421133	0.0522591	-0.00120479	0.0792528	0.00038798	0.0477067	0.000418518	0.0856109	-0.00131651	0.086357	-0.000580031	0.0716179	0.000965446	0.114298
2018-06-19T18:06:00	0.0875979	-0.00219277	0.0770323	-0.000211235	0.0759865	-0.00646794	0.0996655	-0.000331698	0.0545938	-0.00129697	0.0520285	0.000117734	0.0697743	0.00139304	0.126274	0.000616842	0.0842031	0.000453172	0.110327	-0.00112581	0.0476825	0.000286549	0.111602	0.00246526	0.0819611	-0.00540333	0.0333667	0.000131971	0.0917264	-0.000654279	0.0484217	0.000129664	0.0521468	0.000956534	0.0561742	0.000391969	0.0498483	-0.00114921	0.0761601	0.00037284	0.0451401	0.000396003	0.0837265	-0.00128753	0.0806714	-0.000541843	0.067642	0.000911849	0.109502
2018-06-19T18:09:00	0.0845028	-0.0021153	0.0752423	-0.000206327	0.0726216	-0.00618152	0.0967428	-0.000321971	0.0542117	-0.0012879	0.0500203	0.00011319	0.0669848	0.00133735	0.118685	0.00057977	0.0821286	0.000442007	0.107025	-0.00109212	0.0445534	0.000267744	0.106714	0.00235727	0.078443	-0.0051714	0.0305523	0.000120839	0.0929404	-0.000662938	0.0435875	0.000116719	0.0502136	0.000921072	0.0520545	0.000363222	0.04617	-0.00106441	0.0735366	0.000359996	0.0428784	0.000376162	0.0806415	-0.00124009	0.0755208	-0.000507248	0.0644607	0.000868963	0.104362
2018-06-19T18:12:00	0.0803358	-0.00201099	0.0726531	-0.000199226	0.0684586	-0.00582717	0.0925206	-0.000307919	0.0491731	-0.0011682	0.0473443	0.000107134	0.0628499	0.0012548	0.111241	0.000543405	0.0793081	0.000426828	0.103701	-0.0010582	0.0394391	0.00023701	0.102598	0.00226636	0.07461	-0.00491871	0.0270642	0.000107043	0.0916486	-0.000653724	0.03833	0.000102641	0.0482512	0.000885077	0.0490236	0.000342074	0.0431195	-0.000994086	0.0704926	0.000345094	0.0399675	0.000350625	0.0786448	-0.00120939	0.0692712	-0.000465272	0.0612784	0.000826064	0.0988371
2018-06-19T18:15:00	0.0770476	-0.00192868	0.0699908	-0.000191926	0.0647788	-0.00551395	0.0884065	-0.000294226	0.0467385	-0.00111036	0.0448175	0.000101416	0.0601113	0.00120012	0.102837	0.00050235	0.0764835	0.000411626	0.0997477	-0.00101786	0.0343	0.000206126	0.0979907	0.00216459	0.0711371	-0.00468975	0.0246986	9.76871e-05	0.0902709	-0.000643897	0.0332303	8.89848e-05	0.0457925	0.000839977	0.0452674	0.000315864	0.0378287	-0.000872112	0.067662	0.000331238	0.0383017	0.000336011	0.0762011	-0.00117181	0.0634577	-0.000426224	0.0563578	0.000759732	0.0929896
2018-06-19T18:18:00	0.0735933	-0.00184221	0.0671519	-0.000184141	0.0628969	-0.00535376	0.0845487	-0.000281387	0.0458432	-0.00108909	0.0424623	9.60868e-05	0.0563956	0.00112594	0.0984122	0.000480737	0.0743175	0.000399969	0.0957302	-0.000976862	0.0299926	0.000180241	0.0935978	0.00206755	0.0674222	-0.00444484	0.0208438	8.24406e-05	0.0887468	-0.000633026	0.028686	7.68158e-05	0.0432488	0.000793318	0.0421108	0.000293838	0.0336588	-0.000775978	0.0643034	0.000314795	0.036952	0.00032417	0.0737634	-0.00113432	0.0580661	-0.000390011	0.0527979	0.000711742	0.0875102
2018-06-19T18:21:00	0.0696918	-0.00174454	0.0653483	-0.000179196	0.061119	-0.00520243	0.0819324	-0.00027268	0.0451249	-0.00107202	0.0416854	9.43288e-05	0.0530909	0.00105996	0.0908324	0.00044371	0.0728358	0.000391994	0.0920617	-0.000939427	0.0262085	0.0001575	0.0894022	0.00197487	0.0641104	-0.00422651	0.0186673	7.38323e-05	0.0863438	-0.000615885	0.0242028	6.48108e-05	0.0394624	0.000723863	0.038083	0.000265733	0.0370975	-0.000855253	0.0626046	0.000306479	0.0356588	0.000312825	0.0713084	-0.00109657	0.0539793	-0.000362561	0.0502568	0.000677487	0.0825933
2018-06-19T18:24:00	0.066151	-0.00165591	0.0617495	-0.000169327	0.0589478	-0.00501761	0.0788695	-0.000262486	0.0425037	-0.00100975	0.0399824	9.04752e-05	0.0500101	0.00099845	0.0810587	0.000395966	0.0701867	0.000377737	0.0877798	-0.000895734	0.0220791	0.000132685	0.0848764	0.0018749	0.060731	-0.00400372	0.0180867	7.1536e-05	0.0845888	-0.000603367	0.0202708	5.42815e-05	0.037494	0.000687756	0.0348296	0.000243032	0.0342343	-0.000789245	0.0598804	0.000293143	0.0343929	0.00030172	0.0697279	-0.00107226	0.04923	-0.000330661	0.0475503	0.000641003	0.0777941
2018-06-19T18:27:00	0.063254	-0.00158339	0.0594997	-0.000163158	0.0578657	-0.00492551	0.0754967	-0.000251261	0.0419063	-0.000995561	0.0386825	8.75336e-05	0.0478036	0.000954397	0.0746169	0.000364498	0.0667417	0.000359197	0.0846464	-0.00086376	0.0187686	0.00011279	0.0805002	0.00177823	0.0572255	-0.00377262	0.0167843	6.63848e-05	0.0824383	-0.000588027	0.017294	4.63101e-05	0.0344742	0.000632365	0.0327539	0.000228548	0.0338359	-0.000780061	0.0568306	0.000278213	0.0336986	0.000295629	0.0675586	-0.0010389	0.0438621	-0.000294608	0.0443551	0.00059793	0.0731211
2018-06-19T18:30:00	0.060669	-0.00151868	0.0574853	-0.000157634	0.0566246	-0.00481986	0.0724245	-0.000241037	0.0433369	-0.00102955	0.0381909	8.64212e-05	0.0459108	0.000916607	0.0670557	0.000327563	0.0649876	0.000349756	0.0805878	-0.000822344	0.0148009	8.8946e-05	0.0763215	0.00168592	0.054607	-0.00359999	0.0163445	6.46453e-05	0.0797081	-0.000568553	0.0146656	3.92719e-05	0.03086	0.000566068	0.0312072	0.000217755	0.0324624	-0.000748394	0.0555854	0.000272117	0.0332935	0.000292075	0.065385	-0.00100548	0.0398146	-0.000267422	0.0412557	0.000556148	0.0692397
2018-06-19T18:33:00	0.0581559	-0.00145577	0.0549414	-0.000150658	0.055909	-0.00475895	0.0688842	-0.000229254	0.0422908	-0.0010047	0.0385107	8.71448e-05	0.0445194	0.000888827	0.0591239	0.000288816	0.0623746	0.000335693	0.0770107	-0.000785842	0.0104596	6.28569e-05	0.0723118	0.00159735	0.0507908	-0.00334841	0.0139995	5.53705e-05	0.0763889	-0.000544877	0.0123029	3.2945e-05	0.0291342	0.000534412	0.0290216	0.000202505	0.0304249	-0.000701421	0.0529233	0.000259085	0.0324347	0.000284541	0.0645718	-0.000992973	0.0350652	-0.000235521	0.0400921	0.000540462	0.0647055
2018-06-19T18:36:00	0.0566256	-0.00141747	0.0526784	-0.000144453	0.0555494	-0.00472834	0.0661149	-0.000220038	0.0428881	-0.00101888	0.0382939	8.66542e-05	0.0433518	0.000865517	0.0530899	0.000259341	0.0605478	0.000325862	0.074166	-0.000756814	0.00621327	3.73387e-05	0.0691427	0.00152735	0.0478788	-0.00315643	0.0137301	5.43048e-05	0.0745779	-0.000531959	0.0105623	2.82838e-05	0.027645	0.000507094	0.0277312	0.000193501	0.0302834	-0.00069816	0.0506184	0.000247801	0.0315987	0.000277207	0.0625945	-0.000962568	0.0315895	-0.000212176	0.037947	0.000511546	0.0613992
2018-06-19T18:39:00	0.0551936	-0.00138162	0.0505376	-0.000138582	0.0555473	-0.00472816	0.0643451	-0.000214147	0.0444401	-0.00105576	0.0401987	9.09645e-05	0.0431103	0.000860694	0.0483806	0.000236336	0.0598607	0.000322164	0.0716346	-0.000730983	0.00167504	1.00662e-05	0.0664421	0.00146769	0.045026	-0.00296836	0.014256	5.6385e-05	0.0724337	-0.000516665	0.0098335	2.63323e-05	0.0261144	0.000479019	0.0262383	0.000183084	0.0296565	-0.000683707	0.0493957	0.000241815	0.031071	0.000272578	0.0608818	-0.000936229	0.0285057	-0.000191463	0.0363522	0.000490046	0.0592837
2018-06-19T18:42:00	0.0529108	-0.00132448	0.0483354	-0.000132543	0.0565409	-0.00481274	0.0619425	-0.000206151	0.0422413	-0.00100352	0.0405284	9.17108e-05	0.0417413	0.000833364	0.043891	0.000214405	0.0581777	0.000313106	0.0695364	-0.000709572	-0.00312784	-1.87968e-05	0.06385	0.00141043	0.0424217	-0.00279667	0.0137824	5.45115e-05	0.0701872	-0.000500641	0.00939367	2.51545e-05	0.024763	0.00045423	0.025079	0.000174995	0.0282741	-0.000651836	0.0475093	0.000232581	0.0311799	0.000273533	0.0594292	-0.000913891	0.0262974	-0.000176631	0.0356626	0.00048075	0.0568404
2018-06-19T18:45:00	0.0508752	-0.00127352	0.0473719	-0.000129901	0.0582172	-0.00495542	0.0603394	-0.000200816	0.0449773	-0.00106852	0.0421868	9.54634e-05	0.0417014	0.000832566	0.0416351	0.000203385	0.0577223	0.000310655	0.0672388	-0.000686126	-0.00556267	-3.3429e-05	0.0620297	0.00137022	0.0409239	-0.00269793	0.014418	5.70255e-05	0.0674535	-0.000481142	0.0106848	2.86119e-05	0.0241413	0.000442826	0.0242049	0.000168895	0.0291249	-0.000671452	0.0462418	0.000226375	0.0310531	0.000272421	0.0580228	-0.000892265	0.02497	-0.000167715	0.0363577	0.00049012	0.0545759
2018-06-19T18:48:00	0.0504549	-0.001263	0.0469179	-0.000128656	0.0606479	-0.00516232	0.0589635	-0.000196237	0.0443853	-0.00105446	0.04426	0.000100155	0.0423971	0.000846456	0.0374973	0.000183172	0.0569912	0.00030672	0.0650489	-0.00066378	-0.00711985	-4.27868e-05	0.0601891	0.00132956	0.0397622	-0.00262134	0.0150203	5.94077e-05	0.0654281	-0.000466695	0.0130328	3.48993e-05	0.0225993	0.000414541	0.0244235	0.00017042	0.0273716	-0.00063103	0.0457488	0.000223962	0.0321725	0.000282241	0.0567956	-0.000873392	0.0240915	-0.000161815	0.0360889	0.000486497	0.0541794
2018-06-19T18:51:00	0.0495443	-0.00124021	0.0454012	-0.000124497	0.0618315	-0.00526307	0.0574627	-0.000191242	0.0447682	-0.00106355	0.0454523	0.000102853	0.0422359	0.000843237	0.0365018	0.000178309	0.0553826	0.000298063	0.0634595	-0.000647561	-0.0102343	-6.15033e-05	0.0584612	0.00129139	0.0376355	-0.00248114	0.0139611	5.52184e-05	0.064751	-0.000461865	0.0156528	4.19153e-05	0.0208303	0.000382092	0.023594	0.000164633	0.0304132	-0.000701152	0.0453308	0.000221915	0.0333566	0.000292629	0.054964	-0.000845226	0.0226983	-0.000152457	0.0367506	0.000495417	0.0536903
2018-06-19T18:54:00	0.0468312	-0.00117229	0.0440337	-0.000120748	0.0602471	-0.00512821	0.0557268	-0.000185465	0.0393837	-0.000935631	0.0444849	0.000100664	0.0404967	0.000808515	0.0331906	0.000162134	0.0534823	0.000287836	0.0591991	-0.000604087	-0.0133287	-8.00993e-05	0.0553907	0.00122357	0.0348505	-0.00229753	0.0123545	4.88642e-05	0.0610112	-0.00043519	0.0155488	4.16368e-05	0.0192088	0.00035235	0.0227854	0.00015899	0.0296033	-0.000682482	0.0433339	0.00021214	0.0324619	0.00028478	0.0516058	-0.000793585	0.0208886	-0.000140302	0.0360064	0.000485385	0.0510365
2018-06-19T18:57:00	0.0446758	-0.00111834	0.0419673	-0.000115081	0.0586119	-0.00498902	0.0535507	-0.000178223	0.0383639	-0.000911404	0.043347	9.80887e-05	0.0393323	0.000785268	0.0324201	0.00015837	0.0522221	0.000281053	0.0558231	-0.000569637	-0.0163132	-9.80346e-05	0.0527286	0.00116476	0.0326612	-0.0021532	0.0106257	4.20262e-05	0.0569197	-0.000406005	0.0162428	4.34953e-05	0.0179985	0.000330148	0.0223289	0.000155805	0.028395	-0.000654623	0.0415788	0.000203548	0.0317709	0.000278718	0.0485783	-0.000747029	0.0187182	-0.000125724	0.0351872	0.000474342	0.048697
2018-06-19T19:00:00	0.0425256	-0.00106451	0.041357	-0.000113408	0.0568732	-0.00484102	0.0520742	-0.000173309	0.0348711	-0.000828427	0.0431289	9.75954e-05	0.0382673	0.000764004	0.0280334	0.000136941	0.0503912	0.0002712	0.0524268	-0.00053498	-0.0186959	-0.000112353	0.0505963	0.00111766	0.0310722	-0.00204845	0.0110017	4.35136e-05	0.0534838	-0.000381497	0.0159997	4.28442e-05	0.0172855	0.00031707	0.0211512	0.000147587	0.0279222	-0.000643724	0.0405785	0.000198651	0.0312211	0.000273895	0.0459892	-0.000707214	0.0171661	-0.000115299	0.033253	0.000448267	0.0477195
2018-06-19T19:03:00	0.0397065	-0.000993943	0.0397792	-0.000109081	0.0548769	-0.0046711	0.0500186	-0.000166467	0.0319241	-0.000758416	0.041816	9.46245e-05	0.0368111	0.000734932	0.0278559	0.000136074	0.0479723	0.000258182	0.0496485	-0.00050663	-0.0202873	-0.000121917	0.048097	0.00106245	0.029457	-0.00194197	0.0108824	4.30417e-05	0.0499203	-0.000356079	0.0169757	4.54578e-05	0.0162802	0.00029863	0.0198048	0.000138193	0.0264249	-0.000609206	0.0392867	0.000192327	0.0306409	0.000268804	0.0429724	-0.000660822	0.0151301	-0.000101624	0.0318738	0.000429675	0.046788
2018-06-19T19:06:00	0.0379654	-0.000950361	0.0393653	-0.000107946	0.054265	-0.00461902	0.0482748	-0.000160664	0.0319192	-0.000758298	0.0413667	9.36078e-05	0.0364916	0.000728552	0.0271986	0.000132863	0.0466238	0.000250924	0.0472392	-0.000482044	-0.021664	-0.00013019	0.0457828	0.00101133	0.028555	-0.00188251	0.0111515	4.41058e-05	0.0456251	-0.000325441	0.0177597	4.75573e-05	0.0158162	0.000290118	0.0170183	0.000118749	0.0233568	-0.000538474	0.0385576	0.000188758	0.0306094	0.000268528	0.0412312	-0.000634045	0.0150023	-0.000100766	0.0319888	0.000431225	0.0460667
2018-06-19T19:09:00	0.0355507	-0.000889915	0.0387015	-0.000106126	0.0524534	-0.00446481	0.0461067	-0.000153448	0.0259323	-0.00061607	0.0397207	8.98829e-05	0.0356805	0.00071236	0.024706	0.000120687	0.0454225	0.000244459	0.0440204	-0.000449198	-0.0214743	-0.00012905	0.0436798	0.000964876	0.0270891	-0.00178587	0.0115199	4.55631e-05	0.0417061	-0.000297487	0.0185643	4.97118e-05	0.0152856	0.000280386	0.0155197	0.000108292	0.0213124	-0.000491341	0.0381345	0.000186686	0.0300828	0.000263909	0.0391476	-0.000602004	0.0146899	-9.86673e-05	0.0300747	0.000405422	0.0455167
2018-06-19T19:12:00	0.0340267	-0.000851765	0.0375257	-0.000102902	0.0498318	-0.00424166	0.0441701	-0.000147003	0.0241461	-0.000573635	0.0380925	8.61986e-05	0.0357559	0.000713865	0.0252253	0.000123224	0.0429869	0.000231351	0.0415954	-0.000424453	-0.0203404	-0.000122236	0.0407085	0.00089924	0.0263001	-0.00173385	0.0106677	4.21925e-05	0.0375804	-0.000268059	0.0190772	5.10853e-05	0.0154669	0.000283711	0.0136303	9.51083e-05	0.0203713	-0.000469644	0.0364176	0.000178281	0.029434	0.000258217	0.0370185	-0.000569263	0.0135828	-9.12311e-05	0.0288392	0.000388767	0.0445001
2018-06-19T19:15:00	0.0322548	-0.000807411	0.0370594	-0.000101623	0.0470507	-0.00400493	0.0421157	-0.000140166	0.0211773	-0.000503106	0.0363563	8.22698e-05	0.0362249	0.000723228	0.0218886	0.000106924	0.0415946	0.000223857	0.0391475	-0.000399473	-0.0201105	-0.000120854	0.0388529	0.00085825	0.0259004	-0.0017075	0.0102875	4.06886e-05	0.03182	-0.00022697	0.0194445	5.20687e-05	0.0141279	0.00025915	0.0129914	9.06505e-05	0.0201141	-0.000463716	0.0353427	0.000173019	0.0283392	0.000248612	0.034484	-0.000530289	0.0134855	-9.05776e-05	0.0283501	0.000382173	0.0442229
2018-06-19T19:18:00	0.029862	-0.000747513	0.0364848	-0.000100047	0.0427802	-0.00364144	0.0395769	-0.000131716	0.0192141	-0.000456466	0.0340725	7.71017e-05	0.0347368	0.000693519	0.0224716	0.000109772	0.0399334	0.000214917	0.0368589	-0.000376121	-0.0202026	-0.000121408	0.036808	0.000813079	0.0259427	-0.00171029	0.00953112	3.76971e-05	0.0268189	-0.000191298	0.0192621	5.15804e-05	0.01349	0.000247449	0.0110598	7.71721e-05	0.0207695	-0.000478825	0.0336171	0.000164571	0.0270807	0.000237572	0.0322585	-0.000496066	0.0128943	-8.6607e-05	0.0273903	0.000369236	0.0426623
2018-06-19T19:21:00	0.0288016	-0.00072097	0.0347136	-9.51904e-05	0.0409714	-0.00348747	0.0381442	-0.000126948	0.018284	-0.000434371	0.0321575	7.27684e-05	0.0324699	0.000648261	0.0238088	0.000116304	0.038944	0.000209592	0.0347385	-0.000354483	-0.0195772	-0.000117649	0.0353309	0.00078045	0.0263479	-0.001737	0.00870008	3.44102e-05	0.0216683	-0.000154558	0.0195282	5.22928e-05	0.0125578	0.000230349	0.0112619	7.85824e-05	0.0186361	-0.00042964	0.0328136	0.000160638	0.0266486	0.000233782	0.0308269	-0.00047405	0.0129778	-8.71673e-05	0.0257433	0.000347033	0.0412864
2018-06-19T19:24:00	0.0263743	-0.000660209	0.0326972	-8.96611e-05	0.0391285	-0.00333061	0.0362616	-0.000120682	0.0100222	-0.000238096	0.030686	6.94385e-05	0.0319304	0.00063749	0.0255771	0.000124942	0.0374458	0.000201529	0.0324581	-0.000331213	-0.0185285	-0.000111347	0.0338436	0.000747596	0.0254437	-0.00167739	0.00863105	3.41372e-05	0.0160057	-0.000114167	0.0199741	5.34871e-05	0.0125058	0.000229396	0.0102228	7.13322e-05	0.0175538	-0.000404688	0.0320089	0.000156698	0.0258326	0.000226623	0.0294211	-0.000452432	0.0135254	-9.08453e-05	0.0250091	0.000337135	0.0408384
2018-06-19T19:27:00	0.0243952	-0.000610668	0.0308736	-8.46605e-05	0.0381542	-0.00324767	0.0347987	-0.000115814	0.00702959	-0.000167001	0.0287105	6.49683e-05	0.0306415	0.000611756	0.0281813	0.000137664	0.0364798	0.00019633	0.030976	-0.000316089	-0.015746	-9.4626e-05	0.0320355	0.000707656	0.0255118	-0.00168188	0.0099493	3.93511e-05	0.0123658	-8.82046e-05	0.0209451	5.6087e-05	0.0131197	0.000240656	0.00868682	6.06143e-05	0.0158933	-0.000366407	0.0317317	0.000155342	0.0249483	0.000218865	0.0280109	-0.000430747	0.0143894	-9.66488e-05	0.0241595	0.000325683	0.0400729
2018-06-19T19:30:00	0.0227897	-0.000570478	0.0303453	-8.32118e-05	0.0361147	-0.00307407	0.0341906	-0.00011379	0.00123874	-2.94284e-05	0.0270022	6.11025e-05	0.030475	0.000608433	0.0275914	0.000134782	0.0359009	0.000193214	0.0303836	-0.000310044	-0.0133414	-8.01751e-05	0.031526	0.000696401	0.0255516	-0.0016845	0.0110057	4.35294e-05	0.0119523	-8.52548e-05	0.0210391	5.63389e-05	0.0154541	0.000283476	0.00729407	5.08961e-05	0.0149048	-0.000343619	0.0310499	0.000152004	0.0253108	0.000222045	0.0265994	-0.000409041	0.0146966	-9.87119e-05	0.0228463	0.00030798	0.0407358
2018-06-19T19:33:00	0.0214395	-0.000536679	0.0308046	-8.44712e-05	0.0349987	-0.00297908	0.0320142	-0.000106547	-0.00211225	5.01803e-05	0.0256608	5.80672e-05	0.0306235	0.000611397	0.0281242	0.000137385	0.0349068	0.000187864	0.0289526	-0.000295442	-0.0116524	-7.00255e-05	0.030443	0.000672478	0.0249617	-0.00164561	0.0116077	4.59102e-05	0.0115578	-8.24408e-05	0.0213623	5.72044e-05	0.0164895	0.000302469	0.00632553	4.41378e-05	0.0141539	-0.000326306	0.0295719	0.000144768	0.0244848	0.000214799	0.0244606	-0.000376151	0.015862	-0.00010654	0.0208606	0.000281212	0.0411
2018-06-19T19:36:00	0.0203382	-0.000509111	0.0310007	-8.50091e-05	0.0331164	-0.00281886	0.0307299	-0.000102273	-0.00470884	0.000111867	0.0248327	5.61933e-05	0.0309416	0.000617747	0.0266401	0.000130135	0.0345996	0.000186211	0.0273468	-0.000279056	-0.00956088	-5.74562e-05	0.0298317	0.000658975	0.0246526	-0.00162523	0.0122085	4.82866e-05	0.010577	-7.5445e-05	0.0217904	5.83508e-05	0.0179098	0.00032852	0.00650425	4.53849e-05	0.0134708	-0.000310558	0.029086	0.00014239	0.0240791	0.00021124	0.0234906	-0.000361234	0.0172448	-0.000115827	0.0204239	0.000275325	0.0403652
2018-06-19T19:39:00	0.018895	-0.000472986	0.0301196	-8.25929e-05	0.0285184	-0.00242747	0.0289231	-9.62593e-05	-0.00702102	0.000166797	0.0234086	5.29708e-05	0.0309583	0.000618081	0.0264153	0.000129037	0.0338202	0.000182017	0.0252275	-0.00025743	-0.00878293	-5.27811e-05	0.0289275	0.000639001	0.0244127	-0.00160942	0.010252	4.05485e-05	0.00981907	-7.00388e-05	0.0224587	6.01402e-05	0.0191809	0.000351838	0.00663534	4.62996e-05	0.0114368	-0.000263667	0.0271164	0.000132748	0.0237257	0.000208139	0.0214924	-0.000330506	0.0171377	-0.000115108	0.0200029	0.00026965	0.0395375
2018-06-19T19:42:00	0.0181626	-0.00045465	0.0287391	-7.88072e-05	0.0266547	-0.00226884	0.0274546	-9.13717e-05	-0.00648651	0.000154099	0.0214044	4.84355e-05	0.0301379	0.000601702	0.0241115	0.000117783	0.0324067	0.000174409	0.0236561	-0.000241394	-0.00745251	-4.4786e-05	0.0285465	0.000630584	0.0239312	-0.00157768	0.00965404	3.81833e-05	0.00987188	-7.04156e-05	0.0216013	5.78442e-05	0.0192342	0.000352815	0.00600439	4.1897e-05	0.00910657	-0.000209945	0.0254534	0.000124607	0.0236544	0.000207514	0.0194262	-0.000298732	0.0182763	-0.000122756	0.020188	0.000272144	0.0393423
2018-06-19T19:45:00	0.0162266	-0.000406187	0.0278311	-7.63175e-05	0.0245137	-0.00208659	0.025785	-8.58152e-05	-0.00865098	0.00020552	0.0200406	4.53493e-05	0.0289497	0.00057798	0.0230086	0.000112395	0.0311875	0.000167848	0.0220698	-0.000225207	-0.00695982	-4.18251e-05	0.0291041	0.000642902	0.0234971	-0.00154906	0.00869925	3.44069e-05	0.00991796	-7.07443e-05	0.0205366	5.49934e-05	0.0180195	0.000330533	0.00576879	4.02531e-05	0.00822417	-0.000189602	0.0238965	0.000116985	0.0236737	0.000207683	0.0176666	-0.000271674	0.0186548	-0.000125298	0.0202766	0.000273338	0.0400009
2018-06-19T19:48:00	0.0140645	-0.000352065	0.0267337	-7.3308e-05	0.0220703	-0.00187862	0.0244719	-8.1445e-05	-0.00464335	0.000110311	0.0180103	4.07551e-05	0.0264424	0.000527921	0.0217693	0.000106341	0.029743	0.000160074	0.0210266	-0.000214562	-0.0061645	-3.70457e-05	0.0289747	0.000640044	0.0225523	-0.00148677	0.00734046	2.90327e-05	0.00968939	-6.91139e-05	0.0192087	5.14375e-05	0.0188507	0.00034578	0.00573565	4.00218e-05	0.00947828	-0.000218514	0.0215844	0.000105666	0.0233882	0.000205179	0.0158484	-0.000243714	0.018331	-0.000123123	0.0190163	0.00025635	0.0388712
2018-06-19T19:51:00	0.0127428	-0.000318981	0.0253715	-6.95727e-05	0.0188686	-0.00160608	0.0236086	-7.85721e-05	-0.00360536	8.5652e-05	0.0162606	3.67957e-05	0.0243907	0.00048696	0.0189663	9.26491e-05	0.0282259	0.000151909	0.01928	-0.00019674	-0.00638775	-3.83873e-05	0.0289298	0.000639051	0.0215302	-0.00141939	0.00533759	2.1111e-05	0.0105274	-7.50912e-05	0.0179226	4.79934e-05	0.018702	0.000343053	0.00575654	4.01676e-05	0.00804376	-0.000185443	0.0203145	9.9449e-05	0.0228625	0.000200567	0.0138085	-0.000212345	0.0175447	-0.000117842	0.0189188	0.000255035	0.0382762
2018-06-19T19:54:00	0.0120372	-0.00030132	0.0234899	-6.44131e-05	0.0154698	-0.00131678	0.0220215	-7.329e-05	0.000805057	-1.91256e-05	0.0131514	2.976e-05	0.0213918	0.000427087	0.01692	8.2653e-05	0.0258584	0.000139167	0.0183924	-0.000187682	-0.00712748	-4.28327e-05	0.0293572	0.000648493	0.0201783	-0.00133027	0.00295355	1.16818e-05	0.0115718	-8.25413e-05	0.0160417	4.29566e-05	0.0162028	0.00029721	0.00623588	4.35123e-05	0.00756518	-0.000174409	0.0182163	8.91775e-05	0.0216061	0.000189544	0.0115242	-0.000177217	0.0163821	-0.000110033	0.0178917	0.000241189	0.0374096
2018-06-19T19:57:00	0.0110526	-0.000276671	0.0221831	-6.08297e-05	0.0122815	-0.0010454	0.0212847	-7.08379e-05	0.00577094	-0.000137099	0.0113009	2.55724e-05	0.0194499	0.000388316	0.0132606	6.4777e-05	0.0243175	0.000130874	0.0174642	-0.00017821	-0.00841362	-5.05618e-05	0.0294402	0.000650326	0.0193481	-0.00127554	-0.000511592	-2.0234e-06	0.0131217	-9.35966e-05	0.0141135	3.77933e-05	0.0132204	0.000242504	0.00663963	4.63296e-05	0.00550992	-0.000127027	0.0164886	8.07194e-05	0.0196653	0.000172519	0.0097986	-0.000150681	0.0157564	-0.000105831	0.0178238	0.000240274	0.0359785
2018-06-19T20:00:00	0.0100422	-0.000251379	0.020919	-5.73634e-05	0.00767861	-0.000653601	0.0192331	-6.40097e-05	0.00836234	-0.000198663	0.00901462	2.0399e-05	0.0163352	0.000326132	0.0107594	5.25591e-05	0.0221284	0.000119092	0.0167602	-0.000171027	-0.0103866	-6.24186e-05	0.0292035	0.000645097	0.0171703	-0.00113196	-0.00411093	-1.62594e-05	0.0155136	-0.000110658	0.0113891	3.0498e-05	0.0121588	0.00022303	0.00626525	4.37173e-05	0.00442362	-0.000101983	0.0141396	6.92202e-05	0.0183216	0.000160731	0.007689	-0.00011824	0.0133639	-8.97606e-05	0.0176432	0.00023784	0.034836
2018-06-19T20:03:00	0.0094274	-0.000235989	0.0196911	-5.39962e-05	0.00562584	-0.000478869	0.0184374	-6.13615e-05	0.0156458	-0.000371694	0.00757214	1.71348e-05	0.0138975	0.000277462	0.00878727	4.29252e-05	0.0204567	0.000110096	0.0167701	-0.000171127	-0.0126275	-7.5885e-05	0.0299148	0.000660811	0.0157484	-0.00103822	-0.00649859	-2.5703e-05	0.0173023	-0.000123416	0.00846069	2.26562e-05	0.0104805	0.000192244	0.00561368	3.91708e-05	0.00150641	-3.47291e-05	0.0120764	5.91196e-05	0.0165645	0.000145316	0.00653872	-0.000100551	0.0124399	-8.35548e-05	0.0174256	0.000234906	0.0353092
2018-06-19T20:06:00	0.00895986	-0.000224285	0.0181484	-4.97658e-05	0.0021698	-0.000184693	0.0180249	-5.99888e-05	0.0208223	-0.000494673	0.00597233	1.35146e-05	0.0110907	0.000221425	0.00699588	3.41744e-05	0.0189891	0.000102197	0.0171388	-0.000174889	-0.0146165	-8.78378e-05	0.0295193	0.000652075	0.0144369	-0.000951762	-0.0080713	-3.19233e-05	0.0186115	-0.000132755	0.00588028	1.57463e-05	0.00835624	0.000153279	0.00469347	3.27498e-05	-0.00202218	4.66198e-05	0.0105401	5.15989e-05	0.0150368	0.000131914	0.00477866	-7.34854e-05	0.0120416	-8.08796e-05	0.0178957	0.000241243	0.034281
2018-06-19T20:09:00	0.00736763	-0.000184429	0.014912	-4.08912e-05	-0.00163727	0.000139364	0.0171775	-5.71686e-05	0.0282809	-0.000671866	0.00539798	1.22149e-05	0.0086746	0.000173188	0.00409413	1.99996e-05	0.016462	8.85965e-05	0.0182088	-0.000185808	-0.0161926	-9.73094e-05	0.0289967	0.000640531	0.0136358	-0.000898948	-0.0097627	-3.86131e-05	0.0197968	-0.000141209	0.00384214	1.02885e-05	0.00427429	7.84038e-05	0.00469201	3.27396e-05	-0.00281134	6.48132e-05	0.00901067	4.41115e-05	0.0132308	0.000116071	0.00280917	-4.31989e-05	0.0103485	-6.95074e-05	0.0189774	0.000255825	0.0326132
2018-06-19T20:12:00	0.00722705	-0.000180909	0.0127822	-3.50508e-05	-0.00388357	0.000330568	0.0166428	-5.53891e-05	0.0349863	-0.000831163	0.00421296	9.5334e-06	0.00653439	0.000130459	0.00193656	9.46e-06	0.0146926	7.90739e-05	0.0187405	-0.000191234	-0.0169832	-0.000102061	0.0286797	0.000633526	0.011981	-0.000789855	-0.0109601	-4.33491e-05	0.0206935	-0.000147606	0.00162468	4.3506e-06	0.00275048	5.04523e-05	0.00575688	4.017e-05	-0.00388826	8.96408e-05	0.00705197	3.45227e-05	0.0109101	9.57118e-05	0.00137422	-2.11325e-05	0.0102685	-6.89699e-05	0.0189846	0.000255921	0.0327535
2018-06-19T20:15:00	0.00728788	-0.000182432	0.0121297	-3.32617e-05	-0.00604799	0.000514802	0.0162486	-5.4077e-05	0.0417761	-0.000992467	0.00307485	6.958e-06	0.00441145	8.80745e-05	-0.000267585	-1.3071e-06	0.0136092	7.32433e-05	0.0199345	-0.000203418	-0.0178815	-0.000107459	0.0280285	0.000619142	0.0116213	-0.000766138	-0.0121961	-4.82377e-05	0.0213534	-0.000152313	-0.000237987	-6.373e-07	-0.000436695	-8.0103e-06	0.00584061	4.07542e-05	-0.00505743	0.000116595	0.00556231	2.72301e-05	0.00900634	7.90103e-05	8.99275e-05	-1.3829e-06	0.00910391	-6.1148e-05	0.0185878	0.000250573	0.0327274
2018-06-19T20:18:00	0.00733828	-0.000183694	0.0116842	-3.20401e-05	-0.00831138	0.000707461	0.0150032	-4.99324e-05	0.0488424	-0.00116034	0.00103915	2.3515e-06	0.0031562	6.30135e-05	-0.002002	-9.7796e-06	0.012021	6.46956e-05	0.0203631	-0.000207792	-0.0198445	-0.000119256	0.0283214	0.000625613	0.0102981	-0.000678905	-0.0145311	-5.7473e-05	0.0227009	-0.000161924	-0.00181334	-4.8558e-06	-0.00254068	-4.6604e-05	0.0056461	3.9397e-05	-0.00646666	0.000149084	0.00394619	1.93185e-05	0.00734768	6.44593e-05	-3.76573e-05	5.791e-07	0.00833398	-5.59766e-05	0.0174757	0.000235581	0.0321002
2018-06-19T20:21:00	0.00699374	-0.000175069	0.0107918	-2.9593e-05	-0.00960792	0.000817822	0.0154143	-5.13006e-05	0.056682	-0.00134659	2.25239e-05	5.1e-08	0.00262108	5.23298e-05	-0.00377202	-1.84261e-05	0.0117541	6.3259e-05	0.0215779	-0.000220188	-0.0204246	-0.000122742	0.028165	0.000622157	0.00974965	-0.000642751	-0.015536	-6.14474e-05	0.0232861	-0.000166098	-0.00301756	-8.0805e-06	-0.00354278	-6.49856e-05	0.00546251	3.8116e-05	-0.00842811	0.000194303	0.00322638	1.57946e-05	0.00561212	4.92337e-05	-0.000864805	1.32988e-05	0.00798209	-5.36131e-05	0.0168649	0.000227348	0.0315816
2018-06-19T20:24:00	0.00697021	-0.00017448	0.00939929	-2.57744e-05	-0.0111708	0.00095085	0.015714	-5.22978e-05	0.0630655	-0.00149824	0.000459066	1.0388e-06	0.00141444	2.82391e-05	-0.00611582	-2.98754e-05	0.0113224	6.09361e-05	0.0228718	-0.000233391	-0.0213671	-0.000128406	0.0275106	0.000607701	0.00909445	-0.000599556	-0.0171123	-6.76819e-05	0.0243699	-0.000173829	-0.00434566	-1.16369e-05	-0.00408551	-7.49409e-05	0.00644193	4.49501e-05	-0.00934632	0.000215472	0.00295736	1.44777e-05	0.00461327	4.04711e-05	-0.00111696	1.71764e-05	0.0075328	-5.05953e-05	0.0151451	0.000204163	0.0311197
2018-06-19T20:27:00	0.00627602	-0.000157103	0.0078668	-2.1572e-05	-0.0120552	0.00102613	0.0158892	-5.28811e-05	0.0691402	-0.00164255	-0.000522063	-1.1814e-06	-0.0011643	-2.32453e-05	-0.00783324	-3.82649e-05	0.0109015	5.86706e-05	0.0236537	-0.00024137	-0.021227	-0.000127564	0.0275942	0.000609549	0.00982783	-0.000647905	-0.0164848	-6.52002e-05	0.0248715	-0.000177407	-0.00572916	-1.53417e-05	-0.00383208	-7.02922e-05	0.00771746	5.38503e-05	-0.00650764	0.000150028	0.00189719	9.2877e-06	0.00379376	3.32817e-05	-0.00223547	3.43767e-05	0.00708309	-4.75748e-05	0.015836	0.000213477	0.0323513
2018-06-19T20:30:00	0.0050406	-0.000126178	0.00726747	-1.99286e-05	-0.012202	0.00103863	0.0163161	-5.43017e-05	0.0765428	-0.00181841	-0.000674855	-1.5271e-06	-0.00187752	-3.74846e-05	-0.00886741	-4.33167e-05	0.0099459	5.35277e-05	0.0240951	-0.000245874	-0.0197787	-0.00011886	0.0267612	0.000591149	0.010674	-0.000703687	-0.0147961	-5.85209e-05	0.0248273	-0.000177092	-0.00614013	-1.64421e-05	-0.00339013	-6.21855e-05	0.00868172	6.05787e-05	-0.0057875	0.000133426	0.00195748	9.5828e-06	0.00305929	2.68384e-05	-0.00300507	4.62114e-05	0.00708101	-4.75608e-05	0.0164473	0.000221717	0.0328812
2018-06-19T20:33:00	0.00500509	-0.000125289	0.00656	-1.79886e-05	-0.0120256	0.00102361	0.0168409	-5.60483e-05	0.084655	-0.00201114	-0.000618458	-1.3995e-06	-0.0021076	-4.20781e-05	-0.00972988	-4.75298e-05	0.00931263	5.01195e-05	0.0256439	-0.000261679	-0.0183466	-0.000110254	0.0257117	0.000567965	0.011548	-0.00076131	-0.0119116	-4.71122e-05	0.0251637	-0.000179491	-0.0070168	-1.87897e-05	-0.0022162	-4.0652e-05	0.00912684	6.36847e-05	-0.00200777	4.62875e-05	0.00200752	9.8278e-06	0.00288533	2.53123e-05	-0.00314164	4.83116e-05	0.00740077	-4.97086e-05	0.0160068	0.00021578	0.0322386
2018-06-19T20:36:00	0.00486915	-0.000121886	0.00709764	-1.94629e-05	-0.0121063	0.00103048	0.0173098	-5.7609e-05	0.0915621	-0.00217523	-0.000802971	-1.817e-06	-0.00136603	-2.72727e-05	-0.0105049	-5.13159e-05	0.00849945	4.57431e-05	0.026344	-0.000268823	-0.0184713	-0.000111003	0.0255856	0.00056518	0.0119553	-0.000788161	-0.0110997	-4.39012e-05	0.0259939	-0.000185413	-0.00635279	-1.70116e-05	-0.00166761	-3.05892e-05	0.009756	6.80748e-05	-0.0013382	3.08513e-05	0.0019146	9.3729e-06	0.00250828	2.20045e-05	-0.00200423	3.08208e-05	0.00798022	-5.36005e-05	0.015859	0.000213788	0.0309969
2018-06-19T20:39:00	0.00555906	-0.000139156	0.00741359	-2.03293e-05	-0.0119827	0.00101997	0.0179522	-5.9747e-05	0.0987975	-0.00234712	-2.80984e-05	-6.36e-08	-0.00131531	-2.62602e-05	-0.00905057	-4.42115e-05	0.00840725	4.52469e-05	0.0268359	-0.000273843	-0.0176175	-0.000105872	0.025479	0.000562824	0.0124925	-0.000823574	-0.0107562	-4.25426e-05	0.0257194	-0.000183455	-0.00572311	-1.53254e-05	-0.00151265	-2.77467e-05	0.0107364	7.49157e-05	0.00196919	-4.53982e-05	0.00176242	8.6279e-06	0.00189788	1.66496e-05	-0.00147497	2.26818e-05	0.00789057	-5.29984e-05	0.0150702	0.000203154	0.0305435
2018-06-19T20:42:00	0.00580585	-0.000145333	0.00823656	-2.2586e-05	-0.0115689	0.000984736	0.0185973	-6.18937e-05	0.103454	-0.00245774	0.00121816	2.7565e-06	-0.000273652	-5.4635e-06	-0.00849758	-4.15101e-05	0.00842995	4.53691e-05	0.0272926	-0.000278502	-0.0181206	-0.000108896	0.0254271	0.000561678	0.0130385	-0.000859572	-0.00921326	-3.64399e-05	0.0252216	-0.000179904	-0.00556886	-1.49124e-05	-0.000516501	-9.4742e-06	0.0121511	8.47871e-05	0.00556025	-0.000128187	0.00168786	8.2629e-06	0.00147902	1.29751e-05	-0.000478432	7.3572e-06	0.00759313	-5.10006e-05	0.014992	0.0002021	0.029289
2018-06-19T20:45:00	0.00618237	-0.000154759	0.00885867	-2.42919e-05	-0.0115004	0.000978906	0.018732	-6.23422e-05	0.108699	-0.00258235	0.00186436	4.2188e-06	-0.000455807	-9.1002e-06	-0.00790946	-3.86372e-05	0.00855613	4.60482e-05	0.0272269	-0.000277832	-0.0186991	-0.000112372	0.0254619	0.000562447	0.0136	-0.000896585	-0.00849726	-3.36081e-05	0.0250286	-0.000178528	-0.00427072	-1.14362e-05	-5.86422e-05	-1.0757e-06	0.0125043	8.72517e-05	0.0088626	-0.00020432	0.00190866	9.3438e-06	0.00101421	8.8974e-06	0.000466118	-7.1679e-06	0.00665938	-4.47288e-05	0.0138284	0.000186413	0.0287237
2018-06-19T20:48:00	0.149916	-0.00375274	0.149251	-0.000409271	0.130523	-0.0111101	0.162951	-0.000542318	0.254352	-0.00604259	0.0861258	0.000194892	0.14443	0.00288355	0.131506	0.000642399	0.154395	0.000830935	0.165166	-0.0016854	0.121708	0.000731409	0.16299	0.0036004	0.159064	-0.0104864	0.130636	0.000516686	0.165169	-0.00117814	0.139647	0.000373948	0.14313	0.00262545	0.156321	0.00109076	0.15028	-0.00346458	0.149151	0.000730164	0.151885	0.00133245	0.142706	-0.00219451	0.15221	-0.00102235	0.155055	0.00209023	0.163245
2018-06-19T20:51:00	0.22376	-0.00560122	0.225802	-0.000619187	0.230367	-0.0196088	0.249452	-0.000830204	0.335366	-0.00796723	0.159615	0.000361189	0.231449	0.00462087	0.201428	0.00098396	0.242589	0.00130559	0.230286	-0.00234991	0.198721	0.00119422	0.24915	0.00550365	0.208273	-0.0137305	0.201242	0.000795945	0.218664	-0.00155972	0.196309	0.000525679	0.220329	0.00404151	0.232392	0.00162157	0.213518	-0.0049225	0.229296	0.00112251	0.20837	0.00182798	0.21872	-0.00336343	0.232176	-0.00155945	0.225098	0.00303443	0.238601
2018-06-19T20:54:00	0.253553	-0.00634702	0.259681	-0.000712088	0.276293	-0.0235179	0.291235	-0.00096926	0.374115	-0.00888779	0.202092	0.000457308	0.263537	0.00526151	0.230952	0.00112819	0.280638	0.00151036	0.258502	-0.00263783	0.225271	0.00135377	0.289556	0.00639622	0.224918	-0.0148279	0.225887	0.000893421	0.23238	-0.00165756	0.220099	0.000589386	0.253319	0.00464665	0.257545	0.00179708	0.230455	-0.00531295	0.257295	0.00125958	0.225203	0.00197564	0.252799	-0.0038875	0.262198	-0.0017611	0.248481	0.00334965	0.272252
2018-06-19T20:57:00	0.261794	-0.00655331	0.270164	-0.000740833	0.294631	-0.0250788	0.307102	-0.00102207	0.38849	-0.00922928	0.222573	0.000503656	0.271316	0.00541682	0.239955	0.00117216	0.292719	0.00157538	0.264777	-0.00270187	0.229507	0.00137922	0.304952	0.00673631	0.226515	-0.0149332	0.231882	0.00091713	0.230183	-0.00164188	0.22532	0.000603364	0.263574	0.00483476	0.258855	0.00180622	0.232879	-0.00536884	0.262707	0.00128608	0.22447	0.00196922	0.263219	-0.00404774	0.270274	-0.00181534	0.252266	0.00340067	0.28301
2018-06-19T21:00:00	0.251653	-0.00629944	0.261459	-0.000716963	0.290114	-0.0246944	0.301322	-0.00100283	0.380109	-0.0090302	0.224757	0.000508596	0.258447	0.00515989	0.23242	0.00113535	0.285224	0.00153505	0.252889	-0.00258056	0.215379	0.00129432	0.298587	0.0065957	0.213587	-0.0140808	0.221669	0.000876736	0.213562	-0.00152332	0.215026	0.000575799	0.253624	0.00465225	0.242229	0.00169021	0.218236	-0.00503125	0.250238	0.00122503	0.209028	0.00183375	0.254311	-0.00391076	0.259499	-0.00174297	0.240269	0.00323895	0.273903
2018-06-19T21:03:00	0.225552	-0.00564609	0.237427	-0.000651063	0.263792	-0.0224539	0.276232	-0.00091933	0.353534	-0.00839884	0.210225	0.000475713	0.229665	0.00458525	0.209008	0.00102099	0.258767	0.00139266	0.224961	-0.00229557	0.186622	0.00112151	0.273348	0.00603818	0.188019	-0.0123953	0.196658	0.000777814	0.184806	-0.00131821	0.189942	0.000508631	0.227516	0.00417336	0.210586	0.00146941	0.192526	-0.00443854	0.222416	0.00108883	0.181559	0.00159277	0.22887	-0.00351952	0.231234	-0.00155312	0.213302	0.00287542	0.24875
2018-06-19T21:06:00	0.185624	-0.0046466	0.198806	-0.000545157	0.222798	-0.0189645	0.233983	-0.000778721	0.309705	-0.00735762	0.182654	0.000413323	0.186188	0.00371724	0.173003	0.000845107	0.216198	0.00116355	0.184483	-0.00188252	0.14506	0.000871741	0.232882	0.0051443	0.152443	-0.0100499	0.159138	0.000629418	0.14585	-0.00104034	0.152579	0.00040858	0.188566	0.00345889	0.166026	0.00115849	0.158707	-0.00365887	0.181667	0.000889344	0.142486	0.00124999	0.189801	-0.00291872	0.189428	-0.00127233	0.174381	0.00235075	0.20928
2018-06-19T21:09:00	0.134504	-0.00336695	0.147538	-0.000404573	0.166514	-0.0141736	0.178285	-0.000593351	0.25092	-0.00596106	0.144142	0.000326176	0.130926	0.00261393	0.125711	0.000614088	0.160324	0.000862846	0.132688	-0.00135399	0.0943527	0.000567014	0.177959	0.00393107	0.108474	-0.00715118	0.111623	0.000441487	0.0976416	-0.000696472	0.105728	0.000283121	0.135817	0.00249131	0.110776	0.000772964	0.116366	-0.00268272	0.129608	0.000634492	0.0939425	0.000824133	0.139189	-0.00214043	0.134996	-0.000906724	0.124472	0.00167794	0.158165
2018-06-19T21:12:00	0.0733099	-0.00183511	0.0854015	-0.000234185	0.0982145	-0.00835998	0.109781	-0.000365363	0.180078	-0.00427808	0.0944165	0.000213653	0.0661781	0.00132124	0.0671703	0.000328122	0.0927172	0.000498994	0.071547	-0.000730089	0.0356772	0.000214402	0.11123	0.00245703	0.0561142	-0.00369936	0.0554876	0.000219462	0.0443887	-0.000316622	0.051682	0.000138395	0.0745975	0.00136835	0.0472115	0.000329429	0.0650362	-0.00149936	0.0662797	0.00032447	0.0378459	0.000332013	0.0762621	-0.00117275	0.0705968	-0.000474175	0.0661786	0.000892121	0.0966336
2018-06-19T21:15:00	0.00399724	-0.00010006	0.015199	-4.16782e-05	0.0182295	-0.00155169	0.0310272	-0.000103262	0.100072	-0.0023774	0.0356807	8.0741e-05	-0.00629012	-0.000125582	0.00237578	1.16055e-05	0.0144798	7.79289e-05	0.00330056	-3.368e-05	-0.030513	-0.000183368	0.0346995	0.000766503	-0.00162856	0.000107364	-0.00784068	-3.10112e-05	-0.0156889	0.000111908	-0.00989721	-2.65029e-05	0.00633194	0.000116147	-0.0231358	-0.000161436	0.00745937	-0.00017197	-0.00456717	-2.23584e-05	-0.0250104	-0.00021941	0.00567386	-8.72516e-05	-0.00220223	1.47916e-05	0.000436373	5.8825e-06	0.0275645
2018-06-19T21:18:00	-0.0713179	0.00178525	-0.0618798	0.000169684	-0.0710213	0.0060453	-0.0568946	0.000189351	0.00997057	-0.000236869	-0.0295917	-6.69623e-05	-0.0848024	-0.00169308	-0.0698397	-0.000341162	-0.0708776	-0.000381455	-0.0709584	0.000724083	-0.102028	-0.000613138	-0.0501417	-0.00110762	-0.0639992	0.00421918	-0.0778527	-0.00030792	-0.0798489	0.000569558	-0.0765008	-0.000204855	-0.069938	-0.00128288	-0.0990077	-0.00069085	-0.0586529	0.0013522	-0.0825724	-0.000404231	-0.0919092	-0.000806296	-0.0725389	0.00111549	-0.0819579	0.000550484	-0.0726122	-0.00097885	-0.0503095
2018-06-19T21:21:00	-0.151953	0.00380374	-0.144386	0.000395931	-0.165266	0.0140674	-0.150981	0.000502479	-0.0868701	0.00206376	-0.100687	-0.000227843	-0.168597	-0.00336604	-0.147951	-0.000722731	-0.162759	-0.000875951	-0.149379	0.00152431	-0.178148	-0.00107058	-0.140536	-0.00310439	-0.130838	0.00862553	-0.154345	-0.00061046	-0.147316	0.0010508	-0.148034	-0.000396409	-0.151544	-0.00277979	-0.17863	-0.00124643	-0.128844	0.00297039	-0.165649	-0.000810928	-0.163115	-0.00143097	-0.155981	0.00239864	-0.166292	0.00111693	-0.149	-0.0020086	-0.133411
2018-06-19T21:24:00	-0.236651	0.00592392	-0.23022	0.000631301	-0.265811	0.0226257	-0.24894	0.000828498	-0.188828	0.00448595	-0.176867	-0.000400227	-0.256458	-0.00512018	-0.227528	-0.00111146	-0.258153	-0.00138935	-0.230545	0.00235256	-0.256969	-0.00154426	-0.235631	-0.00520503	-0.200303	0.0132051	-0.233059	-0.000921787	-0.21734	0.00155027	-0.223104	-0.000597432	-0.236833	-0.00434426	-0.259705	-0.00181215	-0.196216	0.00452361	-0.251514	-0.00123128	-0.23662	-0.0020758	-0.244209	0.0037554	-0.253582	0.00170323	-0.228132	-0.00307533	-0.220192
2018-06-19T21:27:00	-0.32368	0.00810243	-0.320937	0.000880061	-0.36898	0.0314075	-0.34977	0.00116407	-0.293272	0.00696722	-0.255647	-0.000578497	-0.345755	-0.00690298	-0.311401	-0.00152117	-0.356625	-0.00191931	-0.312302	0.00318683	-0.338133	-0.00203202	-0.333951	-0.00737688	-0.271119	0.0178737	-0.313506	-0.00123997	-0.287992	0.00205423	-0.30062	-0.000805006	-0.323595	-0.00593574	-0.342507	-0.00238992	-0.271882	0.00626803	-0.339132	-0.00166021	-0.311202	-0.00273009	-0.333409	0.00512711	-0.342509	0.00230052	-0.308694	-0.00416136	-0.309499
2018-06-19T21:30:00	-0.411849	0.0103095	-0.413248	0.00113319	-0.47314	0.0402735	-0.453046	0.00150779	-0.399944	0.00950141	-0.335452	-0.000759087	-0.435941	-0.00870354	-0.396131	-0.00193507	-0.456447	-0.00245655	-0.394162	0.00402216	-0.417363	-0.00250815	-0.434445	-0.00959678	-0.342454	0.0225764	-0.394263	-0.00155938	-0.359355	0.00256326	-0.377369	-0.00101053	-0.414331	-0.00760011	-0.422313	-0.00294679	-0.344005	0.00793076	-0.428147	-0.00209598	-0.385022	-0.0033777	-0.424102	0.00652176	-0.432575	0.00290546	-0.391455	-0.00527701	-0.400477
2018-06-19T21:33:00	-0.499939	0.0125146	-0.505788	0.00138695	-0.579456	0.0493231	-0.556805	0.00185311	-0.506978	0.0120442	-0.416477	-0.000942434	-0.526074	-0.010503	-0.48086	-0.00234897	-0.556239	-0.00299361	-0.475453	0.00485168	-0.496141	-0.00298156	-0.534665	-0.0118106	-0.412907	0.0272211	-0.474061	-0.00187499	-0.429414	0.00306298	-0.453777	-0.00121513	-0.50362	-0.00923795	-0.501415	-0.00349874	-0.41613	0.00959354	-0.516518	-0.0025286	-0.457736	-0.0040156	-0.515642	0.00792946	-0.522322	0.00350826	-0.474186	-0.00639227	-0.491007
2018-06-19T21:36:00	-0.586247	0.0146751	-0.597061	0.00163724	-0.683431	0.0581733	-0.658501	0.00219156	-0.612173	0.0145433	-0.495585	-0.00112145	-0.613778	-0.0122541	-0.562923	-0.00274984	-0.655044	-0.00352537	-0.554409	0.00565737	-0.573831	-0.00344844	-0.633127	-0.0139856	-0.482133	0.0317849	-0.553834	-0.0021905	-0.498	0.00355221	-0.527931	-0.0014137	-0.591601	-0.0108518	-0.577486	-0.00402954	-0.488885	0.0112709	-0.603477	-0.0029543	-0.528762	-0.00463869	-0.604616	0.00929768	-0.61007	0.00409764	-0.55419	-0.00747076	-0.580461
2018-06-19T21:39:00	-0.669991	0.0167714	-0.685954	0.001881	-0.78589	0.0668947	-0.75785	0.00252221	-0.715566	0.0169996	-0.574435	-0.00129987	-0.698544	-0.0139464	-0.644832	-0.00314996	-0.751219	-0.00404298	-0.630508	0.0064339	-0.648669	-0.00389818	-0.729654	-0.0161179	-0.549491	0.0362255	-0.631043	-0.00249588	-0.56345	0.00401906	-0.600596	-0.00160829	-0.676531	-0.0124097	-0.648519	-0.0045252	-0.557397	0.0128503	-0.688443	-0.00337026	-0.596757	-0.00523519	-0.693015	0.0106571	-0.69523	0.00466963	-0.632801	-0.00853048	-0.668102
2018-06-19T21:42:00	-0.749723	0.0187673	-0.772151	0.00211736	-0.884237	0.0752659	-0.853768	0.00284143	-0.815564	0.0193752	-0.65048	-0.00147196	-0.779472	-0.0155621	-0.722734	-0.00353051	-0.843048	-0.00453719	-0.701971	0.00716314	-0.720651	-0.00433076	-0.822792	-0.0181753	-0.613368	0.0404366	-0.705061	-0.00278863	-0.625562	0.0044621	-0.670074	-0.00179434	-0.758264	-0.0139089	-0.716065	-0.00499651	-0.622895	0.0143604	-0.769943	-0.00376923	-0.662244	-0.0058097	-0.777653	0.0119586	-0.776736	0.00521708	-0.707648	-0.00953945	-0.752501
2018-06-19T21:45:00	-0.826474	0.0206885	-0.852561	0.00233786	-0.977488	0.0832034	-0.944311	0.00314277	-0.910218	0.0216239	-0.72376	-0.00163778	-0.85687	-0.0171074	-0.79661	-0.00389139	-0.929925	-0.00500475	-0.768128	0.00783822	-0.789026	-0.00474166	-0.911379	-0.0201321	-0.673996	0.0444335	-0.776355	-0.00307061	-0.683993	0.00487888	-0.736111	-0.00197117	-0.835162	-0.0153195	-0.778898	-0.00543494	-0.683353	0.0157542	-0.846946	-0.0041462	-0.72293	-0.00634208	-0.856785	0.0131755	-0.8532	0.00573066	-0.777563	-0.0104819	-0.832625
2018-06-19T21:48:00	-0.898405	0.0224891	-0.928296	0.00254554	-1.06444	0.0906051	-1.02975	0.00342711	-0.999396	0.0237425	-0.791827	-0.00179181	-0.929208	-0.0185516	-0.865066	-0.00422579	-1.01058	-0.00543885	-0.828671	0.00845603	-0.851648	-0.00511799	-0.994204	-0.0219617	-0.730421	0.0481534	-0.841945	-0.00333003	-0.738413	0.00526706	-0.797325	-0.00213509	-0.906795	-0.0166334	-0.836637	-0.00583783	-0.736077	0.0169697	-0.918632	-0.00449714	-0.779329	-0.00683685	-0.931738	0.0143281	-0.924157	0.00620726	-0.841647	-0.0113458	-0.906787
2018-06-19T21:51:00	-0.964301	0.0241386	-0.998573	0.00273825	-1.14466	0.0974328	-1.10853	0.0036893	-1.08217	0.025709	-0.85467	-0.00193401	-0.995382	-0.0198728	-0.927379	-0.00453018	-1.08501	-0.00583943	-0.882591	0.00900624	-0.908284	-0.00545834	-1.07044	-0.0236457	-0.781883	0.051546	-0.900962	-0.00356345	-0.787428	0.00561668	-0.853446	-0.00228537	-0.973059	-0.0178489	-0.886889	-0.00618848	-0.789887	0.0182102	-0.98448	-0.00481949	-0.829188	-0.00727425	-0.999629	0.0153721	-0.988923	0.00664227	-0.90026	-0.012136	-0.974957
2018-06-19T21:54:00	-1.02387	0.0256298	-1.06307	0.00291511	-1.21716	0.103604	-1.18017	0.00392774	-1.15785	0.0275067	-0.911575	-0.00206278	-1.05525	-0.0210679	-0.983614	-0.00480489	-1.15267	-0.00620353	-0.929936	0.00948937	-0.958988	-0.00576305	-1.13944	-0.0251699	-0.829164	0.0546631	-0.954617	-0.00377567	-0.831246	0.00592923	-0.903048	-0.0024182	-1.03382	-0.0189636	-0.931333	-0.00649859	-0.836426	0.0192831	-1.04318	-0.00510684	-0.87366	-0.00766439	-1.06121	0.0163191	-1.04635	0.00702801	-0.952798	-0.0128442	-1.03584
2018-06-19T21:57:00	-1.07648	0.0269468	-1.12006	0.00307138	-1.2815	0.109081	-1.24366	0.00413904	-1.22519	0.0291067	-0.963522	-0.00218033	-1.10713	-0.0221037	-1.03321	-0.00504715	-1.21169	-0.00652118	-0.970517	0.00990347	-1.0024	-0.00602392	-1.20176	-0.0265465	-0.870279	0.0573736	-1.00284	-0.00396639	-0.869264	0.00620041	-0.94708	-0.00253611	-1.08698	-0.0199386	-0.968026	-0.00675462	-0.878217	0.0202466	-1.09519	-0.00536146	-0.912356	-0.00800387	-1.11588	0.0171599	-1.09626	0.00736321	-0.99904	-0.0134676	-1.09092
2018-06-19T22:00:00	-1.12054	0.0280497	-1.16931	0.00320644	-1.33737	0.113836	-1.29889	0.00432285	-1.28447	0.0305149	-1.00831	-0.00228168	-1.15131	-0.0229858	-1.07587	-0.00525556	-1.26192	-0.0067915	-1.00328	0.0102378	-1.03984	-0.00624893	-1.25443	-0.0277099	-0.905672	0.0597069	-1.04339	-0.00412677	-0.901579	0.00643091	-0.984237	-0.00263561	-1.13441	-0.0208086	-0.99627	-0.0069517	-0.912173	0.0210294	-1.13994	-0.00558056	-0.944504	-0.00828589	-1.16371	0.0178954	-1.13881	0.00764901	-1.03908	-0.0140074	-1.13903
2018-06-19T22:03:00	-1.15687	0.0289591	-1.20982	0.00331753	-1.38429	0.11783	-1.34424	0.00447377	-1.33401	0.0316918	-1.04565	-0.00236618	-1.18746	-0.0237076	-1.11129	-0.00542859	-1.30393	-0.00701758	-1.02901	0.0105003	-1.07052	-0.00643333	-1.29874	-0.0286889	-0.934386	0.0615999	-1.07684	-0.00425907	-0.926603	0.0066094	-1.01478	-0.00271739	-1.17129	-0.0214851	-1.01749	-0.0070998	-0.937423	0.0216115	-1.17723	-0.00576311	-0.969039	-0.00850113	-1.20367	0.0185098	-1.17372	0.00788349	-1.07165	-0.0144464	-1.17795
2018-06-19T22:06:00	-1.18544	0.0296742	-1.24242	0.00340692	-1.42218	0.121055	-1.38009	0.00459308	-1.37238	0.0326033	-1.07533	-0.00243333	-1.21542	-0.0242657	-1.13857	-0.00556186	-1.33654	-0.00719313	-1.04598	0.0106735	-1.09349	-0.00657136	-1.33324	-0.029451	-0.956912	0.0630849	-1.10372	-0.00436541	-0.944993	0.00674058	-1.03762	-0.00277857	-1.19973	-0.0220068	-1.02969	-0.00718487	-0.95597	0.0220391	-1.20567	-0.00590234	-0.987658	-0.00866447	-1.23483	0.0189889	-1.19984	0.00805894	-1.09665	-0.0147834	-1.20851
2018-06-19T22:09:00	-1.20526	0.0301704	-1.26537	0.00346984	-1.45043	0.12346	-1.40584	0.0046788	-1.4013	0.0332905	-1.09725	-0.00248295	-1.23432	-0.0246431	-1.15828	-0.00565811	-1.35872	-0.00731247	-1.0554	0.0107697	-1.11061	-0.00667424	-1.35881	-0.0300157	-0.97167	0.0640578	-1.12302	-0.00444172	-0.956056	0.00681949	-1.0535	-0.00282107	-1.21873	-0.0223552	-1.03486	-0.00722097	-0.970708	0.0223789	-1.22545	-0.00599914	-0.998132	-0.00875636	-1.2559	0.019313	-1.2169	0.00817353	-1.11194	-0.0149895	-1.22995
2018-06-19T22:12:00	-1.217	0.0304643	-1.27953	0.00350868	-1.46803	0.124958	-1.42094	0.00472906	-1.41904	0.0337119	-1.11357	-0.00251988	-1.24575	-0.0248713	-1.16884	-0.00570972	-1.37103	-0.00737873	-1.05726	0.0107886	-1.11795	-0.00671836	-1.37441	-0.0303604	-0.980502	0.0646401	-1.13364	-0.00448373	-0.960355	0.00685016	-1.06144	-0.00284234	-1.22945	-0.022552	-1.031	-0.00719405	-0.977457	0.0225345	-1.23445	-0.00604321	-1.00127	-0.00878386	-1.26796	0.0194984	-1.22457	0.00822506	-1.12038	-0.0151033	-1.24343
2018-06-19T22:15:00	-1.21943	0.0305252	-1.28475	0.003523	-1.47486	0.125539	-1.42655	0.00474771	-1.42535	0.0338618	-1.1209	-0.00253645	-1.24739	-0.0249042	-1.17093	-0.00571994	-1.37499	-0.00740003	-1.05068	0.0107215	-1.11646	-0.00670937	-1.38007	-0.0304854	-0.981366	0.064697	-1.13575	-0.00449206	-0.956657	0.00682378	-1.06197	-0.00284376	-1.23139	-0.0225876	-1.01955	-0.00711417	-0.976653	0.022516	-1.23646	-0.00605305	-0.997564	-0.00875138	-1.27153	0.0195534	-1.22348	0.00821772	-1.12067	-0.0151072	-1.24666
2018-06-19T22:18:00	-1.21268	0.0303561	-1.28042	0.0035111	-1.47206	0.125301	-1.42169	0.00473155	-1.42001	0.0337349	-1.11972	-0.0025338	-1.23935	-0.0247436	-1.16629	-0.00569727	-1.36797	-0.00736229	-1.03668	0.0105786	-1.10854	-0.00666178	-1.37585	-0.0303921	-0.975855	0.0643338	-1.12981	-0.00446859	-0.94832	0.00676431	-1.05483	-0.00282465	-1.22484	-0.0224673	-0.999709	-0.0069757	-0.967714	0.0223099	-1.2298	-0.00602045	-0.986887	-0.0086577	-1.26606	0.0194692	-1.21364	0.00815159	-1.1124	-0.0149957	-1.24125
2018-06-19T22:21:00	-1.19806	0.0299902	-1.26641	0.0034727	-1.46058	0.124324	-1.4071	0.00468298	-1.40273	0.0333243	-1.11104	-0.00251413	-1.22301	-0.0244173	-1.15179	-0.00562643	-1.3511	-0.00727148	-1.01514	0.0103588	-1.0934	-0.00657078	-1.36162	-0.0300779	-0.962169	0.0634315	-1.11523	-0.0044109	-0.932304	0.00665007	-1.03998	-0.00278489	-1.21094	-0.0222124	-0.972732	-0.00678746	-0.951653	0.0219396	-1.21426	-0.00594435	-0.969266	-0.00850312	-1.25287	0.0192664	-1.19558	0.00803033	-1.096	-0.0147746	-1.22723
2018-06-19T22:24:00	-1.17386	0.0293844	-1.24468	0.0034131	-1.43727	0.12234	-1.3824	0.00460076	-1.3764	0.032699	-1.09383	-0.00247519	-1.19937	-0.0239454	-1.12953	-0.00551767	-1.32498	-0.00713091	-0.985942	0.0100609	-1.07088	-0.00643546	-1.33716	-0.0295375	-0.942378	0.0621268	-1.0948	-0.00433011	-0.911367	0.00650072	-1.01776	-0.00272537	-1.18921	-0.0218137	-0.936386	-0.00653385	-0.930952	0.0214624	-1.19031	-0.00582713	-0.944487	-0.00828574	-1.22946	0.0189064	-1.16922	0.00785326	-1.07375	-0.0144747	-1.20516
2018-06-19T22:27:00	-1.14085	0.0285581	-1.21368	0.00332809	-1.40361	0.119475	-1.34648	0.00448124	-1.34103	0.0318586	-1.06809	-0.00241696	-1.16546	-0.0232683	-1.10046	-0.00537569	-1.28891	-0.00693678	-0.949317	0.00968714	-1.04057	-0.00625331	-1.30347	-0.0287933	-0.915475	0.0603532	-1.06553	-0.00421434	-0.884318	0.00630779	-0.989482	-0.00264965	-1.15759	-0.0212338	-0.892486	-0.00622753	-0.900282	0.0207553	-1.15696	-0.00566388	-0.912247	-0.0080029	-1.19666	0.018402	-1.13334	0.00761225	-1.0416	-0.0140413	-1.1731
2018-06-19T22:30:00	-1.10044	0.0275465	-1.17416	0.00321973	-1.35936	0.115708	-1.30109	0.00433016	-1.29711	0.0308152	-1.03614	-0.00234466	-1.12444	-0.0224495	-1.0621	-0.00518829	-1.24311	-0.00669027	-0.905185	0.00923681	-1.00107	-0.00601593	-1.26038	-0.0278416	-0.881855	0.0581367	-1.02742	-0.0040636	-0.851413	0.00607308	-0.954055	-0.00255478	-1.11816	-0.0205105	-0.844101	-0.00588991	-0.863469	0.0199066	-1.11473	-0.00545713	-0.875134	-0.00767732	-1.15557	0.0177701	-1.0894	0.00731717	-1.00234	-0.013512	-1.13335
2018-06-19T22:33:00	-0.991633	0.0248228	-1.068	0.00292862	-1.24177	0.105699	-1.19164	0.0039659	-1.20129	0.0285389	-0.960437	-0.00217335	-1.00377	-0.0200402	-0.958311	-0.00468129	-1.12097	-0.00603292	-0.791123	0.00807288	-0.87887	-0.00528158	-1.15212	-0.02545	-0.797558	0.0525795	-0.916282	-0.00362404	-0.743489	0.00530326	-0.862566	-0.00230979	-1.01058	-0.0185373	-0.698798	-0.00487602	-0.756246	0.0174347	-1.06501	-0.00521372	-0.830538	-0.00728609	-1.10598	0.0170076	-1.03768	0.00696974	-0.956431	-0.0128932	-1.08502
2018-06-19T22:36:00	-0.942353	0.0235892	-1.01846	0.00279279	-1.18386	0.100769	-1.13396	0.00377394	-1.14534	0.0272096	-0.914647	-0.00206973	-0.948634	-0.0189394	-0.911983	-0.00445498	-1.0625	-0.00571828	-0.726004	0.00740838	-0.832324	-0.00500186	-1.09979	-0.024294	-0.75705	0.0499089	-0.872644	-0.00345145	-0.705611	0.00503308	-0.818253	-0.00219113	-0.959027	-0.0175915	-0.627144	-0.00437604	-0.712514	0.0164264	-1.00803	-0.00493477	-0.780368	-0.00684597	-1.05004	0.0161473	-0.978186	0.00657015	-0.904337	-0.0121909	-1.02769
2018-06-19T22:39:00	-0.890572	0.022293	-0.964988	0.00264615	-1.12164	0.0954736	-1.07102	0.00356446	-1.08174	0.0256988	-0.864816	-0.00195697	-0.894919	-0.017867	-0.861281	-0.0042073	-0.999711	-0.00538033	-0.664579	0.00678158	-0.785513	-0.00472055	-1.04104	-0.0229964	-0.712032	0.0469411	-0.826203	-0.00326777	-0.66815	0.00476588	-0.770262	-0.00206262	-0.904013	-0.0165824	-0.561286	-0.0039165	-0.671976	0.0154919	-0.943417	-0.00461847	-0.724615	-0.00635686	-0.98455	0.0151402	-0.911475	0.00612208	-0.843482	-0.0113706	-0.96444
2018-06-19T22:42:00	-0.833683	0.020869	-0.905021	0.00248171	-1.05525	0.0898225	-1.00229	0.00333572	-1.01226	0.0240482	-0.808681	-0.00182994	-0.836196	-0.0166946	-0.805078	-0.00393275	-0.931687	-0.00501424	-0.603903	0.00616242	-0.736395	-0.00442538	-0.975942	-0.0215583	-0.662533	0.0436779	-0.774135	-0.00306183	-0.624237	0.00445264	-0.716159	-0.00191774	-0.845107	-0.0155019	-0.497913	-0.0034743	-0.627709	0.0144713	-0.873258	-0.00427501	-0.664274	-0.00582751	-0.914348	0.0140607	-0.839521	0.00563878	-0.778872	-0.0104996	-0.895936
2018-06-19T22:45:00	-0.771692	0.0193172	-0.839731	0.00230268	-0.980619	0.0834699	-0.928154	0.003089	-0.938138	0.0222872	-0.74853	-0.00169383	-0.773426	-0.0154414	-0.744677	-0.0036377	-0.858827	-0.00462211	-0.543197	0.00554296	-0.682938	-0.00410412	-0.904399	-0.0199779	-0.608791	0.0401349	-0.716146	-0.00283247	-0.576478	0.00411198	-0.659355	-0.00176563	-0.780614	-0.0143189	-0.436773	-0.00304769	-0.579968	0.0133707	-0.797429	-0.00390379	-0.599054	-0.00525535	-0.838275	0.0128908	-0.762195	0.00511941	-0.70979	-0.00956833	-0.821673
2018-06-19T22:48:00	-0.705054	0.0176491	-0.769345	0.00210967	-0.900121	0.0766179	-0.848343	0.00282338	-0.858372	0.0203922	-0.684715	-0.00154942	-0.706145	-0.0140982	-0.679599	-0.0033198	-0.782249	-0.00420998	-0.482257	0.00492111	-0.625372	-0.00375818	-0.8274	-0.0182771	-0.551231	0.0363402	-0.655322	-0.00259191	-0.524882	0.00374396	-0.598898	-0.00160374	-0.713361	-0.0130852	-0.377023	-0.00263076	-0.527267	0.0121557	-0.71708	-0.00351045	-0.530256	-0.0046518	-0.756339	0.0116308	-0.680579	0.00457123	-0.63598	-0.00857333	-0.742562
2018-06-19T22:51:00	-0.634231	0.0158762	-0.693199	0.00190086	-0.814383	0.0693199	-0.763732	0.00254178	-0.772776	0.0183587	-0.617788	-0.00139798	-0.636621	-0.0127101	-0.610873	-0.00298407	-0.700946	-0.00377241	-0.421177	0.00429783	-0.563937	-0.00338899	-0.74527	-0.0164628	-0.491278	0.0323878	-0.589644	-0.00233214	-0.470778	0.00335803	-0.535803	-0.00143478	-0.640391	-0.0117468	-0.318153	-0.00221999	-0.470928	0.0108569	-0.633617	-0.00310185	-0.458842	-0.0040253	-0.671453	0.0103255	-0.595257	0.00399814	-0.559774	-0.00754604	-0.659024
2018-06-19T22:54:00	-0.56041	0.0140283	-0.613388	0.00168201	-0.724577	0.0616757	-0.67582	0.0022492	-0.683478	0.0162373	-0.548314	-0.00124077	-0.563627	-0.0112528	-0.539159	-0.00263376	-0.616619	-0.00331857	-0.359906	0.00367259	-0.500084	-0.00300526	-0.659498	-0.0145681	-0.429587	0.0283207	-0.520971	-0.00206052	-0.414499	0.0029566	-0.470014	-0.00125861	-0.564036	-0.0103462	-0.261117	-0.00182201	-0.414092	0.00954657	-0.546086	-0.00267335	-0.385438	-0.00338135	-0.583041	0.0089659	-0.507999	0.00341206	-0.480424	-0.00647636	-0.572607
2018-06-19T22:57:00	-0.484658	0.0121321	-0.532094	0.00145909	-0.630994	0.0537099	-0.584713	0.00194599	-0.591166	0.0140442	-0.477214	-0.00107987	-0.4885	-0.00975288	-0.464687	-0.00226997	-0.530121	-0.00285305	-0.298578	0.00304678	-0.433605	-0.00260575	-0.570577	-0.0126039	-0.366075	0.0241337	-0.450207	-0.00178064	-0.35574	0.00253747	-0.402724	-0.00107842	-0.48615	-0.0089175	-0.205797	-0.00143599	-0.350938	0.0080906	-0.457033	-0.00223739	-0.310616	-0.00272495	-0.492728	0.00757709	-0.419207	0.00281568	-0.399098	-0.00538005	-0.48376
2018-06-19T23:00:00	-0.407349	0.0101969	-0.448058	0.00122865	-0.535431	0.0455757	-0.492476	0.00163901	-0.496532	0.011796	-0.403715	-0.000913556	-0.411196	-0.00820952	-0.389976	-0.00190501	-0.443209	-0.0023853	-0.239795	0.00244695	-0.36487	-0.00219269	-0.480186	-0.0106072	-0.302338	0.0199318	-0.378781	-0.00149814	-0.296815	0.00211716	-0.333724	-0.000893652	-0.407226	-0.00746978	-0.151883	-0.0010598	-0.290807	0.00670433	-0.367501	-0.00179909	-0.236968	-0.00207886	-0.401136	0.00616859	-0.32973	0.00221469	-0.31724	-0.00427655	-0.393732
2018-06-19T23:03:00	-0.294363	0.00736859	-0.331881	0.00091007	-0.402913	0.0342958	-0.368971	0.00122798	-0.379578	0.00901758	-0.310731	-0.000703145	-0.288977	-0.00576941	-0.284033	-0.00138748	-0.321501	-0.00173028	-0.153261	0.00156392	-0.247124	-0.0014851	-0.357487	-0.00789679	-0.215935	0.0142356	-0.267556	-0.00105823	-0.197675	0.00141	-0.243867	-0.000653031	-0.295188	-0.00541466	-0.0554738	-0.000387081	-0.191931	0.00442481	-0.278752	-0.00136462	-0.162791	-0.00142812	-0.310492	0.0047747	-0.241275	0.00162056	-0.236012	-0.00318156	-0.304945
2018-06-19T23:06:00	-0.221178	0.00553658	-0.254061	0.000696677	-0.310981	0.0264706	-0.27924	0.000929341	-0.288876	0.00686278	-0.240848	-0.000545009	-0.215246	-0.00429737	-0.215278	-0.00105162	-0.241877	-0.00130175	-0.0987378	0.00100755	-0.183738	-0.00110417	-0.272476	-0.00601892	-0.161002	0.0106142	-0.203206	-0.000803713	-0.148182	0.00105698	-0.181963	-0.000487265	-0.219761	-0.0040311	-0.00916732	-6.39671e-05	-0.138544	0.00319402	-0.191605	-0.000937998	-0.0914873	-0.000802594	-0.22068	0.00339358	-0.155098	0.00104174	-0.157008	-0.00211655	-0.21656
2018-06-19T23:09:00	-0.153919	0.00385295	-0.180189	0.000494106	-0.225307	0.0191781	-0.194548	0.000647478	-0.204401	0.00485593	-0.1721	-0.00038944	-0.150631	-0.00300734	-0.150046	-0.000732963	-0.166742	-0.000897385	-0.051194	0.0005224	-0.127858	-0.000768363	-0.191598	-0.00423235	-0.10788	0.00711205	-0.143968	-0.000569419	-0.101076	0.00072097	-0.12377	-0.000331434	-0.14926	-0.00273789	0.0279051	0.000194714	-0.0877315	0.00202258	-0.106762	-0.000522648	-0.022777	-0.000199816	-0.134221	0.00206403	-0.0722745	0.000485444	-0.0797902	-0.00107561	-0.132058
2018-06-19T23:12:00	-0.0916404	0.00229397	-0.110988	0.000304346	-0.143846	0.0122441	-0.114457	0.000380926	-0.121665	0.00289039	-0.106247	-0.000240423	-0.0920425	-0.00183762	-0.0882843	-0.000431263	-0.0954801	-0.000513863	-0.00972904	9.92783e-05	-0.0777259	-0.000467094	-0.115579	-0.00255311	-0.0575422	0.0037935	-0.0871748	-0.000344791	-0.0576544	0.000411246	-0.0693975	-0.000185834	-0.0852347	-0.00156347	0.0572634	0.000399569	-0.0431145	0.000993972	-0.0269751	-0.000132056	0.0406102	0.000356263	-0.0514587	0.000791323	0.00537639	-3.61115e-05	-0.006108	-8.23389e-05	-0.0516398
2018-06-19T23:15:00	-0.0344087	0.000861328	-0.0474255	0.000130048	-0.0676058	0.00575458	-0.0405747	0.000135037	-0.0450008	0.00106908	-0.0456531	-0.000103307	-0.0386944	-0.000772531	-0.0311915	-0.000152368	-0.0306549	-0.000164981	0.0251797	-0.000256941	-0.0313912	-0.000188646	-0.0456951	-0.00100939	-0.0125039	0.000824324	-0.0345744	-0.000136747	-0.0180562	0.000128794	-0.0196431	-5.26007e-05	-0.0260484	-0.000477808	0.079172	0.000552441	-0.00451405	0.000104068	0.0462483	0.000226408	0.0982699	0.000862096	0.0243615	-0.000374627	0.0778079	-0.00052261	0.0613997	0.000827699	0.0235402
2018-06-19T23:18:00	0.0501394	-0.0012551	0.0411855	-0.000112937	0.0363643	-0.00309532	0.05221	-0.00017376	0.0458202	-0.00108854	0.0260904	5.90393e-05	0.0515744	0.00102968	0.0479759	0.000234359	0.059167	0.00031843	0.0782354	-0.000798339	0.054676	0.000328576	0.0496536	0.00109684	0.0497782	-0.00328165	0.0496967	0.000196559	0.0549048	-0.000391632	0.0456213	0.000122165	0.0560317	0.00102779	0.133211	0.000929509	0.0663644	-0.00152998	0.111663	0.000546644	0.149085	0.00130789	0.0932216	-0.00143355	0.141483	-0.000950295	0.12057	0.00162534	0.0922896
2018-06-19T23:21:00	0.0901456	-0.00225655	0.0863863	-0.000236885	0.0898874	-0.00765118	0.104921	-0.000349189	0.102134	-0.00242639	0.0707844	0.000160176	0.0866864	0.00173069	0.0869637	0.000424812	0.102157	0.000549799	0.0969931	-0.000989749	0.0824686	0.000495596	0.102342	0.0022607	0.0769033	-0.00506989	0.0816927	0.000323108	0.0755402	-0.000538824	0.0776957	0.000208055	0.0966328	0.00177255	0.133735	0.000933166	0.0900972	-0.00207712	0.167482	0.000819903	0.191601	0.00168086	0.153938	-0.00236723	0.195469	-0.0013129	0.172155	0.00232074	0.151159
2018-06-19T23:24:00	0.117074	-0.00293062	0.119353	-0.000327286	0.12988	-0.0110553	0.145513	-0.000484282	0.146414	-0.00347833	0.106115	0.000240126	0.107552	0.00214728	0.114662	0.000560119	0.133309	0.000717456	0.102692	-0.0010479	0.0969301	0.000582502	0.140463	0.0031028	0.0962191	-0.00634329	0.102558	0.000405634	0.087644	-0.000625159	0.100802	0.00026993	0.124455	0.0022829	0.120676	0.000842042	0.100835	-0.00232467	0.212385	0.00103972	0.224741	0.00197159	0.203129	-0.00312369	0.23889	-0.00160455	0.212458	0.00286404	0.198894
2018-06-19T23:27:00	0.132403	-0.00331436	0.139673	-0.000383007	0.156183	-0.0132942	0.171625	-0.000571188	0.177812	-0.00422425	0.131014	0.000296468	0.11616	0.00231912	0.13192	0.00064442	0.150929	0.000812284	0.0974983	-0.000994904	0.0984941	0.000591901	0.16488	0.00364216	0.105273	-0.00694018	0.113451	0.000448716	0.0910489	-0.000649446	0.114232	0.000305893	0.139622	0.0025611	0.0978259	0.000682603	0.101595	-0.00234219	0.245212	0.00120043	0.247354	0.00216997	0.239077	-0.00367648	0.268595	-0.00180406	0.240666	0.0032443	0.233551
2018-06-19T23:30:00	0.134992	-0.00337916	0.147114	-0.00040341	0.165341	-0.0140737	0.183143	-0.000609519	0.194191	-0.00461336	0.145046	0.000328221	0.110847	0.00221305	0.13531	0.000660982	0.154806	0.000833151	0.0799379	-0.000815712	0.0889384	0.000534477	0.173174	0.00382536	0.104918	-0.0069168	0.113087	0.000447276	0.0833482	-0.000594517	0.115022	0.000308008	0.14257	0.00261518	0.0615033	0.000429154	0.0942998	-0.00217401	0.263133	0.00128816	0.256803	0.00225286	0.25947	-0.00399008	0.283291	-0.00190277	0.256086	0.00345217	0.254023
2018-06-19T23:33:00	0.121703	-0.0030465	0.140294	-0.00038471	0.160014	-0.0136204	0.176884	-0.000588689	0.196263	-0.0046626	0.145321	0.000328842	0.090775	0.00181232	0.121007	0.000591114	0.141044	0.000759082	0.0519683	-0.000530301	0.0675194	0.000405758	0.163059	0.00360194	0.0918465	-0.00605503	0.0984725	0.000389475	0.0694719	-0.000495539	0.108366	0.000290185	0.130873	0.00240061	0.0103769	7.24074e-05	0.0726229	-0.00167426	0.264042	0.00129261	0.251384	0.00220533	0.261645	-0.00402354	0.28063	-0.0018849	0.256127	0.00345272	0.250754
2018-06-19T23:36:00	0.0942587	-0.00235951	0.115666	-0.000317176	0.13288	-0.0113107	0.151313	-0.000503585	0.177872	-0.00422567	0.131903	0.000298481	0.0539923	0.00107795	0.0945656	0.000461947	0.10779	0.000580114	0.00493546	-5.0363e-05	0.0365311	0.000219534	0.136801	0.0030219	0.0654703	-0.00431617	0.0712312	0.000281731	0.0357713	-0.000255155	0.0790753	0.000211749	0.100976	0.00185221	-0.0527934	-0.000368378	0.040797	-0.000940544	0.362624	0.00177522	0.344086	0.00301858	0.342789	-0.00527135	0.374046	-0.00251234	0.35015	0.0047202	0.335808
2018-06-19T23:39:00	0.0468403	-0.00117252	0.0710742	-0.000194897	0.0851936	-0.00725164	0.103967	-0.000346014	0.13546	-0.00321811	0.100256	0.000226867	-0.000755602	-1.50856e-05	0.0511494	0.000249862	0.0544927	0.000293274	-0.0596143	0.000608324	-0.0181421	-0.000109025	0.0899921	0.0019879	0.0218246	-0.0014388	0.0264584	0.000104647	-0.0109709	7.82545e-05	0.0328058	8.7848e-05	0.0518843	0.00095172	-0.133615	-0.000932329	-0.00655972	0.000151229	0.305299	0.00149458	0.293227	0.0025724	0.294287	-0.00452549	0.322191	-0.00216405	0.298867	0.00402888	0.291095
2018-06-19T23:42:00	-0.0210877	0.000527874	0.00652707	-1.78983e-05	0.0123717	-0.00105307	0.0321155	-0.000106884	0.0697648	-0.00165739	0.0510454	0.000115509	-0.076557	-0.00152846	-0.0123814	-6.04825e-05	-0.0220715	-0.000118787	-0.141579	0.00144472	-0.089816	-0.00053975	0.0197676	0.00043666	-0.0386791	0.00254994	-0.0389716	-0.000154139	-0.07508	0.000535541	-0.0308591	-8.26349e-05	-0.0189848	-0.000348241	-0.23167	-0.00161653	-0.0721442	0.00166323	0.218674	0.00107051	0.215604	0.00189144	0.215761	-0.00331793	0.238523	-0.00160208	0.220008	0.00296582	0.217652
2018-06-19T23:45:00	-0.111637	0.00279452	-0.0825855	0.000226463	-0.088374	0.00752236	-0.0667767	0.00022224	-0.0242762	0.000576725	-0.0191967	-4.34397e-05	-0.174407	-0.00348203	-0.0992705	-0.00048493	-0.125369	-0.000674724	-0.243352	0.00248324	-0.18429	-0.00110749	-0.0760704	-0.00168037	-0.119095	0.0078514	-0.124565	-0.000492674	-0.157484	0.00112332	-0.116897	-0.000313029	-0.112921	-0.00207132	-0.348754	-0.00243351	-0.154508	0.00356206	0.106774	0.000522707	0.113347	0.000994365	0.110407	-0.00169782	0.126762	-0.000851419	0.115621	0.00155862	0.116809
2018-06-19T23:48:00	-0.228188	0.00571206	-0.198646	0.000544719	-0.220053	0.0187308	-0.195111	0.000649351	-0.14517	0.00344878	-0.112371	-0.00025428	-0.29942	-0.00597791	-0.21312	-0.00104108	-0.257394	-0.00138527	-0.367365	0.00374871	-0.301789	-0.0018136	-0.199587	-0.00440882	-0.220627	0.0145449	-0.235191	-0.000930221	-0.259277	0.0018494	-0.225257	-0.000603197	-0.233483	-0.00428281	-0.488002	-0.00340515	-0.261587	0.00603068	-0.0336687	-0.000164824	-0.0143399	-0.000125801	-0.0233103	0.000358462	-0.0148462	9.97171e-05	-0.0149398	-0.000201395	-0.0120334
2018-06-19T23:51:00	-0.186254	0.00466237	-0.161896	0.000443944	-0.202898	0.0172706	-0.169032	0.000562556	-0.113999	0.00270826	-0.123031	-0.000278405	-0.265405	-0.0052988	-0.173049	-0.000845333	-0.231773	-0.00124738	-0.336782	0.00343663	-0.261931	-0.00157408	-0.176423	-0.00389713	-0.157813	0.0104039	-0.194326	-0.000768591	-0.201366	0.00143633	-0.172112	-0.000460884	-0.195283	-0.00358209	-0.463099	-0.00323138	-0.208978	0.00481782	-0.0118922	-5.82178e-05	0.0271422	0.000238112	-0.00386665	5.94607e-05	0.00112264	-7.5404e-06	0.010668	0.00014381	0.00452685
2018-06-19T23:54:00	-0.168482	0.00421749	-0.144626	0.000396587	-0.182113	0.0155014	-0.154359	0.000513725	-0.102433	0.00243349	-0.116163	-0.000262862	-0.239033	-0.00477228	-0.157498	-0.000769369	-0.216391	-0.00116459	-0.332627	0.00339423	-0.235891	-0.00141759	-0.15909	-0.00351426	-0.147401	0.00971751	-0.173526	-0.000686325	-0.1843	0.0013146	-0.162622	-0.000435471	-0.177439	-0.00325478	-0.452993	-0.00316087	-0.192429	0.0044363	-0.00885021	-4.33259e-05	0.0221598	0.000194402	-0.00681072	0.000104734	-0.00206646	1.38798e-05	0.0102025	0.000137535	0.00312855
2018-06-19T23:57:00	-0.1643	0.0041128	-0.14051	0.0003853	-0.17759	0.0151164	-0.15121	0.000503243	-0.10085	0.00239587	-0.115251	-0.000260799	-0.2316	-0.00462389	-0.154667	-0.000755539	-0.215807	-0.00116145	-0.334195	0.00341023	-0.228462	-0.00137294	-0.153548	-0.00339183	-0.146536	0.00966046	-0.170127	-0.000672881	-0.182228	0.00129982	-0.161022	-0.000431188	-0.173768	-0.00318744	-0.45851	-0.00319936	-0.193199	0.00445404	-0.02676	-0.000131003	0.00172237	1.51099e-05	-0.0214593	0.000329998	-0.024629	0.000165425	-0.00898402	-0.000121109	-0.0113501
2018-06-20T00:00:00	-0.160593	0.0042476	-0.13641	0.000377392	-0.172688	0.0228554	-0.147452	0.000496967	-0.0983689	0.00244573	-0.113965	-0.000256728	-0.225877	-0.00423142	-0.151624	-0.000732355	-0.215656	-0.00113486	-0.333867	0.00347853	-0.220977	-0.00130985	-0.147338	-0.00316599	-0.143879	0.0117653	-0.165411	-0.00064681	-0.178159	0.00128305	-0.157419	-0.000419846	-0.170193	-0.00298255	-0.461108	-0.0031827	-0.188223	0.00460594	-0.0456333	-0.000219685	-0.0196799	-0.000169042	-0.0382122	0.000625035	-0.0466211	0.000319525	-0.028443	-0.000369599	-0.0254086
2018-06-20T00:03:00	-0.155867	0.00412259	-0.133324	0.000368855	-0.16823	0.0222653	-0.142583	0.000480554	-0.0959719	0.00238613	-0.11229	-0.000252955	-0.217615	-0.00407664	-0.147825	-0.000714007	-0.212202	-0.00111668	-0.330405	0.00344247	-0.214642	-0.0012723	-0.13917	-0.00299049	-0.140537	0.011492	-0.160692	-0.000628358	-0.174391	0.00125591	-0.153779	-0.000410139	-0.165691	-0.00290364	-0.460072	-0.00317555	-0.183923	0.0045007	0.0467744	0.000225179	0.0618768	0.000531498	0.03685	-0.000602753	0.0347931	-0.00023846	0.055472	0.000720825	0.0437883
2018-06-20T00:06:00	-0.149813	0.00396246	-0.127036	0.000351459	-0.162004	0.0214413	-0.136925	0.000461486	-0.0923372	0.00229576	-0.110038	-0.000247881	-0.208249	-0.00390118	-0.143549	-0.000693354	-0.207784	-0.00109343	-0.324042	0.00337617	-0.205289	-0.00121686	-0.130784	-0.00281028	-0.135595	0.0110879	-0.153154	-0.000598881	-0.167142	0.0012037	-0.148874	-0.000397057	-0.161059	-0.00282247	-0.454108	-0.00313439	-0.178953	0.00437909	0.00884521	4.25821e-05	0.0233289	0.000200386	0.00304531	-4.9812e-05	-0.0028727	1.96885e-05	0.0167542	0.00021771	0.0133455
2018-06-20T00:09:00	-0.141881	0.00375269	-0.11921	0.000329807	-0.153805	0.0203562	-0.130132	0.00043859	-0.0873911	0.00217279	-0.107586	-0.000242357	-0.197179	-0.00369381	-0.136059	-0.000657175	-0.202649	-0.00106641	-0.31491	0.00328103	-0.194435	-0.00115252	-0.119455	-0.00256684	-0.129898	0.010622	-0.144668	-0.000565699	-0.158246	0.00113964	-0.142727	-0.000380663	-0.156119	-0.0027359	-0.444271	-0.00306648	-0.171929	0.00420721	-0.0318274	-0.000153222	-0.0184851	-0.00015878	-0.0336504	0.000550418	-0.0447273	0.000306545	-0.0240534	-0.000312559	-0.0208789
2018-06-20T00:12:00	-0.132931	0.00351595	-0.111504	0.000308489	-0.144826	0.0191677	-0.122129	0.000411619	-0.0815216	0.00202686	-0.102299	-0.000230449	-0.185144	-0.00346836	-0.127387	-0.000615289	-0.194609	-0.0010241	-0.301926	0.00314574	-0.181007	-0.00107292	-0.107085	-0.00230103	-0.122897	0.0100495	-0.135	-0.000527896	-0.149408	0.00107599	-0.135973	-0.000362648	-0.148469	-0.00260185	-0.430078	-0.00296852	-0.163784	0.0040079	-0.069467	-0.000334424	-0.0593347	-0.000509662	-0.0673575	0.00110176	-0.084657	0.00058021	-0.0635132	-0.000825315	-0.0525699
2018-06-20T00:15:00	-0.122673	0.00324462	-0.104042	0.000287843	-0.133498	0.0176686	-0.112821	0.000380246	-0.0768375	0.0019104	-0.0967296	-0.000217902	-0.17168	-0.00321613	-0.117132	-0.000565756	-0.184517	-0.000970997	-0.286782	0.00298796	-0.165472	-0.000980845	-0.0935685	-0.00201059	-0.116392	0.00951764	-0.124891	-0.000488367	-0.138081	0.000994414	-0.12758	-0.000340265	-0.138886	-0.00243391	-0.412724	-0.00284874	-0.151082	0.00369706	-0.104895	-0.000504978	-0.0975026	-0.000837509	-0.0984177	0.00160981	-0.122185	0.000837416	-0.099806	-0.00129692	-0.0823791
2018-06-20T00:18:00	-0.110199	0.0029147	-0.0951238	0.000263171	-0.12061	0.0159628	-0.102933	0.000346922	-0.0708449	0.0017614	-0.0908184	-0.000204586	-0.156387	-0.00292964	-0.105805	-0.000511046	-0.173021	-0.000910503	-0.26905	0.00280321	-0.146506	-0.000868421	-0.0788531	-0.00169439	-0.106346	0.00869611	-0.112278	-0.000439044	-0.126924	0.000914066	-0.118595	-0.000316301	-0.127615	-0.00223639	-0.390313	-0.00269405	-0.139095	0.00340374	-0.0268932	-0.000129468	-0.0309981	-0.000266261	-0.037203	0.000608528	-0.0547599	0.000375305	-0.0315975	-0.00041059	-0.0247376
2018-06-20T00:21:00	-0.0978454	0.00258796	-0.0850205	0.000235219	-0.109125	0.0144427	-0.0931468	0.000313938	-0.0657359	0.00163438	-0.0831643	-0.000187344	-0.141316	-0.00264732	-0.0945537	-0.000456702	-0.160377	-0.000843963	-0.248332	0.00258735	-0.129426	-0.000767179	-0.0636422	-0.00136754	-0.0969963	0.00793159	-0.0999572	-0.000390866	-0.113286	0.000815848	-0.108422	-0.000289167	-0.115013	-0.00201554	-0.365816	-0.00252497	-0.127454	0.00311887	-0.0786025	-0.000378403	-0.0833544	-0.000715982	-0.0805485	0.00131753	-0.106465	0.000729673	-0.0835363	-0.0010855	-0.0662636
2018-06-20T00:24:00	-0.0843192	0.0022302	-0.0739318	0.00020454	-0.0948745	0.0125567	-0.0818617	0.000275903	-0.0610337	0.00151747	-0.0747365	-0.000168358	-0.12407	-0.00232424	-0.0827921	-0.000399893	-0.14737	-0.000775514	-0.225519	0.00234967	-0.111322	-0.000659868	-0.0469086	-0.00100797	-0.086928	0.00710829	-0.0867482	-0.000339214	-0.0985901	0.000710014	-0.0975399	-0.000260145	-0.101526	-0.00177919	-0.339056	-0.00234027	-0.111473	0.00272782	-0.131034	-0.000630818	-0.136412	-0.00117173	-0.124629	0.00203855	-0.159425	0.00109264	-0.133809	-0.00173877	-0.109169
2018-06-20T00:27:00	-0.0700945	0.00185396	-0.0604808	0.000167327	-0.0801341	0.0106058	-0.0690563	0.000232744	-0.0561382	0.00139575	-0.0665753	-0.000149974	-0.10613	-0.00198817	-0.0693469	-0.000334952	-0.132837	-0.000699036	-0.201629	0.00210076	-0.0924128	-0.000547781	-0.0299776	-0.000644157	-0.0766242	0.00626572	-0.0721822	-0.000282256	-0.0830877	0.000598371	-0.0852526	-0.000227374	-0.0859507	-0.00150624	-0.307989	-0.00212583	-0.0930668	0.0022774	-0.177419	-0.000854122	-0.185721	-0.00159527	-0.16379	0.0026791	-0.208139	0.00142651	-0.179549	-0.00233313	-0.147916
2018-06-20T00:30:00	-0.0550865	0.00145701	-0.0474739	0.000131342	-0.0646664	0.00855862	-0.0559439	0.000188551	-0.0501653	0.00124725	-0.056338	-0.000126912	-0.085731	-0.00160602	-0.055212	-0.000266678	-0.116406	-0.000612574	-0.175764	0.00183128	-0.0727794	-0.000431403	-0.01251	-0.000268814	-0.0657138	0.00537356	-0.0570134	-0.000222941	-0.0668011	0.00048108	-0.0732145	-0.000195268	-0.0697769	-0.00122281	-0.276205	-0.00190644	-0.0774484	0.00189521	-0.217473	-0.00104695	-0.230076	-0.00197626	-0.198532	0.00324738	-0.251714	0.00172516	-0.219594	-0.00285349	-0.183206
2018-06-20T00:33:00	-0.0395902	0.00104714	-0.0344306	9.52559e-05	-0.0483557	0.00639989	-0.0422322	0.000142338	-0.0460722	0.00114548	-0.0453348	-0.000102125	-0.0643135	-0.0012048	-0.040029	-0.000193344	-0.0995568	-0.000523905	-0.151279	0.00157616	-0.0519405	-0.000307879	0.0108843	0.000233882	-0.0540286	0.00441803	-0.0400726	-0.000156697	-0.0468742	0.000337573	-0.0576006	-0.000153624	-0.057194	-0.0010023	-0.239484	-0.00165299	-0.0600899	0.00147044	-0.252218	-0.00121421	-0.268756	-0.00230851	-0.227438	0.00372019	-0.290563	0.00199142	-0.256955	-0.00333897	-0.221969
2018-06-20T00:36:00	-0.0237599	0.000628437	-0.0233726	6.46629e-05	-0.0300417	0.00397603	-0.027298	9.2004e-05	-0.0336923	0.000837685	-0.0325616	-7.33514e-05	-0.0442695	-0.000829313	-0.0290309	-0.000140222	-0.0829234	-0.000436374	-0.124102	0.00129301	-0.0299866	-0.000177747	0.0274139	0.000589068	-0.0423138	0.00346009	-0.0249879	-9.77109e-05	-0.0314702	0.000226638	-0.0442957	-0.000118139	-0.0435031	-0.000762371	-0.204328	-0.00141033	-0.0433034	0.00105966	-0.281759	-0.00135643	-0.302521	-0.00259854	-0.255635	0.00418141	-0.322437	0.00220987	-0.286732	-0.00372591	-0.244185
2018-06-20T00:39:00	-0.00939247	0.000248426	-0.0111392	3.08179e-05	-0.0144371	0.00191076	-0.014335	4.83141e-05	-0.0251667	0.000625716	-0.0217994	-4.91074e-05	-0.0236355	-0.000442771	-0.0156995	-7.58297e-05	-0.0648855	-0.000341452	-0.0960254	0.00100048	-0.00907814	-5.38111e-05	0.0449412	0.000965693	-0.0300742	0.00245923	-0.00947696	-3.70581e-05	-0.0163049	0.000117423	-0.0317386	-8.4649e-05	-0.0275428	-0.000482674	-0.166158	-0.00114687	-0.0246411	0.000602983	-0.305533	-0.00147088	-0.329482	-0.00283012	-0.275306	0.00450316	-0.350039	0.00239904	-0.311795	-0.00405159	-0.263659
2018-06-20T00:42:00	0.00414576	-0.000109653	0.00151791	-4.1995e-06	-0.00217362	0.000287679	-0.0015287	5.1523e-06	-0.0155779	0.00038731	-0.011869	-2.67372e-05	-0.00294117	-5.50978e-05	-0.00289935	-1.40041e-05	-0.0464407	-0.000244388	-0.0681442	0.000709989	0.0113342	6.71841e-05	0.0617813	0.00132755	-0.0182821	0.00149496	0.00644165	2.5189e-05	-0.000646517	4.656e-06	-0.0191886	-5.11773e-05	-0.0113461	-0.000198835	-0.125855	-0.000868687	-0.00719846	0.000176151	-0.32504	-0.00156479	-0.35165	-0.00302053	-0.292118	0.00477816	-0.373003	0.00255643	-0.331714	-0.00431042	-0.279663
2018-06-20T00:45:00	0.0186107	-0.000492242	0.0131242	-3.63095e-05	0.00999649	-0.00132304	0.0103365	-3.48378e-05	-0.00597693	0.000148603	-0.00177673	-4.0024e-06	0.0168437	0.000315537	0.00961357	4.64343e-05	-0.0279766	-0.000147223	-0.040762	0.000424696	0.0304292	0.000180371	0.077855	0.00167294	-0.00610001	0.00049881	0.0204442	7.99434e-05	0.014347	-0.000103322	-0.00657234	-1.75288e-05	0.00467185	8.18718e-05	-0.0851057	-0.000587424	0.00778478	-0.000190498	-0.339759	-0.00163565	-0.369048	-0.00316998	-0.305143	0.00499122	-0.390488	0.00267627	-0.34657	-0.00450346	-0.291615
2018-06-20T00:48:00	0.0317787	-0.000840529	0.024053	-6.65451e-05	0.0229334	-0.00303524	0.0224337	-7.56097e-05	0.00484496	-0.000120459	0.00628478	1.41577e-05	0.0350266	0.000656163	0.0212892	0.000102829	-0.0103279	-5.43491e-05	-0.0144572	0.000150629	0.047346	0.000280645	0.0931825	0.0020023	0.00632742	-0.000517406	0.0328135	0.000128312	0.0292796	-0.000210862	0.00548056	1.4617e-05	0.0194309	0.000340518	-0.0444772	-0.000306995	0.0246704	-0.0006037	-0.349762	-0.0016838	-0.381504	-0.00327697	-0.314285	0.00514074	-0.403155	0.00276308	-0.356944	-0.00463828	-0.30085
2018-06-20T00:51:00	0.0438202	-0.00115902	0.0351304	-9.71922e-05	0.0349099	-0.00462034	0.0334566	-0.000112761	0.0149336	-0.000371291	0.0158123	3.56202e-05	0.0515706	0.000966087	0.0331047	0.000159898	0.00643766	3.38774e-05	0.0108962	-0.000113527	0.0636757	0.000377441	0.108032	0.00232138	0.0179638	-0.00146894	0.0442651	0.000173091	0.0435461	-0.000313605	0.0167378	4.46408e-05	0.0343722	0.000602356	-0.00541077	-3.73467e-05	0.0417945	-0.00102274	-0.355117	-0.00170959	-0.390019	-0.00335011	-0.320039	0.00523486	-0.410989	0.00281677	-0.362448	-0.00470979	-0.305443
2018-06-20T00:54:00	0.0547074	-0.00144698	0.0451531	-0.000124921	0.0462514	-0.00612138	0.0445479	-0.000150142	0.0250478	-0.00062276	0.0235796	5.31176e-05	0.0666112	0.00124785	0.0437063	0.000211105	0.0225194	0.000118505	0.0354677	-0.000369535	0.0785192	0.000465426	0.122637	0.00263521	0.028755	-0.00235135	0.0546145	0.000213561	0.0571829	-0.000411813	0.0265358	7.07728e-05	0.0468669	0.000821319	0.0332515	0.000229512	0.0543312	-0.00132952	-0.356207	-0.00171483	-0.393383	-0.00337901	-0.321322	0.00525585	-0.413935	0.00283696	-0.362619	-0.00471201	-0.306182
2018-06-20T00:57:00	0.0644102	-0.00170361	0.0530391	-0.000146738	0.0565874	-0.00748936	0.0547556	-0.000184546	0.0358612	-0.00089161	0.031531	7.10297e-05	0.0794268	0.00148792	0.0527902	0.000254981	0.0371465	0.000195479	0.0581251	-0.000605602	0.0918395	0.000544383	0.135839	0.0029189	0.0379704	-0.00310492	0.0654508	0.000255934	0.0696636	-0.000501695	0.0360932	9.6263e-05	0.0584048	0.00102352	0.0689956	0.000476228	0.0661726	-0.00161928	-0.352545	-0.0016972	-0.391889	-0.00336618	-0.318589	0.00521114	-0.412009	0.00282376	-0.358189	-0.00465445	-0.302917
2018-06-20T01:00:00	0.0718706	-0.00190094	0.0603107	-0.000166856	0.0657249	-0.00869871	0.0634043	-0.000213695	0.0452863	-0.00112594	0.0384172	8.65421e-05	0.0904178	0.00169382	0.0607469	0.000293413	0.0510221	0.000268497	0.0792106	-0.00082529	0.104407	0.000618876	0.146685	0.00315195	0.0463269	-0.00378825	0.0735303	0.000287528	0.0804203	-0.000579161	0.0431226	0.000115011	0.067976	0.00119125	0.102008	0.000704087	0.0753612	-0.00184413	-0.344363	-0.00165781	-0.386301	-0.00331817	-0.312677	0.00511445	-0.405969	0.00278237	-0.350226	-0.00455098	-0.296627
2018-06-20T01:03:00	0.0786483	-0.0020802	0.0660443	-0.000182719	0.0748469	-0.00990602	0.0702969	-0.000236926	0.0537782	-0.00133708	0.0447335	0.000100771	0.0988067	0.00185097	0.0659182	0.00031839	0.0607249	0.000319557	0.0979484	-0.00102052	0.115201	0.000682861	0.155991	0.00335193	0.0536531	-0.00438732	0.0784931	0.000306934	0.0902731	-0.000650118	0.0498084	0.000132842	0.0717198	0.00125685	0.132085	0.000911688	0.0825524	-0.00202011	-0.333038	-0.00160329	-0.37681	-0.00323665	-0.301092	0.00492496	-0.396157	0.00271512	-0.340743	-0.00442774	-0.288238
2018-06-20T01:06:00	0.0837124	-0.00221415	0.0704794	-0.000194989	0.0792936	-0.0104945	0.075699	-0.000255133	0.062619	-0.00155689	0.0495754	0.000111678	0.10608	0.00198723	0.0695962	0.000336155	0.0701152	0.000368973	0.114321	-0.0011911	0.122653	0.00072703	0.162762	0.00349742	0.0600375	-0.00490939	0.0842941	0.000329618	0.097192	-0.000699946	0.0540747	0.000144221	0.0781355	0.00136929	0.157206	0.00108508	0.090666	-0.00221865	-0.318557	-0.00153358	-0.363059	-0.00311853	-0.290903	0.00475829	-0.381681	0.00261591	-0.326213	-0.00423894	-0.276356
2018-06-20T01:09:00	0.0866721	-0.00229243	0.0731179	-0.000202288	0.0816489	-0.0108063	0.0785763	-0.00026483	0.0690732	-0.00171736	0.0539196	0.000121464	0.110626	0.00207239	0.0714627	0.000345171	0.0767066	0.000403659	0.127569	-0.00132913	0.127082	0.000753284	0.167366	0.00359635	0.0652508	-0.0053357	0.0871089	0.000340625	0.101536	-0.000731233	0.056787	0.000151455	0.0815648	0.00142938	0.178516	0.00123217	0.0971824	-0.00237811	-0.300729	-0.00144775	-0.347469	-0.00298462	-0.27765	0.00454151	-0.363309	0.00248999	-0.309356	-0.00401989	-0.262796
2018-06-20T01:12:00	0.087557	-0.00231583	0.0732755	-0.000202725	0.0815668	-0.0107954	0.0790221	-0.000266333	0.0729798	-0.00181448	0.0566982	0.000127724	0.112941	0.00211576	0.072322	0.000349321	0.0816839	0.000429851	0.136975	-0.00142713	0.127148	0.000753672	0.169567	0.00364365	0.0693242	-0.00566878	0.0871199	0.000340668	0.103214	-0.000743314	0.0582194	0.000155275	0.0841137	0.00147405	0.192902	0.00133147	0.100384	-0.00245647	-0.279826	-0.00134712	-0.327856	-0.00281615	-0.261639	0.00427962	-0.34064	0.00233463	-0.28836	-0.00374706	-0.245348
2018-06-20T01:15:00	0.0851134	-0.0022512	0.0698722	-0.000193309	0.0785507	-0.0103962	0.0780878	-0.000263184	0.0755762	-0.00187904	0.0577418	0.000130075	0.111043	0.00208021	0.0707479	0.000341718	0.0828154	0.000435806	0.14251	-0.0014848	0.125373	0.000743153	0.169012	0.00363173	0.0701149	-0.00573344	0.0845519	0.000330626	0.10206	-0.000735004	0.0572028	0.000152564	0.0841172	0.00147411	0.201481	0.00139068	0.0977172	-0.0023912	-0.255736	-0.00123115	-0.304745	-0.00261764	-0.241642	0.00395253	-0.314798	0.00215751	-0.264617	-0.00343853	-0.227471
2018-06-20T01:18:00	0.0798261	-0.00211136	0.0648034	-0.000179286	0.0742436	-0.00982617	0.074363	-0.00025063	0.0771913	-0.00191919	0.0566758	0.000127673	0.107571	0.00201515	0.0668991	0.000323128	0.0794404	0.000418045	0.143544	-0.00149558	0.120392	0.000713626	0.165071	0.00354704	0.0694354	-0.00567788	0.0791633	0.000309555	0.0976575	-0.000703298	0.0536609	0.000143117	0.0813179	0.00142506	0.205382	0.0014176	0.0952502	-0.00233083	-0.228195	-0.00109856	-0.278883	-0.00239549	-0.222928	0.00364642	-0.284827	0.0019521	-0.238242	-0.0030958	-0.207624
2018-06-20T01:21:00	0.0719807	-0.00190385	0.0563002	-0.000155761	0.0666698	-0.00882377	0.0675816	-0.000227774	0.0758694	-0.00188633	0.0541795	0.00012205	0.0966663	0.00181088	0.0592345	0.000286108	0.073551	0.000387053	0.137743	-0.00143513	0.110609	0.000655637	0.157412	0.00338246	0.0641378	-0.00524468	0.0717298	0.000280487	0.089309	-0.000643174	0.0466438	0.000124402	0.0756687	0.00132606	0.198469	0.00136989	0.0877649	-0.00214766	-0.199837	-0.000962042	-0.251411	-0.00215952	-0.197774	0.00323497	-0.25307	0.00173446	-0.20951	-0.00272246	-0.18433
2018-06-20T01:24:00	0.0604802	-0.00159967	0.0449008	-0.000124223	0.0549506	-0.00727273	0.0579142	-0.000195192	0.073047	-0.00181615	0.0487016	0.00010971	0.0808669	0.0015149	0.0493171	0.000238206	0.063082	0.000331961	0.126427	-0.00131724	0.0954151	0.000565577	0.146228	0.00314214	0.0568495	-0.0046487	0.0619818	0.000242369	0.0776425	-0.000559156	0.0371045	9.89601e-05	0.0644349	0.00112919	0.18254	0.00125995	0.0728057	-0.0017816	-0.169455	-0.00081578	-0.22135	-0.00190131	-0.173008	0.00282989	-0.219324	0.00150317	-0.17984	-0.00233691	-0.160254
2018-06-20T01:27:00	0.0456171	-0.00120655	0.0302779	-8.37672e-05	0.0397325	-0.00525861	0.0445297	-0.000150081	0.0661199	-0.00164393	0.0403829	9.09704e-05	0.0608373	0.00113968	0.0353173	0.000170585	0.0477428	0.000251241	0.108266	-0.00112801	0.075275	0.000446196	0.131329	0.002822	0.0452355	-0.003699	0.0466724	0.000182505	0.0619556	-0.000446184	0.0247785	6.60858e-05	0.0486377	0.000852351	0.156671	0.00108139	0.0539091	-0.00131919	-0.137725	-0.00066303	-0.190067	-0.0016326	-0.145734	0.00238376	-0.183728	0.00125921	-0.149471	-0.00194228	-0.135924
2018-06-20T01:30:00	0.0275268	-0.00072807	0.0116297	-3.21749e-05	0.0195339	-0.00258532	0.0276463	-9.3178e-05	0.057913	-0.00143988	0.0298914	6.73362e-05	0.0361833	0.000677831	0.0160594	7.75682e-05	0.026856	0.000141326	0.0826273	-0.000860888	0.0495531	0.000293728	0.112287	0.00241282	0.029997	-0.00245292	0.0266187	0.000104088	0.0421717	-0.000303707	0.00840907	2.24275e-05	0.0302683	0.000530438	0.12076	0.000833523	0.0361302	-0.000884128	-0.104546	-0.000503298	-0.156498	-0.00134425	-0.117862	0.00192787	-0.146508	0.00100412	-0.11695	-0.00151969	-0.109677
2018-06-20T01:33:00	0.00461794	-0.000122142	-0.0104504	2.89123e-05	-0.00494619	0.00065463	0.00734106	-2.4742e-05	0.0451406	-0.00112232	0.0158252	3.56493e-05	0.00695622	0.000130313	-0.00649675	-3.13798e-05	0.00029681	1.5619e-06	0.0501025	-0.000522015	0.0191408	0.000113458	0.0892068	0.00191687	0.0108756	-0.000889321	0.00241808	9.4555e-06	0.0174272	-0.000125505	-0.0118596	-3.16303e-05	0.00708776	0.000124209	0.0724401	0.000500003	0.00989851	-0.000242223	-0.0698425	-0.000336232	-0.122807	-0.00105486	-0.0897645	0.00146827	-0.107834	0.000739057	-0.0841448	-0.00109341	-0.0828326
2018-06-20T01:36:00	0.0555932	-0.00147041	0.0391692	-0.000108366	0.0479897	-0.00635146	0.0537281	-0.000181083	0.0844681	-0.00210012	0.0448062	0.000100935	0.0624963	0.00117076	0.0427941	0.000206699	0.0562623	0.000296073	0.090318	-0.000941017	0.0818449	0.000485139	0.135088	0.00290276	0.0447825	-0.00366196	0.0584051	0.000228383	0.0760308	-0.000547549	0.0280737	7.48743e-05	0.0560036	0.000981436	0.129362	0.000892891	0.0659181	-0.00161306	-0.0348626	-0.000167834	-0.0874506	-0.000751166	-0.0604824	0.000989308	-0.0687743	0.000471355	-0.0499037	-0.000648468	-0.056087
2018-06-20T01:39:00	0.0560619	-0.00148281	0.0393461	-0.000108855	0.0481915	-0.00637816	0.0550369	-0.000185494	0.086369	-0.00214738	0.0455108	0.000102522	0.0648864	0.00121554	0.0406293	0.000196243	0.056995	0.000299929	0.0939145	-0.000978488	0.0833831	0.000494257	0.130703	0.00280853	0.0403341	-0.00329821	0.0572697	0.000223944	0.0760027	-0.000547347	0.0277118	7.39091e-05	0.0578434	0.00101368	0.131479	0.000907505	0.0680526	-0.00166529	-7.0074e-05	-3.373e-07	-0.0520431	-0.00044703	-0.0317015	0.000518539	-0.0290761	0.000199278	-0.0157036	-0.000204058	-0.0276875
2018-06-20T01:42:00	0.0525933	-0.00139106	0.0357595	-9.89325e-05	0.0447119	-0.00591763	0.0533543	-0.000179823	0.0880839	-0.00219001	0.0440872	9.93149e-05	0.0598491	0.00112117	0.0379709	0.000183403	0.0550338	0.000289608	0.0923756	-0.000962454	0.0794208	0.00047077	0.123652	0.00265703	0.0340133	-0.00278134	0.0528155	0.000206526	0.0704599	-0.000507429	0.0258228	6.8871e-05	0.05607	0.0009826	0.128604	0.00088766	0.0631424	-0.00154513	0.034793	0.000167499	-0.0161845	-0.000139018	-0.00148753	2.43314e-05	0.0103422	-7.08815e-05	0.0188721	0.000245232	0.000745017
2018-06-20T01:45:00	0.0470303	-0.00124393	0.0304233	-8.41693e-05	0.039534	-0.00523234	0.049752	-0.000167682	0.0872037	-0.00216813	0.0430041	9.6875e-05	0.0530048	0.000992953	0.0329273	0.000159042	0.0507317	0.000266969	0.0884121	-0.00092116	0.0717336	0.000425204	0.115059	0.00247238	0.026629	-0.00217751	0.0472327	0.000184695	0.0646273	-0.000465425	0.0229993	6.13407e-05	0.0521963	0.000914714	0.121748	0.000840337	0.0562038	-0.00137534	0.0687892	0.000331161	0.0186724	0.000160389	0.0270034	-0.000441693	0.0496998	-0.000340625	0.0527533	0.000685497	0.0279379
2018-06-20T01:48:00	0.0396171	-0.00104785	0.0230233	-6.36965e-05	0.0323211	-0.00427771	0.0442311	-0.000149075	0.0856438	-0.00212935	0.040926	9.21936e-05	0.0422608	0.000791684	0.027694	0.000133764	0.0443309	0.000233286	0.0823666	-0.000858172	0.0604623	0.000358392	0.104618	0.00224803	0.0189273	-0.00154772	0.0403079	0.000157617	0.0567747	-0.000408873	0.0188362	5.02372e-05	0.0463305	0.000811919	0.111412	0.000768998	0.0502942	-0.00123073	0.101245	0.000487409	0.053316	0.000457963	0.0543914	-0.000889677	0.0885044	-0.000606578	0.0850803	0.00110557	0.0536875
2018-06-20T01:51:00	0.0301047	-0.000796253	0.0140657	-3.89143e-05	0.0222722	-0.00294773	0.0370586	-0.000124901	0.0808584	-0.00201037	0.036792	8.2881e-05	0.0307766	0.000576547	0.0212418	0.0001026	0.0355214	0.000186927	0.0741715	-0.000772788	0.0460475	0.000272949	0.0913283	0.00196246	0.00994365	-0.000813113	0.0307102	0.000120087	0.0473698	-0.000341142	0.0134534	3.5881e-05	0.0379806	0.000665591	0.097664	0.000674105	0.0420745	-0.00102959	0.13217	0.000636287	0.0870883	0.000748054	0.0811669	-0.00132764	0.124588	-0.000853884	0.116092	0.00150854	0.0780399
2018-06-20T01:54:00	0.019549	-0.000517061	0.00475033	-1.31423e-05	0.0108054	-0.0014301	0.0277248	-9.34426e-05	0.0744579	-0.00185123	0.0321275	7.23733e-05	0.0153889	0.000288284	0.0131834	6.36767e-05	0.0251845	0.00013253	0.0624708	-0.000650878	0.0285385	0.000169163	0.0768292	0.0016509	0.000105176	-8.6005e-06	0.0188809	7.38305e-05	0.0353782	-0.000254783	0.00673907	1.79735e-05	0.0270811	0.000474582	0.0810093	0.00055915	0.0297223	-0.000727323	0.161483	0.000777403	0.118557	0.00101835	0.105612	-0.00172749	0.159224	-0.00109127	0.143648	0.00186662	0.101779
2018-06-20T01:57:00	0.00642688	-0.000169987	-0.00566953	1.56854e-05	-0.00266317	0.000352472	0.016674	-5.61972e-05	0.0663715	-0.00165018	0.0257691	5.80499e-05	-0.00338245	-6.33645e-05	0.00311839	1.50621e-05	0.012574	6.61689e-05	0.0481985	-0.000502177	0.00738221	4.37584e-05	0.0604036	0.00129795	-0.010965	0.000896627	0.00473342	1.85092e-05	0.0207327	-0.00014931	-0.00177476	-4.7334e-06	0.0144198	0.000252699	0.059948	0.000413779	0.0152291	-0.000372665	0.18926	0.000911126	0.148379	0.00127452	0.128638	-0.00210413	0.191511	-0.00131255	0.169085	0.00219716	0.123319
2018-06-20T02:00:00	-0.00920315	0.000243418	-0.0186	5.14591e-05	-0.0184425	0.00244087	0.00348566	-1.17479e-05	0.056395	-0.00140214	0.0175312	3.94924e-05	-0.0247356	-0.000463379	-0.00864782	-4.17697e-05	-0.00247946	-1.30478e-05	0.0323454	-0.000337004	-0.0165277	-9.79686e-05	0.0417064	0.000896185	-0.0231111	0.00188984	-0.0122143	-4.7762e-05	0.00479479	-3.45305e-05	-0.0113203	-3.01919e-05	0.0011633	2.03863e-05	0.0339619	0.000234415	-0.00171287	4.19151e-05	0.214419	0.00103224	0.175411	0.00150671	0.149395	-0.00244365	0.220174	-0.00150899	0.19302	0.00250818	0.143787
2018-06-20T02:03:00	-0.0272463	0.000720651	-0.0329779	9.1237e-05	-0.037146	0.00491629	-0.0131223	4.42269e-05	0.0451231	-0.00112189	0.00744039	1.67609e-05	-0.0488151	-0.000914467	-0.0231149	-0.000111647	-0.0200001	-0.000105248	0.0131652	-0.000137167	-0.0428513	-0.000254003	0.0212464	0.000456541	-0.0360534	0.00294816	-0.0306258	-0.000119757	-0.0135319	9.74526e-05	-0.0209416	-5.58527e-05	-0.0147975	-0.000259319	0.00439056	3.03049e-05	-0.0226122	0.000553333	0.235237	0.00113247	0.199237	0.00171136	0.166837	-0.00272894	0.246086	-0.00168659	0.212626	0.00276294	0.161146
2018-06-20T02:06:00	-0.00166568	4.40564e-05	-0.00691273	1.91248e-05	-0.0107161	0.00141827	0.00759313	-2.55916e-05	0.0614358	-0.00152747	0.0217719	4.90453e-05	-0.0175093	-0.000328006	-0.00018031	-8.709e-07	0.00547109	2.87909e-05	0.0288642	-0.000300734	-0.00925776	-5.48757e-05	0.0406488	0.000873459	-0.0199098	0.00162807	0.000448454	1.7536e-06	0.0174155	-0.000125421	-0.00297702	-7.9399e-06	0.00822788	0.00014419	0.0294373	0.000203185	0.00396244	-9.69633e-05	0.252524	0.00121569	0.219429	0.00188481	0.181381	-0.00296684	0.267705	-0.00183476	0.228321	0.00296689	0.174869
2018-06-20T02:09:00	-0.00493182	0.000130444	-0.0107438	2.97239e-05	-0.0151682	0.00200752	0.00374471	-1.2621e-05	0.0578357	-0.00143796	0.0188515	4.24666e-05	-0.0207927	-0.000389515	-0.00411675	-1.98842e-05	-0.00111602	-5.8729e-06	0.0233756	-0.000243549	-0.0147428	-8.73884e-05	0.0321486	0.000690807	-0.0267119	0.00218429	-0.00421587	-1.64854e-05	0.0111011	-7.99469e-05	-0.00621706	-1.65813e-05	0.00488304	8.55728e-05	0.0197069	0.000136023	0.00115928	-2.83682e-05	0.26562	0.00127873	0.234972	0.00201832	0.19243	-0.00314756	0.283903	-0.00194577	0.239958	0.00311811	0.185882
2018-06-20T02:12:00	-0.0116627	0.000308472	-0.0154756	4.2815e-05	-0.0224982	0.00297765	-0.00213913	7.2096e-06	0.0501659	-0.00124727	0.0154746	3.48594e-05	-0.0289788	-0.000542868	-0.0100202	-4.83983e-05	-0.00952234	-5.01101e-05	0.0152969	-0.000159377	-0.0248565	-0.000147338	0.0219781	0.000472264	-0.0337022	0.0027559	-0.0132514	-5.18173e-05	0.00316277	-2.27773e-05	-0.0108896	-2.90433e-05	-0.000195192	-3.4206e-06	0.00724031	4.99747e-05	-0.00491201	0.0001202	0.274764	0.00132275	0.246176	0.00211456	0.199386	-0.00326134	0.294674	-0.00201959	0.247409	0.00321493	0.191866
2018-06-20T02:15:00	-0.0198857	0.000525966	-0.0215264	5.95552e-05	-0.0314662	0.00416456	-0.00937976	3.16131e-05	0.0416427	-0.00103536	0.0121133	2.72876e-05	-0.0411314	-0.000770526	-0.0173762	-8.39287e-05	-0.0184158	-9.69106e-05	0.00575595	-5.99709e-05	-0.0384643	-0.000227999	0.0101808	0.000218764	-0.0414999	0.00339353	-0.0231473	-9.05136e-05	-0.00671366	4.83496e-05	-0.0168253	-4.48742e-05	-0.00731452	-0.000128183	-0.00733238	-5.06102e-05	-0.0166601	0.000407682	0.278588	0.00134116	0.25099	0.00215591	0.20101	-0.00328791	0.300073	-0.0020566	0.250556	0.00325582	0.194547
2018-06-20T02:18:00	-0.0305057	0.000806858	-0.0290178	8.0281e-05	-0.0409151	0.00541513	-0.0173152	5.83585e-05	0.0320458	-0.000796749	0.00728799	1.64176e-05	-0.0541754	-0.00101488	-0.0257419	-0.000124336	-0.0287104	-0.000151085	-0.00566928	5.90678e-05	-0.0529144	-0.000313652	-0.00271931	-5.84325e-05	-0.0501353	0.00409967	-0.0332367	-0.000129967	-0.018077	0.000130185	-0.0232673	-6.20553e-05	-0.018746	-0.000328515	-0.0241189	-0.000166476	-0.0292415	0.000715557	0.27614	0.00132938	0.249413	0.00214236	0.19823	-0.00324243	0.299493	-0.00205262	0.247478	0.00321582	0.192566
2018-06-20T02:21:00	0.00116352	-3.07746e-05	0.00250518	-6.9309e-06	-0.00602756	0.00079775	0.00798571	-2.69147e-05	0.0483865	-0.00120302	0.0235803	5.31192e-05	-0.0128065	-0.000239907	0.00121176	5.8529e-06	0.00155255	8.1701e-06	0.0147688	-0.000153875	-0.00992363	-5.88227e-05	0.0249612	0.000536365	-0.0300185	0.00245467	0.00385723	1.5083e-05	0.0188768	-0.000135944	-0.0033166	-8.8456e-06	0.00908333	0.000159181	0.00987714	6.81749e-05	0.00525007	-0.000128473	0.267482	0.0012877	0.241216	0.00207195	0.190686	-0.00311904	0.292012	-0.00200135	0.237357	0.00308431	0.186481
2018-06-20T02:24:00	0.00541366	-0.000143188	0.00601621	-1.66445e-05	-0.00100641	0.000133198	0.0106785	-3.59903e-05	0.0453841	-0.00112838	0.0260186	5.86119e-05	-0.0067146	-0.000125787	0.00452097	2.18367e-05	0.00296587	1.56075e-05	0.0167966	-0.000175003	-0.00364028	-2.15779e-05	0.0283182	0.000608499	-0.030739	0.00251359	0.00756154	2.95681e-05	0.0205034	-0.000147659	-0.00349683	-9.3263e-06	0.0125469	0.000219879	0.012036	8.3076e-05	0.00952688	-0.000233129	0.251988	0.00121311	0.225782	0.00193938	0.176747	-0.00289105	0.276828	-0.00189728	0.220289	0.00286252	0.175115
2018-06-20T02:27:00	0.00625221	-0.000165368	0.00781555	-2.16226e-05	0.00210045	-0.000277996	0.012419	-4.18566e-05	0.0401713	-0.000998772	0.0272501	6.1386e-05	-0.00386595	-7.2422e-05	0.00616861	2.97949e-05	0.0041521	2.18499e-05	0.0167862	-0.000174894	-5.85783e-06	-3.47e-08	0.0304882	0.000655129	-0.0319186	0.00261005	0.00820767	3.20947e-05	0.0214471	-0.000154455	-0.00341355	-9.1041e-06	0.014147	0.000247919	0.012192	8.41529e-05	0.0115407	-0.000282409	0.229826	0.00110642	0.203138	0.00174487	0.157856	-0.00258205	0.253504	-0.00173743	0.195363	0.00253862	0.157297
2018-06-20T02:30:00	0.0069509	-0.000183848	0.00908661	-2.51391e-05	0.00503844	-0.000666839	0.0135102	-4.55341e-05	0.0349436	-0.000868796	0.0276422	6.22693e-05	-0.00166374	-3.11674e-05	0.00737403	3.56172e-05	0.00405183	2.13222e-05	0.0155054	-0.00016155	0.00068908	4.0846e-06	0.0321354	0.000690525	-0.0335462	0.00274314	0.00886501	3.46651e-05	0.0230106	-0.000165715	-0.00307566	-8.203e-06	0.014078	0.000246709	0.0132463	9.14296e-05	0.0136561	-0.000334174	0.199896	0.000962327	0.172571	0.00148232	0.131736	-0.0021548	0.220252	-0.00150953	0.164214	0.00213386	0.131963
2018-06-20T02:33:00	0.00704682	-0.000186384	0.0100012	-2.76693e-05	0.00559182	-0.000740079	0.0142518	-4.80335e-05	0.0290747	-0.00072288	0.0287035	6.46602e-05	0.000743582	1.39297e-05	0.00866447	4.18501e-05	0.00463217	2.43762e-05	0.0138574	-0.00014438	7.58626e-05	4.497e-07	0.0326084	0.000700689	-0.0341375	0.00279149	0.00990835	3.87449e-05	0.0237621	-0.000171127	-0.00311716	-8.3137e-06	0.015018	0.000263183	0.0139193	9.60752e-05	0.0103128	-0.00025236	0.162145	0.000780591	0.133166	0.00114384	0.0980983	-0.00160459	0.178084	-0.00122053	0.125292	0.00162809	0.0993519
2018-06-20T02:36:00	0.00695676	-0.000184003	0.0115464	-3.19445e-05	0.00748362	-0.000990459	0.0147066	-4.95665e-05	0.0276169	-0.000686635	0.0283776	6.39261e-05	0.00161904	3.03299e-05	0.00630535	3.04554e-05	0.00444983	2.34167e-05	0.0171327	-0.000178504	0.000481816	2.856e-06	0.0303741	0.000652677	-0.034374	0.00281084	0.00834421	3.26286e-05	0.0300303	-0.000216269	0.00330631	8.8182e-06	0.0173784	0.000304547	0.0129902	8.96623e-05	0.00998877	-0.000244431	0.114388	0.000550678	0.0827426	0.000710727	0.055588	-0.00090925	0.124603	-0.000853985	0.0766767	0.000996366	0.0489897
2018-06-20T02:39:00	0.00869651	-0.000230018	0.0131635	-3.64183e-05	0.0074409	-0.000984806	0.0145436	-4.9017e-05	0.0236567	-0.000588172	0.02837	6.39089e-05	0.00274448	5.14131e-05	0.00684133	3.30442e-05	0.00306893	1.61498e-05	0.0166392	-0.000173363	0.00662691	3.92813e-05	0.03041	0.000653449	-0.0327096	0.00267474	0.00833954	3.26104e-05	0.0299501	-0.000215691	0.00478129	1.2752e-05	0.0182752	0.000320264	0.0140317	9.68507e-05	0.0112886	-0.000276239	0.209093	0.0010066	0.170033	0.00146052	0.131922	-0.00215785	0.209698	-0.0014372	0.164844	0.00214205	0.125019
2018-06-20T02:42:00	0.00872381	-0.00023074	0.0128216	-3.54722e-05	0.00927425	-0.00122745	0.0152173	-5.12877e-05	0.0186819	-0.000464485	0.0294914	6.64351e-05	0.00339472	6.35943e-05	0.00683244	3.30013e-05	0.00255291	1.34344e-05	0.0158134	-0.000164759	0.0085415	5.06301e-05	0.0298067	0.000640484	-0.0322698	0.00263877	0.010188	3.98386e-05	0.0305904	-0.000220302	0.00561639	1.49793e-05	0.0179663	0.00031485	0.0143924	9.93403e-05	0.0132152	-0.000323384	0.198586	0.000956019	0.161676	0.00138873	0.125623	-0.00205481	0.199974	-0.00137055	0.154838	0.00201203	0.117622
2018-06-20T02:45:00	0.0085817	-0.000226981	0.0139291	-3.85363e-05	0.0106514	-0.00140971	0.0150281	-5.06501e-05	0.0157245	-0.000390957	0.0310789	7.00112e-05	0.00462147	8.65753e-05	0.0082922	4.0052e-05	0.00304638	1.60312e-05	0.0156381	-0.000162932	0.0107192	6.35385e-05	0.0286513	0.000615657	-0.0308079	0.00251922	0.0109347	4.27582e-05	0.0301617	-0.000217215	0.00688085	1.83517e-05	0.0176181	0.000308749	0.0164132	0.000113288	0.012414	-0.000303777	0.179402	0.000863666	0.145404	0.00124897	0.11093	-0.00181447	0.181363	-0.001243	0.137126	0.00178187	0.10357
2018-06-20T02:48:00	0.00845559	-0.000223646	0.0148548	-4.10974e-05	0.0118704	-0.00157105	0.0149639	-5.04336e-05	0.011864	-0.000294972	0.032611	7.34627e-05	0.00665413	0.000124654	0.00914333	4.41631e-05	0.00282574	1.48701e-05	0.0159557	-0.000166241	0.0127793	7.57499e-05	0.0270151	0.000580499	-0.0291579	0.0023843	0.0116333	4.54901e-05	0.0296502	-0.000213531	0.00808694	2.15684e-05	0.0160828	0.000281842	0.0183894	0.000126929	0.0150183	-0.000367508	0.154714	0.000744817	0.123883	0.00106411	0.0910859	-0.00148989	0.157684	-0.00108071	0.113309	0.00147238	0.0846924
2018-06-20T02:51:00	0.00915112	-0.000242042	0.015835	-4.38093e-05	0.013202	-0.00174729	0.0147825	-4.98221e-05	0.00863023	-0.000214572	0.032732	7.37353e-05	0.00848571	0.000158965	0.0090374	4.36514e-05	0.00292605	1.5398e-05	0.0163753	-0.000170613	0.013657	8.09523e-05	0.025936	0.000557311	-0.0274586	0.00224534	0.0128569	5.02746e-05	0.0296247	-0.000213347	0.00846443	2.25752e-05	0.0157947	0.000276795	0.0198779	0.000137203	0.0119142	-0.000291548	0.123992	0.000596917	0.0967503	0.000831047	0.0673556	-0.00110173	0.128297	-0.000879305	0.0861284	0.00111919	0.0617166
2018-06-20T02:54:00	0.00893949	-0.000236445	0.0178216	-4.93053e-05	0.0138105	-0.00182783	0.0143012	-4.82002e-05	0.0061382	-0.000152613	0.0312279	7.03469e-05	0.00930106	0.000174239	0.00879317	4.24717e-05	0.00306105	1.61084e-05	0.0156544	-0.000163102	0.0141585	8.39251e-05	0.0248029	0.000532963	-0.0254374	0.00208007	0.0118943	4.65107e-05	0.0290426	-0.000209156	0.00910812	2.42919e-05	0.0165866	0.000290672	0.0205745	0.000142011	0.0129724	-0.000317442	0.0891319	0.000429094	0.0645344	0.000554325	0.0390088	-0.000638066	0.0930875	-0.00063799	0.0534078	0.000694002	0.035251
2018-06-20T02:57:00	0.0085191	-0.000225325	0.0191183	-5.28929e-05	0.0145712	-0.0019285	0.0135865	-4.57914e-05	0.00263413	-6.54918e-05	0.031675	7.1354e-05	0.00970998	0.0001819	0.00870341	4.20382e-05	0.00299942	1.57841e-05	0.0152891	-0.000159296	0.015089	8.94409e-05	0.0239229	0.000514053	-0.0241223	0.00197253	0.01201	4.69631e-05	0.0278889	-0.000200847	0.0100368	2.67687e-05	0.0176043	0.000308506	0.0212814	0.00014689	0.00925164	-0.000226393	0.0485306	0.000233633	0.026995	0.000231877	0.00595986	-9.74852e-05	0.0518624	-0.000355447	0.0161005	0.000209216	0.00378786
2018-06-20T03:00:00	0.0091172	-0.000241145	0.0198868	-5.5019e-05	0.0151013	-0.00199866	0.0133407	-4.49628e-05	0.000538417	-1.33866e-05	0.0315282	7.10233e-05	0.0109326	0.000204803	0.0103187	4.98401e-05	0.00396511	2.08659e-05	0.0153073	-0.000159486	0.0162775	9.64857e-05	0.0231926	0.000498362	-0.0221392	0.00181037	0.0120478	4.71108e-05	0.0260412	-0.00018754	0.0104719	2.79293e-05	0.0184569	0.000323448	0.0216103	0.000149161	0.00820711	-0.000200833	0.00173336	8.3447e-06	-0.0159394	-0.000136913	-0.031382	0.000513314	0.00382259	-2.61987e-05	-0.0267713	-0.000347876	-0.0321593
2018-06-20T03:03:00	0.00787223	-0.000208216	0.0209133	-5.78588e-05	0.015918	-0.00210675	0.013684	-4.612e-05	-0.00201525	5.01048e-05	0.0320912	7.22917e-05	0.0110362	0.000206743	0.0112151	5.41699e-05	0.00448638	2.3609e-05	0.015166	-0.000158013	0.0173	0.000102547	0.0217788	0.000467981	-0.0197063	0.00161143	0.0122688	4.79752e-05	0.0245698	-0.000176943	0.0119869	3.19697e-05	0.0189417	0.000331943	0.0217857	0.000150372	0.0106057	-0.000259527	-0.0520487	-0.00025057	-0.0653279	-0.000561141	-0.0745092	0.00121874	-0.0498111	0.000341388	-0.0742894	-0.000965345	-0.0705492
2018-06-20T03:06:00	0.00597391	-0.000158007	0.0205454	-5.68411e-05	0.0165094	-0.00218502	0.0139506	-4.70185e-05	-0.00489681	0.000121749	0.032735	7.37418e-05	0.0108037	0.000202389	0.0112867	5.45156e-05	0.00612735	3.22444e-05	0.0149884	-0.000156163	0.0161672	9.58315e-05	0.0208777	0.000448618	-0.0183663	0.00150185	0.0112533	4.4004e-05	0.0216367	-0.000155821	0.0108679	2.89854e-05	0.0199411	0.000349457	0.0216644	0.000149534	0.0128326	-0.000314022	0.0312426	0.000150406	0.0117403	0.000100844	-0.00402618	6.58561e-05	0.0229448	-0.000157256	0.00410494	5.33412e-05	-0.00546917
2018-06-20T03:09:00	0.00431504	-0.00011413	0.021024	-5.81652e-05	0.0168474	-0.00222976	0.0137105	-4.62093e-05	-0.00668626	0.000166239	0.0325798	7.33924e-05	0.0107308	0.000201023	0.00919189	4.43976e-05	0.00682192	3.58995e-05	0.0139591	-0.000145439	0.0151548	8.9831e-05	0.0187842	0.000403633	-0.0159415	0.00130357	0.0118351	4.62794e-05	0.0195591	-0.000140858	0.0113538	3.02814e-05	0.0197345	0.000345836	0.0224602	0.000155027	0.0133043	-0.000325565	0.0118007	5.68102e-05	-0.00485766	-4.17254e-05	-0.0190112	0.000310965	0.00286727	-1.96513e-05	-0.0127516	-0.0001657	-0.0180752
2018-06-20T03:12:00	0.00386381	-0.000102196	0.0217723	-6.02355e-05	0.0156654	-0.00207332	0.0136903	-4.61411e-05	-0.00696823	0.00017325	0.0317775	7.1585e-05	0.0111883	0.000209593	0.00967045	4.67091e-05	0.00606974	3.19412e-05	0.0126257	-0.000131546	0.0135932	8.05741e-05	0.0178639	0.000383859	-0.0126329	0.00103302	0.0120471	4.71083e-05	0.0180623	-0.000130079	0.0108839	2.9028e-05	0.0171622	0.00030076	0.0228609	0.000157793	0.0157429	-0.000385239	-0.0156622	-7.54002e-05	-0.0284271	-0.000244178	-0.039791	0.00065086	-0.0237387	0.000162697	-0.0358885	-0.000466349	-0.0374036
2018-06-20T03:15:00	0.00278471	-7.36541e-05	0.0217453	-6.01607e-05	0.0138779	-0.00183675	0.0135442	-4.56489e-05	-0.00472951	0.000117589	0.0313857	7.07024e-05	0.0112845	0.000211396	0.00822411	3.97231e-05	0.00628927	3.30965e-05	0.0120594	-0.000125646	0.0119091	7.05914e-05	0.0169946	0.000365178	-0.00978641	0.000800255	0.0124287	4.86002e-05	0.0151577	-0.000109161	0.0112558	3.00198e-05	0.0147692	0.000258822	0.0234266	0.000161697	0.0138885	-0.00033986	-0.0464207	-0.000223476	-0.0558956	-0.000480121	-0.0638694	0.00104471	-0.0537704	0.000368524	-0.0623579	-0.000810303	-0.0585275
2018-06-20T03:18:00	0.00135091	-3.57308e-05	0.0220537	-6.10139e-05	0.0124796	-0.00165167	0.0139494	-4.70144e-05	-0.00220991	5.49447e-05	0.0302573	6.81604e-05	0.0117776	0.000220633	0.00756626	3.65457e-05	0.00656261	3.45349e-05	0.0111552	-0.000116225	0.0100398	5.9511e-05	0.0156088	0.000335401	-0.00773029	0.000632122	0.0122403	4.78638e-05	0.0105382	-7.58928e-05	0.0113156	3.01794e-05	0.0145111	0.0002543	0.0230701	0.000159237	0.0149467	-0.000365754	-0.0809324	-0.00038962	-0.0868726	-0.000746201	-0.0916809	0.00149962	-0.0874793	0.000599552	-0.0930474	-0.00120909	-0.082095
2018-06-20T03:21:00	0.00136406	-3.60786e-05	0.0217372	-6.01384e-05	0.011552	-0.00152891	0.0138748	-4.67631e-05	-0.000611698	1.52085e-05	0.0290566	6.54556e-05	0.0115785	0.000216903	0.0073349	3.54282e-05	0.00746684	3.92933e-05	0.010176	-0.000106023	0.0118468	7.02222e-05	0.0140523	0.000301955	-0.00352788	0.000288482	0.011004	4.30294e-05	0.00559096	-4.02643e-05	0.0100465	2.67947e-05	0.014224	0.000249269	0.0242093	0.000167099	0.0129132	-0.000315993	0.0238555	0.000114844	0.011448	9.83335e-05	-0.00597471	9.7728e-05	0.00852487	-5.84265e-05	0.00474487	6.16567e-05	0.000801434
2018-06-20T03:24:00	-0.000309179	8.1776e-06	0.0209718	-5.80208e-05	0.00962955	-0.00127447	0.012841	-4.32788e-05	0.00181912	-4.52284e-05	0.0285478	6.43095e-05	0.00991234	0.000185691	0.00562455	2.7167e-05	0.00830392	4.36983e-05	0.0097967	-0.000102071	0.0107714	6.38479e-05	0.0126812	0.000272494	-0.000935304	7.64818e-05	0.00885479	3.46252e-05	0.00160185	-1.1536e-05	0.00760415	2.02807e-05	0.0134935	0.000236467	0.0251892	0.000173863	0.00942857	-0.000230723	0.0272778	0.000131319	0.0165304	0.000141989	-0.00189313	3.09658e-05	0.0128374	-8.79833e-05	0.00861296	0.00011192	0.00822324
2018-06-20T03:27:00	-0.00123293	3.26104e-05	0.0204811	-5.66631e-05	0.00770435	-0.00101967	0.0119374	-4.02332e-05	0.00321408	-7.99111e-05	0.0278787	6.28021e-05	0.00821534	0.0001539	0.00500739	2.41861e-05	0.00842	4.43092e-05	0.0101859	-0.000106127	0.00960112	5.6911e-05	0.0110266	0.00023694	0.00121729	-9.954e-05	0.00766627	2.99777e-05	-0.00210677	1.51723e-05	0.0053761	1.43384e-05	0.0127721	0.000223825	0.0255266	0.000176192	0.00909811	-0.000222636	0.0255255	0.000122883	0.0178431	0.000153265	-0.00218772	3.57844e-05	0.0126605	-8.67703e-05	0.00942573	0.000122482	0.0110686
2018-06-20T03:30:00	-0.00243331	6.43596e-05	0.0202936	-5.61444e-05	0.00642707	-0.000850625	0.0119164	-4.01625e-05	0.00396379	-9.8551e-05	0.0272851	6.1465e-05	0.00584073	0.000109416	0.0040076	1.9357e-05	0.00792042	4.16802e-05	0.0100955	-0.000105184	0.00760146	4.50579e-05	0.00889724	0.000191183	0.00298788	-0.000244325	0.00686964	2.68626e-05	-0.00531446	3.82731e-05	0.00394159	1.05125e-05	0.0142212	0.00024922	0.0262735	0.000181347	0.00690745	-0.000169029	0.023963	0.000115361	0.0178864	0.000153637	-0.00160532	2.62581e-05	0.0118805	-8.14249e-05	0.00976635	0.000126908	0.0137099
2018-06-20T03:33:00	-0.00285819	7.55976e-05	0.0199161	-5.51001e-05	0.00526734	-0.000697135	0.0110312	-3.71792e-05	0.00377004	-9.37339e-05	0.0270911	6.10279e-05	0.00497615	9.32197e-05	0.00531795	2.56861e-05	0.00839901	4.41987e-05	0.0105095	-0.000109498	0.0062765	3.72042e-05	0.00648795	0.000139413	0.00538081	-0.00044	0.00700684	2.73991e-05	-0.00823048	5.92732e-05	0.00229152	6.1116e-06	0.0151073	0.000264748	0.0265378	0.000183171	0.00671086	-0.000164219	0.0222492	0.000107111	0.0175824	0.000151026	-0.00205769	3.36576e-05	0.011526	-7.89951e-05	0.0103297	0.000134228	0.0150146
2018-06-20T03:36:00	-0.00306856	8.11618e-05	0.0209362	-5.79224e-05	0.00194591	-0.000257542	0.0106811	-3.59991e-05	-0.000534495	1.32891e-05	0.0267081	6.01651e-05	0.00506795	9.49394e-05	0.00724688	3.5003e-05	0.00809705	4.26097e-05	0.00848771	-8.84329e-05	0.00490999	2.91042e-05	0.0114928	0.000246957	0.00822717	-0.000672753	0.00876252	3.42644e-05	-0.00617473	4.44684e-05	0.0041144	1.09734e-05	0.0142131	0.000249077	0.0277096	0.000191259	0.00641012	-0.00015686	0.0214874	0.000103443	0.0172622	0.000148275	-0.00113218	1.8519e-05	0.010227	-7.00925e-05	0.00925143	0.000120217	0.00611645
2018-06-20T03:39:00	-0.00224378	5.93467e-05	0.0194336	-5.37651e-05	0.0051964	-0.000687745	0.012456	-4.19811e-05	0.00290902	-7.23265e-05	0.0289267	6.51629e-05	0.00412882	7.73464e-05	0.00665231	3.21312e-05	0.00702202	3.69525e-05	0.00727848	-7.5834e-05	0.00475573	2.81898e-05	0.0106336	0.000228494	0.0100716	-0.000823577	0.00755176	2.95299e-05	-0.00797746	5.74511e-05	0.00487829	1.30107e-05	0.0124912	0.000218903	0.0259346	0.000179008	0.0050795	-0.000124298	0.0207428	9.9859e-05	0.0158967	0.000136546	-0.00393189	6.43137e-05	0.0114652	-7.85785e-05	0.00893326	0.000116082	0.0071654
2018-06-20T03:42:00	-0.00264672	7.00043e-05	0.0194309	-5.37577e-05	0.00603278	-0.00079844	0.0130318	-4.39218e-05	0.00282346	-7.01993e-05	0.0288911	6.50828e-05	0.00404754	7.58238e-05	0.00724764	3.50067e-05	0.00616044	3.24185e-05	0.0073537	-7.66176e-05	0.00528417	3.13221e-05	0.0104012	0.000223501	0.0115942	-0.000948082	0.00714913	2.79555e-05	-0.0095008	6.84217e-05	0.00454838	1.21308e-05	0.0116598	0.000204333	0.0246699	0.000170279	0.00335168	-8.20178e-05	0.0206292	9.9312e-05	0.0159325	0.000136854	-0.00372696	6.09617e-05	0.0116979	-8.01731e-05	0.00840852	0.000109264	0.00786496
2018-06-20T03:45:00	-0.00381816	0.000100988	0.0193903	-5.36453e-05	0.00398459	-0.000527362	0.013598	-4.58301e-05	0.00272519	-6.77558e-05	0.0289972	6.53219e-05	0.00302369	5.66437e-05	0.00775225	3.7444e-05	0.00639126	3.36332e-05	0.00800984	-8.3454e-05	0.00624731	3.70312e-05	0.00979076	0.000210383	0.0128682	-0.00105226	0.00803808	3.14316e-05	-0.0107702	7.75637e-05	0.00329977	8.8007e-06	0.0111632	0.00019563	0.0240842	0.000166236	0.00467278	-0.000114346	0.0203352	9.78964e-05	0.0158229	0.000135913	-0.00376914	6.16517e-05	0.0117033	-8.02104e-05	0.00817303	0.000106204	0.00742227
2018-06-20T03:48:00	-0.00380673	0.000100686	0.0194111	-5.37031e-05	0.00206233	-0.00027295	0.0136459	-4.59914e-05	0.0019638	-4.88255e-05	0.0289358	6.51834e-05	0.00292917	5.48731e-05	0.00867319	4.18922e-05	0.00784676	4.12926e-05	0.00803629	-8.37295e-05	0.00659839	3.91123e-05	0.00926448	0.000199075	0.013822	-0.00113026	0.00885048	3.46083e-05	-0.0117634	8.47159e-05	0.00278235	7.4207e-06	0.0120032	0.00021035	0.0239069	0.000165012	0.0033365	-8.16461e-05	0.0197093	9.48833e-05	0.0158922	0.000136508	-0.00381846	6.24584e-05	0.012314	-8.43955e-05	0.00818063	0.000106302	0.00750456
2018-06-20T03:51:00	-0.00339758	8.98642e-05	0.0189539	-5.24379e-05	0.00207006	-0.000273973	0.0131692	-4.43848e-05	0.00159639	-3.96908e-05	0.0281129	6.33297e-05	0.00258892	4.8499e-05	0.00802448	3.87589e-05	0.00801969	4.22026e-05	0.00863487	-8.99661e-05	0.00605273	3.58778e-05	0.00824065	0.000177075	0.0154446	-0.00126294	0.009552	3.73515e-05	-0.0125164	9.0139e-05	0.00324289	8.649e-06	0.0118919	0.0002084	0.0239616	0.00016539	0.00302379	-7.39939e-05	0.0191111	9.20037e-05	0.0151721	0.000130323	-0.00458578	7.50095e-05	0.0125762	-8.61927e-05	0.00808844	0.000105104	0.00748593
2018-06-20T03:54:00	-0.00350718	9.27629e-05	0.0190303	-5.26495e-05	0.00214544	-0.000283949	0.0124733	-4.20394e-05	0.000498504	-1.23942e-05	0.0283751	6.39204e-05	0.00185668	3.47818e-05	0.0084175	4.06572e-05	0.00781373	4.11187e-05	0.00772974	-8.05356e-05	0.00499893	2.96314e-05	0.00842902	0.000181122	0.0170157	-0.00139141	0.0112453	4.39729e-05	-0.0127391	9.17431e-05	0.00388387	1.03585e-05	0.0125332	0.000219638	0.0225525	0.000155664	0.00317829	-7.77746e-05	0.0186252	8.96646e-05	0.0144058	0.00012374	-0.00476954	7.80152e-05	0.0132422	-9.07572e-05	0.00792863	0.000103028	0.00617424
2018-06-20T03:57:00	-0.00318399	8.42147e-05	0.018995	-5.25517e-05	0.00154793	-0.000204869	0.0120081	-4.04715e-05	0.000272227	-6.7683e-06	0.027516	6.19852e-05	0.00122309	2.29126e-05	0.0100218	4.84059e-05	0.00796253	4.19018e-05	0.00763169	-7.95141e-05	0.00344212	2.04033e-05	0.00877895	0.000188642	0.0185108	-0.00151367	0.0116869	4.56997e-05	-0.0127802	9.20391e-05	0.00462915	1.23463e-05	0.0123785	0.000216926	0.0208477	0.000143897	0.00430844	-0.00010543	0.0179337	8.63355e-05	0.0136507	0.000117254	-0.00446213	7.29869e-05	0.0139082	-9.5322e-05	0.0086343	0.000112197	0.00647098
2018-06-20T04:00:00	-0.0025534	6.7536e-05	0.0179545	-4.96731e-05	0.00136673	-0.000180887	0.0120518	-4.06187e-05	0.000341175	-8.4826e-06	0.0259163	5.83814e-05	0.00108471	2.03201e-05	0.0104769	5.06042e-05	0.00783185	4.12141e-05	0.00692117	-7.21112e-05	0.00308974	1.83146e-05	0.00935932	0.000201113	0.0180586	-0.00147669	0.0140366	5.48879e-05	-0.0123503	8.89426e-05	0.00567565	1.51373e-05	0.0137074	0.000240215	0.0194188	0.000134034	0.00538891	-0.00013187	0.0173987	8.37598e-05	0.0133572	0.000114733	-0.00449699	7.35571e-05	0.0145297	-9.95818e-05	0.0097977	0.000127315	0.00638641
2018-06-20T04:03:00	-0.00244797	6.47475e-05	0.0172477	-4.77177e-05	0.00161215	-0.000213368	0.0125525	-4.23063e-05	-0.000118961	2.9577e-06	0.025164	5.66868e-05	-0.000118776	-2.2251e-06	0.0109208	5.27482e-05	0.00963885	5.07232e-05	0.00611043	-6.36642e-05	0.0025455	1.50886e-05	0.00998402	0.000214536	0.0172226	-0.00140833	0.0159126	6.22234e-05	-0.0120357	8.66775e-05	0.00614434	1.63874e-05	0.0132823	0.000232765	0.0178478	0.000123191	0.00621212	-0.000152014	0.0170351	8.20096e-05	0.0143212	0.000123013	-0.00446672	7.3062e-05	0.0141525	-9.69963e-05	0.0102458	0.000133137	0.00622262
2018-06-20T04:06:00	-0.00249353	6.59524e-05	0.0173358	-4.79613e-05	0.00553343	-0.000732351	0.0131096	-4.41841e-05	0.000193842	-4.8195e-06	0.0254764	5.73906e-05	-0.00310532	-5.81728e-05	0.0097003	4.68533e-05	0.00861126	4.53157e-05	0.00483902	-5.04174e-05	0.00306086	1.81434e-05	0.0103163	0.000221677	0.0162993	-0.00133283	0.0134771	5.26999e-05	-0.00868076	6.2516e-05	0.00635921	1.69604e-05	0.0100938	0.00017689	0.0157979	0.000109041	0.0053633	-0.000131243	0.0167722	8.07438e-05	0.0142371	0.000122291	3.98705e-05	-6.522e-07	0.013726	-9.40733e-05	0.00988828	0.000128492	0.00589287
2018-06-20T04:09:00	-0.00173297	4.58362e-05	0.0179345	-4.96176e-05	0.0055477	-0.00073424	0.0134207	-4.52324e-05	0.00142095	-3.53288e-05	0.0247532	5.57614e-05	-0.00430065	-8.05653e-05	0.00924259	4.46425e-05	0.0091539	4.81712e-05	0.00428872	-4.46838e-05	0.00269774	1.5991e-05	0.0104129	0.000223751	0.0143113	-0.00117026	0.0131361	5.13665e-05	-0.00655124	4.71799e-05	0.00598808	1.59706e-05	0.0103824	0.000181946	0.0138905	9.58764e-05	0.00380238	-9.30464e-05	0.0164135	7.9017e-05	0.0147775	0.000126933	1.90599e-05	-3.118e-07	0.0131615	-9.02041e-05	0.00887677	0.000115348	0.00639475
2018-06-20T04:12:00	-0.00173452	4.58772e-05	0.0180358	-4.98981e-05	0.00624359	-0.000826342	0.01398	-4.71175e-05	0.00150641	-3.74535e-05	0.0234613	5.2851e-05	-0.00564298	-0.000105711	0.00993936	4.8008e-05	0.00917746	4.82952e-05	0.00335556	-3.49613e-05	0.00216655	1.28423e-05	0.0105936	0.000227635	0.0133898	-0.00109492	0.0133845	5.23379e-05	-0.00420964	3.03165e-05	0.0060333	1.60912e-05	0.0100059	0.000175348	0.0135924	9.38189e-05	0.00482104	-0.000117974	0.015992	7.69876e-05	0.0149075	0.000128049	0.00044051	-7.2054e-06	0.0127063	-8.70849e-05	0.00822669	0.000106901	0.0053534
2018-06-20T04:15:00	-0.000709443	1.87644e-05	0.0183138	-5.06671e-05	0.00608994	-0.000806006	0.0136183	-4.58984e-05	0.0013179	-3.27668e-05	0.0205322	4.62528e-05	-0.00608764	-0.000114041	0.011242	5.42996e-05	0.00910521	4.7915e-05	0.0020101	-2.0943e-05	0.00121496	7.2018e-06	0.0111257	0.000239068	0.0134191	-0.00109731	0.0131749	5.15183e-05	-0.00148033	1.06608e-05	0.00685403	1.82801e-05	0.0108583	0.000190287	0.0115297	7.95816e-05	0.00494889	-0.000121102	0.015088	7.26358e-05	0.0146172	0.000125556	-5.1762e-05	8.467e-07	0.0124658	-8.54362e-05	0.00863757	0.00011224	0.00554219
2018-06-20T04:18:00	0.000135731	-3.59e-06	0.0177067	-4.89875e-05	0.00516385	-0.000683437	0.01304	-4.39494e-05	0.0018292	-4.5479e-05	0.0191697	4.31833e-05	-0.00702535	-0.000131608	0.0127976	6.18135e-05	0.0083605	4.39961e-05	0.00123639	-1.28818e-05	0.00141288	8.3749e-06	0.011602	0.000249304	0.0123888	-0.00101305	0.0134559	5.26169e-05	0.00189606	-1.36548e-05	0.00722353	1.92656e-05	0.0119651	0.000209683	0.0100161	6.91339e-05	0.00406015	-9.93543e-05	0.0137633	6.62583e-05	0.0149663	0.000128555	-0.000253534	4.1471e-06	0.0116073	-7.95527e-05	0.00817137	0.000106182	0.00497889
2018-06-20T04:21:00	0.000690633	-1.82669e-05	0.0182308	-5.04374e-05	0.0055056	-0.000728668	0.01315	-4.43201e-05	0.00224057	-5.5707e-05	0.017515	3.9456e-05	-0.00410294	-7.68616e-05	0.0140349	6.77896e-05	0.00676605	3.56055e-05	0.00210271	-2.1908e-05	0.00157965	9.3635e-06	0.0126796	0.00027246	0.0126098	-0.00103113	0.0122466	4.78884e-05	0.00442408	-3.18608e-05	0.00802298	2.13978e-05	0.0131785	0.000230947	0.0115018	7.93885e-05	0.00765966	-0.000187437	0.0143042	6.88623e-05	0.0161347	0.000138591	-0.00346878	5.67386e-05	0.0117274	-8.03758e-05	0.00812019	0.000105517	0.00340765
2018-06-20T04:24:00	0.000969455	-2.56415e-05	0.0187344	-5.18308e-05	0.00560065	-0.000741248	0.0129892	-4.37782e-05	0.00253462	-6.30179e-05	0.0155864	3.51114e-05	-0.00486279	-9.1096e-05	0.0142241	6.87037e-05	0.00686581	3.61304e-05	0.00186133	-1.9393e-05	0.00268553	1.59186e-05	0.0134543	0.000289106	0.0120399	-0.000984527	0.0121184	4.73872e-05	0.00669978	-4.82496e-05	0.00733709	1.95685e-05	0.014617	0.000256157	0.0117937	8.14035e-05	0.00702253	-0.000171846	0.0142187	6.8451e-05	0.0165912	0.000142512	-0.00273691	4.47675e-05	0.0112748	-7.72738e-05	0.00929598	0.000120796	0.00360624
2018-06-20T04:27:00	0.00190157	-5.02954e-05	0.0190554	-5.27189e-05	0.00672654	-0.00089026	0.0129879	-4.37738e-05	0.00331987	-8.25414e-05	0.0143054	3.22257e-05	-0.00553467	-0.000103683	0.0142989	6.90649e-05	0.00722092	3.79992e-05	0.00181071	-1.88657e-05	0.0030231	1.79195e-05	0.0138052	0.000296646	0.011705	-0.000957143	0.012827	5.01579e-05	0.00842863	-6.07003e-05	0.00650393	1.73464e-05	0.0146621	0.000256946	0.0111017	7.66269e-05	0.00643899	-0.000157566	0.0138435	6.66447e-05	0.0174527	0.000149912	-0.00299854	4.9047e-05	0.0105292	-7.21638e-05	0.00857217	0.00011139	0.00354232
2018-06-20T04:30:00	0.00192537	-5.09251e-05	0.0179453	-4.96477e-05	0.00758877	-0.00100438	0.0128472	-4.32998e-05	0.00251617	-6.25591e-05	0.0122627	2.76242e-05	-0.00617221	-0.000115626	0.0137308	6.63209e-05	0.00740532	3.89696e-05	0.00165149	-1.72067e-05	0.00268963	1.59429e-05	0.0136351	0.00029299	0.0116117	-0.000949516	0.013582	5.311e-05	0.00991582	-7.14106e-05	0.00589383	1.57192e-05	0.0140344	0.000245945	0.0100322	6.92453e-05	0.00573198	-0.000140265	0.0137255	6.60766e-05	0.0174231	0.000149658	-0.00335438	5.48675e-05	0.0101063	-6.92653e-05	0.00828657	0.000107679	0.00336368
2018-06-20T04:33:00	0.00260472	-6.88935e-05	0.0167326	-4.62926e-05	0.00760212	-0.00100614	0.0119697	-4.03422e-05	0.00331207	-8.23473e-05	0.0116488	2.62411e-05	-0.00682393	-0.000127835	0.0133317	6.43934e-05	0.00776937	4.08853e-05	0.000717547	-7.4761e-06	0.0023216	1.37614e-05	0.0137637	0.000295753	0.011026	-0.000901615	0.0145906	5.70541e-05	0.0119492	-8.60543e-05	0.00546917	1.45866e-05	0.0131214	0.000229946	0.00994906	6.86713e-05	0.00897162	-0.000219541	0.0137065	6.59852e-05	0.0173139	0.00014872	-0.0038094	6.23102e-05	0.00984566	-6.74787e-05	0.0077142	0.000100241	0.00354462
2018-06-20T04:36:00	0.00348872	-9.22746e-05	0.0162738	-4.50232e-05	0.00805356	-0.00106589	0.0114977	-3.87515e-05	0.00262663	-6.53055e-05	0.0113776	2.56304e-05	-0.00578052	-0.000108288	0.0125315	6.05283e-05	0.00749047	3.94177e-05	0.00103677	-1.0802e-05	0.00135072	8.0064e-06	0.0127639	0.000274269	0.0109683	-0.000896899	0.0152476	5.9623e-05	0.0137917	-9.93237e-05	0.00454599	1.21245e-05	0.0126012	0.00022083	0.00955447	6.59478e-05	0.00768507	-0.000188058	0.0135898	6.5423e-05	0.0172043	0.000147778	-0.00488287	7.98688e-05	0.0101685	-6.96914e-05	0.00720783	9.36613e-05	0.00395006
2018-06-20T04:39:00	0.004237	-0.000112066	0.0157587	-4.35981e-05	0.00752112	-0.000995423	0.011678	-3.93589e-05	0.00259305	-6.44704e-05	0.0111626	2.5146e-05	-0.00595316	-0.000111522	0.0123434	5.96197e-05	0.00773477	4.07033e-05	0.000474588	-4.9447e-06	0.00134984	8.0012e-06	0.0130204	0.000279782	0.0108009	-0.000883215	0.0145334	5.68304e-05	0.0161426	-0.000116254	0.00407583	1.08705e-05	0.0126682	0.000222004	0.00879485	6.07046e-05	0.00689625	-0.000168755	0.0134495	6.47478e-05	0.0177302	0.000152295	-0.0055527	9.08252e-05	0.00956494	-6.55548e-05	0.00762822	9.9124e-05	0.00310374
2018-06-20T04:42:00	0.00556287	-0.000147135	0.0160381	-4.43711e-05	0.00752641	-0.000996123	0.0116432	-3.92416e-05	0.00120447	-2.99464e-05	0.0101561	2.28787e-05	-0.00575136	-0.000107742	0.0120688	5.82932e-05	0.00847727	4.46106e-05	0.0010393	-1.08284e-05	0.000902823	5.3515e-06	0.0132664	0.000285068	0.0103243	-0.000844243	0.0130659	5.10921e-05	0.0177067	-0.000127518	0.00315801	8.4226e-06	0.0128882	0.000225859	0.00826846	5.70713e-05	0.00660021	-0.000161511	0.0132633	6.38513e-05	0.0175034	0.000150347	-0.00656357	0.00010736	0.0093849	-6.43208e-05	0.00758633	9.85797e-05	0.00263654
2018-06-20T04:45:00	0.00579958	-0.000153396	0.0156652	-4.33396e-05	0.00654676	-0.000866466	0.0114752	-3.86755e-05	-0.000201944	5.0209e-06	0.0102163	2.30142e-05	-0.00585886	-0.000109756	0.0134148	6.47945e-05	0.00923336	4.85894e-05	0.00152708	-1.59105e-05	0.00131226	7.7785e-06	0.0134796	0.000289648	0.00887601	-0.00072581	0.0128718	5.03329e-05	0.019772	-0.000142392	0.00274462	7.3201e-06	0.0125558	0.000220035	0.00741476	5.11788e-05	0.00574313	-0.000140538	0.0131726	6.34146e-05	0.0175111	0.000150413	-0.00765787	0.000125259	0.00829835	-5.6874e-05	0.007146	9.28579e-05	0.00226318
2018-06-20T04:48:00	0.00587792	-0.000155468	0.0160257	-4.43368e-05	0.00646445	-0.000855572	0.011449	-3.85871e-05	-4.43709e-05	1.1032e-06	0.0110832	2.4967e-05	-0.00560295	-0.000104962	0.0131789	6.36551e-05	0.0100071	5.26613e-05	0.00160105	-1.66813e-05	0.00175369	1.03951e-05	0.0134759	0.00028957	0.00843187	-0.000689491	0.0118472	4.63264e-05	0.0214479	-0.000154461	0.00180231	4.8069e-06	0.0132607	0.000232388	0.00601056	4.14866e-05	0.00372335	-9.11126e-05	0.0136235	6.55856e-05	0.017541	0.00015067	-0.00727335	0.00011897	0.00779065	-5.33944e-05	0.00730913	9.49776e-05	0.00193463
2018-06-20T04:51:00	0.00614385	-0.000162501	0.0158227	-4.37753e-05	0.00647438	-0.000856886	0.0107377	-3.61897e-05	0.00103163	-2.56491e-05	0.0103816	2.33867e-05	-0.00602456	-0.00011286	0.0125113	6.04305e-05	0.00976741	5.13998e-05	0.00223004	-2.32346e-05	0.00181989	1.07875e-05	0.0138916	0.000298502	0.00727423	-0.000594829	0.0116735	4.56473e-05	0.0225083	-0.000162098	0.000654947	1.7468e-06	0.0125164	0.000219343	0.00538329	3.71571e-05	0.00299779	-7.33578e-05	0.0129566	6.23751e-05	0.0165419	0.000142088	-0.00766191	0.000125326	0.00817921	-5.60575e-05	0.00779541	0.000101296	0.00175354
2018-06-20T04:54:00	0.00670423	-0.000177323	0.0147811	-4.08936e-05	0.00586242	-0.000775893	0.0104196	-3.51177e-05	0.000499212	-1.24118e-05	0.00989254	2.22848e-05	-0.00492807	-9.23189e-05	0.0114008	5.50666e-05	0.01023	5.38342e-05	0.0030187	-3.14517e-05	0.00112812	6.687e-06	0.013701	0.000294407	0.00694672	-0.000568047	0.0138609	5.42007e-05	0.0242449	-0.000174604	-0.000431373	-1.1505e-06	0.0124106	0.00021749	0.00499672	3.44888e-05	0.00283085	-6.92726e-05	0.0119272	5.74193e-05	0.0159592	0.000137084	-0.00907957	0.000148514	0.00769042	-5.27075e-05	0.00793226	0.000103075	0.00109101
2018-06-20T04:57:00	0.0073557	-0.000194554	0.0143866	-3.98021e-05	0.00558451	-0.000739112	0.00957653	-3.22763e-05	0.000529197	-1.31573e-05	0.00921564	2.076e-05	-0.00469334	-8.79216e-05	0.0101122	4.8843e-05	0.0105073	5.52933e-05	0.00327104	-3.40807e-05	0.000535647	3.1751e-06	0.013385	0.000287617	0.00684612	-0.000559821	0.0139227	5.44425e-05	0.0256897	-0.000185009	-0.000665587	-1.7752e-06	0.0104202	0.00018261	0.0052746	3.64068e-05	0.00491044	-0.000120161	0.01117	5.37742e-05	0.0155612	0.000133665	-0.00982964	0.000160783	0.00686954	-4.70814e-05	0.00662733	8.61181e-05	0.0012301
2018-06-20T05:00:00	0.00730612	-0.000193243	0.0140651	-3.89126e-05	0.00539069	-0.000713459	0.00952907	-3.21164e-05	0.000786043	-1.95433e-05	0.0088881	2.00222e-05	-0.00441793	-8.27623e-05	0.00879179	4.24651e-05	0.0106588	5.60908e-05	0.0030441	-3.17162e-05	-5.23909e-05	-3.105e-07	0.0135078	0.000290255	0.00682995	-0.000558499	0.0137358	5.37116e-05	0.0259082	-0.000186582	-0.00147697	-3.9392e-06	0.00898075	0.000157383	0.00570501	3.93777e-05	0.0066321	-0.000162291	0.0102141	4.91721e-05	0.0152607	0.000131083	-0.0103997	0.000170107	0.00632769	-4.33678e-05	0.00701666	9.11772e-05	0.000898289
2018-06-20T05:03:00	0.00838165	-0.00022169	0.0145548	-4.02675e-05	0.004724	-0.000625222	0.00939109	-3.16513e-05	0.0011624	-2.89005e-05	0.00865163	1.94895e-05	-0.003871	-7.25165e-05	0.00847483	4.09341e-05	0.0100128	5.26912e-05	0.00276173	-2.87742e-05	0.000205481	1.218e-06	0.0127907	0.000274847	0.00660471	-0.000540081	0.0121763	4.76132e-05	0.0263334	-0.000189645	-0.00135528	-3.6146e-06	0.00922374	0.000161642	0.00573169	3.95618e-05	0.00654664	-0.0001602	0.0103663	4.99048e-05	0.0147721	0.000126886	-0.0107902	0.000176495	0.00591365	-4.05301e-05	0.00776704	0.000100928	0.001443
2018-06-20T05:06:00	0.00846238	-0.000223825	0.0138275	-3.82553e-05	0.00452094	-0.000598348	0.0094272	-3.1773e-05	0.00170101	-4.22918e-05	0.00838291	1.88841e-05	-0.00436229	-8.172e-05	0.0069168	3.34087e-05	0.00991725	5.21882e-05	0.00308559	-3.21485e-05	0.00109257	6.4762e-06	0.012088	0.000259746	0.00661686	-0.000541074	0.0121357	4.74546e-05	0.0267267	-0.000192477	-0.00187142	-4.9912e-06	0.0091116	0.000159676	0.00624039	4.3073e-05	0.00726717	-0.000177832	0.0102377	4.92857e-05	0.0143994	0.000123686	-0.0108817	0.000177991	0.0059284	-4.06312e-05	0.00747704	9.71596e-05	0.00101426
2018-06-20T05:09:00	0.00871166	-0.000230419	0.0131523	-3.63873e-05	0.0046806	-0.000619479	0.00896001	-3.01984e-05	0.00243725	-6.0597e-05	0.00824024	1.85627e-05	-0.00479633	-8.9851e-05	0.00385084	1.85999e-05	0.00998432	5.25412e-05	0.00286187	-2.98176e-05	0.0013384	7.9334e-06	0.0113127	0.000243087	0.00611435	-0.000499983	0.012856	5.0271e-05	0.0267094	-0.000192352	-0.00260313	-6.9427e-06	0.00916167	0.000160554	0.00691566	4.77339e-05	0.00629412	-0.000154021	0.0101753	4.89851e-05	0.0137683	0.000118264	-0.010459	0.000171077	0.00620261	-4.25106e-05	0.00739556	9.61007e-05	0.00163547
2018-06-20T05:12:00	0.00826734	-0.000218666	0.0114505	-3.16791e-05	0.00459994	-0.000608803	0.00844678	-2.84687e-05	0.00393552	-9.78481e-05	0.00880336	1.98313e-05	-0.00424316	-7.94884e-05	0.00178301	8.6121e-06	0.00868075	4.56813e-05	0.00318608	-3.31956e-05	0.000875437	5.1892e-06	0.0111959	0.000240577	0.00647398	-0.00052939	0.0132485	5.18059e-05	0.0259957	-0.000187213	-0.00311361	-8.3042e-06	0.00914404	0.000160245	0.00741667	5.1192e-05	0.00694145	-0.000169861	0.00978755	4.71187e-05	0.0135749	0.000116603	-0.0103076	0.000168602	0.00636134	-4.35984e-05	0.00723861	9.40614e-05	0.00149044
2018-06-20T05:15:00	0.00782196	-0.000206886	0.010424	-2.88393e-05	0.00464732	-0.000615074	0.00858795	-2.89445e-05	0.00494573	-0.000122965	0.00888817	2.00223e-05	-0.00354535	-6.64161e-05	-2.9269e-05	-1.414e-07	0.00806158	4.24231e-05	0.00355284	-3.70168e-05	0.000245553	1.4555e-06	0.0114762	0.000246601	0.00662548	-0.00054178	0.0122724	4.79893e-05	0.0252475	-0.000181824	-0.00333364	-8.891e-06	0.0100122	0.000175458	0.00800023	5.52199e-05	0.006782	-0.00016596	0.00960673	4.62482e-05	0.012932	0.000111081	-0.00959331	0.000156917	0.00621606	-4.26027e-05	0.00751452	9.76466e-05	0.000453989
2018-06-20T05:18:00	0.00827266	-0.000218807	0.00976005	-2.70022e-05	0.0042686	-0.00056495	0.00844125	-2.845e-05	0.00534196	-0.000132816	0.00855955	1.9282e-05	-0.00202343	-3.79054e-05	-0.00312678	-1.51026e-05	0.00671994	3.53628e-05	0.00317302	-3.30594e-05	0.000763326	4.5246e-06	0.0116798	0.000250976	0.00633285	-0.00051785	0.0126954	4.96432e-05	0.0245633	-0.000176897	-0.00402261	-1.07286e-05	0.0119075	0.000208673	0.0087298	6.02556e-05	0.00554655	-0.000135727	0.00981904	4.72702e-05	0.0136605	0.000117338	-0.0100291	0.000164046	0.00577633	-3.95889e-05	0.00914261	0.000118803	0.00111105
2018-06-20T05:21:00	0.00765339	-0.000202428	0.00962943	-2.66409e-05	0.00426487	-0.000564456	0.00797691	-2.6885e-05	0.00547166	-0.000136041	0.00687233	1.54813e-05	-0.000480355	-8.9986e-06	-0.00477514	-2.30643e-05	0.00572547	3.01296e-05	0.00314069	-3.27226e-05	0.00136496	8.0908e-06	0.012384	0.000266106	0.00651477	-0.000532726	0.0119949	4.69039e-05	0.0225921	-0.000162701	-0.00445527	-1.18825e-05	0.0103321	0.000181066	0.00845763	5.8377e-05	0.00657958	-0.000161006	0.00901425	4.33959e-05	0.0125506	0.000107805	-0.0102127	0.000167049	0.00601236	-4.12066e-05	0.010756	0.000139768	0.000666481
2018-06-20T05:24:00	0.0079256	-0.000209628	0.00980651	-2.71308e-05	0.00397007	-0.00052544	0.00788109	-2.65621e-05	0.00623032	-0.000154903	0.00654935	1.47537e-05	0.00117773	2.20627e-05	-0.00725597	-3.50469e-05	0.00505708	2.66123e-05	0.00339605	-3.53832e-05	0.00252492	1.49665e-05	0.0127102	0.000273117	0.0069771	-0.000570532	0.0124448	4.86632e-05	0.0200432	-0.000144344	-0.00545655	-1.4553e-05	0.0110768	0.000194116	0.00939746	6.4864e-05	0.00699987	-0.000171291	0.00776958	3.74039e-05	0.0110419	9.48456e-05	-0.0099923	0.000163444	0.00625015	-4.28363e-05	0.0119467	0.00015524	0.00051535
2018-06-20T05:27:00	0.00802638	-0.000212293	0.00920624	-2.54701e-05	0.00391637	-0.000518332	0.00772675	-2.60419e-05	0.00640536	-0.000159255	0.00716088	1.61313e-05	0.000958627	1.79582e-05	-0.0108681	-5.24936e-05	0.00444257	2.33785e-05	0.00364441	-3.79708e-05	0.00341683	2.02534e-05	0.0120536	0.000259008	0.00732889	-0.000599299	0.0118855	4.64764e-05	0.0176522	-0.000127126	-0.00590986	-1.5762e-05	0.0107948	0.000189173	0.00989448	6.82945e-05	0.00785623	-0.000192247	0.0065244	3.14094e-05	0.00998934	8.58045e-05	-0.010328	0.000168935	0.00664995	-4.55764e-05	0.0116844	0.000151832	0.00150647
2018-06-20T05:30:00	0.00666634	-0.000176321	0.00917844	-2.53932e-05	0.0037527	-0.000496672	0.00787289	-2.65345e-05	0.00379472	-9.43474e-05	0.00757031	1.70536e-05	0.00181257	3.39553e-05	-0.0143514	-6.93185e-05	0.00420513	2.2129e-05	0.00487103	-5.07509e-05	0.00471255	2.79338e-05	0.0121169	0.000260368	0.00734814	-0.000600873	0.0115225	4.50569e-05	0.0148091	-0.00010665	-0.00627822	-1.67444e-05	0.0117946	0.000206695	0.00983454	6.78809e-05	0.00878749	-0.000215035	0.00700673	3.37314e-05	0.00949397	8.15494e-05	-0.00944896	0.000154556	0.00686316	-4.70377e-05	0.0116044	0.000150792	0.00251496
2018-06-20T05:33:00	0.00631237	-0.000166959	0.00865009	-2.39314e-05	0.00451183	-0.000597141	0.00824559	-2.77906e-05	0.00314877	-7.82874e-05	0.00837374	1.88635e-05	0.002338	4.37984e-05	-0.0162802	-7.86346e-05	0.00367088	1.93175e-05	0.00520458	-5.42261e-05	0.00545713	3.23474e-05	0.0124077	0.000266616	0.00774058	-0.000632963	0.0130575	5.10591e-05	0.0126177	-9.08683e-05	-0.00606593	-1.61782e-05	0.0120539	0.000211238	0.0107375	7.4113e-05	0.0112332	-0.000274884	0.00679906	3.27317e-05	0.00928041	7.97151e-05	-0.00853398	0.00013959	0.00644901	-4.41993e-05	0.0117389	0.00015254	0.00275952
2018-06-20T05:36:00	0.00606412	-0.000160393	0.00771464	-2.13434e-05	0.00601664	-0.000796304	0.00814593	-2.74547e-05	0.00174531	-4.33934e-05	0.0100611	2.26646e-05	0.00401372	7.51902e-05	-0.017928	-8.65939e-05	0.00321948	1.69421e-05	0.00532721	-5.55038e-05	0.00604425	3.58275e-05	0.0122736	0.000263735	0.00808069	-0.000660775	0.0145772	5.70018e-05	0.0104964	-7.55918e-05	-0.00578036	-1.54166e-05	0.013732	0.000240646	0.0114763	7.92128e-05	0.0108456	-0.000265398	0.00771052	3.71195e-05	0.00962091	8.26398e-05	-0.00789921	0.000129207	0.00757744	-5.19331e-05	0.0127712	0.000165953	0.00316938
2018-06-20T05:39:00	0.00682942	-0.000180634	0.00805935	-2.22971e-05	0.00528837	-0.000699917	0.00830132	-2.79784e-05	0.0025789	-6.41187e-05	0.0107446	2.42042e-05	0.00516605	9.67771e-05	-0.0180183	-8.70301e-05	0.00293582	1.54494e-05	0.00588827	-6.13495e-05	0.0070946	4.20535e-05	0.0120671	0.000259297	0.00872213	-0.000713226	0.0150253	5.87539e-05	0.00881201	-6.34612e-05	-0.00496519	-1.32425e-05	0.0160557	0.000281369	0.0117209	8.09011e-05	0.011826	-0.000289388	0.00770009	3.70694e-05	0.00966724	8.30378e-05	-0.00763698	0.000124918	0.00807057	-5.53129e-05	0.0137082	0.00017813	0.00378105
2018-06-20T05:42:00	0.00861581	-0.000227883	0.00949017	-2.62556e-05	0.00497689	-0.000658693	0.00966055	-3.25595e-05	0.00172796	-4.29621e-05	0.0120742	2.71994e-05	0.00642091	0.000120285	-0.0188661	-9.11246e-05	0.00364301	1.91709e-05	0.00696225	-7.25392e-05	0.00841968	4.9908e-05	0.012284	0.000263959	0.0103817	-0.000848932	0.0163941	6.41063e-05	0.00791263	-5.69842e-05	-0.0032091	-8.5589e-06	0.019232	0.000337031	0.0111882	7.72242e-05	0.0113851	-0.000278601	0.0074064	3.56555e-05	0.00941285	8.08527e-05	-0.00768718	0.000125739	0.00943083	-6.46356e-05	0.0155895	0.000202576	0.00459341
2018-06-20T05:45:00	0.00986977	-0.00026105	0.0103767	-2.87082e-05	0.00769631	-0.00101861	0.0113286	-3.81816e-05	0.000263032	-6.5397e-06	0.0136901	3.08396e-05	0.00752727	0.000141011	-0.0203926	-9.84981e-05	0.00365284	1.92226e-05	0.0069074	-7.19677e-05	0.0107531	6.37396e-05	0.0128065	0.000275185	0.0113239	-0.000925976	0.0179619	7.0237e-05	0.0066958	-4.8221e-05	6.86523e-05	1.831e-07	0.0214095	0.000375191	0.0102992	7.10879e-05	0.0116133	-0.000284185	0.0081605	3.92858e-05	0.00967776	8.31282e-05	-0.00576194	9.42478e-05	0.0101529	-6.95847e-05	0.0164853	0.000214216	0.00513402
2018-06-20T05:48:00	0.0111376	-0.000294582	0.0115547	-3.19673e-05	0.0101743	-0.00134657	0.0128047	-4.31565e-05	0.00129762	-3.22625e-05	0.0171927	3.87298e-05	0.00885408	0.000165866	-0.0207534	-0.000100241	0.00430618	2.26607e-05	0.00762463	-7.94405e-05	0.0136872	8.11315e-05	0.0131999	0.000283639	0.0127247	-0.00104052	0.0192674	7.53418e-05	0.00497442	-3.58241e-05	0.0033431	8.9163e-06	0.0244676	0.000428782	0.0105326	7.26988e-05	0.0125864	-0.000307998	0.00936554	4.5087e-05	0.00999579	8.58599e-05	-0.00350612	5.73494e-05	0.0117721	-8.06821e-05	0.0172088	0.000223618	0.00556596
2018-06-20T05:51:00	0.0121441	-0.000321204	0.0127462	-3.52638e-05	0.0133263	-0.00176374	0.0150986	-5.08878e-05	0.00241596	-6.00677e-05	0.0202738	4.56707e-05	0.0109054	0.000204294	-0.0203253	-9.8173e-05	0.00479021	2.52079e-05	0.00814593	-8.48719e-05	0.0172709	0.000102374	0.0130235	0.000279849	0.0139938	-0.0011443	0.0208305	8.1454e-05	0.00280575	-2.02061e-05	0.00754494	2.01228e-05	0.0254038	0.00044519	0.0120472	8.31531e-05	0.0145933	-0.000357106	0.0112345	5.40843e-05	0.0107655	9.24715e-05	-0.0010594	1.73285e-05	0.0139527	-9.56271e-05	0.0179238	0.000232909	0.00579078
2018-06-20T05:54:00	0.014154	-0.000374367	0.0138568	-3.83364e-05	0.0169054	-0.00223744	0.0170627	-5.75074e-05	0.00452319	-0.000112459	0.0233525	5.2606e-05	0.012959	0.000242764	-0.0183201	-8.84876e-05	0.00613414	3.22802e-05	0.00869797	-9.06235e-05	0.0209781	0.000124349	0.013014	0.000279644	0.0150183	-0.00122807	0.0233723	9.13936e-05	0.00147076	-1.0592e-05	0.011289	3.01086e-05	0.028609	0.000501359	0.0147902	0.000102087	0.0152101	-0.0003722	0.0127274	6.12716e-05	0.0118712	0.000101969	0.000670146	-1.09616e-05	0.0161621	-0.00011077	0.0189185	0.000245835	0.00605298
2018-06-20T05:57:00	0.0152254	-0.000402704	0.0159584	-4.41505e-05	0.0203647	-0.00269527	0.0190241	-6.4118e-05	0.00875635	-0.000217707	0.0262365	5.91029e-05	0.0145171	0.000271953	-0.0189541	-9.155e-05	0.00741143	3.90017e-05	0.0081192	-8.45933e-05	0.02499	0.000148129	0.0139334	0.0002994	0.0171609	-0.00140328	0.0273672	0.000107015	0.000615365	-4.4317e-06	0.01541	4.10994e-05	0.0324102	0.000567973	0.0171814	0.000118591	0.0171131	-0.000418769	0.0150798	7.25965e-05	0.0134097	0.000115184	0.00272595	-4.45883e-05	0.018308	-0.000125477	0.0196643	0.000255525	0.00748129
2018-06-20T06:00:00	0.0174719	-0.000462121	0.0181548	-5.02274e-05	0.024512	-0.00324417	0.0217422	-7.32789e-05	0.0175356	-0.000435984	0.0300478	6.76885e-05	0.0165207	0.000309488	-0.0192074	-9.27735e-05	0.00949821	4.99831e-05	0.00748775	-7.80143e-05	0.0288388	0.000170943	0.0142994	0.000307265	0.019193	-0.00156945	0.0307313	0.00012017	0.000209199	-1.5066e-06	0.021526	5.74111e-05	0.0361389	0.000633317	0.0179914	0.000124182	0.0163757	-0.000400724	0.0177945	8.56652e-05	0.0145326	0.000124829	0.00487677	-7.97691e-05	0.0204234	-0.000139975	0.0205645	0.000267224	0.00863149
2018-06-20T06:03:00	0.020887	-0.000552449	0.0206909	-5.72437e-05	0.0274161	-0.00362853	0.0248036	-8.35969e-05	0.0249925	-0.000621383	0.0334593	7.53734e-05	0.0196652	0.000368394	-0.0163586	-7.90132e-05	0.0117425	6.17935e-05	0.00749718	-7.81126e-05	0.0334674	0.000198379	0.0154566	0.000332131	0.0219458	-0.00179455	0.0343624	0.000134369	-1.26642e-05	9.12e-08	0.0278162	7.41877e-05	0.0394502	0.000691346	0.0204646	0.000141253	0.0206534	-0.000505401	0.0210649	0.000101409	0.0158363	0.000136027	0.0070972	-0.000116088	0.0222951	-0.000152803	0.0212872	0.000276614	0.00819347
2018-06-20T06:06:00	0.0241124	-0.00063776	0.023302	-6.44676e-05	0.0330939	-0.00437998	0.0280143	-9.44181e-05	0.0297045	-0.000738538	0.0377423	8.50218e-05	0.0222784	0.000417347	-0.0130044	-6.28122e-05	0.0144887	7.6245e-05	0.0064626	-6.73334e-05	0.0377327	0.000223662	0.0163214	0.000350714	0.0248856	-0.00203495	0.0365719	0.000143008	-0.000128769	9.273e-07	0.0341876	9.11805e-05	0.0433511	0.000759707	0.0225253	0.000155476	0.0246644	-0.000603552	0.0247467	0.000119134	0.0174486	0.000149876	0.0105501	-0.000172568	0.0245338	-0.000168146	0.0233263	0.000303111	0.00858294
2018-06-20T06:09:00	0.0257051	-0.000679886	0.0264608	-7.32066e-05	0.0390052	-0.00516234	0.0316129	-0.000106547	0.0348627	-0.000866785	0.0405727	9.13979e-05	0.0244672	0.000458352	-0.00917094	-4.42964e-05	0.0174074	9.16041e-05	0.007526	-7.84128e-05	0.0439877	0.000260739	0.0171621	0.000368778	0.0265872	-0.00217409	0.0404443	0.000158151	-2.0113e-05	1.448e-07	0.040051	0.000106819	0.0472463	0.000827968	0.0254678	0.000175786	0.0290932	-0.000711927	0.0276652	0.000133184	0.0195269	0.000167728	0.0133695	-0.000218684	0.0256436	-0.000175753	0.0246821	0.000320728	0.0102499
2018-06-20T06:12:00	0.0276216	-0.000730576	0.0288936	-7.99372e-05	0.0452764	-0.00599234	0.0340913	-0.0001149	0.0400548	-0.000995876	0.0452623	0.000101962	0.0258468	0.000484196	-0.00627243	-3.02964e-05	0.0204948	0.000107852	0.0073954	-7.70521e-05	0.0484412	0.000287137	0.0181433	0.000389861	0.0283904	-0.00232155	0.0454844	0.000177859	-0.000503627	3.627e-06	0.045691	0.000121861	0.0499354	0.000875093	0.0285534	0.000197084	0.0330771	-0.000809416	0.030676	0.000147679	0.0225829	0.000193979	0.0158434	-0.00025915	0.0271822	-0.000186298	0.0265704	0.000345266	0.00987274
2018-06-20T06:15:00	0.0303118	-0.000801729	0.031739	-8.78095e-05	0.0503171	-0.00665949	0.0372369	-0.000125502	0.0433429	-0.00107763	0.0492527	0.000110951	0.0282886	0.000529939	-0.00140116	-6.7677e-06	0.0231787	0.000121975	0.00737151	-7.68032e-05	0.053287	0.000315861	0.0188432	0.000404902	0.0306089	-0.00250295	0.0506975	0.000198244	0.000961605	-6.9252e-06	0.0515815	0.000137571	0.0522563	0.000915766	0.0309048	0.000213314	0.0380879	-0.000932033	0.0338808	0.000163107	0.0254057	0.000218225	0.0198335	-0.000324416	0.0300044	-0.000205639	0.0282081	0.000366546	0.0100622
2018-06-20T06:18:00	0.033098	-0.000875423	0.0344165	-9.52169e-05	0.0557961	-0.00738463	0.0406985	-0.000137168	0.0440251	-0.00109459	0.0522998	0.000117815	0.0304145	0.000569763	0.0015754	7.6093e-06	0.026062	0.000137148	0.00698725	-7.27997e-05	0.0579539	0.000343524	0.0206552	0.000443837	0.0327928	-0.00268154	0.055816	0.000218259	0.00323254	-2.32797e-05	0.0577837	0.000154113	0.0530745	0.000930105	0.0337647	0.000233054	0.0425688	-0.00104168	0.0372706	0.000179426	0.0286754	0.00024631	0.0241046	-0.000394277	0.0322123	-0.000220772	0.0299311	0.000388936	0.0100419
2018-06-20T06:21:00	0.0356799	-0.000943715	0.0374127	-0.000103506	0.0609228	-0.00806315	0.0433986	-0.000146269	0.0444768	-0.00110582	0.0547796	0.000123402	0.0335599	0.000628688	0.00345487	1.66873e-05	0.0290336	0.000152785	0.00699975	-7.29299e-05	0.0616314	0.000365323	0.0220667	0.000474167	0.0349636	-0.00285905	0.0614129	0.000240145	0.00400009	-2.88074e-05	0.0637408	0.000170001	0.0551912	0.000967199	0.0367035	0.000253338	0.045442	-0.00111199	0.0398388	0.00019179	0.0314326	0.000269994	0.0271861	-0.000444681	0.033425	-0.000229083	0.0319902	0.000415694	0.0106988
2018-06-20T06:24:00	0.0390806	-0.00103366	0.0391929	-0.000108431	0.0658565	-0.00871613	0.0470788	-0.000158672	0.0484846	-0.00120546	0.0571238	0.000128682	0.0367094	0.000687688	0.00745892	3.60272e-05	0.0315687	0.000166126	0.00689863	-7.18764e-05	0.0672118	0.000398401	0.0236245	0.000507642	0.0372966	-0.00304982	0.0653517	0.000255547	0.00455894	-3.2832e-05	0.0698171	0.000186207	0.0579999	0.00101642	0.0386029	0.000266448	0.0511938	-0.00125274	0.0428639	0.000206353	0.0346832	0.000297915	0.0306067	-0.000500633	0.0352186	-0.000241376	0.0335443	0.000435888	0.0106387
2018-06-20T06:27:00	0.0418947	-0.00110809	0.0412572	-0.000114143	0.0705819	-0.00934153	0.0503426	-0.000169673	0.0486864	-0.00121048	0.0607377	0.000136824	0.0391187	0.000732821	0.0110191	5.32232e-05	0.0345304	0.000181712	0.00711389	-7.41191e-05	0.0716414	0.000424658	0.0255842	0.000549751	0.0391266	-0.00319946	0.0694534	0.000271586	0.00494678	-3.56251e-05	0.0751124	0.00020033	0.0613446	0.00107503	0.0417408	0.000288107	0.0573815	-0.00140416	0.0460343	0.000221616	0.0385044	0.000330738	0.0339591	-0.000555468	0.0371643	-0.000254711	0.0347997	0.000452201	0.0119775
2018-06-20T06:30:00	0.0450626	-0.00119188	0.0439555	-0.000121608	0.0756419	-0.0100112	0.0525485	-0.000177107	0.048023	-0.00119399	0.0622962	0.000140334	0.0410111	0.000768273	0.0142748	6.89485e-05	0.0372485	0.000196016	0.00737293	-7.68181e-05	0.07695	0.000456124	0.0273476	0.000587643	0.0401569	-0.00328371	0.0734538	0.000287229	0.00509632	-3.67021e-05	0.0799077	0.000213119	0.0635973	0.00111451	0.0445335	0.000307383	0.0616782	-0.0015093	0.0491784	0.000236752	0.0418271	0.000359278	0.0370475	-0.000605984	0.0388909	-0.000266545	0.0368321	0.00047861	0.0133509
2018-06-20T06:33:00	0.0479275	-0.00126766	0.0459688	-0.000127178	0.0816945	-0.0108123	0.0559123	-0.000188444	0.0525219	-0.00130584	0.0649491	0.00014631	0.0432014	0.000809303	0.0183465	8.86152e-05	0.0401946	0.000211519	0.00816378	-8.50578e-05	0.0813029	0.000481926	0.0286456	0.000615536	0.0408268	-0.00333849	0.077356	0.000302488	0.00660533	-4.75695e-05	0.0844343	0.000225192	0.0667447	0.00116967	0.0467992	0.000323022	0.0654983	-0.00160278	0.0524822	0.000252657	0.0453779	0.000389778	0.0400134	-0.000654497	0.0400617	-0.000274569	0.038867	0.000505053	0.0143841
2018-06-20T06:36:00	0.0505327	-0.00133656	0.0478454	-0.00013237	0.0879199	-0.0116362	0.058668	-0.000197732	0.0516569	-0.00128434	0.0669823	0.00015089	0.0458537	0.000858991	0.0237875	0.000114896	0.0433179	0.000227955	0.00804394	-8.38092e-05	0.0846282	0.000501637	0.030512	0.000655641	0.0413068	-0.00337774	0.0817276	0.000319582	0.00789394	-5.68496e-05	0.0877277	0.000233975	0.0688481	0.00120653	0.049618	0.000342478	0.0688033	-0.00168366	0.0549393	0.000264486	0.0489552	0.000420506	0.0427011	-0.00069846	0.0420116	-0.000287933	0.0410531	0.00053346	0.0151534
2018-06-20T06:39:00	0.0526189	-0.00139174	0.0496612	-0.000137393	0.0912627	-0.0120787	0.0598772	-0.000201808	0.0520949	-0.00129522	0.0675476	0.000152164	0.0480377	0.000899903	0.0282681	0.000136538	0.0456543	0.00024025	0.00803249	-8.369e-05	0.0873082	0.000517523	0.0320124	0.000687882	0.0419503	-0.00343036	0.0852599	0.000333394	0.00855551	-6.1614e-05	0.0911946	0.000243222	0.0716032	0.00125481	0.0518223	0.000357693	0.0719683	-0.00176111	0.0575368	0.00027699	0.0524093	0.000450175	0.0447363	-0.00073175	0.0432294	-0.000296279	0.0432651	0.000562204	0.0155458
2018-06-20T06:42:00	0.0552264	-0.00146071	0.0514089	-0.000142228	0.0961297	-0.0127228	0.0616375	-0.00020774	0.0535967	-0.00133257	0.0692898	0.000156089	0.0513103	0.000961211	0.0324468	0.000156721	0.0484922	0.000255184	0.00751994	-7.83498e-05	0.088891	0.000526905	0.0333451	0.000716518	0.04227	-0.00345651	0.088111	0.000344543	0.00990457	-7.13295e-05	0.0941852	0.000251198	0.0743667	0.00130324	0.0546755	0.000377386	0.0733647	-0.00179528	0.060265	0.000290124	0.0557436	0.000478816	0.0470243	-0.000769174	0.0448483	-0.000307375	0.0444571	0.000577693	0.015849
2018-06-20T06:45:00	0.0578098	-0.00152904	0.0534627	-0.00014791	0.0999599	-0.0132297	0.0639422	-0.000215508	0.0531105	-0.00132048	0.0713276	0.000160679	0.0547337	0.00102534	0.0375464	0.000181352	0.0500248	0.000263249	0.00821894	-8.56325e-05	0.0917794	0.000544026	0.0350476	0.000753102	0.0425283	-0.00347763	0.0895882	0.00035032	0.0111491	-8.02924e-05	0.0972639	0.000259409	0.075216	0.00131812	0.056007	0.000386577	0.0724096	-0.00177191	0.0626471	0.000301592	0.059043	0.000507156	0.0484207	-0.000792016	0.0467893	-0.000320677	0.0459871	0.000597574	0.0177179
2018-06-20T06:48:00	0.059117	-0.00156361	0.0550136	-0.000152201	0.102349	-0.013546	0.0655023	-0.000220766	0.0555309	-0.00138066	0.0714732	0.000161007	0.0567881	0.00106383	0.0430036	0.000207711	0.0517189	0.000272164	0.00855912	-8.91768e-05	0.094493	0.000560111	0.0364035	0.000782237	0.0430363	-0.00351917	0.0915296	0.000357911	0.0115012	-8.28276e-05	0.0989271	0.000263845	0.0773763	0.00135598	0.0581732	0.000401528	0.0748725	-0.00183218	0.0651581	0.00031368	0.0625555	0.000537327	0.0501056	-0.000819576	0.04756	-0.00032596	0.0466944	0.000606765	0.0178608
2018-06-20T06:51:00	0.0611534	-0.00161747	0.0571676	-0.00015816	0.103555	-0.0137056	0.0676828	-0.000228115	0.0560666	-0.00139397	0.0724428	0.000163191	0.0593309	0.00111146	0.048193	0.000232776	0.054912	0.000288967	0.00919951	-9.58491e-05	0.0972772	0.000576615	0.0379617	0.000815719	0.0422174	-0.00345221	0.0933858	0.000365169	0.0129376	-9.31723e-05	0.0996412	0.000265749	0.0802489	0.00140632	0.060709	0.000419031	0.0745811	-0.00182504	0.0680994	0.00032784	0.0653569	0.00056139	0.0518926	-0.000848806	0.0486129	-0.000333176	0.0472986	0.000614616	0.019273
2018-06-20T06:54:00	0.0620016	-0.00163991	0.0591003	-0.000163507	0.105627	-0.0139798	0.0683578	-0.00023039	0.0528091	-0.00131298	0.0729452	0.000164323	0.0607794	0.0011386	0.0513514	0.000248032	0.0574709	0.000302433	0.0109938	-0.000114543	0.100346	0.000594805	0.0392001	0.00084233	0.0414238	-0.00338731	0.0935688	0.000365885	0.0138088	-9.94462e-05	0.101035	0.000269466	0.0824168	0.00144431	0.0633702	0.000437399	0.0734036	-0.00179623	0.0701183	0.00033756	0.0671142	0.000576485	0.0537611	-0.000879368	0.0499604	-0.000342411	0.0484672	0.000629802	0.0210198
2018-06-20T06:57:00	0.0624283	-0.00165119	0.060959	-0.00016865	0.107998	-0.0142936	0.0695416	-0.00023438	0.058217	-0.00144744	0.0725554	0.000163445	0.0624759	0.00117038	0.0562851	0.000271862	0.0595782	0.000313523	0.0111118	-0.000115773	0.101636	0.000602453	0.0410691	0.000882491	0.0414818	-0.00339205	0.0961427	0.00037595	0.0147595	-0.000106293	0.101812	0.00027154	0.083615	0.00146531	0.0656487	0.000453126	0.0717496	-0.00175576	0.0725229	0.000349136	0.0684663	0.000588099	0.0547338	-0.000895279	0.0514335	-0.000352507	0.050052	0.000650395	0.0207258
2018-06-20T07:00:00	0.0630476	-0.00166757	0.0630756	-0.000174505	0.10885	-0.0144063	0.071091	-0.000239602	0.0579845	-0.00144166	0.0728118	0.000164023	0.06411	0.00120099	0.060565	0.000292534	0.0615069	0.000323672	0.0123815	-0.000129002	0.102068	0.00060501	0.0428157	0.000920022	0.0421214	-0.00344435	0.0988015	0.000386347	0.0158381	-0.000114061	0.103185	0.0002752	0.085673	0.00150138	0.066595	0.000459658	0.0739503	-0.00180961	0.0746956	0.000359595	0.0698212	0.000599736	0.0558876	-0.000914151	0.0531211	-0.000364073	0.0524558	0.000681631	0.0220642
2018-06-20T07:03:00	0.0647995	-0.00171391	0.06516	-0.000180272	0.108955	-0.0144202	0.0716326	-0.000241427	0.0592906	-0.00147413	0.0716649	0.000161439	0.0657619	0.00123194	0.0654412	0.000316086	0.0625532	0.000329178	0.0130422	-0.000135885	0.103203	0.000611742	0.0447577	0.00096175	0.0426021	-0.00348366	0.100472	0.000392878	0.0163958	-0.000118077	0.104446	0.000278563	0.0879524	0.00154132	0.0682985	0.000471416	0.0748445	-0.00183149	0.0758077	0.000364949	0.0708474	0.000608552	0.0568112	-0.000929258	0.0537419	-0.000368328	0.0544743	0.00070786	0.0227355
2018-06-20T07:06:00	0.0667253	-0.00176485	0.0664064	-0.000183721	0.108692	-0.0143854	0.0729718	-0.000245941	0.0640603	-0.00159272	0.0714357	0.000160923	0.0681924	0.00127747	0.0691368	0.000333937	0.0651612	0.000342903	0.0143538	-0.000149551	0.103506	0.000613535	0.0460862	0.000990298	0.0427888	-0.00349893	0.102209	0.000399669	0.0171178	-0.000123277	0.105462	0.000281273	0.0875611	0.00153447	0.0695197	0.000479845	0.0758433	-0.00185593	0.0768749	0.000370087	0.0729703	0.000626786	0.0574047	-0.000938966	0.054785	-0.000375477	0.0563741	0.000732547	0.024882
2018-06-20T07:09:00	0.0678182	-0.00179375	0.068895	-0.000190606	0.110015	-0.0145606	0.0738523	-0.000248909	0.0606376	-0.00150762	0.072135	0.000162498	0.0691973	0.00129629	0.0724122	0.000349757	0.0664847	0.000349867	0.0154935	-0.000161426	0.105028	0.000622558	0.0474847	0.00102035	0.0437257	-0.00357554	0.103567	0.00040498	0.019478	-0.000140274	0.105169	0.000280492	0.0872143	0.00152839	0.0691667	0.000477409	0.0777178	-0.0019018	0.0779592	0.000375307	0.0736923	0.000632988	0.058506	-0.00095698	0.0562974	-0.000385843	0.0588114	0.000764219	0.0263213
2018-06-20T07:12:00	0.0693562	-0.00183443	0.0711903	-0.000196956	0.11081	-0.0146658	0.0746513	-0.000251602	0.0623322	-0.00154975	0.0728271	0.000164057	0.0709824	0.00132973	0.0754141	0.000364256	0.0684555	0.000360239	0.0166558	-0.000173535	0.106463	0.000631061	0.0486058	0.00104444	0.0431152	-0.00352562	0.10385	0.000406088	0.0200706	-0.000144542	0.104429	0.000278518	0.0864576	0.00151513	0.0704094	0.000485986	0.0754245	-0.00184568	0.0792039	0.000381299	0.0740206	0.000635808	0.0591719	-0.000967872	0.0577672	-0.000395916	0.0587045	0.00076283	0.0288801
2018-06-20T07:15:00	0.0698166	-0.00184661	0.0735592	-0.000203509	0.111886	-0.0148081	0.0759707	-0.000256048	0.0626738	-0.00155825	0.0745314	0.000167896	0.072496	0.00135809	0.0781642	0.00037754	0.0703909	0.000370423	0.0184328	-0.000192051	0.106376	0.000630551	0.0502602	0.00107999	0.0433477	-0.00354463	0.106258	0.000415504	0.0208941	-0.000150473	0.104141	0.000277751	0.0861271	0.00150934	0.0719526	0.000496638	0.0753475	-0.0018438	0.0802671	0.000386417	0.0747147	0.000641769	0.0608695	-0.000995639	0.0597048	-0.000409196	0.0604745	0.000785829	0.0302787
2018-06-20T07:18:00	0.0713078	-0.00188605	0.0755934	-0.000209138	0.110502	-0.0146249	0.0774023	-0.000260873	0.0597934	-0.00148663	0.0742991	0.000167373	0.0747217	0.00139978	0.0820833	0.000396469	0.0719004	0.000378367	0.0201571	-0.000210015	0.106619	0.000631991	0.0526292	0.00113089	0.0442501	-0.00361842	0.109233	0.000427136	0.0226967	-0.000163454	0.105055	0.000280189	0.0887433	0.00155518	0.0732992	0.000505932	0.0727564	-0.00178039	0.0815291	0.000392493	0.0751036	0.00064511	0.0624387	-0.00102131	0.0624029	-0.000427687	0.0620692	0.000806551	0.0318906
2018-06-20T07:21:00	0.0731098	-0.00193371	0.0775125	-0.000214447	0.111464	-0.0147523	0.0776543	-0.000261723	0.0597677	-0.00148599	0.073894	0.00016646	0.0751367	0.00140756	0.0865816	0.000418197	0.0730458	0.000384394	0.021024	-0.000219048	0.107639	0.000638034	0.054867	0.00117898	0.0448931	-0.003671	0.112232	0.000438866	0.0251486	-0.000181112	0.105739	0.000282012	0.0912971	0.00159994	0.0746342	0.000515147	0.0705097	-0.00172541	0.0811304	0.000390573	0.0750015	0.000644233	0.0633024	-0.00103543	0.064013	-0.000438723	0.0637338	0.000828182	0.0336451
2018-06-20T07:24:00	0.0745867	-0.00197278	0.079322	-0.000219453	0.112418	-0.0148786	0.0789126	-0.000265964	0.0683015	-0.00169817	0.0743663	0.000167524	0.0767013	0.00143687	0.0911554	0.000440288	0.0740643	0.000389754	0.0228126	-0.000237683	0.107679	0.000638272	0.057172	0.00122851	0.0454219	-0.00371424	0.113948	0.000445576	0.0258411	-0.000186099	0.10654	0.000284149	0.0937451	0.00164284	0.0762261	0.000526135	0.072489	-0.00177385	0.0817884	0.000393741	0.0758867	0.000651837	0.0646117	-0.00105685	0.0661897	-0.000453641	0.0642952	0.000835476	0.0354493
2018-06-20T07:27:00	0.0759164	-0.00200795	0.0825719	-0.000228444	0.11137	-0.0147399	0.0804394	-0.000271109	0.073522	-0.00182797	0.0735336	0.000165649	0.0785535	0.00147157	0.0942514	0.000455242	0.0756178	0.000397929	0.0249734	-0.000260196	0.10982	0.000650962	0.0598818	0.00128674	0.0467944	-0.00382647	0.11707	0.000457784	0.0273766	-0.000197157	0.107285	0.000286136	0.0956625	0.00167644	0.0784028	0.000541159	0.0688283	-0.00168427	0.0830069	0.000399607	0.0762022	0.000654547	0.0670623	-0.00109694	0.0680003	-0.000466051	0.0673004	0.000874527	0.0357431
2018-06-20T07:30:00	0.0769983	-0.00203656	0.0857921	-0.000237353	0.110481	-0.0146222	0.0803104	-0.000270675	0.0713102	-0.00177297	0.071824	0.000161797	0.0791028	0.00148186	0.0949414	0.000458575	0.0765914	0.000403053	0.0269052	-0.000280324	0.111425	0.000660474	0.0623744	0.0013403	0.0469123	-0.00383611	0.117645	0.000460031	0.0289353	-0.000208383	0.106959	0.000285265	0.0968414	0.0016971	0.0788124	0.000543986	0.0661487	-0.0016187	0.0828455	0.00039883	0.076217	0.000654674	0.0679583	-0.00111159	0.0687656	-0.000471296	0.0688415	0.000894553	0.0366329
2018-06-20T07:33:00	0.0778894	-0.00206013	0.0877199	-0.000242687	0.110007	-0.0145595	0.0807493	-0.000272154	0.0741996	-0.00184481	0.0697472	0.000157119	0.0793771	0.00148699	0.0964646	0.000465932	0.0771196	0.000405832	0.0290177	-0.000302333	0.111627	0.000661676	0.064827	0.001393	0.0474669	-0.00388146	0.11836	0.000462827	0.0293218	-0.000211166	0.106209	0.000283267	0.0979204	0.00171601	0.0792847	0.000547246	0.0633692	-0.00155068	0.0840746	0.000404747	0.0758672	0.000651669	0.0681062	-0.00111401	0.0693548	-0.000475333	0.0707242	0.000919017	0.0383581
2018-06-20T07:36:00	0.0787799	-0.00208368	0.0903454	-0.00024995	0.10929	-0.0144646	0.08136	-0.000274212	0.0720054	-0.00179026	0.0693651	0.000156258	0.0799273	0.0014973	0.0952575	0.000460102	0.0780448	0.000410701	0.030242	-0.000315089	0.111403	0.000660344	0.067104	0.00144193	0.0474915	-0.00388348	0.120379	0.000470722	0.0300964	-0.000216744	0.105361	0.000281005	0.0967071	0.00169474	0.0808777	0.000558241	0.0627208	-0.00153482	0.0850366	0.000409378	0.0749818	0.000644064	0.0692873	-0.00113333	0.0701062	-0.000480483	0.0717615	0.000932496	0.0408874
2018-06-20T07:39:00	0.0789528	-0.00208826	0.0919914	-0.000254504	0.108945	-0.0144189	0.0811649	-0.000273555	0.0684859	-0.00170275	0.0689023	0.000155216	0.0808731	0.00151502	0.0949954	0.000458836	0.0783253	0.000412177	0.0322356	-0.000335861	0.109617	0.000649761	0.0686596	0.00147535	0.0476636	-0.00389755	0.121466	0.00047497	0.0306812	-0.000220956	0.103762	0.00027674	0.095057	0.00166583	0.0824599	0.000569162	0.0602559	-0.0014745	0.0849008	0.000408725	0.0748783	0.000643176	0.0694686	-0.0011363	0.0707725	-0.00048505	0.0732691	0.000952087	0.0429233
2018-06-20T07:42:00	0.0802238	-0.00212188	0.0938809	-0.000259732	0.10583	-0.0140067	0.0814173	-0.000274405	0.0716743	-0.00178202	0.0678865	0.000152928	0.0806122	0.00151013	0.0940612	0.000454323	0.0785385	0.000413299	0.0333875	-0.000347862	0.10781	0.000639047	0.0702295	0.00150909	0.0488222	-0.00399229	0.122049	0.000477254	0.0331931	-0.000239046	0.101852	0.000271646	0.0951214	0.00166696	0.083535	0.000576583	0.0560629	-0.00137189	0.085286	0.000410579	0.0744003	0.00063907	0.0695157	-0.00113707	0.071299	-0.000488659	0.074132	0.0009633	0.0436558
2018-06-20T07:45:00	0.082246	-0.00217536	0.0956397	-0.000264598	0.105409	-0.0139509	0.0817942	-0.000275675	0.0693006	-0.00172301	0.0669257	0.000150763	0.0799361	0.00149747	0.0947082	0.000457448	0.0785425	0.00041332	0.0345263	-0.000359728	0.105282	0.000624064	0.0717311	0.00154135	0.0495539	-0.00405212	0.121942	0.000476834	0.0357837	-0.000257703	0.0994957	0.000265361	0.0946734	0.0016591	0.0845111	0.00058332	0.055926	-0.00136854	0.0858437	0.000413264	0.0739763	0.000635427	0.069986	-0.00114476	0.0717592	-0.000491813	0.0745427	0.000968637	0.0448346
2018-06-20T07:48:00	0.0823052	-0.00217693	0.0971899	-0.000268886	0.103106	-0.0136462	0.0816083	-0.000275049	0.0656896	-0.00163323	0.066144	0.000149002	0.0790262	0.00148042	0.0947245	0.000457527	0.0778678	0.000409769	0.0360775	-0.000375889	0.103706	0.00061472	0.0728308	0.00156498	0.0494487	-0.00404352	0.120004	0.000469256	0.0367309	-0.000264524	0.0977649	0.000260745	0.0942955	0.00165248	0.0845369	0.000583498	0.0546052	-0.00133622	0.0856191	0.000412182	0.0728509	0.00062576	0.0698306	-0.00114222	0.0710385	-0.000486873	0.0757956	0.000984918	0.0450596
2018-06-20T07:51:00	0.0832087	-0.00220083	0.098749	-0.0002732	0.101739	-0.0134652	0.082247	-0.000277202	0.0692875	-0.00172268	0.0668859	0.000150673	0.0779423	0.00146012	0.0960872	0.000464109	0.0780782	0.000410876	0.0381024	-0.000396986	0.101884	0.000603919	0.0733075	0.00157523	0.0501951	-0.00410456	0.117873	0.000460922	0.0376576	-0.000271198	0.0962431	0.000256687	0.0939057	0.00164565	0.083934	0.000579337	0.0521687	-0.0012766	0.0863015	0.000415468	0.072424	0.000622093	0.0706704	-0.00115595	0.0711212	-0.00048744	0.0768007	0.000997978	0.0454901
2018-06-20T07:54:00	0.0829119	-0.00219297	0.100493	-0.000278026	0.101019	-0.0133699	0.083203	-0.000280424	0.0694605	-0.00172698	0.0669919	0.000150912	0.078062	0.00146236	0.0961305	0.000464318	0.0785286	0.000413247	0.0405149	-0.000422122	0.099933	0.000592357	0.0738984	0.00158792	0.0501562	-0.00410137	0.114954	0.000449509	0.037543	-0.000270373	0.094296	0.000251493	0.094105	0.00164914	0.0843899	0.000582483	0.0498059	-0.00121878	0.0864384	0.000416127	0.0721705	0.000619916	0.0716782	-0.00117244	0.0716861	-0.000491312	0.0774095	0.00100589	0.0467788
2018-06-20T07:57:00	0.0829759	-0.00219467	0.100252	-0.000277357	0.0996234	-0.0131852	0.0833154	-0.000280803	0.0690078	-0.00171573	0.0668017	0.000150484	0.077392	0.00144981	0.0946961	0.00045739	0.0791701	0.000416623	0.0424002	-0.000441764	0.0969133	0.000574458	0.0747527	0.00160628	0.0509552	-0.00416671	0.114729	0.000448628	0.0376921	-0.000271446	0.0917088	0.000244593	0.0941955	0.00165073	0.0844165	0.000582667	0.0474752	-0.00116175	0.0869229	0.000418459	0.0706438	0.000606803	0.0714282	-0.00116835	0.0713925	-0.0004893	0.0778342	0.00101141	0.0478871
2018-06-20T08:00:00	0.0835957	-0.00221106	0.101491	-0.000280785	0.0991285	-0.0131197	0.0837496	-0.000282266	0.0707561	-0.0017592	0.0669397	0.000150795	0.0769082	0.00144074	0.0929579	0.000448994	0.0793646	0.000417646	0.0443763	-0.000462354	0.0936897	0.000555349	0.0754916	0.00162216	0.0517769	-0.00423391	0.114391	0.000447308	0.0376618	-0.000271228	0.0901857	0.000240531	0.0920379	0.00161292	0.084695	0.00058459	0.0454332	-0.00111178	0.0862036	0.000414997	0.0696527	0.000598289	0.07108	-0.00116265	0.0707024	-0.00048457	0.0767114	0.000996818	0.0491814
2018-06-20T08:03:00	0.0828713	-0.0021919	0.102534	-0.000283671	0.0981407	-0.012989	0.0846935	-0.000285447	0.0700428	-0.00174146	0.0669992	0.000150929	0.0771973	0.00144616	0.0925648	0.000447096	0.0798941	0.000420432	0.0462625	-0.000482006	0.0912948	0.000541154	0.0759809	0.00163267	0.0527632	-0.00431456	0.113807	0.000445023	0.0371517	-0.000267554	0.0888333	0.000236924	0.0916979	0.00160696	0.084455	0.000582933	0.0415055	-0.00101566	0.0855363	0.000411784	0.0689813	0.000592522	0.071847	-0.0011752	0.0697033	-0.000477722	0.0770989	0.00100185	0.0493728
2018-06-20T08:06:00	0.0830581	-0.00219684	0.103733	-0.000286989	0.0968447	-0.0128174	0.0849657	-0.000286365	0.0675769	-0.00168015	0.0679461	0.000153062	0.0770678	0.00144373	0.0926644	0.000447577	0.0801847	0.000421962	0.0474308	-0.000494178	0.0898624	0.000532663	0.0756939	0.00162651	0.0531606	-0.00434705	0.112961	0.000441715	0.0363088	-0.000261484	0.088959	0.000237259	0.090449	0.00158507	0.0839878	0.000579708	0.0412749	-0.00101002	0.0846525	0.000407529	0.0682004	0.000585814	0.0718189	-0.00117474	0.069274	-0.00047478	0.0768621	0.000998775	0.0500629
2018-06-20T08:09:00	0.0837904	-0.00221621	0.105004	-0.000290505	0.0962436	-0.0127379	0.0853896	-0.000287794	0.0708193	-0.00176077	0.0674751	0.000152001	0.0761364	0.00142629	0.0946033	0.000456942	0.0810803	0.000426675	0.0485446	-0.000505783	0.0886839	0.000525677	0.0751308	0.00161441	0.0539833	-0.00441432	0.111958	0.000437792	0.0352549	-0.000253894	0.0884833	0.000235991	0.0899542	0.0015764	0.0832985	0.00057495	0.0390987	-0.000956768	0.0848049	0.000408263	0.0674735	0.000579571	0.0739313	-0.00120929	0.0682683	-0.000467887	0.0765188	0.000994315	0.0501
2018-06-20T08:12:00	0.0842493	-0.00222835	0.105924	-0.000293051	0.0959071	-0.0126933	0.0859363	-0.000289636	0.0719666	-0.00178929	0.0673599	0.000151741	0.0749805	0.00140463	0.0962274	0.000464787	0.0822085	0.000432612	0.0490987	-0.000511555	0.0881082	0.000522265	0.0741792	0.00159396	0.0549717	-0.00449515	0.11021	0.000430956	0.0345557	-0.000248859	0.0877653	0.000234076	0.0901419	0.00157969	0.082608	0.000570184	0.0395857	-0.000968686	0.0854188	0.000411218	0.0661736	0.000568405	0.0755155	-0.0012352	0.0675569	-0.000463012	0.0765846	0.00099517	0.0512823
2018-06-20T08:15:00	0.084316	-0.00223011	0.107175	-0.000296511	0.0969108	-0.0128262	0.0871776	-0.00029382	0.0685498	-0.00170434	0.0696985	0.000157009	0.0746871	0.00139913	0.0964194	0.000465714	0.0831179	0.000437397	0.0505653	-0.000526836	0.0861373	0.000510582	0.0740018	0.00159015	0.0563678	-0.00460931	0.108425	0.000423978	0.0334798	-0.000241111	0.0872567	0.000232719	0.0891777	0.0015628	0.0821918	0.000567312	0.0374672	-0.000916844	0.0864372	0.000416121	0.0663013	0.000569502	0.0758183	-0.00124016	0.0680597	-0.000466457	0.0758886	0.000986126	0.0518148
2018-06-20T08:18:00	0.0840445	-0.00222293	0.10729	-0.000296828	0.0984364	-0.0130281	0.0887035	-0.000298962	0.0677885	-0.00168541	0.0707757	0.000159436	0.0732302	0.00137184	0.0977958	0.000472362	0.0838312	0.000441151	0.0521187	-0.000543021	0.0840563	0.000498247	0.0734983	0.00157933	0.057544	-0.00470549	0.105783	0.000413647	0.0328131	-0.00023631	0.0863398	0.000230274	0.088464	0.00155029	0.0811316	0.000559994	0.0364138	-0.000891067	0.0870809	0.00041922	0.0654587	0.000562265	0.076899	-0.00125783	0.0683305	-0.000468313	0.0746087	0.000969495	0.0524484
2018-06-20T08:21:00	0.0851214	-0.00225141	0.107036	-0.000296126	0.0999724	-0.0132314	0.0899299	-0.000303096	0.0687892	-0.00171029	0.0723857	0.000163063	0.0746554	0.00139854	0.0970429	0.000468725	0.084768	0.000446081	0.051768	-0.000539368	0.0833982	0.000494346	0.0731511	0.00157187	0.0587205	-0.00480169	0.106247	0.000415459	0.0326583	-0.000235195	0.0850171	0.000226746	0.0881641	0.00154503	0.0822988	0.00056805	0.0356492	-0.000872358	0.0884828	0.000425969	0.0664252	0.000570567	0.0786003	-0.00128566	0.0689139	-0.000472312	0.0752564	0.00097791	0.0533269
2018-06-20T08:24:00	0.0855945	-0.00226393	0.107653	-0.000297834	0.101695	-0.0134593	0.0904005	-0.000304682	0.0679963	-0.00169058	0.0735913	0.000165779	0.0749999	0.00140499	0.0985296	0.000475906	0.0859173	0.000452129	0.0521439	-0.000543284	0.0825677	0.000489423	0.0735851	0.00158119	0.0607759	-0.00496977	0.105228	0.000411478	0.0317838	-0.000228897	0.0839171	0.000223812	0.0866179	0.00151794	0.0814792	0.000562393	0.0373217	-0.000913284	0.0891479	0.000429171	0.066302	0.000569508	0.0793671	-0.0012982	0.0698149	-0.000478487	0.074983	0.000974359	0.0534847
2018-06-20T08:27:00	0.0860312	-0.00227548	0.107123	-0.000296367	0.102084	-0.0135108	0.0906689	-0.000305587	0.0627882	-0.00156109	0.0728372	0.00016408	0.0755901	0.00141605	0.0971544	0.000469264	0.0867926	0.000456735	0.0518053	-0.000539756	0.0819808	0.000485945	0.0743108	0.00159679	0.0627163	-0.00512844	0.105479	0.000412458	0.0307929	-0.00022176	0.0826699	0.000220486	0.0873171	0.00153019	0.081535	0.000562778	0.0390351	-0.000955213	0.0888191	0.000427588	0.0660128	0.000567024	0.0804619	-0.00131611	0.0696993	-0.000477695	0.0745129	0.00096825	0.0536455
2018-06-20T08:30:00	0.0865296	-0.00228866	0.107201	-0.000296583	0.103487	-0.0136965	0.0909933	-0.00030668	0.061988	-0.0015412	0.0725888	0.00016352	0.0751696	0.00140817	0.097555	0.000471199	0.0879651	0.000462905	0.0514366	-0.000535915	0.0816942	0.000484246	0.0738238	0.00158632	0.0647124	-0.00529167	0.103568	0.000404985	0.0306049	-0.000220406	0.0816742	0.00021783	0.0854145	0.00149685	0.0809845	0.000558979	0.0428819	-0.00104935	0.0884965	0.000426035	0.0660054	0.000566961	0.0820974	-0.00134286	0.0698767	-0.00047891	0.0744732	0.000967734	0.0534285
2018-06-20T08:33:00	0.0866764	-0.00229254	0.107514	-0.00029745	0.103789	-0.0137365	0.0920977	-0.000310402	0.0591622	-0.00147094	0.0726754	0.000163715	0.0757093	0.00141828	0.0970566	0.000468791	0.0885294	0.000465875	0.0516448	-0.000538084	0.0825466	0.000489299	0.0735265	0.00157993	0.0658183	-0.0053821	0.10098	0.000394866	0.0301565	-0.000217177	0.0806676	0.000215146	0.0845568	0.00148182	0.0812519	0.000560824	0.0447208	-0.00109434	0.0893066	0.000429935	0.066399	0.000570341	0.0836407	-0.00136811	0.0700106	-0.000479828	0.0736722	0.000957325	0.0531262
2018-06-20T08:36:00	0.0859919	-0.00227444	0.106299	-0.000294087	0.106823	-0.0141381	0.0929296	-0.000313206	0.0570536	-0.00141851	0.0744286	0.000167665	0.0756671	0.00141749	0.0962296	0.000464797	0.0897079	0.000472076	0.0516928	-0.000538583	0.0835583	0.000495295	0.073578	0.00158104	0.0674468	-0.00551526	0.100833	0.000394289	0.0284718	-0.000205045	0.0797372	0.000212664	0.0843754	0.00147864	0.0824487	0.000569085	0.0473099	-0.0011577	0.0894105	0.000430435	0.0658002	0.000565198	0.085559	-0.00139948	0.0697286	-0.000477896	0.0725144	0.00094228	0.0527441
2018-06-20T08:39:00	0.085041	-0.00224929	0.104534	-0.000289206	0.108737	-0.0143913	0.094062	-0.000317022	0.0535547	-0.00133152	0.0755462	0.000170182	0.0763908	0.00143105	0.0945596	0.000456731	0.0908348	0.000478007	0.0514313	-0.000535859	0.0841103	0.000498567	0.0728516	0.00156543	0.0689115	-0.00563504	0.0988479	0.000386528	0.0274131	-0.00019742	0.0769938	0.000205347	0.0846118	0.00148278	0.082968	0.000572669	0.0509168	-0.00124596	0.0899794	0.000433174	0.0664738	0.000570984	0.0870556	-0.00142397	0.0703257	-0.000481988	0.0724756	0.000941776	0.0538727
2018-06-20T08:42:00	0.0843209	-0.00223024	0.103501	-0.000286347	0.10938	-0.0144764	0.0936016	-0.000315471	0.0508151	-0.00126341	0.0771234	0.000173735	0.0762107	0.00142768	0.0917183	0.000443007	0.090699	0.000477292	0.0509799	-0.000531156	0.0839053	0.000497352	0.0725837	0.00155968	0.0702229	-0.00574227	0.0983389	0.000384538	0.0265582	-0.000191264	0.0738858	0.000197058	0.0836705	0.00146628	0.083096	0.000573553	0.05264	-0.00128813	0.0894422	0.000430588	0.0677268	0.000581747	0.0883455	-0.00144506	0.0707152	-0.000484657	0.0720552	0.000936313	0.0548622
2018-06-20T08:45:00	0.0838175	-0.00221693	0.10311	-0.000285264	0.108372	-0.0143431	0.0936259	-0.000315553	0.0468404	-0.00116458	0.0785492	0.000176947	0.0769856	0.00144219	0.0893139	0.000431393	0.090974	0.000478739	0.0511913	-0.000533359	0.0836866	0.000496056	0.0725032	0.00155795	0.0714273	-0.00584076	0.0980672	0.000383475	0.0271737	-0.000195696	0.0698577	0.000186315	0.08348	0.00146295	0.0830923	0.000573527	0.0529283	-0.00129519	0.088488	0.000425994	0.0688605	0.000591485	0.0885402	-0.00144825	0.0714187	-0.000489479	0.0718822	0.000934066	0.055608
2018-06-20T08:48:00	0.0833821	-0.00220541	0.102067	-0.000282379	0.108596	-0.0143728	0.0934431	-0.000314937	0.0406618	-0.00101097	0.0780275	0.000175772	0.077727	0.00145608	0.0855088	0.000413015	0.091217	0.000480018	0.0506773	-0.000528003	0.0835329	0.000495145	0.0728232	0.00156482	0.0726876	-0.00594381	0.0971184	0.000379765	0.0276733	-0.000199294	0.0671228	0.000179021	0.082957	0.00145378	0.0831464	0.0005739	0.0547796	-0.00134049	0.0874673	0.00042108	0.0696969	0.000598669	0.0895511	-0.00146478	0.0722438	-0.000495134	0.0721995	0.000938189	0.0564633
2018-06-20T08:51:00	0.0823581	-0.00217833	0.10204	-0.000282305	0.108718	-0.0143889	0.0930328	-0.000313554	0.0347381	-0.000863688	0.0783733	0.000176551	0.0779361	0.00146	0.0837824	0.000404676	0.090909	0.000478397	0.0512524	-0.000533996	0.0840017	0.000497924	0.0731205	0.00157121	0.0741005	-0.00605935	0.0957095	0.000374256	0.0283975	-0.00020451	0.0655079	0.000174714	0.0830661	0.00145569	0.082455	0.000569128	0.0562691	-0.00137694	0.0872422	0.000419996	0.0703193	0.000604015	0.0906836	-0.00148331	0.0725338	-0.000497121	0.0720929	0.000936803	0.0571429
2018-06-20T08:54:00	0.0811595	-0.00214662	0.101478	-0.000280749	0.108973	-0.0144226	0.093142	-0.000313922	0.0234846	-0.000583893	0.0783597	0.00017652	0.0785606	0.0014717	0.0760763	0.000367455	0.0912702	0.000480298	0.05061	-0.000527302	0.0847297	0.000502239	0.0732077	0.00157308	0.0746622	-0.00610528	0.0935358	0.000365756	0.0276298	-0.000198981	0.0642303	0.000171307	0.0817109	0.00143194	0.0828226	0.000571665	0.0566325	-0.00138583	0.0873982	0.000420747	0.0716675	0.000615595	0.0924831	-0.00151274	0.0734158	-0.000503167	0.072844	0.000946564	0.0571614
2018-06-20T08:57:00	0.0798822	-0.00211284	0.100348	-0.000277624	0.109055	-0.0144335	0.0925659	-0.00031198	0.0131219	-0.000326247	0.0775405	0.000174675	0.0790864	0.00148155	0.0731923	0.000353525	0.0910187	0.000478974	0.0505354	-0.000526525	0.086226	0.000511108	0.0731844	0.00157258	0.0742578	-0.00607222	0.09113	0.000356349	0.0265317	-0.000191073	0.0617583	0.000164713	0.0812108	0.00142318	0.0834176	0.000575772	0.0570096	-0.00139506	0.0865396	0.000416614	0.0722763	0.000620825	0.0933063	-0.00152621	0.0745803	-0.000511148	0.0729094	0.000947413	0.0572839
2018-06-20T09:00:00	0.0784499	-0.00207496	0.0995258	-0.000275349	0.107444	-0.0142202	0.0913848	-0.000307999	0.0058662	-0.00014585	0.0768045	0.000173017	0.0795368	0.00148999	0.0677127	0.000327058	0.0910523	0.000479151	0.0507865	-0.000529141	0.0867813	0.0005144	0.0741174	0.00159263	0.0752496	-0.00615332	0.090674	0.000354565	0.0254929	-0.000183592	0.0586951	0.000156544	0.0816601	0.00143105	0.0847051	0.000584659	0.0570662	-0.00139644	0.0863269	0.00041559	0.0729283	0.000626426	0.0947336	-0.00154955	0.0758787	-0.000520046	0.0739274	0.000960641	0.0584663
2018-06-20T09:03:00	0.0774172	-0.00204764	0.0986171	-0.000272835	0.106811	-0.0141364	0.0917383	-0.000309191	0.00597419	-0.000148535	0.0770892	0.000173658	0.0792499	0.00148461	0.0623826	0.000301313	0.0911214	0.000479515	0.0507867	-0.000529143	0.087451	0.000518369	0.0736092	0.00158171	0.0749242	-0.00612671	0.0890652	0.000348274	0.0249668	-0.000179803	0.0569818	0.000151974	0.0826945	0.00144918	0.084162	0.000580911	0.0537702	-0.00131579	0.086091	0.000414454	0.0729698	0.000626782	0.0953718	-0.00155999	0.0763394	-0.000523203	0.0734667	0.000954655	0.0591727
2018-06-20T09:06:00	0.077202	-0.00204195	0.0976593	-0.000270185	0.105895	-0.0140152	0.0921621	-0.000310619	0.00622987	-0.000154892	0.0768863	0.000173201	0.0803069	0.00150441	0.0583166	0.000281674	0.0911308	0.000479564	0.0509665	-0.000531016	0.0877857	0.000520353	0.0742218	0.00159487	0.0764326	-0.00625005	0.087911	0.000343761	0.025855	-0.000186199	0.0554686	0.000147938	0.0842807	0.00147698	0.0837629	0.000578156	0.0546227	-0.00133665	0.0857342	0.000412736	0.0729421	0.000626544	0.096163	-0.00157293	0.0778926	-0.000533849	0.0734703	0.000954702	0.0592275
2018-06-20T09:09:00	0.0776131	-0.00205282	0.0976939	-0.000270281	0.108174	-0.0143169	0.0922292	-0.000310845	0.00551228	-0.000137051	0.0766103	0.000172579	0.0817655	0.00153174	0.0542349	0.000261959	0.0912967	0.000480437	0.0497677	-0.000518526	0.0880564	0.000521958	0.0746488	0.00160405	0.0773216	-0.00632275	0.0844551	0.000330247	0.0257203	-0.000185229	0.0552882	0.000147457	0.0858863	0.00150512	0.0841017	0.000580495	0.0557276	-0.00136369	0.0866999	0.000417385	0.0732926	0.000629554	0.0969664	-0.00158607	0.0784699	-0.000537805	0.0734663	0.000954649	0.0588807
2018-06-20T09:12:00	0.0780156	-0.00206347	0.097883	-0.000270804	0.109	-0.0144262	0.0933091	-0.000314485	0.00703959	-0.000175024	0.0760802	0.000171385	0.082821	0.00155151	0.0490091	0.000236718	0.0912952	0.000480429	0.0504419	-0.00052555	0.0898222	0.000532425	0.074777	0.00160681	0.078588	-0.0064263	0.0836451	0.00032708	0.0269316	-0.000193953	0.054476	0.000145291	0.0873238	0.00153031	0.0852259	0.000588254	0.0594977	-0.00145595	0.0870188	0.000418921	0.0726177	0.000623758	0.0973529	-0.0015924	0.0784649	-0.000537771	0.0737448	0.000958269	0.0607742
2018-06-20T09:15:00	0.0786865	-0.00208121	0.0978775	-0.000270789	0.110561	-0.0146328	0.0939465	-0.000316633	0.0118351	-0.000294255	0.077092	0.000173665	0.0826799	0.00154887	0.0453543	0.000219065	0.091602	0.000482044	0.0516443	-0.000538078	0.0897295	0.000531875	0.0752982	0.001618	0.0801836	-0.00655678	0.0835823	0.000326835	0.0279738	-0.000201458	0.0544427	0.000145202	0.0877431	0.00153765	0.0867926	0.000599068	0.060447	-0.00147917	0.0872877	0.000420216	0.0731269	0.000628131	0.0976712	-0.0015976	0.0788798	-0.000540614	0.0748765	0.000972974	0.0622939
2018-06-20T09:18:00	0.0789649	-0.00208858	0.0994871	-0.000275242	0.111094	-0.0147034	0.094804	-0.000319524	0.0170227	-0.000423232	0.0784689	0.000176766	0.0833019	0.00156052	0.0421171	0.000203429	0.0929453	0.000489113	0.0527083	-0.000549164	0.0896425	0.00053136	0.0752189	0.0016163	0.081778	-0.00668715	0.0838932	0.00032805	0.0299803	-0.000215908	0.0555973	0.000148282	0.088637	0.00155332	0.0876529	0.000605006	0.0601801	-0.00147264	0.0878282	0.000422817	0.0740745	0.000636271	0.0980939	-0.00160452	0.079742	-0.000546524	0.0758746	0.000985944	0.0631158
2018-06-20T09:21:00	0.0787099	-0.00208183	0.10074	-0.000278708	0.112732	-0.0149202	0.0962899	-0.000324531	0.0193628	-0.000481413	0.0792747	0.000178582	0.0838259	0.00157034	0.0369528	0.000178485	0.0947068	0.000498382	0.0531801	-0.00055408	0.0892715	0.000529161	0.0758207	0.00162923	0.0835385	-0.00683111	0.0845975	0.000330804	0.0318624	-0.000229463	0.0565213	0.000150746	0.0890308	0.00156022	0.089743	0.000619432	0.0624485	-0.00152815	0.089157	0.000429214	0.0748106	0.000642593	0.0988214	-0.00161642	0.0810839	-0.000555721	0.0758693	0.000985875	0.0637463
2018-06-20T09:24:00	0.079004	-0.00208961	0.102296	-0.000283013	0.114193	-0.0151135	0.0969372	-0.000326713	0.0213574	-0.000531005	0.0812287	0.000182983	0.0852709	0.00159741	0.0315286	0.000152286	0.0969665	0.000510274	0.0538483	-0.000561041	0.0890752	0.000527997	0.0761611	0.00163655	0.0845365	-0.00691272	0.0855691	0.000334604	0.0346473	-0.000249519	0.0571132	0.000152325	0.0885605	0.00155198	0.0924463	0.000638091	0.06028	-0.00147509	0.0903012	0.000434723	0.0751203	0.000645254	0.100176	-0.00163857	0.0815407	-0.000558852	0.0775397	0.00100758	0.0655139
2018-06-20T09:27:00	0.0801036	-0.0021187	0.103082	-0.000285188	0.116332	-0.0153966	0.0981941	-0.000330949	0.0282841	-0.000703222	0.0826299	0.00018614	0.0876417	0.00164182	0.0260246	0.000125701	0.0975332	0.000513256	0.0545328	-0.000568173	0.0897638	0.000532079	0.0765507	0.00164492	0.086164	-0.00704581	0.0873297	0.000341488	0.0370449	-0.000266786	0.0587763	0.00015676	0.0886171	0.00155297	0.0944876	0.000652181	0.0598026	-0.00146341	0.0915202	0.000440591	0.0752294	0.000646191	0.101216	-0.00165558	0.0822279	-0.000563562	0.0789043	0.00102531	0.0662373
2018-06-20T09:30:00	0.0815203	-0.00215617	0.104866	-0.000290124	0.117565	-0.0155598	0.100346	-0.000338203	0.0334475	-0.000831598	0.0847081	0.000190821	0.089387	0.00167451	0.0224933	0.000108645	0.0989088	0.000520495	0.0556351	-0.000579658	0.0894255	0.000530073	0.0771329	0.00165743	0.0875207	-0.00715675	0.0905751	0.000354179	0.0402758	-0.000290053	0.0613861	0.000163721	0.090667	0.00158889	0.0976262	0.000673844	0.062488	-0.00152912	0.0925237	0.000445422	0.076342	0.000655748	0.10279	-0.00168133	0.083301	-0.000570916	0.0799879	0.00103939	0.0676338
2018-06-20T09:33:00	0.0830365	-0.00219627	0.106487	-0.000294607	0.118647	-0.015703	0.101492	-0.000342065	0.0374424	-0.000930924	0.0859038	0.000193515	0.0906362	0.00169791	0.01743	8.41886e-05	0.0999767	0.000526115	0.056464	-0.000588295	0.0920234	0.000545472	0.0783657	0.00168392	0.0890677	-0.00728325	0.0925087	0.00036174	0.0437885	-0.000315351	0.0632087	0.000168582	0.0925568	0.00162201	0.100643	0.000694665	0.0646736	-0.0015826	0.0935948	0.000450579	0.0772787	0.000663793	0.104158	-0.00170371	0.084227	-0.000577263	0.0817229	0.00106194	0.0694617
2018-06-20T09:36:00	0.0855181	-0.00226191	0.107822	-0.000298302	0.120384	-0.0159329	0.103413	-0.000348539	0.0474561	-0.00117989	0.0880666	0.000198387	0.0916285	0.0017165	0.0133999	6.47225e-05	0.101336	0.000533266	0.0582415	-0.000606815	0.0942061	0.000558411	0.0795911	0.00171025	0.089699	-0.00733488	0.0943394	0.000368898	0.0468195	-0.000337179	0.0672506	0.000179362	0.0943493	0.00165343	0.103094	0.000711588	0.0669475	-0.00163825	0.0954065	0.000459301	0.078884	0.000677582	0.105717	-0.00172921	0.0851146	-0.000583346	0.0835993	0.00108632	0.0704766
2018-06-20T09:39:00	0.0871922	-0.00230619	0.110528	-0.000305787	0.123379	-0.0163292	0.106064	-0.000357474	0.0537623	-0.00133668	0.0893287	0.00020123	0.0929468	0.0017412	0.00852746	4.11884e-05	0.103549	0.000544915	0.0590408	-0.000615142	0.0969079	0.000574425	0.0808202	0.00173666	0.0896427	-0.00733027	0.0957395	0.000374373	0.0504998	-0.000363683	0.0698587	0.000186318	0.0958613	0.00167992	0.104949	0.000724391	0.0690751	-0.00169031	0.0976582	0.000470141	0.0793568	0.000681644	0.107802	-0.00176332	0.0866562	-0.000593912	0.0852802	0.00110816	0.0726329
2018-06-20T09:42:00	0.0893881	-0.00236426	0.111771	-0.000309227	0.124924	-0.0165337	0.10784	-0.00036346	0.0607248	-0.00150979	0.089744	0.000202166	0.0932303	0.00174651	0.00678918	3.27923e-05	0.104863	0.000551827	0.0603642	-0.00062893	0.0992322	0.000588203	0.0827636	0.00177842	0.0885335	-0.00723957	0.0958971	0.00037499	0.053757	-0.000387141	0.0727513	0.000194032	0.0984791	0.0017258	0.106658	0.000736184	0.071743	-0.0017556	0.0995981	0.00047948	0.080641	0.000692674	0.109692	-0.00179423	0.0884266	-0.000606045	0.087373	0.00113536	0.0750671
2018-06-20T09:45:00	0.0917563	-0.0024269	0.114029	-0.000315473	0.129565	-0.017148	0.11043	-0.000372187	0.0693337	-0.00172383	0.0899005	0.000202518	0.0947698	0.00177535	0.00675289	3.2617e-05	0.106265	0.000559206	0.0611171	-0.000636774	0.100517	0.000595817	0.0846386	0.00181871	0.0885018	-0.00723698	0.0974309	0.000380987	0.0585405	-0.00042159	0.0758563	0.000202314	0.0997545	0.00174815	0.1091	0.000753038	0.0731238	-0.00178938	0.102466	0.000493284	0.0819052	0.000703533	0.112167	-0.00183471	0.0900227	-0.000616984	0.0895274	0.00116335	0.0761884
2018-06-20T09:48:00	0.0944779	-0.00249889	0.115926	-0.000320722	0.13379	-0.0177072	0.11284	-0.000380309	0.0738143	-0.00183523	0.091707	0.000206588	0.0967704	0.00181283	0.00742889	3.58821e-05	0.107696	0.000566736	0.0621051	-0.000647069	0.102157	0.000605539	0.0864609	0.00185787	0.0884612	-0.00723366	0.0988759	0.000386638	0.0630474	-0.000454047	0.0792041	0.000211242	0.0999237	0.00175111	0.11082	0.000764915	0.0742523	-0.001817	0.10437	0.000502454	0.0833547	0.000715984	0.114029	-0.00186517	0.0920538	-0.000630905	0.0908842	0.00118098	0.0778181
2018-06-20T09:51:00	0.0972976	-0.00257347	0.117425	-0.000324868	0.137583	-0.0182092	0.11534	-0.000388738	0.082113	-0.00204156	0.0924358	0.000208229	0.0986791	0.00184858	0.00970107	4.6857e-05	0.108677	0.000571901	0.0617154	-0.000643008	0.103905	0.0006159	0.0881993	0.00189522	0.0890959	-0.00728556	0.100056	0.000391251	0.0665961	-0.000479604	0.0822705	0.000219421	0.102343	0.00179351	0.112353	0.000775492	0.0768087	-0.00187956	0.106619	0.00051328	0.0846155	0.000726814	0.115312	-0.00188615	0.0934645	-0.000640573	0.0920988	0.00119677	0.0781095
2018-06-20T09:54:00	0.100725	-0.00266411	0.118578	-0.00032806	0.139378	-0.0184468	0.118087	-0.000397994	0.0891307	-0.00221604	0.0939685	0.000211682	0.100165	0.00187643	0.0102059	4.92953e-05	0.110041	0.000579075	0.0629327	-0.000655691	0.105861	0.000627495	0.0905598	0.00194594	0.0895433	-0.00732214	0.100237	0.000391961	0.0700886	-0.000504755	0.0850228	0.000226761	0.104952	0.00183923	0.114295	0.0007889	0.0791467	-0.00193677	0.109495	0.000527125	0.0855255	0.00073463	0.116867	-0.00191159	0.0945175	-0.00064779	0.0935843	0.00121607	0.0797767
2018-06-20T09:57:00	0.103169	-0.00272877	0.119316	-0.000330102	0.142243	-0.0188259	0.119705	-0.000403449	0.0906093	-0.0022528	0.0959632	0.000216176	0.100759	0.00188756	0.0103653	5.00654e-05	0.111726	0.000587942	0.064392	-0.000670895	0.109604	0.000649682	0.0925789	0.00198933	0.0885393	-0.00724004	0.0987992	0.000386338	0.0737245	-0.00053094	0.0882728	0.000235429	0.107534	0.00188448	0.115555	0.000797594	0.081113	-0.00198489	0.110915	0.000533959	0.0868346	0.000745875	0.119708	-0.00195805	0.0964541	-0.000661062	0.0943405	0.0012259	0.0821702
2018-06-20T10:00:00	0.104855	-0.00277335	0.120153	-0.000332416	0.144742	-0.0191567	0.12195	-0.000411016	0.102549	-0.00254966	0.0980144	0.000220796	0.101633	0.00190393	0.0126793	6.12422e-05	0.113514	0.000597352	0.065214	-0.00067946	0.112636	0.000667655	0.0938681	0.00201703	0.088417	-0.00723004	0.0992469	0.000388088	0.0769586	-0.000554231	0.0911176	0.000243017	0.110144	0.00193022	0.117818	0.000813215	0.0817042	-0.00199935	0.113422	0.000546029	0.0871591	0.000748663	0.12151	-0.00198753	0.0981918	-0.000672972	0.0958868	0.00124599	0.0841922
2018-06-20T10:03:00	0.105879	-0.00280045	0.120062	-0.000332165	0.147086	-0.0194669	0.124502	-0.000419616	0.108382	-0.00269469	0.0984605	0.000221801	0.102054	0.00191181	0.0141551	6.83702e-05	0.114878	0.000604533	0.0667439	-0.0006954	0.11458	0.000679175	0.0959061	0.00206083	0.0884872	-0.00723578	0.0997593	0.000390092	0.0813187	-0.000585631	0.0942775	0.000251444	0.113285	0.00198527	0.118391	0.000817169	0.0834075	-0.00204103	0.115765	0.000557311	0.0876032	0.000752477	0.122949	-0.00201107	0.100061	-0.000685782	0.0971851	0.00126286	0.0843913
2018-06-20T10:06:00	0.107764	-0.00285029	0.120291	-0.000332797	0.148541	-0.0196595	0.126068	-0.000424895	0.116916	-0.00290685	0.098619	0.000222159	0.102481	0.00191981	0.0165854	8.01088e-05	0.115728	0.000609004	0.0678659	-0.00070709	0.115881	0.000686887	0.0985487	0.00211761	0.0888805	-0.00726794	0.0993477	0.000388483	0.0843026	-0.00060712	0.0965777	0.000257579	0.115015	0.00201558	0.120102	0.000828982	0.0870495	-0.00213015	0.116917	0.000562855	0.0882467	0.000758005	0.124415	-0.00203505	0.10066	-0.000689886	0.098004	0.0012735	0.0839098
2018-06-20T10:09:00	0.109759	-0.00290307	0.120526	-0.00033345	0.149484	-0.0197842	0.128928	-0.000434533	0.130288	-0.00323932	0.0981465	0.000221094	0.103528	0.00193942	0.0216525	0.000104584	0.116707	0.000614155	0.0693664	-0.000722724	0.117264	0.000695087	0.100962	0.00216946	0.0894598	-0.00731531	0.0978804	0.000382745	0.0876258	-0.000631052	0.0981131	0.000261674	0.115568	0.00202528	0.120519	0.000831854	0.0876355	-0.0021445	0.118424	0.000570109	0.0900768	0.000773724	0.125944	-0.00206007	0.101724	-0.000697179	0.0985596	0.00128072	0.0854035
2018-06-20T10:12:00	0.111628	-0.00295251	0.120486	-0.000333337	0.149127	-0.019737	0.130575	-0.000440083	0.135422	-0.00336698	0.0980726	0.000220928	0.104735	0.00196203	0.0279375	0.00013494	0.117768	0.000619741	0.0710275	-0.000740031	0.119241	0.000706805	0.102918	0.00221151	0.0905271	-0.00740259	0.0959177	0.00037507	0.0914298	-0.000658448	0.099876	0.000266376	0.116657	0.00204435	0.119914	0.000827681	0.0920451	-0.0022524	0.119005	0.000572909	0.0914473	0.000785496	0.126098	-0.00206258	0.102567	-0.000702959	0.0989034	0.00128519	0.0865201
2018-06-20T10:15:00	0.113132	-0.00299229	0.119801	-0.000331441	0.149569	-0.0197955	0.132326	-0.000445985	0.145114	-0.00360794	0.0983144	0.000221472	0.105823	0.00198241	0.0331177	0.000159961	0.11823	0.00062217	0.071598	-0.000745974	0.12164	0.000721024	0.104817	0.00225231	0.0900499	-0.00736357	0.0922138	0.000360587	0.0939927	-0.000676905	0.10096	0.000269267	0.116478	0.00204123	0.120545	0.000832036	0.0933142	-0.00228345	0.119969	0.000577547	0.0921477	0.000791512	0.126393	-0.00206741	0.103805	-0.000711445	0.0985408	0.00128048	0.0879512
2018-06-20T10:18:00	0.113712	-0.00300762	0.120702	-0.000333935	0.149971	-0.0198487	0.134037	-0.000451751	0.153875	-0.00382576	0.0999763	0.000225216	0.106138	0.00198831	0.0373403	0.000180357	0.11892	0.000625799	0.0732575	-0.000763265	0.122224	0.000724489	0.105486	0.00226668	0.0899018	-0.00735145	0.0897692	0.000351027	0.0962543	-0.000693193	0.102375	0.000273042	0.115252	0.00201974	0.120892	0.000834433	0.0932707	-0.00228239	0.120503	0.00058012	0.0937457	0.000805239	0.127112	-0.00207917	0.104984	-0.000719521	0.0995318	0.00129336	0.0888119
2018-06-20T10:21:00	0.114465	-0.00302754	0.120631	-0.000333738	0.146067	-0.019332	0.136011	-0.000458405	0.156863	-0.00390006	0.100976	0.000227467	0.107143	0.00200714	0.0431196	0.000208272	0.119203	0.000627289	0.0753454	-0.000785019	0.122749	0.000727599	0.107145	0.00230233	0.090035	-0.00736234	0.0880243	0.000344204	0.0977424	-0.000703909	0.104021	0.00027743	0.116657	0.00204436	0.122097	0.000842747	0.093701	-0.00229292	0.120915	0.0005821	0.0953586	0.000819093	0.127756	-0.00208969	0.106665	-0.000731044	0.0993855	0.00129145	0.0893252
2018-06-20T10:24:00	0.115047	-0.00304294	0.12014	-0.00033238	0.146674	-0.0194124	0.136959	-0.000461599	0.160298	-0.00398547	0.101571	0.000228808	0.107686	0.00201731	0.0508684	0.000245698	0.120166	0.000632359	0.0765078	-0.000797129	0.123962	0.000734791	0.109321	0.00234909	0.0908939	-0.00743258	0.0864821	0.000338174	0.0997466	-0.000718343	0.105156	0.000280458	0.118697	0.0020801	0.123219	0.00085049	0.0944144	-0.00231038	0.120229	0.000578801	0.0961876	0.000826214	0.128468	-0.00210134	0.107717	-0.000738256	0.100746	0.00130913	0.0915857
2018-06-20T10:27:00	0.115984	-0.00306771	0.119381	-0.000330281	0.148539	-0.0196592	0.138519	-0.000466857	0.171808	-0.00427164	0.103784	0.000233793	0.108778	0.00203777	0.0619302	0.000299128	0.120748	0.000635424	0.0775655	-0.00080815	0.124612	0.000738643	0.109913	0.00236181	0.0912525	-0.0074619	0.0854349	0.000334079	0.100321	-0.000722482	0.105522	0.000281434	0.120924	0.00211913	0.12502	0.000862921	0.0963501	-0.00235775	0.120465	0.000579937	0.0971656	0.000834614	0.130141	-0.00212872	0.109891	-0.000753152	0.100358	0.00130408	0.0938174
2018-06-20T10:30:00	0.117354	-0.00310394	0.119453	-0.000330479	0.149617	-0.0198019	0.140518	-0.000473595	0.182265	-0.00453161	0.105228	0.000237046	0.11237	0.00210506	0.0737198	0.000356073	0.121781	0.000640857	0.0791756	-0.000824925	0.126993	0.000752759	0.111244	0.00239041	0.0925361	-0.00756687	0.0862826	0.000337394	0.101331	-0.000729756	0.1067	0.000284576	0.123119	0.0021576	0.126884	0.000875791	0.0973855	-0.00238308	0.120936	0.000582203	0.0987898	0.000848565	0.132951	-0.00217467	0.11212	-0.000768434	0.101678	0.00132124	0.0943136
2018-06-20T10:33:00	0.118103	-0.00312375	0.11915	-0.000329642	0.149509	-0.0197876	0.141064	-0.000475435	0.183042	-0.00455094	0.105357	0.000237337	0.113974	0.0021351	0.083523	0.000403423	0.122425	0.000644247	0.0806193	-0.000839967	0.129797	0.000769377	0.113186	0.00243213	0.0934973	-0.00764547	0.0860684	0.000336556	0.102277	-0.000736567	0.107119	0.000285694	0.124776	0.00218665	0.12816	0.000884595	0.0971995	-0.00237853	0.121238	0.000583658	0.0994522	0.000854256	0.134992	-0.00220807	0.114178	-0.000782535	0.102006	0.0013255	0.0941497
2018-06-20T10:36:00	0.119409	-0.00315829	0.119204	-0.000329789	0.150015	-0.0198546	0.141547	-0.000477064	0.189028	-0.00469978	0.104364	0.000235101	0.11647	0.00218187	0.0948825	0.00045829	0.123238	0.000648525	0.0818071	-0.000852342	0.132346	0.000784487	0.115674	0.0024856	0.0945439	-0.00773105	0.0864854	0.000338187	0.1013	-0.000729533	0.108259	0.000288733	0.127697	0.00223783	0.129647	0.00089486	0.095725	-0.00234245	0.122226	0.000588413	0.0999193	0.000858267	0.136156	-0.0022271	0.115512	-0.000791678	0.102295	0.00132926	0.0948973
2018-06-20T10:39:00	0.121156	-0.00320452	0.120387	-0.000333064	0.150961	-0.0199797	0.142379	-0.00047987	0.188652	-0.00469043	0.105796	0.000238325	0.119171	0.00223246	0.105156	0.00050791	0.12486	0.000657062	0.0834272	-0.000869222	0.136096	0.000806713	0.117576	0.00252646	0.0959673	-0.00784744	0.0877922	0.000343297	0.10044	-0.000723334	0.108244	0.000288695	0.12892	0.00225927	0.130548	0.00090108	0.0981496	-0.00240178	0.123195	0.000593077	0.100012	0.000859065	0.13772	-0.00225268	0.117605	-0.000806022	0.101944	0.00132469	0.0964033
2018-06-20T10:42:00	0.121031	-0.00320121	0.121251	-0.000335455	0.15215	-0.0201371	0.142763	-0.000481163	0.183607	-0.00456498	0.107048	0.000241147	0.122656	0.00229774	0.11613	0.000560917	0.126316	0.000664721	0.0845277	-0.000880688	0.138003	0.000818019	0.120724	0.00259412	0.0972432	-0.00795178	0.08975	0.000350952	0.0993799	-0.000715702	0.109964	0.000293282	0.130196	0.00228162	0.132285	0.000913071	0.0971298	-0.00237683	0.123504	0.000594566	0.101281	0.000869967	0.138277	-0.0022618	0.119666	-0.000820147	0.101575	0.0013199	0.0984406
2018-06-20T10:45:00	0.122369	-0.00323659	0.122756	-0.000339619	0.15223	-0.0201476	0.143037	-0.000482085	0.183098	-0.00455232	0.107354	0.000241835	0.125339	0.00234801	0.12417	0.000599749	0.128358	0.000675465	0.0858932	-0.000894915	0.140406	0.000832261	0.122584	0.00263408	0.0995474	-0.00814019	0.0928156	0.00036294	0.0994286	-0.000716053	0.108841	0.000290287	0.133171	0.00233375	0.133543	0.000921755	0.0955263	-0.00233759	0.124685	0.000600252	0.101825	0.000874639	0.139328	-0.00227899	0.121844	-0.000835079	0.101279	0.00131605	0.0992118
2018-06-20T10:48:00	0.124078	-0.00328179	0.124124	-0.000343402	0.153835	-0.0203601	0.143531	-0.000483752	0.176528	-0.00438898	0.107305	0.000241724	0.127816	0.00239441	0.129151	0.000623812	0.130043	0.000684333	0.0874991	-0.000911647	0.142031	0.000841894	0.125036	0.00268676	0.101531	-0.00830239	0.0963198	0.000376643	0.100937	-0.000726914	0.106847	0.000284968	0.135012	0.00236602	0.134268	0.000926755	0.0969598	-0.00237266	0.126384	0.00060843	0.103196	0.000886416	0.140985	-0.00230608	0.124401	-0.000852599	0.100889	0.00131099	0.0996125
2018-06-20T10:51:00	0.125337	-0.00331509	0.125169	-0.000346295	0.154702	-0.0204748	0.143386	-0.000483262	0.166226	-0.00413284	0.107885	0.000243031	0.1297	0.0024297	0.134794	0.000651068	0.130851	0.000688588	0.0877475	-0.000914235	0.142885	0.000846954	0.126856	0.00272587	0.103441	-0.00845854	0.0996499	0.000389664	0.100868	-0.00072642	0.105186	0.000280538	0.137566	0.00241077	0.134802	0.000930441	0.0949629	-0.0023238	0.127454	0.000613583	0.103732	0.000891018	0.142406	-0.00232932	0.126358	-0.000866011	0.100607	0.00130732	0.100126
2018-06-20T10:54:00	0.127273	-0.0033663	0.127001	-0.000351361	0.153812	-0.0203571	0.143164	-0.000482515	0.160166	-0.00398217	0.107804	0.00024285	0.131526	0.00246391	0.138631	0.000669598	0.131607	0.000692563	0.0887625	-0.000924811	0.145308	0.000861321	0.129446	0.00278153	0.105194	-0.00860196	0.10235	0.000400223	0.101523	-0.000731138	0.103236	0.000275337	0.139776	0.00244951	0.135084	0.000932386	0.097033	-0.00237446	0.128048	0.000616442	0.104203	0.000895061	0.142788	-0.00233558	0.128749	-0.000882404	0.100748	0.00130916	0.100706
2018-06-20T10:57:00	0.128682	-0.00340356	0.128459	-0.000355397	0.155974	-0.0206432	0.144063	-0.000485543	0.151289	-0.00376147	0.107593	0.000242375	0.135052	0.00252996	0.139714	0.000674828	0.133241	0.000701161	0.0896299	-0.000933847	0.147437	0.00087394	0.130915	0.00281309	0.107683	-0.00880546	0.105194	0.000411343	0.101375	-0.000730072	0.102102	0.000272313	0.14272	0.00250111	0.137168	0.000946775	0.0986586	-0.00241424	0.129449	0.000623184	0.105148	0.000903176	0.143728	-0.00235096	0.131436	-0.000900816	0.101582	0.00132	0.102273
2018-06-20T11:00:00	0.130081	-0.00344056	0.129869	-0.000359297	0.158257	-0.0209453	0.143579	-0.000483911	0.14152	-0.00351858	0.109092	0.000245751	0.136654	0.00255998	0.13946	0.000673604	0.134751	0.000709112	0.0909637	-0.000947745	0.149115	0.000883886	0.133126	0.0028606	0.11057	-0.00904154	0.109368	0.000427666	0.101346	-0.000729861	0.0991485	0.000264435	0.144131	0.00252582	0.137492	0.000949009	0.100046	-0.00244819	0.131264	0.000631922	0.105775	0.000908569	0.145342	-0.00237735	0.133473	-0.00091478	0.102275	0.001329	0.103899
2018-06-20T11:03:00	0.131725	-0.00348405	0.132019	-0.000365246	0.160745	-0.0212746	0.14388	-0.000484928	0.134337	-0.00334001	0.110056	0.000247923	0.138979	0.00260354	0.133902	0.000646759	0.135794	0.000714599	0.0916988	-0.000955403	0.149969	0.000888949	0.134957	0.00289995	0.113581	-0.00928776	0.112189	0.000438695	0.101208	-0.000728868	0.0979499	0.000261239	0.144425	0.00253098	0.138305	0.000954618	0.0983115	-0.00240574	0.132188	0.000636373	0.105824	0.000908989	0.144844	-0.00236921	0.135988	-0.000932012	0.102936	0.00133759	0.105965
2018-06-20T11:06:00	0.13273	-0.00351064	0.133133	-0.000368327	0.163413	-0.0216278	0.14405	-0.000485501	0.125671	-0.00312454	0.111658	0.00025153	0.142513	0.00266973	0.127027	0.000613553	0.137159	0.000721782	0.0933872	-0.000972995	0.151534	0.000898225	0.137048	0.00294488	0.117046	-0.00957111	0.115731	0.000452547	0.101203	-0.00072883	0.09754	0.000260146	0.146723	0.00257124	0.138016	0.000952629	0.09913	-0.00242577	0.134052	0.000645345	0.10545	0.000905775	0.14583	-0.00238534	0.138695	-0.00095057	0.102632	0.00133364	0.108017
2018-06-20T11:09:00	0.133893	-0.00354138	0.133765	-0.000370075	0.165449	-0.0218973	0.144034	-0.000485445	0.114384	-0.0028439	0.113375	0.0002554	0.145087	0.00271795	0.121667	0.000587661	0.137925	0.000725812	0.0942899	-0.0009824	0.152586	0.000904458	0.138597	0.00297816	0.119646	-0.00978371	0.119996	0.000469224	0.100882	-0.000726522	0.0971417	0.000259083	0.147522	0.00258526	0.138876	0.000958562	0.100803	-0.00246672	0.13405	0.000645338	0.106041	0.000910846	0.146553	-0.00239717	0.141128	-0.000967239	0.102323	0.00132962	0.109312
2018-06-20T11:12:00	0.134887	-0.00356768	0.135228	-0.000374124	0.167928	-0.0222254	0.14421	-0.00048604	0.110345	-0.00274348	0.11358	0.000255862	0.147995	0.00277243	0.115746	0.000559065	0.13984	0.000735889	0.0952055	-0.000991939	0.154067	0.000913236	0.140563	0.00302042	0.121125	-0.00990463	0.123225	0.000481851	0.0997763	-0.000718557	0.0971447	0.000259091	0.14837	0.00260011	0.139546	0.000963184	0.0983785	-0.00240738	0.134013	0.000645157	0.106493	0.000914735	0.148295	-0.00242565	0.143638	-0.000984443	0.102725	0.00133485	0.110688
2018-06-20T11:15:00	0.135827	-0.00359255	0.136885	-0.000378707	0.169274	-0.0224034	0.144697	-0.000487681	0.105866	-0.00263212	0.113586	0.000255874	0.151146	0.00283145	0.108406	0.000523608	0.140983	0.000741905	0.0954328	-0.000994307	0.156021	0.00092482	0.142188	0.00305533	0.12228	-0.00999912	0.125048	0.000488978	0.0998299	-0.000718943	0.0972151	0.000259279	0.149653	0.00262259	0.13938	0.000962039	0.0968312	-0.00236952	0.13448	0.000647404	0.107097	0.000919917	0.149809	-0.00245042	0.144936	-0.00099334	0.103813	0.00134899	0.111497
2018-06-20T11:18:00	0.136847	-0.00361952	0.138809	-0.000384032	0.170941	-0.0226242	0.145607	-0.000490747	0.0969994	-0.00241168	0.115511	0.00026021	0.154238	0.00288938	0.0987124	0.000476789	0.142408	0.000749406	0.0958871	-0.000999041	0.156433	0.000927266	0.143997	0.00309421	0.12319	-0.0100735	0.126846	0.00049601	0.100407	-0.000723102	0.0982208	0.000261961	0.151254	0.00265065	0.139787	0.000964854	0.0932611	-0.00228216	0.13533	0.0006515	0.108437	0.000931429	0.15004	-0.00245419	0.147196	-0.00100883	0.105068	0.00136529	0.112897
2018-06-20T11:21:00	0.137212	-0.00362917	0.140571	-0.000388905	0.173299	-0.0229362	0.146616	-0.00049415	0.0900917	-0.00223993	0.116429	0.00026228	0.156111	0.00292448	0.0887173	0.000428512	0.14269	0.000750887	0.0973628	-0.00101442	0.156385	0.000926981	0.145464	0.00312573	0.123432	-0.0100933	0.128078	0.000500827	0.100349	-0.000722678	0.098988	0.000264007	0.151719	0.00265879	0.139048	0.000959753	0.0937785	-0.00229482	0.136009	0.000654767	0.109768	0.000942862	0.15107	-0.00247105	0.148681	-0.00101901	0.105337	0.00136879	0.114717
2018-06-20T11:24:00	0.13779	-0.00364446	0.140986	-0.000390054	0.175387	-0.0232125	0.147485	-0.000497077	0.0871369	-0.00216647	0.1183	0.000266494	0.159044	0.00297942	0.0780314	0.000376898	0.143049	0.000752776	0.0982232	-0.00102338	0.155302	0.000920559	0.146222	0.00314202	0.124203	-0.0101563	0.130183	0.000509059	0.100542	-0.000724073	0.0985903	0.000262947	0.151203	0.00264975	0.140343	0.000968685	0.0913508	-0.00223541	0.137097	0.000660006	0.110943	0.000952958	0.152313	-0.00249137	0.151182	-0.00103615	0.108125	0.00140502	0.116527
2018-06-20T11:27:00	0.13888	-0.0036733	0.143314	-0.000396494	0.178504	-0.0236251	0.148972	-0.000502091	0.0847784	-0.00210783	0.121625	0.000273984	0.160601	0.00300859	0.0682955	0.000329873	0.143765	0.000756543	0.0992771	-0.00103436	0.154277	0.000914483	0.147269	0.00316452	0.125874	-0.010293	0.132651	0.000518711	0.101153	-0.000728469	0.0989416	0.000263883	0.150523	0.00263784	0.141047	0.000973549	0.0897496	-0.00219623	0.137531	0.000662093	0.112183	0.000963607	0.15265	-0.00249689	0.153523	-0.00105219	0.109867	0.00142765	0.11834
2018-06-20T11:30:00	0.139591	-0.00369211	0.144547	-0.000399904	0.180217	-0.0238517	0.149634	-0.00050432	0.0762347	-0.00189541	0.121752	0.00027427	0.163074	0.00305491	0.0572424	0.000276486	0.144605	0.000760966	0.0998772	-0.00104061	0.152195	0.000902144	0.14886	0.0031987	0.126173	-0.0103175	0.134378	0.000525464	0.101918	-0.000733977	0.0993316	0.000264924	0.150514	0.00263769	0.141163	0.000974351	0.0897099	-0.00219526	0.137643	0.000662633	0.113373	0.000973827	0.152369	-0.0024923	0.154719	-0.00106039	0.110945	0.00144166	0.121635
2018-06-20T11:33:00	0.14021	-0.00370849	0.146453	-0.000405178	0.182534	-0.0241584	0.149763	-0.000504754	0.0734891	-0.00182715	0.122676	0.000276352	0.165373	0.00309798	0.0512629	0.000247604	0.145067	0.000763398	0.100486	-0.00104696	0.148688	0.000881354	0.1501	0.00322534	0.127859	-0.0104553	0.136618	0.00053422	0.102324	-0.000736905	0.100325	0.000267572	0.148411	0.00260082	0.140552	0.000970131	0.0891002	-0.00218034	0.137312	0.000661038	0.114402	0.000982669	0.152755	-0.00249861	0.155197	-0.00106367	0.112863	0.00146658	0.122867
2018-06-20T11:36:00	0.14151	-0.00374285	0.148514	-0.00041088	0.183347	-0.0242661	0.150477	-0.000507162	0.07273	-0.00180827	0.122832	0.000276702	0.167731	0.00314216	0.0480066	0.000231876	0.145032	0.000763213	0.101846	-0.00106112	0.146243	0.000866861	0.15061	0.00323631	0.12908	-0.0105551	0.136968	0.00053559	0.103432	-0.000744883	0.101383	0.000270395	0.146155	0.00256129	0.141277	0.000975138	0.0868686	-0.00212573	0.137657	0.000662702	0.115528	0.00099234	0.153092	-0.00250412	0.155939	-0.00106875	0.11343	0.00147396	0.124146
2018-06-20T11:39:00	0.142704	-0.00377443	0.150051	-0.000415134	0.186427	-0.0246737	0.150975	-0.000508841	0.0718233	-0.00178573	0.124938	0.000281447	0.16976	0.00318016	0.0447105	0.000215955	0.146098	0.000768825	0.10354	-0.00107877	0.144654	0.000857441	0.151545	0.00325639	0.1302	-0.0106467	0.138334	0.000540934	0.103134	-0.000742741	0.103715	0.000276614	0.146184	0.0025618	0.141623	0.000977523	0.0880654	-0.00215501	0.138021	0.000664451	0.115326	0.000990603	0.153118	-0.00250455	0.155987	-0.00106908	0.115062	0.00149516	0.124386
2018-06-20T11:42:00	0.143344	-0.00379137	0.150775	-0.000417136	0.188403	-0.0249352	0.152685	-0.000514602	0.0712163	-0.00177064	0.125587	0.000282909	0.172098	0.00322396	0.040776	0.000196952	0.148448	0.000781188	0.10537	-0.00109784	0.142463	0.000844458	0.15159	0.00325735	0.13116	-0.0107252	0.137797	0.000538833	0.103699	-0.000746806	0.10553	0.000281455	0.14458	0.00253369	0.141441	0.000976266	0.0894392	-0.00218863	0.139011	0.000669221	0.116108	0.000997324	0.153227	-0.00250633	0.15612	-0.00106999	0.116462	0.00151335	0.126745
2018-06-20T11:45:00	0.144554	-0.00382338	0.152491	-0.000421882	0.190416	-0.0252016	0.153947	-0.000518855	0.0743593	-0.00184878	0.12669	0.000285393	0.172359	0.00322884	0.0362855	0.000175262	0.149001	0.000784097	0.107268	-0.00111762	0.140365	0.000832019	0.151251	0.00325006	0.130988	-0.0107111	0.138749	0.000542557	0.10428	-0.000750988	0.106789	0.000284812	0.143599	0.00251651	0.141285	0.000975192	0.0884527	-0.00216449	0.13883	0.000668345	0.117701	0.00101101	0.153733	-0.0025146	0.156262	-0.00107096	0.118113	0.00153481	0.128869
[truncated: 16,530 more rows]
[truncated: 73 more columns]
